# Supplementary material for: Combining Raman Spectroscopy, DFT Calculations, and Atomic Force Microscopy in the Study of Clinker Materials
Source: MDPI journal article supplement (doi:10.3390/ma14133648), 2021-06-30
Supplement: s1 [file s1]

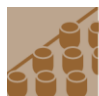

OUTPUT OF CRYSTAL09 PROGRAM FOR Ca<sub>2</sub>SiO<sub>4</sub> belite

```
=====
== date: sub, 9.03.2019. 10:48:14 CET
== hostname: lmfz640
== system: Linux lmfz640 4.15.0-46-generic #49-Ubuntu SMP Wed Feb 6 09:33:07 UTC 2019 x86_64 x86_64 x86_64
GNU/Linux
== user: vlasta
== scratch directory: /home/vlasta/crystal/tmp/tmp1870
== Available predefined $Pcrystal_ENV={isis,neolith,kalkyl,lenngren,interactive,localhost}
== $Pcrystal_ENV not defined by user. Trying to guess...
== None of the predefined parallel enviroments matched. Configuring "localhost"...
== Using predefined environment: localhost
== mpirun to use: /usr/bin/mpirun.mpic
== Got NSLOTS=8
== =====
Ca2SiO4 cif file
CRYSTAL
1 2 0
P 1 21/N 1
5.5075 6.7509 9.3055 94.597
7
20 2.259743027399E-01 3.440807844666E-01 4.324013106182E-01
20 -2.789152102887E-01 -4.958528969244E-01 2.015579430480E-01
14 2.679963311619E-01 -2.171331715239E-01 4.178753611653E-01
8 2.175666700724E-01 1.543947662208E-02 4.443157037911E-01
8 1.015604961355E-02 -3.312309356329E-01 3.638776329533E-01
8 4.773877212424E-01 -2.478022947534E-01 3.033977422278E-01
8 3.504877954991E-01 -3.317228088380E-01 -4.281642024754E-01
FREQCALC
END
END
20 7
0 0 8 2. 1.
191300. 0.0002204
26970. 0.001925
5696. 0.01109
1489.4 0.04995
448.3 0.17014
154.62 0.3685
60.37 0.4034
25.09 0.1452
0 1 6 8. 1.
448.6 -0.00575 0.00847
105.7 -0.0767 0.06027
34.69 -0.1122 0.2124
13.50 0.2537 0.3771
5.820 0.688 0.401
1.819 0.349 0.198
0 1 5 8. 1.
20.75 -0.0020 -0.0365
8.40 -0.1255 -0.0685
3.597 -0.6960 0.1570
1.408 1.029 1.482
0.726 0.944 1.025
0 1 1 2. 1.
0.453 1. 1.
0 1 1 0. 1.
0.295 1. 1.
0 3 2 0. 1.
3.1910 0.160
0.8683 0.313
0 3 1 0. 1.
0.2891 0.406
14 6
0 0 8 2. 1.0
87645.8 0.000237
12851.8 0.00192
2786.28 0.0109
728.043 0.0496
219.516 0.1668
75.9006 0.363
29.4602 0.4051
11.9891 0.1504
0 1 6 8. 1.0
165.958 -0.00884 0.00909
39.3727 -0.0859 0.0601
12.7112 -0.0712 0.1952
```

```

4.777 0.4147 0.3384
1.8482 0.6168 0.3006
0.7365 0.1154 0.0648
0 1 3 4. 1.
4.1752 -0.0199 -0.0087
1.4472 -0.1864 -0.00438
0.5023 0.0967 0.2207
0 1 1 0. 1.
0.322 1. 1.
0 1 1 0. 1.
0.13 1. 1.
0 3 1 0. 1.
0.6 1.
8 6
0 0 8 2.0 1.0
8020. 0.001080
1338. 0.008040
255.4 0.053240
69.22 0.168100
23.90 0.358100
9.264 0.385500
3.851 0.146800
1.212 0.072800
0 1 4 6. 1.0
49.43 -0.008830 0.009580
10.47 -0.091500 0.069600
3.235 -0.040200 0.206500
1.217 0.379000 0.347000
0 1 1 0. 1.0
0.486 1. 1.
0 1 1 0. 1.0
0.1925 1. 1.
0 3 1 0. 1.
2.0 1.
0 3 1 0. 1.
0.500 1.
99 0
ENDBS
SCFDIR
DFT
CORRELAT
VWN
EXCHANGE
LDA
XLGRID
END
SHRINK
6 6 6
TOLINTEG
6 6 6 6 12
FMIXING
35
MAXCYCLE
800
LEVSHIFT
6 1
TOLDEE
10
END
== Executing: /usr/bin/mpirun.mpich -np 8 -v -machinefile /home/vlasta/crystal/tmp/tmp1870/machines
/home/vlasta/crystal/tmp/tmp1870/Pcrystal
host: lmzf640

```

```

=====
mpiexec options:
-----

```

```

Base path: /usr/bin/
Launcher: (null)
Debug level: 1
Enable X: -1

```

```

Global environment:
-----

```

```

EXCITINGVISUAL=/usr/share/exciting/xml/visualizationtemplates

```

```

LS_COL=

```

```

ORS=rs=0:di=01;34:ln=01;36:mh=00:pi=40;33:so=01;35:do=01;35:bd=40;33;01:cd=40;33;01:or=40;31;01:mi=00:su=37;4
1:sg=30;43:ca=30;41:tw=30;42:ow=34;42:st=37;44:ex=01;32:*.tar=01;31:*.tgz=01;31:*.arc=01;31:*.arj=01;31:*.taz
=01;31:*.lha=01;31:*.lz4=01;31:*.lzh=01;31:*.lzma=01;31:*.tlz=01;31:*.txz=01;31:*.tzo=01;31:*.t7z=01;31:*.zip
=01;31:*.z=01;31:*.Z=01;31:*.dz=01;31:*.gz=01;31:*.lrz=01;31:*.lz=01;31:*.lzo=01;31:*.xz=01;31:*.zst=01;31:*.

```

```

tzst=01;31:*.bz2=01;31:*.bz=01;31:*.tbz=01;31:*.tbz2=01;31:*.tz=01;31:*.deb=01;31:*.rpm=01;31:*.jar=01;31:*.w
ar=01;31:*.ear=01;31:*.sar=01;31:*.rar=01;31:*.alz=01;31:*.ace=01;31:*.zoo=01;31:*.cpio=01;31:*.7z=01;31:*.rz
=01;31:*.cab=01;31:*.wim=01;31:*.swm=01;31:*.dwm=01;31:*.esd=01;31:*.jpg=01;35:*.jpeg=01;35:*.mjpg=01;35:*.mj
peg=01;35:*.gif=01;35:*.bmp=01;35:*.pbm=01;35:*.pgm=01;35:*.ppm=01;35:*.tga=01;35:*.xbm=01;35:*.xpm=01;35:*.t
if=01;35:*.tiff=01;35:*.png=01;35:*.svg=01;35:*.svgz=01;35:*.mng=01;35:*.pcx=01;35:*.mov=01;35:*.mpg=01;35:*.
mpeg=01;35:*.m2v=01;35:*.mkv=01;35:*.webm=01;35:*.ogm=01;35:*.mp4=01;35:*.m4v=01;35:*.mp4v=01;35:*.vob=01;35:
*.qt=01;35:*.nuv=01;35:*.wmv=01;35:*.asf=01;35:*.rm=01;35:*.rmvb=01;35:*.flc=01;35:*.avi=01;35:*.fli=01;35:*.
flv=01;35:*.gl=01;35:*.dl=01;35:*.xcf=01;35:*.xwd=01;35:*.yuv=01;35:*.cgm=01;35:*.emf=01;35:*.ogv=01;35:*.ogx
=01;35:*.aac=00;36:*.au=00;36:*.flac=00;36:*.m4a=00;36:*.mid=00;36:*.midi=00;36:*.mka=00;36:*.mp3=00;36:*.mpc
=00;36:*.ogg=00;36:*.ra=00;36:*.wav=00;36:*.oga=00;36:*.opus=00;36:*.spx=00;36:*.xspf=00;36:
LD_LIBRARY_PATH=/usr/local/haus/g16/bsd:/usr/local/haus/g16:/usr/local/haus/gv/lib
GPW_SETUP_PATH=/usr/share/gpaw-setups
GAUSS_BSDDIR=/usr/local/haus/g16/bsd
GRA6_EXEDIR=/home/vlasta/crystal/crgra2006/bin/Linux-pgf
CMR_REPOSITORY=/home/vlasta/cmr
LC_MEASUREMENT=hr_HR.UTF-8
SSH_CONNECTION=10.135.24.11 40589 10.135.24.38 22
LESSCLOSE=/usr/bin/lesspipe %s %s
LC_PAPER=hr_HR.UTF-8
LC_MONETARY=hr_HR.UTF-8
LANG=en_US.UTF-8
g16root=/usr/local/haus
PSEUDO_DIR=/home/vlasta/md/potentials/UPF
CRY2K6_GRA=/home/vlasta/crystal/crgra2006
_DSM_BARRIER=SHM
DACAPOPATH=/usr/share/dacapo-psp
OPENBLAS_NUM_THREADS=1
OLDPWD=/home/vlasta/crystal/tmp/c2s
XCrySDEN_TOPDIR=/usr/local/share/XCrySDen/
TMP_DIR=/home/vlasta/crystal/tmp/tmp1870
EXCITINGATAT=/home/vlasta/md/run/excitingscripts/ATAT@exciting
GV_DIR=/usr/local/haus/gv
DACAPOEXE_SERIAL=/usr/bin/dacapo_serial.run
CRY2K9_SCRDIR=/home/vlasta/crystal/tmp
SIESTA_SCRIPT=/home/vlasta/bin/run_siesta.py
LC_NAME=hr_HR.UTF-8
GAUSS_LEXEDIR=/usr/local/haus/g16/linda-exe
XDG_SESSION_ID=65
USER=vlasta
EXCITINGRUNDIR=/home/vlasta/md/run
CRY2K9_TEST=/home/vlasta/crystal/test_cases/inputs
VERSION=v2_0_1
HOTBIT_PARAMETERS=/usr/share/doc/hotbit/param/fixed_parameters
KSSOLVPATH=/home/vlasta/md/kssolv
NSLOTS=8
GAUSS_ARCHDIR=/usr/local/haus/g16/arch
ABINIT_PP_PATH=/usr/local/share/abinit-pseudopotentials//GGA_PAW:/usr/local/share/abinit-pseudopoten-
tials//GGA_HGHK:/usr/local/share/abinit-pseudopotentials//GGA_FHI:/usr/local/share/abinit-pseudopoten-
tials//LDA_TM:/usr/local/share/abinit-pseudopotentials//LDA_PAW:/usr/local/share/abinit-pseudopoten-
tials//LDA_HGH:/usr/local/share/abinit-pseudopotentials//GGA_FHI:/usr/local/share/abinit-pseudopoten-
tials//LDA_FHI:/usr/share/doc/abinit-doc/tests/Psps_for_tests
PWD=/home/vlasta/crystal/tmp/tmp1870
EXCITINGROOT=/usr
HOME=/home/vlasta
CRY2K9_UTILS=/home/vlasta/crystal/utils09
SSH_CLIENT=10.135.24.11 40589 22
DFTB_COMMAND=dftb+
TIMEFORMAT= Elapsed time = %01R
GMXCMD=mpirun -np 4 mdrun_mpi
PW_ROOT=/usr
DFTB_PREFIX=/home/vlasta/md/potentials/slako/pbc-0-3/
GAUSS_EXEDIR=/usr/local/haus/g16/bsd:/usr/local/haus/g16
MALLOCCHECK=0
SIESTA_PP_PATH=.
CRY2K9_EXEDIR=/home/vlasta/crystal/bin/Linux-ibort
EXCITINGASE=/home/vlasta/md/run/excitingscripts/ase
ASE_ABINIT_COMMAND=mpirun -np 2 abinit < PREFIX.files > PREFIX.log
LC_ADDRESS=hr_HR.UTF-8
LC_NUMERIC=hr_HR.UTF-8
DACAPOEXE_PARALLEL=/usr/bin/dacapo_mpi.run
FLEUR_INPGEN=/home/vlasta/bin/inpgen.x
SSH_TTY=/dev/pts/0
MAIL=/var/mail/vlasta
PAPERSIZE=a4
ELK_SPECIES_PATH=/usr/local/share/elk-dft/species/
TERM=xterm
SHELL=/bin/bash
CRY2K9_ROOT=/home/vlasta/crystal
CRY2K9_ARCH=Linux-ibort

```

```
--version 3.3a2 --iface-ip-env-name MPIR_CVAR_CH3_INTERFACE_HOSTNAME --hostname lmfz640 --global-core-map 0,8,8 --pmi-id-map 0,0 --global-process-count 8 --auto-cleanup 1 --pmi-kvsname kvs_1911_0 --pmi-process-mapping (vector, (0,1,8)) --ckptpoint-num -1 --global-inherited-env 93 'EXCITINGVISUAL=/usr/share/exciting/xml/visualizationtemplates' 'LS_COLORS=rs=0:di=01;34:ln=01;36:mh=00:pi=40;33:so=01;35:do=01;35:bd=40;33;01:cd=40;33;01:or=40;31;01:mi=00:su=37;41:sg=30;43:ca=30;41:tw=30;42:ow=34;42:st=37;44:ex=01;32:*.tar=01;31:*.tgz=01;31:*.arc=01;31:*.arj=01;31:*.taz=01;31:*.lha=01;31:*.lzh=01;31:*.lзма=01;31:*.tlz=01;31:*.txz=01;31:*.tzo=01;31:*.t7z=01;31:*.zip=01;31:*.z=01;31:*.Z=01;31:*.dz=01;31:*.gz=01;31:*.lrz=01;31:*.lz=01;31:*.lzo=01;31:*.xz=01;31:*.zst=01;31:*.tzst=01;31:*.bz2=01;31:*.bz=01;31:*.tbz=01;31:*.tbz2=01;31:*.tz=01;31:*.deb=01;31:*.rpm=01;31:*.jar=01;31:*.war=01;31:*.ear=01;31:*.sar=01;31:*.rar=01;31:*.alz=01;31:*.ace=01;31:*.zoo=01;31:*.cpio=01;31:*.7z=01;31:*.rz=01;31:*.cab=01;31:*.wim=01;31:*.swm=01;31:*.dwm=01;31:*.esd=01;31:*.jpg=01;35:*.jpeg=01;35:*.mjpg=01;35:*.mjpeg=01;35:*.gif=01;35:*.bmp=01;35:*.pbm=01;35:*.pgm=01;35:*.ppm=01;35:*.tga=01;35:*.xbm=01;35:*.xpm=01;35:*.tif=01;35:*.tiff=01;35:*.png=01;35:*.svg=01;35:*.svgz=01;35:*.mng=01;35:*.pcx=01;35:*.mov=01;35:*.mpg=01;35:*.mpeg=01;35:*.m2v=01;35:*.mkv=01;35:*.webm=01;35:*.ogm=01;35:*.mp4=01;35:*.m4v=01;35:*.mp4v=01;35:*.vob=01;35:*.qt=01;35:*.nuv=01;35:*.wmv=01;35:*.asf=01;35:*.rm=01;35:*.rmvb=01;35:*.flc=01;35:*.avi=01;35:*.fli=01;35:*.flv=01;35:*.gl=01;35:*.dl=01;35:*.xcf=01;35:*.xwd=01;35:*.yuv=01;35:*.cgm=01;35:*.emf=01;35:*.ogv=01;35:*.ogx=01;35:*.aac=00;36:*.au=00;36:*.flac=00;36:*.m4a=00;36:*.mid=00;36:*.midi=00;36:*.mka=00;36:*.mp3=00;36:*.mpc=00;36:*.ogg=00;36:*.ra=00;36:*.wav=00;36:*.oga=00;36:*.opus=00;36:*.spx=00;36:*.xspf=00;36:' 'LD_LIBRARY_PATH=/usr/local/kaus/g16/bsd:/usr/local/kaus/g16:/usr/local/kaus/gv/lib' 'GPAW_SETUP_PATH=/usr/share/gpaw-setups' 'GAUSS_BSDDIR=/usr/local/kaus/g16/bsd' 'GRA6_EXEDIR=/home/vlasta/crystal/crgra2006/bin/Linux-pgfl' 'CMR_REPOSITORY=/home/vlasta/cmr' 'LC_MEASUREMENT=hr_HR.UTF-8' 'SSH_CONNECTION=10.135.24.11 40589 10.135.24.38 22' 'LESSCLOSE=/usr/bin/lesspipe %s %s' 'LC_PAPER=hr_HR.UTF-8' 'LC_MONETARY=hr_HR.UTF-8' 'LANG=en_US.UTF-8' 'g16root=/usr/local/kaus' 'PSEUDO_DIR=/home/vlasta/md/potentials/UPF' 'CRY2K6_GRA=/home/vlasta/crystal/crgra2006' 'DSM_BARRIER=SHM' 'DACAPOPATH=/usr/share/dacapo-psp' 'OPENBLAS_NUM_THREADS=1' 'OLDPWD=/home/vlasta/crystal/tmp/c2s' 'XCRYST-
```



```

[proxy:0:0@lmfz640] PMI response: cmd=response_to_init pmi_version=1 pmi_subversion=1 rc=0
[proxy:0:0@lmfz640] got pmi command (from 29): init
pmi_version=1 pmi_subversion=1
[proxy:0:0@lmfz640] PMI response: cmd=response_to_init pmi_version=1 pmi_subversion=1 rc=0
[proxy:0:0@lmfz640] got pmi command (from 0): get_my_kvsnam

[proxy:0:0@lmfz640] PMI response: cmd=my_kvsnam kvsnam=kvs_1911_0
[proxy:0:0@lmfz640] got pmi command (from 6): get_appnum

[proxy:0:0@lmfz640] PMI response: cmd=appnum appnum=0
[proxy:0:0@lmfz640] got pmi command (from 8): get_appnum

[proxy:0:0@lmfz640] PMI response: cmd=appnum appnum=0
[proxy:0:0@lmfz640] got pmi command (from 13): get_appnum

[proxy:0:0@lmfz640] PMI response: cmd=appnum appnum=0
[proxy:0:0@lmfz640] got pmi command (from 17): get_appnum

[proxy:0:0@lmfz640] PMI response: cmd=appnum appnum=0
[proxy:0:0@lmfz640] got pmi command (from 21): get_maxes

[proxy:0:0@lmfz640] PMI response: cmd=maxes kvsnam_max=256 keylen_max=64 vallen_max=1024
[proxy:0:0@lmfz640] got pmi command (from 25): get_maxes

[proxy:0:0@lmfz640] PMI response: cmd=maxes kvsnam_max=256 keylen_max=64 vallen_max=1024
[proxy:0:0@lmfz640] got pmi command (from 0): get_my_kvsnam

[proxy:0:0@lmfz640] PMI response: cmd=my_kvsnam kvsnam=kvs_1911_0
[proxy:0:0@lmfz640] got pmi command (from 6): get_my_kvsnam

[proxy:0:0@lmfz640] PMI response: cmd=my_kvsnam kvsnam=kvs_1911_0
[proxy:0:0@lmfz640] got pmi command (from 8): get_my_kvsnam

[proxy:0:0@lmfz640] PMI response: cmd=my_kvsnam kvsnam=kvs_1911_0
[proxy:0:0@lmfz640] got pmi command (from 13): get_my_kvsnam

[proxy:0:0@lmfz640] PMI response: cmd=my_kvsnam kvsnam=kvs_1911_0
[proxy:0:0@lmfz640] got pmi command (from 17): get_my_kvsnam

[proxy:0:0@lmfz640] PMI response: cmd=my_kvsnam kvsnam=kvs_1911_0
[proxy:0:0@lmfz640] got pmi command (from 21): get_appnum

[proxy:0:0@lmfz640] PMI response: cmd=appnum appnum=0
[proxy:0:0@lmfz640] got pmi command (from 29): get_maxes

[proxy:0:0@lmfz640] PMI response: cmd=maxes kvsnam_max=256 keylen_max=64 vallen_max=1024
[proxy:0:0@lmfz640] got pmi command (from 0): get
kvsnam=kvs_1911_0 key=PMI_process_mapping
[proxy:0:0@lmfz640] PMI response: cmd=get_result rc=0 msg=success value=(vector, (0,1,8))
[proxy:0:0@lmfz640] got pmi command (from 6): get_my_kvsnam

[proxy:0:0@lmfz640] PMI response: cmd=my_kvsnam kvsnam=kvs_1911_0
[proxy:0:0@lmfz640] got pmi command (from 8): get_my_kvsnam

[proxy:0:0@lmfz640] PMI response: cmd=my_kvsnam kvsnam=kvs_1911_0
[proxy:0:0@lmfz640] got pmi command (from 13): get_my_kvsnam

[proxy:0:0@lmfz640] PMI response: cmd=my_kvsnam kvsnam=kvs_1911_0
[proxy:0:0@lmfz640] got pmi command (from 17): get_my_kvsnam

[proxy:0:0@lmfz640] PMI response: cmd=my_kvsnam kvsnam=kvs_1911_0
[proxy:0:0@lmfz640] got pmi command (from 21): get_my_kvsnam

[proxy:0:0@lmfz640] PMI response: cmd=my_kvsnam kvsnam=kvs_1911_0
[proxy:0:0@lmfz640] got pmi command (from 25): get_appnum

[proxy:0:0@lmfz640] PMI response: cmd=appnum appnum=0
[proxy:0:0@lmfz640] got pmi command (from 0): put
kvsnam=kvs_1911_0 key=sharedFilename[0] value=/dev/shm/mpich_shar_tmpnd8GMQ
[proxy:0:0@lmfz640] cached command: sharedFilename[0]=/dev/shm/mpich_shar_tmpnd8GMQ
[proxy:0:0@lmfz640] PMI response: cmd=put_result rc=0 msg=success
[proxy:0:0@lmfz640] got pmi command (from 6): get
kvsnam=kvs_1911_0 key=PMI_process_mapping
[proxy:0:0@lmfz640] PMI response: cmd=get_result rc=0 msg=success value=(vector, (0,1,8))
[proxy:0:0@lmfz640] got pmi command (from 8): get
kvsnam=kvs_1911_0 key=PMI_process_mapping
[proxy:0:0@lmfz640] PMI response: cmd=get_result rc=0 msg=success value=(vector, (0,1,8))
[proxy:0:0@lmfz640] got pmi command (from 13): get
kvsnam=kvs_1911_0 key=PMI_process_mapping

```

```
[proxy:0:0@lmfz640] PMI response: cmd=get_result rc=0 msg=success value=(vector, (0,1,8))
[proxy:0:0@lmfz640] got pmi command (from 17): get
kvsname=kvs_1911_0 key=PMI_process_mapping
[proxy:0:0@lmfz640] PMI response: cmd=get_result rc=0 msg=success value=(vector, (0,1,8))
[proxy:0:0@lmfz640] got pmi command (from 21): get_my_kvsname

[proxy:0:0@lmfz640] PMI response: cmd=my_kvsname kvsname=kvs_1911_0
[proxy:0:0@lmfz640] got pmi command (from 29): get_appnum

[proxy:0:0@lmfz640] PMI response: cmd=appnum appnum=0
[proxy:0:0@lmfz640] got pmi command (from 0): barrier_in

[proxy:0:0@lmfz640] got pmi command (from 6): barrier_in

[proxy:0:0@lmfz640] got pmi command (from 8): barrier_in

[proxy:0:0@lmfz640] got pmi command (from 13): barrier_in

[proxy:0:0@lmfz640] got pmi command (from 17): barrier_in

[proxy:0:0@lmfz640] got pmi command (from 21): get
kvsname=kvs_1911_0 key=PMI_process_mapping
[proxy:0:0@lmfz640] PMI response: cmd=get_result rc=0 msg=success value=(vector, (0,1,8))
[proxy:0:0@lmfz640] got pmi command (from 25): get_my_kvsname

[proxy:0:0@lmfz640] PMI response: cmd=my_kvsname kvsname=kvs_1911_0
[proxy:0:0@lmfz640] got pmi command (from 21): barrier_in

[proxy:0:0@lmfz640] got pmi command (from 29): get_my_kvsname

[proxy:0:0@lmfz640] PMI response: cmd=my_kvsname kvsname=kvs_1911_0
[proxy:0:0@lmfz640] got pmi command (from 25): get_my_kvsname

[proxy:0:0@lmfz640] PMI response: cmd=my_kvsname kvsname=kvs_1911_0
[proxy:0:0@lmfz640] got pmi command (from 29): get_my_kvsname

[proxy:0:0@lmfz640] PMI response: cmd=my_kvsname kvsname=kvs_1911_0
[proxy:0:0@lmfz640] got pmi command (from 25): get
kvsname=kvs_1911_0 key=PMI_process_mapping
[proxy:0:0@lmfz640] PMI response: cmd=get_result rc=0 msg=success value=(vector, (0,1,8))
[proxy:0:0@lmfz640] got pmi command (from 29): get
kvsname=kvs_1911_0 key=PMI_process_mapping
[proxy:0:0@lmfz640] PMI response: cmd=get_result rc=0 msg=success value=(vector, (0,1,8))
[proxy:0:0@lmfz640] got pmi command (from 25): barrier_in

[proxy:0:0@lmfz640] got pmi command (from 29): barrier_in

[proxy:0:0@lmfz640] flushing 1 put command(s) out
[proxy:0:0@lmfz640] forwarding command (cmd=put sharedFilename[0]=/dev/shm/mpich_shar_tmpnd8GMQ) upstream
[mpiexec@lmfz640] [pgid: 0] got PMI command: cmd=put sharedFilename[0]=/dev/shm/mpich_shar_tmpnd8GMQ
[proxy:0:0@lmfz640] forwarding command (cmd=barrier_in) upstream
[mpiexec@lmfz640] [pgid: 0] got PMI command: cmd=barrier_in
[mpiexec@lmfz640] PMI response to fd 6 pid 29: cmd=keyval_cache sharedFile-
name[0]=/dev/shm/mpich_shar_tmpnd8GMQ
[mpiexec@lmfz640] PMI response to fd 6 pid 29: cmd=barrier_out
[proxy:0:0@lmfz640] PMI response: cmd=barrier_out
[proxy:0:0@lmfz640] got pmi command (from 6): get
kvsname=kvs_1911_0 key=sharedFilename[0]
[proxy:0:0@lmfz640] PMI response: cmd=get_result rc=0 msg=success value=/dev/shm/mpich_shar_tmpnd8GMQ
[proxy:0:0@lmfz640] got pmi command (from 8): get
kvsname=kvs_1911_0 key=sharedFilename[0]
[proxy:0:0@lmfz640] PMI response: cmd=get_result rc=0 msg=success value=/dev/shm/mpich_shar_tmpnd8GMQ
[proxy:0:0@lmfz640] got pmi command (from 13): get
kvsname=kvs_1911_0 key=sharedFilename[0]
[proxy:0:0@lmfz640] PMI response: cmd=get_result rc=0 msg=success value=/dev/shm/mpich_shar_tmpnd8GMQ
[proxy:0:0@lmfz640] got pmi command (from 17): get
kvsname=kvs_1911_0 key=sharedFilename[0]
[proxy:0:0@lmfz640] PMI response: cmd=get_result rc=0 msg=success value=/dev/shm/mpich_shar_tmpnd8GMQ
[proxy:0:0@lmfz640] got pmi command (from 21): get
kvsname=kvs_1911_0 key=sharedFilename[0]
[proxy:0:0@lmfz640] PMI response: cmd=get_result rc=0 msg=success value=/dev/shm/mpich_shar_tmpnd8GMQ
[proxy:0:0@lmfz640] got pmi command (from 25): get
```

```
kvsname=kvs_1911_0 key=sharedFilename[0]
[proxy:0:0@lmfz640] PMI response: cmd=get_result rc=0 msg=success value=/dev/shm/mpich_shar_tmpnd8GMQ
[proxy:0:0@lmfz640] got pmi command (from 29): get
kvsname=kvs_1911_0 key=sharedFilename[0]
[proxy:0:0@lmfz640] PMI response: cmd=get_result rc=0 msg=success value=/dev/shm/mpich_shar_tmpnd8GMQ
[proxy:0:0@lmfz640] got pmi command (from 0): put
kvsname=kvs_1911_0 key=P0-businesscard value=description#lmfz640$port#52497$ifname#10.135.24.38$
[proxy:0:0@lmfz640] cached command: P0-businesscard=description#lmfz640$port#52497$ifname#10.135.24.38$
[proxy:0:0@lmfz640] PMI response: cmd=put_result rc=0 msg=success
[proxy:0:0@lmfz640] got pmi command (from 6): put
kvsname=kvs_1911_0 key=P1-businesscard value=description#lmfz640$port#59195$ifname#10.135.24.38$
[proxy:0:0@lmfz640] cached command: P1-businesscard=description#lmfz640$port#59195$ifname#10.135.24.38$
[proxy:0:0@lmfz640] PMI response: cmd=put_result rc=0 msg=success
[proxy:0:0@lmfz640] got pmi command (from 8): put
kvsname=kvs_1911_0 key=P2-businesscard value=description#lmfz640$port#40279$ifname#10.135.24.38$
[proxy:0:0@lmfz640] cached command: P2-businesscard=description#lmfz640$port#40279$ifname#10.135.24.38$
[proxy:0:0@lmfz640] PMI response: cmd=put_result rc=0 msg=success
[proxy:0:0@lmfz640] got pmi command (from 13): put
kvsname=kvs_1911_0 key=P3-businesscard value=description#lmfz640$port#33639$ifname#10.135.24.38$
[proxy:0:0@lmfz640] cached command: P3-businesscard=description#lmfz640$port#33639$ifname#10.135.24.38$
[proxy:0:0@lmfz640] PMI response: cmd=put_result rc=0 msg=success
[proxy:0:0@lmfz640] got pmi command (from 17): put
kvsname=kvs_1911_0 key=P4-businesscard value=description#lmfz640$port#40269$ifname#10.135.24.38$
[proxy:0:0@lmfz640] cached command: P4-businesscard=description#lmfz640$port#40269$ifname#10.135.24.38$
[proxy:0:0@lmfz640] PMI response: cmd=put_result rc=0 msg=success
[proxy:0:0@lmfz640] got pmi command (from 25): put
kvsname=kvs_1911_0 key=P6-businesscard value=description#lmfz640$port#39259$ifname#10.135.24.38$
[proxy:0:0@lmfz640] cached command: P6-businesscard=description#lmfz640$port#39259$ifname#10.135.24.38$
[proxy:0:0@lmfz640] PMI response: cmd=put_result rc=0 msg=success
[proxy:0:0@lmfz640] got pmi command (from 29): put
kvsname=kvs_1911_0 key=P7-businesscard value=description#lmfz640$port#36641$ifname#10.135.24.38$
[proxy:0:0@lmfz640] cached command: P7-businesscard=description#lmfz640$port#36641$ifname#10.135.24.38$
[proxy:0:0@lmfz640] PMI response: cmd=put_result rc=0 msg=success
[proxy:0:0@lmfz640] got pmi command (from 0): barrier_in

[proxy:0:0@lmfz640] got pmi command (from 6): barrier_in

[proxy:0:0@lmfz640] got pmi command (from 8): barrier_in

[proxy:0:0@lmfz640] got pmi command (from 13): barrier_in

[proxy:0:0@lmfz640] got pmi command (from 17): barrier_in

[proxy:0:0@lmfz640] got pmi command (from 21): put
kvsname=kvs_1911_0 key=P5-businesscard value=description#lmfz640$port#53233$ifname#10.135.24.38$
[proxy:0:0@lmfz640] cached command: P5-businesscard=description#lmfz640$port#53233$ifname#10.135.24.38$
[proxy:0:0@lmfz640] PMI response: cmd=put_result rc=0 msg=success
[proxy:0:0@lmfz640] got pmi command (from 25): barrier_in

[proxy:0:0@lmfz640] got pmi command (from 21): barrier_in

[proxy:0:0@lmfz640] got pmi command (from 29): barrier_in

[proxy:0:0@lmfz640] flushing 8 put command(s) out
[proxy:0:0@lmfz640] forwarding command (cmd=put P0-businesscard=description#lmfz640$port#52497$if-
name#10.135.24.38$ P1-businesscard=description#lmfz640$port#59195$ifname#10.135.24.38$ P2-businesscard=de-
scription#lmfz640$port#40279$ifname#10.135.24.38$ P3-businesscard=description#lmfz640$port#33639$if-
name#10.135.24.38$ P4-businesscard=description#lmfz640$port#40269$ifname#10.135.24.38$ P6-businesscard=de-
scription#lmfz640$port#39259$ifname#10.135.24.38$ P7-businesscard=description#lmfz640$port#36641$if-
name#10.135.24.38$ P5-businesscard=description#lmfz640$port#53233$ifname#10.135.24.38$) upstream
[mpiexec@lmfz640] [pgid: 0] got PMI command: cmd=put P0-businesscard=description#lmfz640$port#52497$if-
name#10.135.24.38$ P1-businesscard=description#lmfz640$port#59195$ifname#10.135.24.38$ P2-businesscard=de-
scription#lmfz640$port#40279$ifname#10.135.24.38$ P3-businesscard=description#lmfz640$port#33639$if-
name#10.135.24.38$ P4-businesscard=description#lmfz640$port#40269$ifname#10.135.24.38$ P6-businesscard=de-
scription#lmfz640$port#39259$ifname#10.135.24.38$ P7-businesscard=description#lmfz640$port#36641$if-
name#10.135.24.38$ P5-businesscard=description#lmfz640$port#53233$ifname#10.135.24.38$
[proxy:0:0@lmfz640] forwarding command (cmd=barrier_in) upstream
[mpiexec@lmfz640] [pgid: 0] got PMI command: cmd=barrier_in
[mpiexec@lmfz640] PMI response to fd 6 pid 29: cmd=keyval_cache P0-businesscard=descrip-
tion#lmfz640$port#52497$ifname#10.135.24.38$ P1-businesscard=description#lmfz640$port#59195$if-
name#10.135.24.38$ P2-businesscard=description#lmfz640$port#40279$ifname#10.135.24.38$ P3-businesscard=de-
scription#lmfz640$port#33639$ifname#10.135.24.38$ P4-businesscard=description#lmfz640$port#40269$if-
name#10.135.24.38$ P6-businesscard=description#lmfz640$port#39259$ifname#10.135.24.38$ P7-businesscard=de-
scription#lmfz640$port#36641$ifname#10.135.24.38$ P5-businesscard=description#lmfz640$port#53233$if-
name#10.135.24.38$
[mpiexec@lmfz640] PMI response to fd 6 pid 29: cmd=barrier_out
[proxy:0:0@lmfz640] PMI response: cmd=barrier_out
[proxy:0:0@lmfz640] PMI response: cmd=barrier_out
[proxy:0:0@lmfz640] PMI response: cmd=barrier_out
```



```
[proxy:0:0@lmfz640] PMI response: cmd=barrier_out
PROCESS      0  OF      8  WORKING
PROCESS      6  OF      8  WORKING
PROCESS      3  OF      8  WORKING
PROCESS      5  OF      8  WORKING
PROCESS      1  OF      8  WORKING
PROCESS      2  OF      8  WORKING
PROCESS      4  OF      8  WORKING
PROCESS      7  OF      8  WORKING
```

```
*****
*
*                      CRYSTAL09
*                  public : 2.0
*          December 10th, 2012 - parallel executable
*
*
*                      MAIN AUTHORS
*
*      R. DOVESI(1,10), V.R. SAUNDERS(2), C. ROETTI(1,10), R. ORLANDO (1,3),
*      C.M. ZICOVICH-WILSON(1,4), F. PASCALE(5), B. CIVALLERI(1,10), K. DOLL(6),
*      N.M. HARRISON(2,7), I. J. BUSH(2), Ph. D'ARCO(8), M. LLUNELL(9)
*
*      (1) THEORETICAL CHEMISTRY GROUP - UNIVERSITA' DI TORINO - TORINO (ITALY)
*      http://www.crystal.unito.it
*      (2) COMPUTATIONAL SCIENCE & ENGINEERING DEPARTMENT - STFC DARESBUY LABORATO*Y (UK)
*      http://www.cse.stfc.ac.uk/cmg/CRYSTAL/
*      (3) UNIVERSITA' DEL PIEMONTE ORIENTALE - ALESSANDRIA (ITALY)
*      (4) UNIVERSIDAD AUTONOMA DEL ESTADO DE MORELOS - CUERNAVACA (MEXICO)
*      (5) UNIVERSITE' HENRI POINCARÉ - NANCY (FRANCE)
*      (6) MPI FUER FESTKOERPERFORSCHUNG - STUTTGART (GERMANY)
*      (7) IMPERIAL COLLEGE - LONDON (UK)
*      (8) UNIVERSITE' PIERRE ET MARIE CURIE - PARIS (FRANCE)
*      (9) UNIVERSIDAD DE BARCELONA - BARCELONA (SPAIN)
*      (10) NIS - NANOSTRUCTURED INTERFACES AND SURFACES - TORINO (ITALY)
*      http://www.crystal.unito.it
*****
EEEEEEEEEE STARTING  DATE 09 03 2019 TIME 10:48:14.2
Ca2SiO4 cif file
```

```
CRYSTAL CALCULATION
(INPUT ACCORDING TO THE INTERNATIONAL TABLES FOR X-RAY CRYSTALLOGRAPHY)
CRYSTAL FAMILY      : MONOCLINIC
CRYSTAL CLASS  (GROTH - 1921)      : MONOCLINIC PRISMATIC
```

```
SPACE GROUP (CENTROSYMMETRIC)      : P 1 21/N 1
```

```
LATTICE PARAMETERS  (ANGSTROMS AND DEGREES) - CONVENTIONAL CELL
      A      B      C      ALPHA      BETA      GAMMA
      5.50750  6.75090  9.30550  90.00000  94.59700  90.00000
```

```
NUMBER OF IRREDUCIBLE ATOMS IN THE CONVENTIONAL CELL: 7
```

```
INPUT COORDINATES
```

```
ATOM AT. N.      COORDINATES
1  20      2.259743027399E-01  3.440807844666E-01  4.324013106182E-01
2  20      -2.789152102887E-01 -4.958528969244E-01  2.015579430480E-01
3  14      2.679963311619E-01 -2.171331715239E-01  4.178753611653E-01
4  8       2.175666700724E-01  1.543947662208E-02  4.443157037911E-01
5  8       1.015604961355E-02 -3.312309356329E-01  3.638776329533E-01
6  8       4.773877212424E-01 -2.478022947534E-01  3.033977422278E-01
7  8       3.504877954991E-01 -3.317228088380E-01 -4.281642024754E-01
```

```
<< INFORMATION >>: FROM NOW ON, ALL COORDINATES REFER TO THE PRIMITIVE CELL
```

```
LATTICE PARAMETERS  (ANGSTROMS AND DEGREES) - PRIMITIVE CELL
      A      B      C      ALPHA      BETA      GAMMA      VOLUME
```

COORDINATES OF THE EQUIVALENT ATOMS (FRACTIONAL UNITS)

```

NUMBER OF SYMMETRY OPERATORS          :      4
*****
* GEOMETRY EDITING - INPUT COORDINATES ARE GIVEN IN ANGSTROM
*****

```

GEOMETRY NOW FULLY CONSISTENT WITH THE GROUP

[illegible]

## FREQUENCY CALCULATION

```

GCALCO - MAX INDICES DIRECT LATTICE VECTOR      19      15      11
NO.OF VECTORS CREATED 6999 STARS 1862 RMAX      157.41387 BOHR

```

```

GEOMETRY FOR WAVE FUNCTION - DIMENSIONALITY OF THE SYSTEM      3
(NON PERIODIC DIRECTION: LATTICE PARAMETER FORMALLY SET TO 500)
*****
LATTICE PARAMETERS (ANGSTROMS AND DEGREES) - BOHR = 0.5291772083 ANGSTROM
PRIMITIVE CELL - CENTRING CODE 1/0 VOLUME=    344.870900 - DENSITY  3.310 g/cm^3
      A              B              C              ALPHA      BETA      GAMMA
      5.50750000    6.75090000    9.30550000    90.000000    94.597000    90.000000
*****
ATOMS IN THE ASYMMETRIC UNIT      7 - ATOMS IN THE UNIT CELL:  28

```

| ATOM |         | X/A                 | Y/B                 | Z/C                 |
|------|---------|---------------------|---------------------|---------------------|
| 1    | T 20 CA | 2.259743027399E-01  | 3.440807844666E-01  | 4.324013106182E-01  |
| 2    | F 20 CA | 2.740256972601E-01  | -1.559192155334E-01 | 6.759868938180E-02  |
| 3    | F 20 CA | -2.259743027399E-01 | -3.440807844666E-01 | -4.324013106182E-01 |
| 4    | F 20 CA | -2.740256972601E-01 | 1.559192155334E-01  | -6.759868938180E-02 |
| 5    | T 20 CA | -2.789152102887E-01 | -4.958528969244E-01 | 2.015579430480E-01  |
| 6    | F 20 CA | -2.210847897113E-01 | 4.147103075600E-03  | 2.984420569520E-01  |
| 7    | F 20 CA | 2.789152102887E-01  | 4.958528969244E-01  | -2.015579430480E-01 |
| 8    | F 20 CA | 2.210847897113E-01  | -4.147103075600E-03 | -2.984420569520E-01 |
| 9    | T 14 SI | 2.679963311619E-01  | -2.171331715239E-01 | 4.178753611653E-01  |
| 10   | F 14 SI | 2.320036688381E-01  | 2.828668284761E-01  | 8.212463883470E-02  |
| 11   | F 14 SI | -2.679963311619E-01 | 2.171331715239E-01  | -4.178753611653E-01 |
| 12   | F 14 SI | -2.320036688381E-01 | -2.828668284761E-01 | -8.212463883470E-02 |

|    |   |   |   |                     |                     |                     |
|----|---|---|---|---------------------|---------------------|---------------------|
| 13 | T | 8 | O | 2.175666700724E-01  | 1.543947662208E-02  | 4.443157037911E-01  |
| 14 | F | 8 | O | 2.824333299276E-01  | -4.845605233779E-01 | 5.568429620890E-02  |
| 15 | F | 8 | O | -2.175666700724E-01 | -1.543947662208E-02 | -4.443157037911E-01 |
| 16 | F | 8 | O | -2.824333299276E-01 | 4.845605233779E-01  | -5.568429620890E-02 |
| 17 | T | 8 | O | 1.015604961355E-02  | -3.312309356329E-01 | 3.638776329533E-01  |
| 18 | F | 8 | O | 4.898439503864E-01  | 1.687690643671E-01  | 1.361223670467E-01  |
| 19 | F | 8 | O | -1.015604961355E-02 | 3.312309356329E-01  | -3.638776329533E-01 |
| 20 | F | 8 | O | -4.898439503865E-01 | -1.687690643671E-01 | -1.361223670467E-01 |
| 21 | T | 8 | O | 4.773877212424E-01  | -2.478022947534E-01 | 3.033977422278E-01  |
| 22 | F | 8 | O | 2.261227875760E-02  | 2.521977052466E-01  | 1.966022577722E-01  |
| 23 | F | 8 | O | -4.773877212424E-01 | 2.478022947534E-01  | -3.033977422278E-01 |
| 24 | F | 8 | O | -2.261227875760E-02 | -2.521977052466E-01 | -1.966022577722E-01 |
| 25 | T | 8 | O | 3.504877954991E-01  | -3.317228088380E-01 | -4.281642024754E-01 |
| 26 | F | 8 | O | 1.495122045009E-01  | 1.682771911620E-01  | -7.183579752460E-02 |
| 27 | F | 8 | O | -3.504877954991E-01 | 3.317228088380E-01  | 4.281642024754E-01  |
| 28 | F | 8 | O | -1.495122045009E-01 | -1.682771911620E-01 | 7.183579752460E-02  |

T = ATOM BELONGING TO THE ASYMMETRIC UNIT

\*\*\*\* 4 SYMMOPS - TRANSLATORS IN FRACTIONAL UNITS

| V | INV | ROTATION MATRICES |      |       |       |       |       |      |      | TRANSLATOR |      |      |      |
|---|-----|-------------------|------|-------|-------|-------|-------|------|------|------------|------|------|------|
| 1 | 1   | 1.00              | 0.00 | 0.00  | 0.00  | 1.00  | 0.00  | 0.00 | 0.00 | 1.00       | 0.00 | 0.00 | 0.00 |
| 2 | 2   | -1.00             | 0.00 | 0.00  | -0.00 | 1.00  | 0.00  | 0.00 | 0.00 | -1.00      | 0.50 | 0.50 | 0.50 |
| 3 | 3   | -1.00             | 0.00 | 0.00  | 0.00  | -1.00 | 0.00  | 0.00 | 0.00 | -1.00      | 0.00 | 0.00 | 0.00 |
| 4 | 4   | 1.00              | 0.00 | -0.00 | 0.00  | -1.00 | -0.00 | 0.00 | 0.00 | 1.00       | 0.50 | 0.50 | 0.50 |

DIRECT LATTICE VECTORS CARTESIAN COMPONENTS (ANGSTROM)

|  | X                   | Y                  | Z                  |
|--|---------------------|--------------------|--------------------|
|  | 0.550750000000E+01  | 0.337237112315E-15 | 0.000000000000E+00 |
|  | 0.000000000000E+00  | 0.675090000000E+01 | 0.000000000000E+00 |
|  | -0.745805423921E+00 | 0.569797539473E-15 | 0.927556491647E+01 |

CARTESIAN COORDINATES - PRIMITIVE CELL

\*\*\*\*\*

| *  | ATOM  | X (ANGSTROM)        | Y (ANGSTROM)        | Z (ANGSTROM)        |
|----|-------|---------------------|---------------------|---------------------|
| 1  | 20 CA | 9.220662295702E-01  | 2.322854967856E+00  | 4.010766426606E+00  |
| 2  | 20 CA | 1.458781058469E+00  | -1.052595032144E+00 | 6.270160316292E-01  |
| 3  | 20 CA | -9.220662295702E-01 | -2.322854967856E+00 | -4.010766426606E+00 |
| 4  | 20 CA | -1.458781058469E+00 | 1.052595032144E+00  | -6.270160316292E-01 |
| 5  | 20 CA | -1.686448527825E+00 | -3.347453321847E+00 | 1.869563785172E+00  |
| 6  | 20 CA | -1.440204184136E+00 | 2.799667815307E-02  | 2.768218673063E+00  |
| 7  | 20 CA | 1.686448527825E+00  | 3.347453321847E+00  | -1.869563785172E+00 |
| 8  | 20 CA | 1.440204184136E+00  | -2.799667815307E-02 | -2.768218673063E+00 |
| 9  | 14 SI | 1.164336082994E+00  | -1.465844327641E+00 | 3.876030039482E+00  |
| 10 | 14 SI | 1.216511205045E+00  | 1.909605672359E+00  | 7.617524187529E-01  |
| 11 | 14 SI | -1.164336082994E+00 | 1.465844327641E+00  | -3.876030039482E+00 |
| 12 | 14 SI | -1.216511205045E+00 | -1.909605672359E+00 | -7.617524187529E-01 |
| 13 | 8 O   | 8.668753736029E-01  | 1.042303627280E-01  | 4.121279153921E+00  |
| 14 | 8 O   | 1.513971914436E+00  | -3.271219637272E+00 | 5.165033043136E-01  |
| 15 | 8 O   | -8.668753736029E-01 | -1.042303627280E-01 | -4.121279153921E+00 |
| 16 | 8 O   | -1.513971914436E+00 | 3.271219637272E+00  | -5.165033043136E-01 |
| 17 | 8 O   | -2.154474690536E-01 | -2.236106923364E+00 | 3.375170606110E+00  |
| 18 | 8 O   | 2.596294757093E+00  | 1.139343076636E+00  | 1.262611852125E+00  |
| 19 | 8 O   | 2.154474690536E-01  | 2.236106923364E+00  | -3.375170606110E+00 |
| 20 | 8 O   | -2.596294757093E+00 | -1.139343076636E+00 | -1.262611852125E+00 |
| 21 | 8 O   | 2.402937192984E+00  | -1.672888511651E+00 | 2.814185453544E+00  |
| 22 | 8 O   | -2.208990494422E-02 | 1.702561488349E+00  | 1.823597004691E+00  |
| 23 | 8 O   | -2.402937192984E+00 | 1.672888511651E+00  | -2.814185453544E+00 |
| 24 | 8 O   | 2.208990494422E-02  | -1.702561488349E+00 | -1.823597004691E+00 |
| 25 | 8 O   | 2.249638718246E+00  | -2.239427510184E+00 | -3.971464854969E+00 |
| 26 | 8 O   | 8.770139937143E-01  | 1.136022489816E+00  | -6.663176032658E-01 |
| 27 | 8 O   | -2.249638718246E+00 | 2.239427510184E+00  | 3.971464854969E+00  |
| 28 | 8 O   | -8.770139937143E-01 | -1.136022489816E+00 | 6.663176032658E-01  |

\*\*\*\*\*

LOCAL ATOMIC FUNCTIONS BASIS SET

\*\*\*\*\*

| ATOM | X(AU) | Y(AU) | Z(AU) | NO.   | TYPE | EXPONENT | S COEF | P COEF | D/F/G COEF |
|------|-------|-------|-------|-------|------|----------|--------|--------|------------|
| 1    | CA    | 1.742 | 4.390 | 7.579 |      |          |        |        |            |

1 S

|           |           |           |           |
|-----------|-----------|-----------|-----------|
| 1.913E+05 | 2.204E-04 | 0.000E+00 | 0.000E+00 |
| 2.697E+04 | 1.925E-03 | 0.000E+00 | 0.000E+00 |
| 5.696E+03 | 1.109E-02 | 0.000E+00 | 0.000E+00 |
| 1.489E+03 | 4.995E-02 | 0.000E+00 | 0.000E+00 |
| 4.483E+02 | 1.701E-01 | 0.000E+00 | 0.000E+00 |
| 1.546E+02 | 3.685E-01 | 0.000E+00 | 0.000E+00 |

[illegible]

```

1.925E-01 1.000E+00 1.000E+00 0.000E+00
318- 322 D
2.000E+00 0.000E+00 0.000E+00 1.000E+00
323- 327 D
5.000E-01 0.000E+00 0.000E+00 1.000E+00
14 O 2.861 -6.182 0.976
15 O -1.638 -0.197 -7.788
16 O -2.861 6.182 -0.976
17 O -0.407 -4.226 6.378
18 O 4.906 2.153 2.386
19 O 0.407 4.226 -6.378
20 O -4.906 -2.153 -2.386
21 O 4.541 -3.161 5.318
22 O -0.042 3.217 3.446
23 O -4.541 3.161 -5.318
24 O 0.042 -3.217 -3.446
25 O 4.251 -4.232 -7.505
26 O 1.657 2.147 -1.259
27 O -4.251 4.232 7.505
28 O -1.657 -2.147 1.259
INFORMATION **** READM2 **** FULL DIRECT SCF (MONO AND BIEL INT) SELECTED
INFORMATION **** TOLINTEG **** COULOMB AND EXCHANGE SERIES TOLERANCES MODIFIED
INFORMATION **** MAXCYCLE **** MAX NUMBER OF SCF CYCLES SET TO 800
INFORMATION **** LEVSHIFT **** LEVEL SHIFTER ACTIVE
INFORMATION **** TOLDEE **** SCF TOL ON TOTAL ENERGY SET TO 10
*****
N. OF ATOMS PER CELL 28 COULOMB OVERLAP TOL (T1) 10** -6
NUMBER OF SHELLS 176 COULOMB PENETRATION TOL (T2) 10** -6
NUMBER OF AO 672 EXCHANGE OVERLAP TOL (T3) 10** 20
N. OF ELECTRONS PER CELL 344 EXCHANGE PSEUDO OVP (F(G)) (T4) 10** 20
CORE ELECTRONS PER CELL 216 EXCHANGE PSEUDO OVP (P(G)) (T5) 10** 20
N. OF SYMMETRY OPERATORS 4 POLE ORDER IN MONO ZONE 4
*****
TYPE OF CALCULATION : RESTRICTED CLOSED SHELL
Kohn-Sham HAMILTONIAN

(EXCHANGE) [CORRELATION] FUNCTIONAL: (DIRAC-SLATER LDA) [VOSKO-WILK-NUSAIR]

EIGENVALUE LEVEL SHIFTING OF 0.600 HARTREE
LOCKING - FERMI ENERGY ALTERED BY LEVEL SHIFTER

CAPPA:IS1 6;IS2 6;IS3 6; K PTS MONK NET 80; SYMMOPS: K SPACE 4;G SPACE 4

*****
MAX NUMBER OF SCF CYCLES 800 CONVERGENCE ON DELTAP 10**-20
WEIGHT OF F(I) IN F(I+1) 35% CONVERGENCE ON ENERGY 10**-10
EIGENVALUE LEVEL SHIFTING OF 0.600 HARTREE
LOCKING - FERMI ENERGY ALTERED BY LEVEL SHIFTER
SHRINK. FACT.(MONKH.) 6 6 6 NUMBER OF K POINTS IN THE IBZ 80
SHRINKING FACTOR(GILAT NET) 6 NUMBER OF K POINTS(GILAT NET) 80
*****
*** K POINTS COORDINATES (OBLIQUE COORDINATES IN UNITS OF IS = 6)
1-R( 0 0 0) 2-C( 1 0 0) 3-C( 2 0 0) 4-R( 3 0 0)
5-C( 0 1 0) 6-C( 1 1 0) 7-C( 2 1 0) 8-C( 3 1 0)
9-C( 0 2 0) 10-C( 1 2 0) 11-C( 2 2 0) 12-C( 3 2 0)
13-R( 0 3 0) 14-C( 1 3 0) 15-C( 2 3 0) 16-R( 3 3 0)
17-C( 0 0 1) 18-C( 1 0 1) 19-C( 2 0 1) 20-C( 3 0 1)
21-C( 4 0 1) 22-C( 5 0 1) 23-C( 0 1 1) 24-C( 1 1 1)
25-C( 2 1 1) 26-C( 3 1 1) 27-C( 4 1 1) 28-C( 5 1 1)
29-C( 0 2 1) 30-C( 1 2 1) 31-C( 2 2 1) 32-C( 3 2 1)
33-C( 4 2 1) 34-C( 5 2 1) 35-C( 0 3 1) 36-C( 1 3 1)
37-C( 2 3 1) 38-C( 3 3 1) 39-C( 4 3 1) 40-C( 5 3 1)
41-C( 0 0 2) 42-C( 1 0 2) 43-C( 2 0 2) 44-C( 3 0 2)
45-C( 4 0 2) 46-C( 5 0 2) 47-C( 0 1 2) 48-C( 1 1 2)
49-C( 2 1 2) 50-C( 3 1 2) 51-C( 4 1 2) 52-C( 5 1 2)
53-C( 0 2 2) 54-C( 1 2 2) 55-C( 2 2 2) 56-C( 3 2 2)
57-C( 4 2 2) 58-C( 5 2 2) 59-C( 0 3 2) 60-C( 1 3 2)
61-C( 2 3 2) 62-C( 3 3 2) 63-C( 4 3 2) 64-C( 5 3 2)
65-R( 0 0 3) 66-C( 1 0 3) 67-C( 2 0 3) 68-R( 3 0 3)
69-C( 0 1 3) 70-C( 1 1 3) 71-C( 2 1 3) 72-C( 3 1 3)
73-C( 0 2 3) 74-C( 1 2 3) 75-C( 2 2 3) 76-C( 3 2 3)
77-R( 0 3 3) 78-C( 1 3 3) 79-C( 2 3 3) 80-R( 3 3 3)

DIRECT LATTICE VECTORS COMPON. (A.U.) RECIP. LATTICE VECTORS COMPON. (A.U.)
X Y Z X Y Z
10.4076667 0.0000000 0.0000000 0.6037074 0.0000000 0.0485413
0.0000000 12.7573522 0.0000000 -0.0000000 0.4925148 -0.0000000
-1.4093680 0.0000000 17.5282774 0.0000000 0.0000000 0.3584599

```

DISK SPACE FOR EIGENVECTORS (FTN 10) 68640768 REALS

SYMMETRY ADAPTION OF THE BLOCH FUNCTIONS ENABLED

TTTTTTTTTTTTTTTTTTTTTTTTTTTTTTTTTTT gordshl TELAPSE 0.02 TCPU 0.01

DIMENSIONS P(G)= 389912 F(G)= 195388 P(G),F(G) (IRR) 49967

MAX G-VECTOR INDEX FOR 1- AND 2-ELECTRON INTEGRALS 33

TTTTTTTTTTTTTTTTTTTTTTTTTTTTTTTTTTT INPUT TELAPSE 0.03 TCPU 0.02

NEIGHBORS OF THE NON-EQUIVALENT ATOMS

N = NUMBER OF NEIGHBORS AT DISTANCE R

| ATOM | N | R/ANG  | R/AU   | NEIGHBORS (ATOM LABELS AND CELL INDICES) |        |  |
|------|---|--------|--------|------------------------------------------|--------|--|
| 1 CA | 1 | 2.2221 | 4.1991 | 13 O                                     | 0 0 0  |  |
| 1 CA | 1 | 2.3376 | 4.4175 | 27 O                                     | 1 0 0  |  |
| 1 CA | 1 | 2.3849 | 4.5068 | 19 O                                     | 0 0 1  |  |
| 1 CA | 1 | 2.4617 | 4.6519 | 22 O                                     | 0 0 0  |  |
| 1 CA | 1 | 2.5500 | 4.8188 | 17 O                                     | 0 1 0  |  |
| 1 CA | 1 | 2.6079 | 4.9282 | 25 O                                     | 0 1 1  |  |
| 5 CA | 1 | 2.3802 | 4.4979 | 22 O                                     | 0-1 0  |  |
| 5 CA | 1 | 2.3803 | 4.4981 | 17 O                                     | 0 0 0  |  |
| 5 CA | 1 | 2.3890 | 4.5146 | 21 O                                     | -1 0 0 |  |
| 5 CA | 1 | 2.3959 | 4.5277 | 16 O                                     | 0-1 0  |  |
| 5 CA | 1 | 2.4678 | 4.6635 | 27 O                                     | 0-1 0  |  |
| 5 CA | 1 | 2.6445 | 4.9974 | 28 O                                     | 0 0 0  |  |
| 9 SI | 1 | 1.6167 | 3.0551 | 13 O                                     | 0 0 0  |  |
| 9 SI | 1 | 1.6445 | 3.1077 | 21 O                                     | 0 0 0  |  |
| 9 SI | 1 | 1.6577 | 3.1326 | 17 O                                     | 0 0 0  |  |
| 9 SI | 1 | 1.6592 | 3.1355 | 25 O                                     | 0 0 1  |  |
| 9 SI | 1 | 2.9751 | 5.6222 | 1 CA                                     | 0-1 0  |  |
| 9 SI | 1 | 3.0351 | 5.7356 | 8 CA                                     | 0 0 1  |  |
| 13 O | 1 | 1.6167 | 3.0551 | 9 SI                                     | 0 0 0  |  |
| 13 O | 1 | 2.2221 | 4.1991 | 1 CA                                     | 0 0 0  |  |
| 13 O | 1 | 2.3959 | 4.5277 | 8 CA                                     | 0 0 1  |  |
| 13 O | 1 | 2.6757 | 5.0563 | 6 CA                                     | 0 0 0  |  |
| 13 O | 1 | 2.6843 | 5.0725 | 17 O                                     | 0 0 0  |  |
| 13 O | 1 | 2.6881 | 5.0799 | 21 O                                     | 0 0 0  |  |
| 17 O | 1 | 1.6577 | 3.1326 | 9 SI                                     | 0 0 0  |  |
| 17 O | 1 | 2.3803 | 4.4981 | 5 CA                                     | 0 0 0  |  |
| 17 O | 1 | 2.3849 | 4.5068 | 3 CA                                     | 0 0 1  |  |
| 17 O | 1 | 2.5500 | 4.8188 | 1 CA                                     | 0-1 0  |  |
| 17 O | 1 | 2.5839 | 4.8829 | 25 O                                     | 0 0 1  |  |
| 17 O | 1 | 2.6447 | 4.9978 | 6 CA                                     | 0 0 0  |  |
| 21 O | 1 | 1.6445 | 3.1077 | 9 SI                                     | 0 0 0  |  |
| 21 O | 1 | 2.3802 | 4.4979 | 6 CA                                     | 1 0 0  |  |
| 21 O | 1 | 2.3890 | 4.5146 | 5 CA                                     | 1 0 0  |  |
| 21 O | 1 | 2.4617 | 4.6519 | 2 CA                                     | 0 0 0  |  |
| 21 O | 1 | 2.6881 | 5.0799 | 13 O                                     | 0 0 0  |  |
| 21 O | 1 | 2.7072 | 5.1159 | 25 O                                     | 0 0 1  |  |
| 25 O | 1 | 1.6592 | 3.1355 | 9 SI                                     | 0 0-1  |  |
| 25 O | 1 | 2.3376 | 4.4175 | 3 CA                                     | 1 0 0  |  |
| 25 O | 1 | 2.4678 | 4.6635 | 7 CA                                     | 0-1 0  |  |
| 25 O | 1 | 2.5839 | 4.8829 | 17 O                                     | 0 0-1  |  |
| 25 O | 1 | 2.6079 | 4.9282 | 1 CA                                     | 0-1-1  |  |
| 25 O | 1 | 2.6445 | 4.9974 | 8 CA                                     | 0 0 0  |  |

SYMMETRY ALLOWED INTERNAL DEGREE(S) OF FREEDOM: 21

TTTTTTTTTTTTTTTTTTTTTTTTTTTTTTTTTTT SYMM TELAPSE 0.38 TCPU 0.37

TTTTTTTTTTTTTTTTTTTTTTTTTTTTTTTTTTT INT\_SCREEN TELAPSE 0.39 TCPU 0.37

```
*****
*
*
*      FFFFF  RRRR  EEEE  EEE  U  U  EEEE  N  N  CCC  Y  Y
*      F      R  R  E    E  E  U  U  E    NN  N  C    Y  Y
*      FFF    RRRR  EEEE  E  E  U  U  EEEE  N  N  N  C    Y
*      F      R  R  E    E  EE  U  U  E    N  NN  C    Y
*      F      R  R  EEEE  EE  E  UUU  EEEE  N  N  CCC  Y
*
*
*
*  CALCULATION OF PHONON FREQUENCIES AT THE GAMMA POINT.
```

```

*
* SYMMETRY IS EXPLOITED TO BUILD THE TOTAL HESSIAN MATRIX.
* (F. PASCALE PHD THESIS TURIN-PARIS 2002)
*
*****

```

```

*
* REFERENCES TO BE QUOTED WHEN USING THIS MODULE:
*
* F. Pascale, C.M. Zicovich-Wilson, F. Lopez, B. Civalleri
* R. Orlando, R. Dovesi
* The calculation of the vibration frequencies of crystalline
* compounds and its implementation in the CRYSTAL code
* J. Comput. Chem. 25 (2004) 888-897
*
* C.M. Zicovich-Wilson, F. Pascale, C. Roetti, V.R. Saunders,
* R. Orlando, R. Dovesi
* The calculation of the vibration frequencies of alpha-quartz:
* the effect of hamiltonian and basis set
* J. Comput. Chem. 25 (2004) 1873-1881
*****

```

# ATOMS ISOTOPIC MASS (AMU) FOR FREQUENCY CALCULATION

|      |         |       |         |       |         |       |         |
|------|---------|-------|---------|-------|---------|-------|---------|
| 1 CA | 39.9626 | 2 CA  | 39.9626 | 3 CA  | 39.9626 | 4 CA  | 39.9626 |
| 5 CA | 39.9626 | 6 CA  | 39.9626 | 7 CA  | 39.9626 | 8 CA  | 39.9626 |
| 9 SI | 27.9769 | 10 SI | 27.9769 | 11 SI | 27.9769 | 12 SI | 27.9769 |
| 13 O | 15.9949 | 14 O  | 15.9949 | 15 O  | 15.9949 | 16 O  | 15.9949 |
| 17 O | 15.9949 | 18 O  | 15.9949 | 19 O  | 15.9949 | 20 O  | 15.9949 |
| 21 O | 15.9949 | 22 O  | 15.9949 | 23 O  | 15.9949 | 24 O  | 15.9949 |
| 25 O | 15.9949 | 26 O  | 15.9949 | 27 O  | 15.9949 | 28 O  | 15.9949 |

STEP SIZE 0.0030 ANGSTROM

INFORMATION CONCERNING THE SCF+GRADIENT CALCULATIONS REQUIRED FOR GENERATING FREQUENCIES. IN PRINCIPLE 3N+1 SCF + GRADIENT CALCULATIONS ARE REQUIRED; FOR EACH OF THEM THE REMAINING POINT SYMMETRY IS INDICATED. POINT SYMMETRY PERMITS TO GENERATE GRADIENTS FOR DISPLACEMENT B STARTING FROM THE GRADIENT GENERATED BY DISPLACEMENT A.

| N  | LABEL       | SYMBOL   | DISPLACEMENT | SYM. |
|----|-------------|----------|--------------|------|
| 1  | EQUILIBRIUM | GEOMETRY |              | 4    |
| 2  | 1           | CA       | DX           | 1    |
| 3  | 1           | CA       | DY           | 1    |
| 4  | 1           | CA       | DZ           | 1    |
| 5  | 5           | CA       | DX           | 1    |
| 6  | 5           | CA       | DY           | 1    |
| 7  | 5           | CA       | DZ           | 1    |
| 8  | 9           | SI       | DX           | 1    |
| 9  | 9           | SI       | DY           | 1    |
| 10 | 9           | SI       | DZ           | 1    |
| 11 | 13          | O        | DX           | 1    |
| 12 | 13          | O        | DY           | 1    |
| 13 | 13          | O        | DZ           | 1    |
| 14 | 17          | O        | DX           | 1    |
| 15 | 17          | O        | DY           | 1    |
| 16 | 17          | O        | DZ           | 1    |
| 17 | 21          | O        | DX           | 1    |
| 18 | 21          | O        | DY           | 1    |
| 19 | 21          | O        | DZ           | 1    |
| 20 | 25          | O        | DX           | 1    |
| 21 | 25          | O        | DY           | 1    |
| 22 | 25          | O        | DZ           | 1    |

USE OF RESIDUAL SYMMETRY AFTER DISPLACEMENT

NUMERICAL GRADIENT COMPUTED WITH A SINGLE DISPLACEMENT (+dx) FOR EACH CARTESIAN COORDINATE WITH RESPECT TO THE EQUILIBRIUM CONFIGURATION  
dx= 0.003

|                                     |    |
|-------------------------------------|----|
| NUMBER OF IRREDUCIBLE ATOMS         | 7  |
| NUMBER OF SCF+GRADIENT CALCULATIONS | 22 |

| ATOM | SYMOP | ORDER |
|------|-------|-------|
| 1    | 1     | 1     |

|    |   |   |
|----|---|---|
| 5  | 1 | 1 |
| 9  | 1 | 1 |
| 13 | 1 | 1 |
| 17 | 1 | 1 |
| 21 | 1 | 1 |
| 25 | 1 | 1 |

ATOM : IRREDUCIBLE ATOM  
 SYMOP : NUMBER OF SYMMETRY OPERATORS THAT DOESN'T MOVE THE IRREDUCIBLE ATOM  
 ORDER : MAXIMUM ORDER AMONG THE OPERATORS OF THE IRREDUCIBLE ATOM  
 \*\*\*\*\*

GCALCO - MAX INDICES DIRECT LATTICE VECTOR 19 15 11  
 NO.OF VECTORS CREATED 6999 STARS 1862 RMAX 157.41387 BOHR  
 CAPPA:IS1 6;IS2 6;IS3 6; K PTS MONK NET 80; SYMMOPS: K SPACE 4;G SPACE 4  
 TTTTTTTTTTTTTTTTTTTTTTTTTTTTTTTT gordshl TELAPSE 0.42 TCPU 0.41  
 DIMENSIONS P(G)= 389912 F(G)= 195388 P(G),F(G) (IRR) 49967  
 MAX G-VECTOR INDEX FOR 1- AND 2-ELECTRON INTEGRALS 33  
 TTTTTTTTTTTTTTTTTTTTTTTTTTTTTTTT INPUT TELAPSE 0.42 TCPU 0.41  
 SYMMETRY ALLOWED INTERNAL DEGREE(S) OF FREEDOM: 21  
 TTTTTTTTTTTTTTTTTTTTTTTTTTTTTTTT SYMM TELAPSE 0.68 TCPU 0.68  
 TTTTTTTTTTTTTTTTTTTTTTTTTTTTTTTT INT\_SCREEN TELAPSE 0.69 TCPU 0.68  
 INFORMATION \*\*\*\* EXCBUF \*\*\*\* EXCH. BIPO BUFFER: WORDS USED = 0

# DFT PARAMETERS

| ATOM    | ELECTRONS | NET CHARGE | R (ANGSTROM) |
|---------|-----------|------------|--------------|
| 1 20 CA | 20.0000   | 0.0000     | 1.97000000   |
| 9 14 SI | 14.0000   | 0.0000     | 1.17000000   |
| 13 8 O  | 8.0000    | 0.0000     | 0.74000000   |

SIZE OF GRID= 145905  
 TTTTTTTTTTTTTTTTTTTTTTTTTTTTTTTT MAKE\_GRID2 TELAPSE 7.25 TCPU 7.24  
 BECKE WEIGHT FUNCTION  
 RADSAFE = 2.00  
 TOLERANCES - DENSITY:10\*\*- 6; POTENTIAL:10\*\*- 9; GRID WGT:10\*\*-14  
 RADIAL INTEGRATION - INTERVALS (POINTS,UPPER LIMIT): 1( 75, 4.0\*R)  
 ANGULAR INTEGRATION - INTERVALS (ACCURACY LEVEL [N. POINTS] UPPER LIMIT):  
 1( 4[ 86] 0.2) 2( 8[ 194] 0.5) 3( 12[ 350] 0.9) 4( 16[ 974] 3.5)  
 5( 12[ 350]9999.0)  
 TTTTTTTTTTTTTTTTTTTTTTTTTTTTTTTT INT\_CALC TELAPSE 7.28 TCPU 7.27

\*\*\*\*\*  
 Ca2SiO4 cif file  
 CRYSTAL - SCF - TYPE OF CALCULATION : RESTRICTED CLOSED SHELL  
 \*\*\*\*\*  
 CAPPA:IS1 6;IS2 6;IS3 6; K PTS MONK NET 80; SYMMOPS: K SPACE 4;G SPACE 4  
 TTTTTTTTTTTTTTTTTTTTTTTTTTTTTTTT SDIK TELAPSE 8.49 TCPU 8.48  
 AAAAAAAAAAAAAAAAAAAAAAAAAAAAAAAAAAAAAAAAAAAAAAAAAAAAAAAAAAAAAAAAAAAAAA  
 ATOMIC WAVEFUNCTION(S)

|                     |                           |    |    |
|---------------------|---------------------------|----|----|
| NUCLEAR CHARGE 20.0 | SYMMETRY SPECIES          | S  | P  |
| N. ELECTRONS 20.0   | NUMBER OF PRIMITIVE GTOS  | 21 | 13 |
|                     | NUMBER OF CONTRACTED GTOS | 5  | 4  |
|                     | NUMBER OF CLOSED SHELLS   | 4  | 2  |
|                     | OPEN SHELL OCCUPATION     | 0  | 0  |

ZNUC SCFIT TOTAL HF ENERGY KINETIC ENERGY VIRIAL THEOREM ACCURACY  
 20.0 7 -6.759945013E+02 6.789840598E+02 -1.995597012E+00 3.2E-06

|                     |                           |    |    |
|---------------------|---------------------------|----|----|
| NUCLEAR CHARGE 14.0 | SYMMETRY SPECIES          | S  | P  |
| N. ELECTRONS 14.0   | NUMBER OF PRIMITIVE GTOS  | 19 | 11 |
|                     | NUMBER OF CONTRACTED GTOS | 5  | 4  |
|                     | NUMBER OF CLOSED SHELLS   | 3  | 1  |
|                     | OPEN SHELL OCCUPATION     | 0  | 2  |



ZNUC SCFIT TOTAL HF ENERGY KINETIC ENERGY VIRIAL THEOREM ACCURACY  
14.0 10 -2.888271346E+02 2.895266850E+02 -1.997583814E+00 2.8E-06

NUCLEAR CHARGE 8.0 SYMMETRY SPECIES S P  
N. ELECTRONS 8.0 NUMBER OF PRIMITIVE GTOS 14 6  
NUMBER OF CONTRACTED GTOS 4 3  
NUMBER OF CLOSED SHELLS 2 0  
OPEN SHELL OCCUPATION 0 4

ZNUC SCFIT TOTAL HF ENERGY KINETIC ENERGY VIRIAL THEOREM ACCURACY  
8.0 13 -7.480044816E+01 7.461868841E+01 -2.002435848E+00 2.7E-06

AAAAAAAAAAAAAAAAAAAAAAAAAAAAAAAAAAAAAAAAAAAAAAAAAAAAAAAAAAAAAAAAAAAAAAAA

|                                               |                 |         |                |      |          |
|-----------------------------------------------|-----------------|---------|----------------|------|----------|
| TTTTTTTTTTTTTTTTTTTTTTTTTTTTTTTT              | MOQGAD          | TELAPSE | 9.06           | TCPU | 9.05     |
| TTTTTTTTTTTTTTTTTTTTTTTTTTTTTTTT              | SHELLX          | TELAPSE | 11.56          | TCPU | 11.55    |
| TTTTTTTTTTTTTTTTTTTTTTTTTTTTTTTT              | MONMO3          | TELAPSE | 11.90          | TCPU | 11.89    |
| NUMERICALLY INTEGRATED DENSITY 344.0006883459 |                 |         |                |      |          |
| TTTTTTTTTTTTTTTTTTTTTTTTTTTTTTTT              | NUMDFT          | TELAPSE | 12.39          | TCPU | 12.38    |
| CYC 0 ETOT(AU) -7.752307743317E+03            | DETOT -7.75E+03 | tst     | 0.00E+00       | PX   | 1.00E+00 |
| TTTTTTTTTTTTTTTTTTTTTTTTTTTTTTTT              | FDIK            | TELAPSE | 57.81          | TCPU | 57.80    |
| INSULATING STATE - LEVEL SHIFTER 0.60 au      |                 |         |                |      |          |
| TOP OF VALENCE BANDS - BAND                   | 172; K          | 68; EIG | -3.3657655E-01 | AU   |          |
| TOP OF VALENCE BANDS - BAND                   | 172; K          | 1; EIG  | -3.4268257E-01 | AU   |          |
| BOTTOM OF VIRTUAL BANDS - BAND                | 173; K          | 1; EIG  | -5.2645346E-02 | AU   |          |
| TTTTTTTTTTTTTTTTTTTTTTTTTTTTTTTT              | PDIG            | TELAPSE | 58.87          | TCPU | 58.86    |
| TTTTTTTTTTTTTTTTTTTTTTTTTTTTTTTT              | MOQGAD          | TELAPSE | 58.90          | TCPU | 58.88    |
| TTTTTTTTTTTTTTTTTTTTTTTTTTTTTTTT              | SHELLX          | TELAPSE | 61.94          | TCPU | 61.93    |
| TTTTTTTTTTTTTTTTTTTTTTTTTTTTTTTT              | MONMO3          | TELAPSE | 62.29          | TCPU | 62.27    |
| NUMERICALLY INTEGRATED DENSITY 344.0007440116 |                 |         |                |      |          |
| TTTTTTTTTTTTTTTTTTTTTTTTTTTTTTTT              | NUMDFT          | TELAPSE | 63.18          | TCPU | 63.17    |
| CYC 1 ETOT(AU) -7.755363207893E+03            | DETOT -3.06E+00 | tst     | 0.00E+00       | PX   | 1.00E+00 |
| TTTTTTTTTTTTTTTTTTTTTTTTTTTTTTTT              | FDIK            | TELAPSE | 78.75          | TCPU | 78.73    |
| INSULATING STATE - LEVEL SHIFTER 0.60 au      |                 |         |                |      |          |
| TOP OF VALENCE BANDS - BAND                   | 172; K          | 1; EIG  | -6.3583528E-01 | AU   |          |
| BOTTOM OF VIRTUAL BANDS - BAND                | 173; K          | 1; EIG  | 6.1897450E-02  | AU   |          |
| TTTTTTTTTTTTTTTTTTTTTTTTTTTTTTTT              | PDIG            | TELAPSE | 79.81          | TCPU | 79.78    |
| TTTTTTTTTTTTTTTTTTTTTTTTTTTTTTTT              | MOQGAD          | TELAPSE | 79.83          | TCPU | 79.81    |
| TTTTTTTTTTTTTTTTTTTTTTTTTTTTTTTT              | SHELLX          | TELAPSE | 82.85          | TCPU | 82.83    |
| TTTTTTTTTTTTTTTTTTTTTTTTTTTTTTTT              | MONMO3          | TELAPSE | 83.21          | TCPU | 83.19    |
| NUMERICALLY INTEGRATED DENSITY 344.0009159677 |                 |         |                |      |          |
| TTTTTTTTTTTTTTTTTTTTTTTTTTTTTTTT              | NUMDFT          | TELAPSE | 84.08          | TCPU | 84.06    |
| CYC 2 ETOT(AU) -7.757656663868E+03            | DETOT -2.29E+00 | tst     | 2.12E-02       | PX   | 1.67E-01 |
| TTTTTTTTTTTTTTTTTTTTTTTTTTTTTTTT              | FDIK            | TELAPSE | 98.58          | TCPU | 98.23    |
| INSULATING STATE - LEVEL SHIFTER 0.60 au      |                 |         |                |      |          |
| TOP OF VALENCE BANDS - BAND                   | 172; K          | 1; EIG  | -7.0172452E-01 | AU   |          |
| BOTTOM OF VIRTUAL BANDS - BAND                | 173; K          | 1; EIG  | 5.1551244E-02  | AU   |          |
| TTTTTTTTTTTTTTTTTTTTTTTTTTTTTTTT              | PDIG            | TELAPSE | 99.64          | TCPU | 99.29    |
| TTTTTTTTTTTTTTTTTTTTTTTTTTTTTTTT              | MOQGAD          | TELAPSE | 99.67          | TCPU | 99.32    |
| TTTTTTTTTTTTTTTTTTTTTTTTTTTTTTTT              | SHELLX          | TELAPSE | 102.69         | TCPU | 102.34   |
| TTTTTTTTTTTTTTTTTTTTTTTTTTTTTTTT              | MONMO3          | TELAPSE | 103.04         | TCPU | 102.69   |
| NUMERICALLY INTEGRATED DENSITY 344.0008959092 |                 |         |                |      |          |
| TTTTTTTTTTTTTTTTTTTTTTTTTTTTTTTT              | NUMDFT          | TELAPSE | 103.92         | TCPU | 103.57   |
| CYC 3 ETOT(AU) -7.757730758006E+03            | DETOT -7.41E-02 | tst     | 1.59E-03       | PX   | 5.10E-02 |
| TTTTTTTTTTTTTTTTTTTTTTTTTTTTTTTT              | FDIK            | TELAPSE | 117.40         | TCPU | 117.05   |
| INSULATING STATE - LEVEL SHIFTER 0.60 au      |                 |         |                |      |          |
| TOP OF VALENCE BANDS - BAND                   | 172; K          | 1; EIG  | -7.4594343E-01 | AU   |          |
| BOTTOM OF VIRTUAL BANDS - BAND                | 173; K          | 1; EIG  | 3.7226642E-02  | AU   |          |
| TTTTTTTTTTTTTTTTTTTTTTTTTTTTTTTT              | PDIG            | TELAPSE | 118.46         | TCPU | 118.11   |
| TTTTTTTTTTTTTTTTTTTTTTTTTTTTTTTT              | MOQGAD          | TELAPSE | 118.48         | TCPU | 118.13   |
| TTTTTTTTTTTTTTTTTTTTTTTTTTTTTTTT              | SHELLX          | TELAPSE | 121.51         | TCPU | 121.16   |
| TTTTTTTTTTTTTTTTTTTTTTTTTTTTTTTT              | MONMO3          | TELAPSE | 121.86         | TCPU | 121.51   |
| NUMERICALLY INTEGRATED DENSITY 344.0008614976 |                 |         |                |      |          |
| TTTTTTTTTTTTTTTTTTTTTTTTTTTTTTTT              | NUMDFT          | TELAPSE | 122.73         | TCPU | 122.38   |
| CYC 4 ETOT(AU) -7.757780145819E+03            | DETOT -4.94E-02 | tst     | 2.25E-04       | PX   | 3.40E-02 |
| TTTTTTTTTTTTTTTTTTTTTTTTTTTTTTTT              | FDIK            | TELAPSE | 135.47         | TCPU | 135.11   |
| INSULATING STATE - LEVEL SHIFTER 0.60 au      |                 |         |                |      |          |
| TOP OF VALENCE BANDS - BAND                   | 172; K          | 1; EIG  | -7.4515386E-01 | AU   |          |
| BOTTOM OF VIRTUAL BANDS - BAND                | 173; K          | 1; EIG  | 3.6329158E-02  | AU   |          |
| TTTTTTTTTTTTTTTTTTTTTTTTTTTTTTTT              | PDIG            | TELAPSE | 136.52         | TCPU | 136.17   |
| TTTTTTTTTTTTTTTTTTTTTTTTTTTTTTTT              | MOQGAD          | TELAPSE | 136.55         | TCPU | 136.20   |
| TTTTTTTTTTTTTTTTTTTTTTTTTTTTTTTT              | SHELLX          | TELAPSE | 139.57         | TCPU | 139.22   |
| TTTTTTTTTTTTTTTTTTTTTTTTTTTTTTTT              | MONMO3          | TELAPSE | 139.92         | TCPU | 139.57   |
| NUMERICALLY INTEGRATED DENSITY 344.0008562403 |                 |         |                |      |          |
| TTTTTTTTTTTTTTTTTTTTTTTTTTTTTTTT              | NUMDFT          | TELAPSE | 140.80         | TCPU | 140.45   |
| CYC 5 ETOT(AU) -7.757782171810E+03            | DETOT -2.03E-03 | tst     | 2.87E-05       | PX   | 7.03E-03 |
| TTTTTTTTTTTTTTTTTTTTTTTTTTTTTTTT              | FDIK            | TELAPSE | 155.89         | TCPU | 154.47   |
| INSULATING STATE - LEVEL SHIFTER 0.60 au      |                 |         |                |      |          |
| TOP OF VALENCE BANDS - BAND                   | 172; K          | 1; EIG  | -7.4306067E-01 | AU   |          |

|                                                 |  |                |         |                   |      |          |
|-------------------------------------------------|--|----------------|---------|-------------------|------|----------|
| BOTTOM OF VIRTUAL BANDS - BAND                  |  | 173; K         | 1; EIG  | 3.6277538E-02 AU  |      |          |
| TTTTTTTTTTTTTTTTTTTTTTTTTTTTTTTTTTTTTTTT PDIG   |  |                | TELAPSE | 156.94            | TCPU | 155.53   |
| TTTTTTTTTTTTTTTTTTTTTTTTTTTTTTTTTTTTTTTT MOQGAD |  |                | TELAPSE | 156.97            | TCPU | 155.55   |
| TTTTTTTTTTTTTTTTTTTTTTTTTTTTTTTTTTTTTTTT SHELLX |  |                | TELAPSE | 159.99            | TCPU | 158.57   |
| TTTTTTTTTTTTTTTTTTTTTTTTTTTTTTTTTTTTTTTT MONMO3 |  |                | TELAPSE | 160.35            | TCPU | 158.93   |
| NUMERICALLY INTEGRATED DENSITY                  |  | 344.0008574063 |         |                   |      |          |
| TTTTTTTTTTTTTTTTTTTTTTTTTTTTTTTTTTTTTTTT NUMDFT |  |                | TELAPSE | 161.23            | TCPU | 159.81   |
| CYC 6 ETOT(AU) -7.757783150526E+03 DETOT        |  | -9.79E-04      | tst     | 2.27E-05          | PX   | 5.90E-03 |
| TTTTTTTTTTTTTTTTTTTTTTTTTTTTTTTTTTTTTTTT FDIK   |  |                | TELAPSE | 173.02            | TCPU | 171.59   |
| INSULATING STATE - LEVEL SHIFTER                |  | 0.60 au        |         |                   |      |          |
| TOP OF VALENCE BANDS - BAND                     |  | 172; K         | 1; EIG  | -7.4479991E-01 AU |      |          |
| BOTTOM OF VIRTUAL BANDS - BAND                  |  | 173; K         | 1; EIG  | 3.5366494E-02 AU  |      |          |
| TTTTTTTTTTTTTTTTTTTTTTTTTTTTTTTTTTTTTTTT PDIG   |  |                | TELAPSE | 174.09            | TCPU | 172.66   |
| TTTTTTTTTTTTTTTTTTTTTTTTTTTTTTTTTTTTTTTT MOQGAD |  |                | TELAPSE | 174.11            | TCPU | 172.66   |
| TTTTTTTTTTTTTTTTTTTTTTTTTTTTTTTTTTTTTTTT SHELLX |  |                | TELAPSE | 177.14            | TCPU | 175.71   |
| TTTTTTTTTTTTTTTTTTTTTTTTTTTTTTTTTTTTTTTT MONMO3 |  |                | TELAPSE | 177.50            | TCPU | 176.07   |
| NUMERICALLY INTEGRATED DENSITY                  |  | 344.0008568813 |         |                   |      |          |
| TTTTTTTTTTTTTTTTTTTTTTTTTTTTTTTTTTTTTTTT NUMDFT |  |                | TELAPSE | 178.37            | TCPU | 176.94   |
| CYC 7 ETOT(AU) -7.757783293363E+03 DETOT        |  | -1.43E-04      | tst     | 9.05E-06          | PX   | 3.41E-03 |
| TTTTTTTTTTTTTTTTTTTTTTTTTTTTTTTTTTTTTTTT FDIK   |  |                | TELAPSE | 190.97            | TCPU | 189.54   |
| INSULATING STATE - LEVEL SHIFTER                |  | 0.60 au        |         |                   |      |          |
| TOP OF VALENCE BANDS - BAND                     |  | 172; K         | 1; EIG  | -7.4587947E-01 AU |      |          |
| BOTTOM OF VIRTUAL BANDS - BAND                  |  | 173; K         | 1; EIG  | 3.4848394E-02 AU  |      |          |
| TTTTTTTTTTTTTTTTTTTTTTTTTTTTTTTTTTTTTTTT PDIG   |  |                | TELAPSE | 192.02            | TCPU | 190.60   |
| TTTTTTTTTTTTTTTTTTTTTTTTTTTTTTTTTTTTTTTT MOQGAD |  |                | TELAPSE | 192.05            | TCPU | 190.62   |
| TTTTTTTTTTTTTTTTTTTTTTTTTTTTTTTTTTTTTTTT SHELLX |  |                | TELAPSE | 195.07            | TCPU | 193.64   |
| TTTTTTTTTTTTTTTTTTTTTTTTTTTTTTTTTTTTTTTT MONMO3 |  |                | TELAPSE | 195.44            | TCPU | 194.01   |
| NUMERICALLY INTEGRATED DENSITY                  |  | 344.0008562216 |         |                   |      |          |
| TTTTTTTTTTTTTTTTTTTTTTTTTTTTTTTTTTTTTTTT NUMDFT |  |                | TELAPSE | 196.31            | TCPU | 194.88   |
| CYC 8 ETOT(AU) -7.757783356682E+03 DETOT        |  | -6.33E-05      | tst     | 3.72E-06          | PX   | 1.80E-03 |
| TTTTTTTTTTTTTTTTTTTTTTTTTTTTTTTTTTTTTTTT FDIK   |  |                | TELAPSE | 206.58            | TCPU | 202.66   |
| INSULATING STATE - LEVEL SHIFTER                |  | 0.60 au        |         |                   |      |          |
| TOP OF VALENCE BANDS - BAND                     |  | 172; K         | 1; EIG  | -7.4608235E-01 AU |      |          |
| BOTTOM OF VIRTUAL BANDS - BAND                  |  | 173; K         | 1; EIG  | 3.4686577E-02 AU  |      |          |
| TTTTTTTTTTTTTTTTTTTTTTTTTTTTTTTTTTTTTTTT PDIG   |  |                | TELAPSE | 207.64            | TCPU | 203.71   |
| TTTTTTTTTTTTTTTTTTTTTTTTTTTTTTTTTTTTTTTT MOQGAD |  |                | TELAPSE | 207.67            | TCPU | 203.74   |
| TTTTTTTTTTTTTTTTTTTTTTTTTTTTTTTTTTTTTTTT SHELLX |  |                | TELAPSE | 210.69            | TCPU | 206.76   |
| TTTTTTTTTTTTTTTTTTTTTTTTTTTTTTTTTTTTTTTT MONMO3 |  |                | TELAPSE | 211.05            | TCPU | 207.12   |
| NUMERICALLY INTEGRATED DENSITY                  |  | 344.0008560359 |         |                   |      |          |
| TTTTTTTTTTTTTTTTTTTTTTTTTTTTTTTTTTTTTTTT NUMDFT |  |                | TELAPSE | 211.92            | TCPU | 207.99   |
| CYC 9 ETOT(AU) -7.757783374664E+03 DETOT        |  | -1.80E-05      | tst     | 1.87E-06          | PX   | 1.20E-03 |
| TTTTTTTTTTTTTTTTTTTTTTTTTTTTTTTTTTTTTTTT FDIK   |  |                | TELAPSE | 222.19            | TCPU | 218.27   |
| INSULATING STATE - LEVEL SHIFTER                |  | 0.60 au        |         |                   |      |          |
| TOP OF VALENCE BANDS - BAND                     |  | 172; K         | 1; EIG  | -7.4616976E-01 AU |      |          |
| BOTTOM OF VIRTUAL BANDS - BAND                  |  | 173; K         | 1; EIG  | 3.4604658E-02 AU  |      |          |
| TTTTTTTTTTTTTTTTTTTTTTTTTTTTTTTTTTTTTTTT PDIG   |  |                | TELAPSE | 223.25            | TCPU | 219.32   |
| TTTTTTTTTTTTTTTTTTTTTTTTTTTTTTTTTTTTTTTT MOQGAD |  |                | TELAPSE | 223.28            | TCPU | 219.35   |
| TTTTTTTTTTTTTTTTTTTTTTTTTTTTTTTTTTTTTTTT SHELLX |  |                | TELAPSE | 226.30            | TCPU | 222.37   |
| TTTTTTTTTTTTTTTTTTTTTTTTTTTTTTTTTTTTTTTT MONMO3 |  |                | TELAPSE | 226.66            | TCPU | 222.73   |
| NUMERICALLY INTEGRATED DENSITY                  |  | 344.0008559791 |         |                   |      |          |
| TTTTTTTTTTTTTTTTTTTTTTTTTTTTTTTTTTTTTTTT NUMDFT |  |                | TELAPSE | 227.54            | TCPU | 223.61   |
| CYC 10 ETOT(AU) -7.757783381372E+03 DETOT       |  | -6.71E-06      | tst     | 9.40E-07          | PX   | 8.17E-04 |
| TTTTTTTTTTTTTTTTTTTTTTTTTTTTTTTTTTTTTTTT FDIK   |  |                | TELAPSE | 236.75            | TCPU | 232.81   |
| INSULATING STATE - LEVEL SHIFTER                |  | 0.60 au        |         |                   |      |          |
| TOP OF VALENCE BANDS - BAND                     |  | 172; K         | 1; EIG  | -7.4626916E-01 AU |      |          |
| BOTTOM OF VIRTUAL BANDS - BAND                  |  | 173; K         | 1; EIG  | 3.4544574E-02 AU  |      |          |
| TTTTTTTTTTTTTTTTTTTTTTTTTTTTTTTTTTTTTTTT PDIG   |  |                | TELAPSE | 237.80            | TCPU | 233.86   |
| TTTTTTTTTTTTTTTTTTTTTTTTTTTTTTTTTTTTTTTT MOQGAD |  |                | TELAPSE | 237.83            | TCPU | 233.89   |
| TTTTTTTTTTTTTTTTTTTTTTTTTTTTTTTTTTTTTTTT SHELLX |  |                | TELAPSE | 240.84            | TCPU | 236.91   |
| TTTTTTTTTTTTTTTTTTTTTTTTTTTTTTTTTTTTTTTT MONMO3 |  |                | TELAPSE | 241.21            | TCPU | 237.27   |
| NUMERICALLY INTEGRATED DENSITY                  |  | 344.0008559215 |         |                   |      |          |
| TTTTTTTTTTTTTTTTTTTTTTTTTTTTTTTTTTTTTTTT NUMDFT |  |                | TELAPSE | 242.09            | TCPU | 238.15   |
| CYC 11 ETOT(AU) -7.757783383892E+03 DETOT       |  |                |         |                   |      |          |

|                                                               |                 |         |          |      |          |
|---------------------------------------------------------------|-----------------|---------|----------|------|----------|
| TTTTTTTTTTTTTTTTTTTTTTTTTTTTTTTTTTTTTTTT                      | MOQGAD          | TELAPSE | 267.48   | TCPU | 263.54   |
| TTTTTTTTTTTTTTTTTTTTTTTTTTTTTTTTTTTTTTTT                      | SHELLX          | TELAPSE | 270.51   | TCPU | 266.57   |
| TTTTTTTTTTTTTTTTTTTTTTTTTTTTTTTTTTTTTTTT                      | MONMO3          | TELAPSE | 270.85   | TCPU | 266.91   |
| NUMERICALLY INTEGRATED DENSITY 344.0008558572                 |                 |         |          |      |          |
| TTTTTTTTTTTTTTTTTTTTTTTTTTTTTTTTTTTTTTTT                      | NUMDFT          | TELAPSE | 271.73   | TCPU | 267.79   |
| CYC 13 ETOT(AU) -7.757783385152E+03                           | DETOT -3.04E-07 | tst     | 1.21E-07 | PX   | 2.12E-04 |
| TTTTTTTTTTTTTTTTTTTTTTTTTTTTTTTTTTTTTTTT                      | FDIK            | TELAPSE | 280.81   | TCPU | 276.87   |
| INSULATING STATE - LEVEL SHIFTER 0.60 au                      |                 |         |          |      |          |
| TOP OF VALENCE BANDS - BAND 172; K 1; EIG -7.4637080E-01 AU   |                 |         |          |      |          |
| BOTTOM OF VIRTUAL BANDS - BAND 173; K 1; EIG 3.4485961E-02 AU |                 |         |          |      |          |
| TTTTTTTTTTTTTTTTTTTTTTTTTTTTTTTTTTTTTTTT                      | PDIG            | TELAPSE | 281.87   | TCPU | 277.93   |
| TTTTTTTTTTTTTTTTTTTTTTTTTTTTTTTTTTTTTTTT                      | MOQGAD          | TELAPSE | 281.89   | TCPU | 277.95   |
| TTTTTTTTTTTTTTTTTTTTTTTTTTTTTTTTTTTTTTTT                      | SHELLX          | TELAPSE | 284.91   | TCPU | 280.97   |
| TTTTTTTTTTTTTTTTTTTTTTTTTTTTTTTTTTTTTTTT                      | MONMO3          | TELAPSE | 285.27   | TCPU | 281.33   |
| NUMERICALLY INTEGRATED DENSITY 344.0008558434                 |                 |         |          |      |          |
| TTTTTTTTTTTTTTTTTTTTTTTTTTTTTTTTTTTTTTTT                      | NUMDFT          | TELAPSE | 286.14   | TCPU | 282.20   |
| CYC 14 ETOT(AU) -7.757783385233E+03                           | DETOT -8.07E-08 | tst     | 6.81E-08 | PX   | 1.38E-04 |
| TTTTTTTTTTTTTTTTTTTTTTTTTTTTTTTTTTTTTTTT                      | FDIK            | TELAPSE | 295.13   | TCPU | 291.17   |
| INSULATING STATE - LEVEL SHIFTER 0.60 au                      |                 |         |          |      |          |
| TOP OF VALENCE BANDS - BAND 172; K 1; EIG -7.4638129E-01 AU   |                 |         |          |      |          |
| BOTTOM OF VIRTUAL BANDS - BAND 173; K 1; EIG 3.4479894E-02 AU |                 |         |          |      |          |
| TTTTTTTTTTTTTTTTTTTTTTTTTTTTTTTTTTTTTTTT                      | PDIG            | TELAPSE | 296.18   | TCPU | 292.23   |
| TTTTTTTTTTTTTTTTTTTTTTTTTTTTTTTTTTTTTTTT                      | MOQGAD          | TELAPSE | 296.21   | TCPU | 292.25   |
| TTTTTTTTTTTTTTTTTTTTTTTTTTTTTTTTTTTTTTTT                      | SHELLX          | TELAPSE | 299.23   | TCPU | 295.27   |
| TTTTTTTTTTTTTTTTTTTTTTTTTTTTTTTTTTTTTTTT                      | MONMO3          | TELAPSE | 299.58   | TCPU | 295.63   |
| NUMERICALLY INTEGRATED DENSITY 344.0008558340                 |                 |         |          |      |          |
| TTTTTTTTTTTTTTTTTTTTTTTTTTTTTTTTTTTTTTTT                      | NUMDFT          | TELAPSE | 300.45   | TCPU | 296.49   |
| CYC 15 ETOT(AU) -7.757783385238E+03                           | DETOT -4.89E-09 | tst     | 3.83E-08 | PX   | 9.21E-05 |
| TTTTTTTTTTTTTTTTTTTTTTTTTTTTTTTTTTTTTTTT                      | FDIK            | TELAPSE | 309.59   | TCPU | 305.64   |
| INSULATING STATE - LEVEL SHIFTER 0.60 au                      |                 |         |          |      |          |
| TOP OF VALENCE BANDS - BAND 172; K 1; EIG -7.4638796E-01 AU   |                 |         |          |      |          |
| BOTTOM OF VIRTUAL BANDS - BAND 173; K 1; EIG 3.4476073E-02 AU |                 |         |          |      |          |
| TTTTTTTTTTTTTTTTTTTTTTTTTTTTTTTTTTTTTTTT                      | PDIG            | TELAPSE | 310.65   | TCPU | 306.69   |
| TTTTTTTTTTTTTTTTTTTTTTTTTTTTTTTTTTTTTTTT                      | MOQGAD          | TELAPSE | 310.68   | TCPU | 306.72   |
| TTTTTTTTTTTTTTTTTTTTTTTTTTTTTTTTTTTTTTTT                      | SHELLX          | TELAPSE | 313.69   | TCPU | 309.74   |
| TTTTTTTTTTTTTTTTTTTTTTTTTTTTTTTTTTTTTTTT                      | MONMO3          | TELAPSE | 314.05   | TCPU | 310.09   |
| NUMERICALLY INTEGRATED DENSITY 344.0008558277                 |                 |         |          |      |          |
| TTTTTTTTTTTTTTTTTTTTTTTTTTTTTTTTTTTTTTTT                      | NUMDFT          | TELAPSE | 314.94   | TCPU | 310.98   |
| CYC 16 ETOT(AU) -7.757783385218E+03                           | DETOT 1.99E-08  | tst     | 2.16E-08 | PX   | 6.07E-05 |
| TTTTTTTTTTTTTTTTTTTTTTTTTTTTTTTTTTTTTTTT                      | FDIK            | TELAPSE | 323.32   | TCPU | 319.37   |
| INSULATING STATE - LEVEL SHIFTER 0.60 au                      |                 |         |          |      |          |
| TOP OF VALENCE BANDS - BAND 172; K 1; EIG -7.4639214E-01 AU   |                 |         |          |      |          |
| BOTTOM OF VIRTUAL BANDS - BAND 173; K 1; EIG 3.4473665E-02 AU |                 |         |          |      |          |
| TTTTTTTTTTTTTTTTTTTTTTTTTTTTTTTTTTTTTTTT                      | PDIG            | TELAPSE | 324.38   | TCPU | 320.42   |
| TTTTTTTTTTTTTTTTTTTTTTTTTTTTTTTTTTTTTTTT                      | MOQGAD          | TELAPSE | 324.41   | TCPU | 320.45   |
| TTTTTTTTTTTTTTTTTTTTTTTTTTTTTTTTTTTTTTTT                      | SHELLX          | TELAPSE | 327.43   | TCPU | 323.47   |
| TTTTTTTTTTTTTTTTTTTTTTTTTTTTTTTTTTTTTTTT                      | MONMO3          | TELAPSE | 327.79   | TCPU | 323.83   |
| NUMERICALLY INTEGRATED DENSITY 344.0008558238                 |                 |         |          |      |          |
| TTTTTTTTTTTTTTTTTTTTTTTTTTTTTTTTTTTTTTTT                      | NUMDFT          | TELAPSE | 328.67   | TCPU | 324.71   |
| CYC 17 ETOT(AU) -7.757783385198E+03                           | DETOT 1.97E-08  | tst     | 1.22E-08 | PX   | 4.07E-05 |
| TTTTTTTTTTTTTTTTTTTTTTTTTTTTTTTTTTTTTTTT                      | FDIK            | TELAPSE | 337.36   | TCPU | 333.40   |
| INSULATING STATE - LEVEL SHIFTER 0.60 au                      |                 |         |          |      |          |
| TOP OF VALENCE BANDS - BAND 172; K 1; EIG -7.4639484E-01 AU   |                 |         |          |      |          |
| BOTTOM OF VIRTUAL BANDS - BAND 173; K 1; EIG 3.4472140E-02 AU |                 |         |          |      |          |
| TTTTTTTTTTTTTTTTTTTTTTTTTTTTTTTTTTTTTTTT                      | PDIG            | TELAPSE | 338.42   | TCPU | 334.46   |
| TTTTTTTTTTTTTTTTTTTTTTTTTTTTTTTTTTTTTTTT                      | MOQGAD          | TELAPSE | 338.44   | TCPU | 334.49   |
| TTTTTTTTTTTTTTTTTTTTTTTTTTTTTTTTTTTTTTTT                      | SHELLX          | TELAPSE | 341.47   | TCPU | 337.51   |
| TTTTTTTTTTTTTTTTTTTTTTTTTTTTTTTTTTTTTTTT                      | MONMO3          | TELAPSE | 341.82   | TCPU | 337.86   |
| NUMERICALLY INTEGRATED DENSITY 344.0008558210                 |                 |         |          |      |          |
| TTTTTTTTTTTTTTTTTTTTTTTTTTTTTTTTTTTTTTTT                      | NUMDFT          | TELAPSE | 342.69   | TCPU | 338.74   |
| CYC 18 ETOT(AU) -7.757783385180E+03                           | DETOT 1.86E-08  | tst     | 6.86E-09 | PX   | 2.70E-05 |
| TTTTTTTTTTTTTTTTTTTTTTTTTTTTTTTTTTTTTTTT                      | FDIK            | TELAPSE | 351.29   | TCPU | 347.33   |
| INSULATING STATE - LEVEL SHIFTER 0.60 au                      |                 |         |          |      |          |
| TOP OF VALENCE BANDS - BAND 172; K 1; EIG -7.4639654E-01 AU   |                 |         |          |      |          |
| BOTTOM OF VIRTUAL BANDS - BAND 173; K 1; EIG 3.4471160E-02 AU |                 |         |          |      |          |
| TTTTTTTTTTTTTTTTTTTTTTTTTTTTTTTTTTTTTTTT                      | PDIG            | TELAPSE | 352.34   | TCPU | 348.38   |
| TTTTTTTTTTTTTTTTTTTTTTTTTTTTTTTTTTTTTTTT                      | MOQGAD          | TELAPSE | 352.37   | TCPU | 348.41   |
| TTTTTTTTTTTTTTTTTTTTTTTTTTTTTTTTTTTTTTTT                      | SHELLX          | TELAPSE | 355.39   | TCPU | 351.43   |
| TTTTTTTTTTTTTTTTTTTTTTTTTTTTTTTTTTTTTTTT                      | MONMO3          | TELAPSE | 355.75   | TCPU | 351.79   |
| NUMERICALLY INTEGRATED DENSITY 344.0008558193                 |                 |         |          |      |          |
| TTTTTTTTTTTTTTTTTTTTTTTTTTTTTTTTTTTTTTTT                      | NUMDFT          | TELAPSE | 356.61   | TCPU | 352.65   |
| CYC 19 ETOT(AU) -7.757783385166E+03                           | DETOT 1.33E-08  | tst     | 3.87E-09 | PX   | 1.82E-05 |
| TTTTTTTTTTTTTTTTTTTTTTTTTTTTTTTTTTTTTTTT                      | FDIK            | TELAPSE | 365.06   | TCPU | 361.10   |
| INSULATING STATE - LEVEL SHIFTER 0.60 au                      |                 |         |          |      |          |
| TOP OF VALENCE BANDS - BAND 172; K 1; EIG -7.4639767E-01 AU   |                 |         |          |      |          |
| BOTTOM OF VIRTUAL BANDS - BAND 173; K 1; EIG 3.4470514E-02 AU |                 |         |          |      |          |
| TTTTTTTTTTTTTTTTTTTTTTTTTTTTTTTTTTTTTTTT                      | PDIG            | TELAPSE | 366.11   | TCPU | 362.16   |
| TTTTTTTTTTTTTTTTTTTTTTTTTTTTTTTTTTTTTTTT                      | MOQGAD          | TELAPSE | 366.14   | TCPU | 362.18   |
| TTTTTTTTTTTTTTTTTTTTTTTTTTTTTTTTTTTTTTTT                      | SHELLX          | TELAPSE | 369.16   | TCPU | 365.20   |

|                                       |                |          |                |          |             |
|---------------------------------------|----------------|----------|----------------|----------|-------------|
| TTTTTTTTTTTTTTTTTTTTTTTTTTTTTTTTTTTTT | MONMO3         | TELAPSE  | 369.51         | TCPU     | 365.56      |
| NUMERICALLY INTEGRATED DENSITY        | 344.0008558181 |          |                |          |             |
| TTTTTTTTTTTTTTTTTTTTTTTTTTTTTTTTTTTTT | NUMDFT         | TELAPSE  | 370.39         | TCPU     | 366.43      |
| CYC 20 ETOT(AU) -7.57783385157E+03    | DETOT          | 9.08E-09 | tst            | 2.19E-09 | PX 1.21E-05 |
| TTTTTTTTTTTTTTTTTTTTTTTTTTTTTTTTTTTTT | FDIK           | TELAPSE  | 378.70         | TCPU     | 374.74      |
| INSULATING STATE - LEVEL SHIFTER      | 0.60 au        |          |                |          |             |
| TOP OF VALENCE BANDS - BAND           | 172; K         | 1; EIG   | -7.4639842E-01 | AU       |             |
| BOTTOM OF VIRTUAL BANDS - BAND        | 173; K         | 1; EIG   | 3.4470091E-02  | AU       |             |
| TTTTTTTTTTTTTTTTTTTTTTTTTTTTTTTTTTTTT | PDIG           | TELAPSE  | 379.75         | TCPU     | 375.79      |
| TTTTTTTTTTTTTTTTTTTTTTTTTTTTTTTTTTTTT | MOQGAD         | TELAPSE  | 379.78         | TCPU     | 375.82      |
| TTTTTTTTTTTTTTTTTTTTTTTTTTTTTTTTTTTTT | SHELLX         | TELAPSE  | 382.80         | TCPU     | 378.84      |
| TTTTTTTTTTTTTTTTTTTTTTTTTTTTTTTTTTTTT | MONMO3         | TELAPSE  | 383.16         | TCPU     | 379.20      |
| NUMERICALLY INTEGRATED DENSITY        | 344.0008558173 |          |                |          |             |
| TTTTTTTTTTTTTTTTTTTTTTTTTTTTTTTTTTTTT | NUMDFT         | TELAPSE  | 384.03         | TCPU     | 380.0       |
| CYC 21 ETOT(AU) -7.757783385150E+03   | DETOT          | 6.87E-09 | tst            | 1.24E-09 | PX 8.24E-06 |
| TTTTTTTTTTTTTTTTTTTTTTTTTTTTTTTTTTTTT | FDIK           | TELAPSE  | 392.43         | TCPU     | 388.47      |
| INSULATING STATE - LEVEL SHIFTER      | 0.60 au        |          |                |          |             |
| TOP OF VALENCE BANDS - BAND           | 172; K         | 1; EIG   | -7.4639892E-01 | AU       |             |
| BOTTOM OF VIRTUAL BANDS - BAND        | 173; K         | 1; EIG   | 3.4469811E-02  | AU       |             |
| TTTTTTTTTTTTTTTTTTTTTTTTTTTTTTTTTTTTT | PDIG           | TELAPSE  | 393.49         | TCPU     | 389.53      |
| TTTTTTTTTTTTTTTTTTTTTTTTTTTTTTTTTTTTT | MOQGAD         | TELAPSE  | 393.51         | TCPU     | 389.55      |
| TTTTTTTTTTTTTTTTTTTTTTTTTTTTTTTTTTTTT | SHELLX         | TELAPSE  | 396.54         | TCPU     | 392.58      |
| TTTTTTTTTTTTTTTTTTTTTTTTTTTTTTTTTTTTT | MONMO3         | TELAPSE  | 396.89         | TCPU     | 392.93      |
| NUMERICALLY INTEGRATED DENSITY        | 344.0008558168 |          |                |          |             |
| TTTTTTTTTTTTTTTTTTTTTTTTTTTTTTTTTTTTT | NUMDFT         | TELAPSE  | 397.76         | TCPU     | 393.80      |
| CYC 22 ETOT(AU) -7.757783385146E+03   | DETOT          | 4.00E-09 | tst            | 6.99E-10 | PX 5.56E-06 |
| TTTTTTTTTTTTTTTTTTTTTTTTTTTTTTTTTTTTT | FDIK           | TELAPSE  | 405.75         | TCPU     | 401.79      |
| INSULATING STATE - LEVEL SHIFTER      | 0.60 au        |          |                |          |             |
| TOP OF VALENCE BANDS - BAND           | 172; K         | 1; EIG   | -7.4639924E-01 | AU       |             |
| BOTTOM OF VIRTUAL BANDS - BAND        | 173; K         | 1; EIG   | 3.4469628E-02  | AU       |             |
| TTTTTTTTTTTTTTTTTTTTTTTTTTTTTTTTTTTTT | PDIG           | TELAPSE  | 406.81         | TCPU     | 402.85      |
| TTTTTTTTTTTTTTTTTTTTTTTTTTTTTTTTTTTTT | MOQGAD         | TELAPSE  | 406.83         | TCPU     | 402.88      |
| TTTTTTTTTTTTTTTTTTTTTTTTTTTTTTTTTTTTT | SHELLX         | TELAPSE  | 409.86         | TCPU     | 405.90      |
| TTTTTTTTTTTTTTTTTTTTTTTTTTTTTTTTTTTTT | MONMO3         | TELAPSE  | 410.21         | TCPU     | 406.25      |
| NUMERICALLY INTEGRATED DENSITY        | 344.0008558164 |          |                |          |             |
| TTTTTTTTTTTTTTTTTTTTTTTTTTTTTTTTTTTTT | NUMDFT         | TELAPSE  | 411.09         | TCPU     | 407.13      |
| CYC 23 ETOT(AU) -7.757783385144E+03   | DETOT          | 2.82E-09 | tst            | 3.95E-10 | PX 3.79E-06 |
| TTTTTTTTTTTTTTTTTTTTTTTTTTTTTTTTTTTTT | FDIK           | TELAPSE  | 419.17         | TCPU     | 415.22      |
| INSULATING STATE - LEVEL SHIFTER      | 0.60 au        |          |                |          |             |
| TOP OF VALENCE BANDS - BAND           | 172; K         | 1; EIG   | -7.4639946E-01 | AU       |             |
| BOTTOM OF VIRTUAL BANDS - BAND        | 173; K         | 1; EIG   | 3.4469504E-02  | AU       |             |
| TTTTTTTTTTTTTTTTTTTTTTTTTTTTTTTTTTTTT | PDIG           | TELAPSE  | 420.23         | TCPU     | 416.27      |
| TTTTTTTTTTTTTTTTTTTTTTTTTTTTTTTTTTTTT | MOQGAD         | TELAPSE  | 420.26         | TCPU     | 416.30      |
| TTTTTTTTTTTTTTTTTTTTTTTTTTTTTTTTTTTTT | SHELLX         | TELAPSE  | 423.28         | TCPU     | 419.32      |
| TTTTTTTTTTTTTTTTTTTTTTTTTTTTTTTTTTTTT | MONMO3         | TELAPSE  | 423.63         | TCPU     | 419.67      |
| NUMERICALLY INTEGRATED DENSITY        | 344.0008558162 |          |                |          |             |
| TTTTTTTTTTTTTTTTTTTTTTTTTTTTTTTTTTTTT | NUMDFT         | TELAPSE  | 424.50         | TCPU     | 420.54      |
| CYC 24 ETOT(AU) -7.757783385142E+03   | DETOT          | 1.76E-09 | tst            | 2.24E-10 | PX 2.59E-06 |
| TTTTTTTTTTTTTTTTTTTTTTTTTTTTTTTTTTTTT | FDIK           | TELAPSE  | 430.97         | TCPU     | 427.01      |
| INSULATING STATE - LEVEL SHIFTER      | 0.60 au        |          |                |          |             |
| TOP OF VALENCE BANDS - BAND           | 172; K         | 1; EIG   | -7.4639961E-01 | AU       |             |
| BOTTOM OF VIRTUAL BANDS - BAND        | 173; K         | 1; EIG   | 3.4469421E-02  | AU       |             |
| TTTTTTTTTTTTTTTTTTTTTTTTTTTTTTTTTTTTT | PDIG           | TELAPSE  | 432.06         | TCPU     | 428.10      |
| TTTTTTTTTTTTTTTTTTTTTTTTTTTTTTTTTTTTT | MOQGAD         | TELAPSE  | 432.09         | TCPU     | 428.13      |
| TTTTTTTTTTTTTTTTTTTTTTTTTTTTTTTTTTTTT | SHELLX         | TELAPSE  | 435.14         | TCPU     | 431.18      |
| TTTTTTTTTTTTTTTTTTTTTTTTTTTTTTTTTTTTT | MONMO3         | TELAPSE  | 435.49         | TCPU     | 431.53      |
| NUMERICALLY INTEGRATED DENSITY        | 344.0008558161 |          |                |          |             |
| TTTTTTTTTTTTTTTTTTTTTTTTTTTTTTTTTTTTT | NUMDFT         | TELAPSE  | 436.36         | TCPU     | 432.40      |
| CYC 25 ETOT(AU) -7.757783385141E+03   | DETOT          | 1.21E-09 | tst            | 1.27E-10 | PX 1.76E-06 |
| TTTTTTTTTTTTTTTTTTTTTTTTTTTTTTTTTTTTT | FDIK           | TELAPSE  | 442.40         | TCPU     | 438.44      |
| INSULATING STATE - LEVEL SHIFTER      | 0.60 au        |          |                |          |             |
| TOP OF VALENCE BANDS - BAND           | 172; K         | 1; EIG   | -7.4639972E-01 | AU       |             |
| BOTTOM OF VIRTUAL BANDS - BAND        | 173; K         | 1; EIG   | 3.4469363E-02  | AU       |             |
| TTTTTTTTTTTTTTTTTTTTTTTTTTTTTTTTTTTTT | PDIG           | TELAPSE  | 443.45         | TCPU     | 439.49      |
| TTTTTTTTTTTTTTTTTTTTTTTTTTTTTTTTTTTTT | MOQGAD         | TELAPSE  | 443.48         | TC       |             |

```

TTTTTTTTTTTTTTTTTTTTTTTTTTTTTTTTTTTTT NUMDFT          TELAPSE          459.50 TCPU          455.54
CYC 27 ETOT(AU) -7.757783385139E+03 DETOT 4.82E-10 tst 4.11E-11 PX 8.15E-07
TTTTTTTTTTTTTTTTTTTTTTTTTTTTTTTTTTTTT FDIK          TELAPSE          465.84 TCPU          461.88
INSULATING STATE - LEVEL SHIFTER 0.60 au
TOP OF VALENCE BANDS - BAND 172; K 1; EIG -7.4639984E-01 AU
BOTTOM OF VIRTUAL BANDS - BAND 173; K 1; EIG 3.4469305E-02 AU
TTTTTTTTTTTTTTTTTTTTTTTTTTTTTTTTTTTTT PDIG          TELAPSE          466.89 TCPU          462.93
TTTTTTTTTTTTTTTTTTTTTTTTTTTTTTTTTTTTT MOQGAD         TELAPSE          466.92 TCPU          462.96
TTTTTTTTTTTTTTTTTTTTTTTTTTTTTTTTTTTTT SHELLX         TELAPSE          469.94 TCPU          465.98
TTTTTTTTTTTTTTTTTTTTTTTTTTTTTTTTTTTTT MONMO3         TELAPSE          470.30 TCPU          466.34
NUMERICALLY INTEGRATED DENSITY 344.0008558158
TTTTTTTTTTTTTTTTTTTTTTTTTTTTTTTTTTTTT NUMDFT          TELAPSE          471.17 TCPU          467.21
CYC 28 ETOT(AU) -7.757783385139E+03 DETOT 2.37E-10 tst 2.34E-11 PX 5.70E-07
TTTTTTTTTTTTTTTTTTTTTTTTTTTTTTTTTTTTT FDIK          TELAPSE          477.18 TCPU          473.22
INSULATING STATE - LEVEL SHIFTER 0.60 au
TOP OF VALENCE BANDS - BAND 172; K 1; EIG -7.4639987E-01 AU
BOTTOM OF VIRTUAL BANDS - BAND 173; K 1; EIG 3.4469289E-02 AU
TTTTTTTTTTTTTTTTTTTTTTTTTTTTTTTTTTTTT PDIG          TELAPSE          478.25 TCPU          474.29
TTTTTTTTTTTTTTTTTTTTTTTTTTTTTTTTTTTTT MOQGAD         TELAPSE          478.28 TCPU          474.32
TTTTTTTTTTTTTTTTTTTTTTTTTTTTTTTTTTTTT SHELLX         TELAPSE          481.32 TCPU          477.36
TTTTTTTTTTTTTTTTTTTTTTTTTTTTTTTTTTTTT MONMO3         TELAPSE          481.67 TCPU          477.71
NUMERICALLY INTEGRATED DENSITY 344.0008558158
TTTTTTTTTTTTTTTTTTTTTTTTTTTTTTTTTTTTT NUMDFT          TELAPSE          482.56 TCPU          478.60
CYC 29 ETOT(AU) -7.757783385139E+03 DETOT 2.29E-10 tst 1.34E-11 PX 3.92E-07
TTTTTTTTTTTTTTTTTTTTTTTTTTTTTTTTTTTTT FDIK          TELAPSE          488.50 TCPU          484.54
INSULATING STATE - LEVEL SHIFTER 0.60 au
TOP OF VALENCE BANDS - BAND 172; K 1; EIG -7.4639990E-01 AU
BOTTOM OF VIRTUAL BANDS - BAND 173; K 1; EIG 3.4469275E-02 AU
TTTTTTTTTTTTTTTTTTTTTTTTTTTTTTTTTTTTT PDIG          TELAPSE          489.61 TCPU          485.65
TTTTTTTTTTTTTTTTTTTTTTTTTTTTTTTTTTTTT MOQGAD         TELAPSE          489.64 TCPU          485.68
TTTTTTTTTTTTTTTTTTTTTTTTTTTTTTTTTTTTT SHELLX         TELAPSE          492.69 TCPU          488.73
TTTTTTTTTTTTTTTTTTTTTTTTTTTTTTTTTTTTT MONMO3         TELAPSE          493.03 TCPU          489.07
NUMERICALLY INTEGRATED DENSITY 344.0008558158
TTTTTTTTTTTTTTTTTTTTTTTTTTTTTTTTTTTTT NUMDFT          TELAPSE          493.92 TCPU          489.96
CYC 30 ETOT(AU) -7.757783385139E+03 DETOT 1.45E-10 tst 7.60E-12 PX 2.64E-07
TTTTTTTTTTTTTTTTTTTTTTTTTTTTTTTTTTTTT FDIK          TELAPSE          500.25 TCPU          496.29
INSULATING STATE - LEVEL SHIFTER 0.60 au
TOP OF VALENCE BANDS - BAND 172; K 1; EIG -7.4639992E-01 AU
BOTTOM OF VIRTUAL BANDS - BAND 173; K 1; EIG 3.4469266E-02 AU
TTTTTTTTTTTTTTTTTTTTTTTTTTTTTTTTTTTTT PDIG          TELAPSE          501.31 TCPU          497.35
TTTTTTTTTTTTTTTTTTTTTTTTTTTTTTTTTTTTT MOQGAD         TELAPSE          501.33 TCPU          497.38
TTTTTTTTTTTTTTTTTTTTTTTTTTTTTTTTTTTTT SHELLX         TELAPSE          504.37 TCPU          500.41
TTTTTTTTTTTTTTTTTTTTTTTTTTTTTTTTTTTTT MONMO3         TELAPSE          504.72 TCPU          500.76
NUMERICALLY INTEGRATED DENSITY 344.0008558158
TTTTTTTTTTTTTTTTTTTTTTTTTTTTTTTTTTTTT NUMDFT          TELAPSE          505.59 TCPU          501.63
CYC 31 ETOT(AU) -7.757783385139E+03 DETOT 1.23E-10 tst 4.33E-12 PX 1.80E-07
TTTTTTTTTTTTTTTTTTTTTTTTTTTTTTTTTTTTT FDIK          TELAPSE          511.40 TCPU          507.44
INSULATING STATE - LEVEL SHIFTER 0.60 au
TOP OF VALENCE BANDS - BAND 172; K 1; EIG -7.4639993E-01 AU
BOTTOM OF VIRTUAL BANDS - BAND 173; K 1; EIG 3.4469262E-02 AU
TTTTTTTTTTTTTTTTTTTTTTTTTTTTTTTTTTTTT PDIG          TELAPSE          512.46 TCPU          508.50
TTTTTTTTTTTTTTTTTTTTTTTTTTTTTTTTTTTTT MOQGAD         TELAPSE          512.48 TCPU          508.52
TTTTTTTTTTTTTTTTTTTTTTTTTTTTTTTTTTTTT SHELLX         TELAPSE          515.51 TCPU          511.55
TTTTTTTTTTTTTTTTTTTTTTTTTTTTTTTTTTTTT MONMO3         TELAPSE          515.86 TCPU          511.90
NUMERICALLY INTEGRATED DENSITY 344.0008558157
TTTTTTTTTTTTTTTTTTTTTTTTTTTTTTTTTTTTT NUMDFT          TELAPSE          516.73 TCPU          512.77
CYC 32 ETOT(AU) -7.757783385138E+03 DETOT 7.28E-11 tst 2.47E-12 PX 1.29E-07
TTTTTTTTTTTTTTTTTTTTTTTTTTTTTTTTTTTTT FDIK          TELAPSE          522.35 TCPU          518.39
INSULATING STATE - LEVEL SHIFTER 0.60 au
TOP OF VALENCE BANDS - BAND 172; K 1; EIG -7.4639993E-01 AU
BOTTOM OF VIRTUAL BANDS - BAND 173; K 1; EIG 3.4469260E-02 AU
TTTTTTTTTTTTTTTTTTTTTTTTTTTTTTTTTTTTT PDIG          TELAPSE          523.41 TCPU          519.45
TTTTTTTTTTTTTTTTTTTTTTTTTTTTTTTTTTTTT MOQGAD         TELAPSE          523.43 TCPU          519.47
TTTTTTTTTTTTTTTTTTTTTTTTTTTTTTTTTTTTT SHELLX         TELAPSE          526.47 TCPU          522.51
::: PSEUDO TOTAL ENERGY -7.2729486318120E+03
::: VIRIAL COEFFICIENT 1.0321311011979E+00
TTTTTTTTTTTTTTTTTTTTTTTTTTTTTTTTTTTTT MONMO3         TELAPSE          526.82 TCPU          522.86
NUMERICALLY INTEGRATED DENSITY 344.0008558157
TTTTTTTTTTTTTTTTTTTTTTTTTTTTTTTTTTTTT NUMDFT          TELAPSE          527.68 TCPU          523.72
CYC 33 ETOT(AU) -7.757783385138E+03 DETOT 4.37E-11 tst 1.41E-12 PX 1.29E-07

```

== SCF ENDED - CONVERGENCE ON ENERGY E(AU) -7.7577833851384E+03 CYCLES 33

ENERGY EXPRESSION=HARTREE+FOCK EXCH\*0.00000+(LDA EXCH)\*1.00000+VWN CORR

```

TOTAL ENERGY(DFT) (AU) ( 33) -7.7577833851384E+03 DE 4.4E-11 tester 1.4E-12
TTTTTTTTTTTTTTTTTTTTTTTTTTTTTTTTTTTTT EDFT          TELAPSE          527.69 TCPU          523.73

```





|     |    |            |          |         |       |     |       |   |
|-----|----|------------|----------|---------|-------|-----|-------|---|
| 11- | 11 | 0.4546E-06 | 147.9712 | 4.4361  | (BU ) | A ( | 0.00) | I |
| 12- | 12 | 0.4852E-06 | 152.8855 | 4.5834  | (AG ) | I ( | 0.00) | A |
| 13- | 13 | 0.4887E-06 | 153.4235 | 4.5995  | (BG ) | I ( | 0.00) | A |
| 14- | 14 | 0.5321E-06 | 160.1032 | 4.7998  | (BG ) | I ( | 0.00) | A |
| 15- | 15 | 0.5643E-06 | 164.8685 | 4.9426  | (AG ) | I ( | 0.00) | A |
| 16- | 16 | 0.6166E-06 | 172.3387 | 5.1666  | (BG ) | I ( | 0.00) | A |
| 17- | 17 | 0.6188E-06 | 172.6450 | 5.1758  | (BU ) | A ( | 0.00) | I |
| 18- | 18 | 0.6422E-06 | 175.8747 | 5.2726  | (AG ) | I ( | 0.00) | A |
| 19- | 19 | 0.6679E-06 | 179.3651 | 5.3772  | (AU ) | A ( | 0.00) | I |
| 20- | 20 | 0.7169E-06 | 185.8291 | 5.5710  | (AU ) | A ( | 0.00) | I |
| 21- | 21 | 0.8103E-06 | 197.5586 | 5.9227  | (AG ) | I ( | 0.00) | A |
| 22- | 22 | 0.8169E-06 | 198.3720 | 5.9470  | (BG ) | I ( | 0.00) | A |
| 23- | 23 | 0.8251E-06 | 199.3636 | 5.9768  | (BU ) | A ( | 0.00) | I |
| 24- | 24 | 0.8605E-06 | 203.5862 | 6.1034  | (AG ) | I ( | 0.00) | A |
| 25- | 25 | 0.9472E-06 | 213.6074 | 6.4038  | (BU ) | A ( | 0.00) | I |
| 26- | 26 | 0.9812E-06 | 217.4072 | 6.5177  | (BG ) | I ( | 0.00) | A |
| 27- | 27 | 0.9937E-06 | 218.7831 | 6.5590  | (AU ) | A ( | 0.00) | I |
| 28- | 28 | 0.1059E-05 | 225.8044 | 6.7694  | (AU ) | A ( | 0.00) | I |
| 29- | 29 | 0.1100E-05 | 230.1363 | 6.8993  | (BU ) | A ( | 0.00) | I |
| 30- | 30 | 0.1198E-05 | 240.2116 | 7.2014  | (AG ) | I ( | 0.00) | A |
| 31- | 31 | 0.1277E-05 | 247.9782 | 7.4342  | (BG ) | I ( | 0.00) | A |
| 32- | 32 | 0.1313E-05 | 251.4795 | 7.5392  | (AG ) | I ( | 0.00) | A |
| 33- | 33 | 0.1322E-05 | 252.3780 | 7.5661  | (BU ) | A ( | 0.00) | I |
| 34- | 34 | 0.1366E-05 | 256.5462 | 7.6911  | (BG ) | I ( | 0.00) | A |
| 35- | 35 | 0.1375E-05 | 257.3969 | 7.7166  | (AU ) | A ( | 0.00) | I |
| 36- | 36 | 0.1454E-05 | 264.6186 | 7.9331  | (BU ) | A ( | 0.00) | I |
| 37- | 37 | 0.1468E-05 | 265.8781 | 7.9708  | (AG ) | I ( | 0.00) | A |
| 38- | 38 | 0.1531E-05 | 271.6048 | 8.1425  | (AU ) | A ( | 0.00) | I |
| 39- | 39 | 0.1554E-05 | 273.6134 | 8.2027  | (BG ) | I ( | 0.00) | A |
| 40- | 40 | 0.1568E-05 | 274.8033 | 8.2384  | (AU ) | A ( | 0.00) | I |
| 41- | 41 | 0.1608E-05 | 278.3316 | 8.3442  | (AG ) | I ( | 0.00) | A |
| 42- | 42 | 0.1699E-05 | 286.0507 | 8.5756  | (BG ) | I ( | 0.00) | A |
| 43- | 43 | 0.1699E-05 | 286.0778 | 8.5764  | (BU ) | A ( | 0.00) | I |
| 44- | 44 | 0.1786E-05 | 293.3028 | 8.7930  | (BG ) | I ( | 0.00) | A |
| 45- | 45 | 0.1837E-05 | 297.4590 | 8.9176  | (AU ) | A ( | 0.00) | I |
| 46- | 46 | 0.1907E-05 | 303.0856 | 9.0863  | (AG ) | I ( | 0.00) | A |
| 47- | 47 | 0.2020E-05 | 311.9444 | 9.3519  | (BG ) | I ( | 0.00) | A |
| 48- | 48 | 0.2046E-05 | 313.9130 | 9.4109  | (BU ) | A ( | 0.00) | I |
| 49- | 49 | 0.2625E-05 | 355.6024 | 10.6607 | (AG ) | I ( | 0.00) | A |
| 50- | 50 | 0.2707E-05 | 361.1312 | 10.8264 | (BU ) | A ( | 0.00) | I |
| 51- | 51 | 0.2848E-05 | 370.4070 | 11.1045 | (AU ) | A ( | 0.00) | I |
| 52- | 52 | 0.3001E-05 | 380.2340 | 11.3991 | (AU ) | A ( | 0.00) | I |
| 53- | 53 | 0.3340E-05 | 401.1185 | 12.0252 | (BG ) | I ( | 0.00) | A |
| 54- | 54 | 0.3475E-05 | 409.1040 | 12.2646 | (AG ) | I ( | 0.00) | A |
| 55- | 55 | 0.3528E-05 | 412.2252 | 12.3582 | (BG ) | I ( | 0.00) | A |
| 56- | 56 | 0.3763E-05 | 425.7683 | 12.7642 | (BU ) | A ( | 0.00) | I |
| 57- | 57 | 0.4699E-05 | 475.7407 | 14.2623 | (BU ) | A ( | 0.00) | I |
| 58- | 58 | 0.4761E-05 | 478.8918 | 14.3568 | (AU ) | A ( | 0.00) | I |
| 59- | 59 | 0.5023E-05 | 491.8932 | 14.7466 | (AG ) | I ( | 0.00) | A |
| 60- | 60 | 0.5112E-05 | 496.2041 | 14.8758 | (BU ) | A ( | 0.00) | I |
| 61- | 61 | 0.5166E-05 | 498.8237 | 14.9544 | (AU ) | A ( | 0.00) | I |
| 62- | 62 | 0.5301E-05 | 505.3093 | 15.1488 | (BG ) | I ( | 0.00) | A |
| 63- | 63 | 0.5504E-05 | 514.8988 | 15.4363 | (BG ) | I ( | 0.00) | A |
| 64- | 64 | 0.5565E-05 | 517.7312 | 15.5212 | (AG ) | I ( | 0.00) | A |
| 65- | 65 | 0.5669E-05 | 522.5593 | 15.6659 | (AU ) | A ( | 0.00) | I |
| 66- | 66 | 0.5687E-05 | 523.3729 | 15.6903 | (BU ) | A ( | 0.00) | I |
| 67- | 67 | 0.5911E-05 | 533.5816 | 15.9964 | (AG ) | I ( | 0.00) | A |
| 68- | 68 | 0.6163E-05 | 544.8323 | 16.3337 | (BG ) | I ( | 0.00) | A |
| 69- | 69 | 0.1395E-04 | 819.7798 | 24.5764 | (BU ) | A ( | 0.00) | I |
| 70- | 70 | 0.1403E-04 | 822.1795 | 24.6483 | (AU ) | A ( | 0.00) | I |
| 71- | 71 | 0.1407E-04 | 823.2486 | 24.6804 | (AG ) | I ( | 0.00) | A |
| 72- | 72 | 0.1439E-04 | 832.5324 | 24.9587 | (BG ) | I ( | 0.00) | A |
| 73- | 73 | 0.1445E-04 | 834.3249 | 25.0124 | (AG ) | I ( | 0.00) | A |
| 74- | 74 | 0.1474E-04 | 842.5880 | 25.2602 | (BU ) | A ( | 0.00) | I |
| 75- | 75 | 0.1509E-04 | 852.7031 | 25.5634 | (BG ) | I ( | 0.00) | A |
| 76- | 76 | 0.1535E-04 | 859.8794 | 25.7785 | (AU ) | A ( | 0.00) | I |
| 77- | 77 | 0.1605E-04 | 879.2470 | 26.3592 | (AG ) | I ( | 0.00) | A |
| 78- | 78 | 0.1610E-04 | 880.6863 | 26.4023 | (BU ) | A ( | 0.00) | I |
| 79- | 79 | 0.1676E-04 | 898.5178 | 26.9369 | (BG ) | I ( | 0.00) | A |
| 80- | 80 | 0.1808E-04 | 933.1644 | 27.9756 | (AU ) | A ( | 0.00) | I |
| 81- | 81 | 0.1926E-04 | 963.1394 | 28.8742 | (AU ) | A ( | 0.00) | I |
| 82- | 82 | 0.1926E-04 | 963.2878 | 28.8786 | (AG ) | I ( | 0.00) | A |
| 83- | 83 | 0.1996E-04 | 980.4268 | 29.3925 | (BU ) | A ( | 0.00) | I |
| 84- | 84 | 0.1996E-04 | 980.4542 | 29.3933 | (BG ) | I ( | 0.00) | A |

NORMAL MODES NORMALIZED TO CLASSICAL AMPLITUDES

FREQ (CM\*\*-1)      -1.98      -1.77      -1.61      101.53      105.87      106.98



|     |    |    |   |         |         |         |         |         |         |
|-----|----|----|---|---------|---------|---------|---------|---------|---------|
| AT. | 1  | CA | X | -0.0005 | 0.2114  | 0.2443  | 0.0415  | 0.0070  | 0.0112  |
|     |    |    | Y | 0.2979  | 0.0007  | 0.0006  | -0.0057 | -0.0468 | -0.0010 |
|     |    |    | Z | 0.0015  | 0.2333  | -0.2219 | -0.0135 | 0.0019  | 0.0461  |
| AT. | 2  | CA | X | 0.0005  | 0.2114  | 0.2443  | -0.0415 | 0.0070  | 0.0112  |
|     |    |    | Y | 0.2979  | -0.0007 | -0.0006 | -0.0057 | 0.0468  | 0.0010  |
|     |    |    | Z | -0.0015 | 0.2333  | -0.2219 | 0.0135  | 0.0019  | 0.0461  |
| AT. | 3  | CA | X | -0.0005 | 0.2114  | 0.2443  | 0.0415  | 0.0070  | -0.0112 |
|     |    |    | Y | 0.2979  | 0.0007  | 0.0006  | -0.0057 | -0.0468 | 0.0010  |
|     |    |    | Z | 0.0015  | 0.2333  | -0.2219 | -0.0135 | 0.0019  | -0.0461 |
| AT. | 4  | CA | X | 0.0005  | 0.2114  | 0.2443  | -0.0415 | 0.0070  | -0.0112 |
|     |    |    | Y | 0.2979  | -0.0007 | -0.0006 | -0.0057 | 0.0468  | -0.0010 |
|     |    |    | Z | -0.0015 | 0.2333  | -0.2219 | 0.0135  | 0.0019  | -0.0461 |
| AT. | 5  | CA | X | -0.0007 | 0.2107  | 0.2443  | 0.0152  | 0.0042  | 0.0430  |
|     |    |    | Y | 0.2972  | -0.0008 | 0.0000  | 0.0100  | 0.0006  | -0.0039 |
|     |    |    | Z | -0.0005 | 0.2331  | -0.2222 | -0.0009 | 0.0017  | -0.0107 |
| AT. | 6  | CA | X | 0.0007  | 0.2107  | 0.2443  | -0.0152 | 0.0042  | 0.0430  |
|     |    |    | Y | 0.2972  | 0.0008  | -0.0000 | 0.0100  | -0.0006 | 0.0039  |
|     |    |    | Z | 0.0005  | 0.2331  | -0.2222 | 0.0009  | 0.0017  | -0.0107 |
| AT. | 7  | CA | X | -0.0007 | 0.2107  | 0.2443  | 0.0152  | 0.0042  | -0.0430 |
|     |    |    | Y | 0.2972  | -0.0008 | 0.0000  | 0.0100  | 0.0006  | 0.0039  |
|     |    |    | Z | -0.0005 | 0.2331  | -0.2222 | -0.0009 | 0.0017  | 0.0107  |
| AT. | 8  | CA | X | 0.0007  | 0.2107  | 0.2443  | -0.0152 | 0.0042  | -0.0430 |
|     |    |    | Y | 0.2972  | 0.0008  | -0.0000 | 0.0100  | -0.0006 | -0.0039 |
|     |    |    | Z | 0.0005  | 0.2331  | -0.2222 | 0.0009  | 0.0017  | 0.0107  |
| AT. | 9  | SI | X | -0.0008 | 0.2114  | 0.2450  | 0.0380  | -0.0018 | 0.0221  |
|     |    |    | Y | 0.2963  | 0.0009  | 0.0010  | -0.0010 | -0.0402 | -0.0013 |
|     |    |    | Z | -0.0003 | 0.2332  | -0.2208 | 0.0057  | -0.0005 | 0.0144  |
| AT. | 10 | SI | X | 0.0008  | 0.2114  | 0.2450  | -0.0380 | -0.0018 | 0.0221  |
|     |    |    | Y | 0.2963  | -0.0009 | -0.0010 | -0.0010 | 0.0402  | 0.0013  |
|     |    |    | Z | 0.0003  | 0.2332  | -0.2208 | -0.0057 | -0.0005 | 0.0144  |
| AT. | 11 | SI | X | -0.0008 | 0.2114  | 0.2450  | 0.0380  | -0.0018 | -0.0221 |
|     |    |    | Y | 0.2963  | 0.0009  | 0.0010  | -0.0010 | -0.0402 | 0.0013  |
|     |    |    | Z | -0.0003 | 0.2332  | -0.2208 | 0.0057  | -0.0005 | -0.0144 |
| AT. | 12 | SI | X | 0.0008  | 0.2114  | 0.2450  | -0.0380 | -0.0018 | -0.0221 |
|     |    |    | Y | 0.2963  | -0.0009 | -0.0010 | -0.0010 | 0.0402  | -0.0013 |
|     |    |    | Z | 0.0003  | 0.2332  | -0.2208 | -0.0057 | -0.0005 | -0.0144 |
| AT. | 13 | O  | X | -0.0040 | 0.2128  | 0.2463  | 0.0783  | -0.0427 | 0.0047  |
|     |    |    | Y | 0.2979  | 0.0007  | 0.0010  | 0.0048  | -0.0440 | -0.0058 |
|     |    |    | Z | 0.0012  | 0.2317  | -0.2196 | 0.0033  | -0.0128 | 0.0141  |
| AT. | 14 | O  | X | 0.0040  | 0.2128  | 0.2463  | -0.0783 | -0.0427 | 0.0047  |
|     |    |    | Y | 0.2979  | -0.0007 | -0.0010 | 0.0048  | 0.0440  | 0.0058  |
|     |    |    | Z | -0.0012 | 0.2317  | -0.2196 | -0.0033 | -0.0128 | 0.0141  |
| AT. | 15 | O  | X | -0.0040 | 0.2128  | 0.2463  | 0.0783  | -0.0427 | -0.0047 |
|     |    |    | Y | 0.2979  | 0.0007  | 0.0010  | 0.0048  | -0.0440 | 0.0058  |
|     |    |    | Z | 0.0012  | 0.2317  | -0.2196 | 0.0033  | -0.0128 | -0.0141 |
| AT. | 16 | O  | X | 0.0040  | 0.2128  | 0.2463  | -0.0783 | -0.0427 | -0.0047 |
|     |    |    | Y | 0.2979  | -0.0007 | -0.0010 | 0.0048  | 0.0440  | -0.0058 |
|     |    |    | Z | -0.0012 | 0.2317  | -0.2196 | -0.0033 | -0.0128 | -0.0141 |
| AT. | 17 | O  | X | -0.0017 | 0.2109  | 0.2436  | 0.0365  | 0.0089  | 0.0340  |
|     |    |    | Y | 0.2969  | -0.0007 | 0.0014  | 0.0129  | -0.0634 | 0.0013  |
|     |    |    | Z | 0.0006  | 0.2337  | -0.2226 | -0.0094 | 0.0087  | -0.0193 |
| AT. | 18 | O  | X | 0.0017  | 0.2109  | 0.2436  | -0.0365 | 0.0089  | 0.0340  |
|     |    |    | Y | 0.2969  | 0.0007  | -0.0014 | 0.0129  | 0.0634  | -0.0013 |
|     |    |    | Z | -0.0006 | 0.2337  | -0.2226 | 0.0094  | 0.0087  | -0.0193 |
| AT. | 19 | O  | X | -0.0017 | 0.2109  | 0.2436  | 0.0365  | 0.0089  | -0.0340 |
|     |    |    | Y | 0.2969  | -0.0007 | 0.0014  | 0.0129  | -0.0634 | -0.0013 |
|     |    |    | Z | 0.0006  | 0.2337  | -0.2226 | -0.0094 | 0.0087  | 0.0193  |
| AT. | 20 | O  | X | 0.0017  | 0.2109  | 0.2436  | -0.0365 | 0.0089  | -0.0340 |
|     |    |    | Y | 0.2969  | 0.0007  | -0.0014 | 0.0129  | 0.0634  | 0.0013  |
|     |    |    | Z | -0.0006 | 0.2337  | -0.2226 | 0.0094  | 0.0087  | 0.0193  |
| AT. | 21 | O  | X | -0.0014 | 0.2123  | 0.2440  | 0.0332  | 0.0009  | 0.0460  |
|     |    |    | Y | 0.2978  | -0.0005 | 0.0012  | -0.0179 | -0.0050 | 0.0028  |
|     |    |    | Z | -0.0002 | 0.2321  | -0.2226 | 0.0027  | -0.0055 | 0.0389  |
| AT. | 22 | O  | X | 0.0014  | 0.2123  | 0.2440  | -0.0332 | 0.0009  | 0.0460  |
|     |    |    | Y | 0.2978  | 0.0005  | -0.0012 | -0.0179 | 0.0050  | -0.0028 |
|     |    |    | Z | 0.0002  | 0.2321  | -0.2226 | -0.0027 | -0.0055 | 0.0389  |
| AT. | 23 | O  | X | -0.0014 | 0.2123  | 0.2440  | 0.0332  | 0.0009  | -0.0460 |
|     |    |    | Y | 0.2978  | -0.0005 | 0.0012  | -0.0179 | -0.0050 | -0.0028 |
|     |    |    | Z | -0.0002 | 0.2321  | -0.2226 | 0.0027  | -0.0055 | -0.0389 |
| AT. | 24 | O  | X | 0.0014  | 0.2123  | 0.2440  | -0.0332 | 0.0009  | -0.0460 |
|     |    |    | Y | 0.2978  | 0.0005  | -0.0012 | -0.0179 | 0.0050  | 0.0028  |
|     |    |    | Z | 0.0002  | 0.2321  | -0.2226 | -0.0027 | -0.0055 | -0.0389 |
| AT. | 25 | O  | X | -0.0003 | 0.2119  | 0.2439  | 0.0320  | 0.0092  | -0.0072 |
|     |    |    | Y | 0.2970  | -0.0002 | 0.0007  | -0.0067 | -0.0326 | -0.0112 |
|     |    |    | Z | 0.0001  | 0.2340  | -0.2228 | 0.0030  | 0.0010  | 0.0146  |
| AT. | 26 | O  | X | 0.0003  | 0.2119  | 0.2439  | -0.0320 | 0.0092  | -0.0072 |
|     |    |    | Y | 0.2970  | 0.0002  | -0.0007 | -0.0067 | 0.0326  | 0.0112  |
|     |    |    | Z | -0.0001 | 0.2340  | -0.2228 | -0.0030 | 0.0010  | 0.0146  |
| AT. | 27 | O  | X | -0.0003 | 0.2119  | 0.2439  | 0.0320  | 0.0092  | 0.0072  |

|     |    |   |         |         |         |         |         |         |
|-----|----|---|---------|---------|---------|---------|---------|---------|
|     |    | Y | 0.2970  | -0.0002 | 0.0007  | -0.0067 | -0.0326 | 0.0112  |
|     |    | Z | 0.0001  | 0.2340  | -0.2228 | 0.0030  | 0.0010  | -0.0146 |
| AT. | 28 | O | X       | 0.0003  | 0.2119  | 0.2439  | -0.0320 | 0.0092  |
|     |    | Y | 0.2970  | 0.0002  | -0.0007 | -0.0067 | 0.0326  | -0.0112 |
|     |    | Z | -0.0001 | 0.2340  | -0.2228 | -0.0030 | 0.0010  | -0.0146 |

| FREQ (CM**-1) |    |    | 112.40 | 123.23  | 140.54  | 143.44  | 147.97  | 152.89  |         |
|---------------|----|----|--------|---------|---------|---------|---------|---------|---------|
| AT.           | 1  | CA | X      | 0.0100  | 0.0053  | 0.0041  | 0.0035  | -0.0039 | -0.0208 |
|               |    |    | Y      | 0.0112  | 0.0011  | -0.0036 | -0.0162 | 0.0147  | 0.0038  |
|               |    |    | Z      | 0.0271  | 0.0448  | 0.0062  | -0.0146 | -0.0031 | 0.0233  |
| AT.           | 2  | CA | X      | -0.0100 | -0.0053 | -0.0041 | -0.0035 | -0.0039 | 0.0208  |
|               |    |    | Y      | 0.0112  | 0.0011  | -0.0036 | -0.0162 | -0.0147 | 0.0038  |
|               |    |    | Z      | -0.0271 | -0.0448 | -0.0062 | 0.0146  | -0.0031 | -0.0233 |
| AT.           | 3  | CA | X      | -0.0100 | 0.0053  | -0.0041 | 0.0035  | -0.0039 | 0.0208  |
|               |    |    | Y      | -0.0112 | 0.0011  | 0.0036  | -0.0162 | 0.0147  | -0.0038 |
|               |    |    | Z      | -0.0271 | 0.0448  | -0.0062 | -0.0146 | -0.0031 | -0.0233 |
| AT.           | 4  | CA | X      | 0.0100  | -0.0053 | 0.0041  | -0.0035 | -0.0039 | -0.0208 |
|               |    |    | Y      | -0.0112 | 0.0011  | 0.0036  | -0.0162 | -0.0147 | -0.0038 |
|               |    |    | Z      | 0.0271  | -0.0448 | 0.0062  | 0.0146  | -0.0031 | 0.0233  |
| AT.           | 5  | CA | X      | 0.0071  | 0.0223  | 0.0380  | 0.0318  | 0.0217  | -0.0389 |
|               |    |    | Y      | 0.0163  | 0.0028  | 0.0563  | 0.0422  | 0.0044  | 0.0141  |
|               |    |    | Z      | -0.0007 | 0.0004  | -0.0120 | -0.0223 | -0.0040 | -0.0130 |
| AT.           | 6  | CA | X      | -0.0071 | -0.0223 | -0.0380 | -0.0318 | 0.0217  | 0.0389  |
|               |    |    | Y      | 0.0163  | 0.0028  | 0.0563  | 0.0422  | -0.0044 | 0.0141  |
|               |    |    | Z      | 0.0007  | -0.0004 | 0.0120  | 0.0223  | -0.0040 | 0.0130  |
| AT.           | 7  | CA | X      | -0.0071 | 0.0223  | -0.0380 | 0.0318  | 0.0217  | 0.0389  |
|               |    |    | Y      | -0.0163 | 0.0028  | -0.0563 | 0.0422  | 0.0044  | -0.0141 |
|               |    |    | Z      | 0.0007  | 0.0004  | 0.0120  | -0.0223 | -0.0040 | 0.0130  |
| AT.           | 8  | CA | X      | 0.0071  | -0.0223 | 0.0380  | -0.0318 | 0.0217  | -0.0389 |
|               |    |    | Y      | -0.0163 | 0.0028  | -0.0563 | 0.0422  | -0.0044 | -0.0141 |
|               |    |    | Z      | -0.0007 | -0.0004 | -0.0120 | 0.0223  | -0.0040 | -0.0130 |
| AT.           | 9  | SI | X      | -0.0066 | -0.0066 | 0.0009  | -0.0066 | -0.0017 | 0.0178  |
|               |    |    | Y      | 0.0132  | -0.0016 | -0.0017 | -0.0086 | 0.0127  | -0.0025 |
|               |    |    | Z      | -0.0222 | -0.0043 | -0.0029 | 0.0100  | 0.0016  | -0.0161 |
| AT.           | 10 | SI | X      | 0.0066  | 0.0066  | -0.0009 | 0.0066  | -0.0017 | -0.0178 |
|               |    |    | Y      | 0.0132  | -0.0016 | -0.0017 | -0.0086 | -0.0127 | -0.0025 |
|               |    |    | Z      | 0.0222  | 0.0043  | 0.0029  | -0.0100 | 0.0016  | 0.0161  |
| AT.           | 11 | SI | X      | 0.0066  | -0.0066 | -0.0009 | -0.0066 | -0.0017 | -0.0178 |
|               |    |    | Y      | -0.0132 | -0.0016 | 0.0017  | -0.0086 | 0.0127  | 0.0025  |
|               |    |    | Z      | 0.0222  | -0.0043 | 0.0029  | 0.0100  | 0.0016  | 0.0161  |
| AT.           | 12 | SI | X      | -0.0066 | 0.0066  | 0.0009  | 0.0066  | -0.0017 | 0.0178  |
|               |    |    | Y      | -0.0132 | -0.0016 | 0.0017  | -0.0086 | -0.0127 | 0.0025  |
|               |    |    | Z      | -0.0222 | 0.0043  | -0.0029 | -0.0100 | 0.0016  | -0.0161 |
| AT.           | 13 | O  | X      | 0.0241  | 0.0296  | -0.0042 | -0.0381 | -0.0528 | -0.0191 |
|               |    |    | Y      | 0.0104  | -0.0010 | -0.0018 | -0.0141 | 0.0091  | -0.0068 |
|               |    |    | Z      | 0.0308  | 0.0369  | -0.0090 | 0.0134  | -0.0369 | -0.0218 |
| AT.           | 14 | O  | X      | -0.0241 | -0.0296 | 0.0042  | 0.0381  | -0.0528 | 0.0191  |
|               |    |    | Y      | 0.0104  | -0.0010 | -0.0018 | -0.0141 | -0.0091 | -0.0068 |
|               |    |    | Z      | -0.0308 | -0.0369 | 0.0090  | -0.0134 | -0.0369 | 0.0218  |
| AT.           | 15 | O  | X      | -0.0241 | 0.0296  | 0.0042  | -0.0381 | -0.0528 | 0.0191  |
|               |    |    | Y      | -0.0104 | -0.0010 | 0.0018  | -0.0141 | 0.0091  | 0.0068  |
|               |    |    | Z      | -0.0308 | 0.0369  | 0.0090  | 0.0134  | -0.0369 | 0.0218  |
| AT.           | 16 | O  | X      | 0.0241  | -0.0296 | -0.0042 | 0.0381  | -0.0528 | -0.0191 |
|               |    |    | Y      | -0.0104 | -0.0010 | 0.0018  | -0.0141 | -0.0091 | 0.0068  |
|               |    |    | Z      | 0.0308  | -0.0369 | -0.0090 | -0.0134 | -0.0369 | -0.0218 |
| AT.           | 17 | O  | X      | -0.0232 | -0.0315 | 0.0124  | 0.0051  | 0.0157  | 0.0242  |
|               |    |    | Y      | 0.0512  | 0.0207  | -0.0199 | -0.0229 | -0.0302 | -0.0159 |
|               |    |    | Z      | -0.0329 | 0.0297  | 0.0055  | 0.0016  | 0.0179  | -0.0179 |
| AT.           | 18 | O  | X      | 0.0232  | 0.0315  | -0.0124 | -0.0051 | 0.0157  | -0.0242 |
|               |    |    | Y      | 0.0512  | 0.0207  | -0.0199 | -0.0229 | 0.0302  | -0.0159 |
|               |    |    | Z      | 0.0329  | -0.0297 | -0.0055 | -0.0016 | 0.0179  | 0.0179  |
| AT.           | 19 | O  | X      | 0.0232  | -0.0315 | -0.0124 | 0.0051  | 0.0157  | -0.0242 |
|               |    |    | Y      | -0.0512 | 0.0207  | 0.0199  | -0.0229 | -0.0302 | 0.0159  |
|               |    |    | Z      | 0.0329  | 0.0297  | -0.0055 | 0.0016  | 0.0179  | 0.0179  |
| AT.           | 20 | O  | X      | -0.0232 | 0.0315  | 0.0124  | -0.0051 | 0.0157  | 0.0242  |
|               |    |    | Y      | -0.0512 | 0.0207  | 0.0199  | -0.0229 | 0.0302  | 0.0159  |
|               |    |    | Z      | -0.0329 | -0.0297 | 0.0055  | -0.0016 | 0.0179  | -0.0179 |
| AT.           | 21 | O  | X      | -0.0196 | -0.0349 | 0.0105  | -0.0019 | -0.0019 | 0.0318  |
|               |    |    | Y      | 0.0215  | 0.0045  | 0.0066  | 0.0122  | 0.0030  | 0.0233  |
|               |    |    | Z      | -0.0388 | -0.0372 | 0.0078  | 0.0089  | 0.0036  | -0.0027 |
| AT.           | 22 | O  | X      | 0.0196  | 0.0349  | -0.0105 | 0.0019  | -0.0019 | -0.0318 |
|               |    |    | Y      | 0.0215  | 0.0045  | 0.0066  | 0.0122  | -0.0030 | 0.0233  |
|               |    |    | Z      | 0.0388  | 0.0372  | -0.0078 | -0.0089 | 0.0036  | 0.0027  |
| AT.           | 23 | O  | X      | 0.0196  | -0.0349 | -0.0105 | -0.0019 | -0.0019 | -0.0318 |
|               |    |    | Y      | -0.0215 | 0.0045  | -0.0066 | 0.0122  | 0.0030  | -0.0233 |
|               |    |    | Z      | 0.0388  | -0.0372 | -0.0078 | 0.0089  | 0.0036  | 0.0027  |
| AT.           | 24 | O  | X      | -0.0196 | 0.0349  | 0.0105  | 0.0019  | -0.0019 | 0.0318  |
|               |    |    | Y      | -0.0215 | 0.0045  | -0.0066 | 0.0122  | -0.0030 | -0.0233 |

|     |    |     |         |         |         |         |         |         |
|-----|----|-----|---------|---------|---------|---------|---------|---------|
|     |    | Z   | -0.0388 | 0.0372  | 0.0078  | -0.0089 | 0.0036  | -0.0027 |
| AT. | 25 | O X | -0.0146 | 0.0142  | 0.0011  | 0.0051  | -0.0022 | 0.0165  |
|     |    | Y   | -0.0405 | -0.0318 | 0.0175  | -0.0253 | 0.0627  | -0.0026 |
|     |    | Z   | -0.0471 | -0.0210 | 0.0106  | -0.0049 | 0.0299  | -0.0153 |
| AT. | 26 | O X | 0.0146  | -0.0142 | -0.0011 | -0.0051 | -0.0022 | -0.0165 |
|     |    | Y   | -0.0405 | -0.0318 | 0.0175  | -0.0253 | -0.0627 | -0.0026 |
|     |    | Z   | 0.0471  | 0.0210  | -0.0106 | 0.0049  | 0.0299  | 0.0153  |
| AT. | 27 | O X | 0.0146  | 0.0142  | -0.0011 | 0.0051  | -0.0022 | -0.0165 |
|     |    | Y   | 0.0405  | -0.0318 | -0.0175 | -0.0253 | 0.0627  | 0.0026  |
|     |    | Z   | 0.0471  | -0.0210 | -0.0106 | -0.0049 | 0.0299  | 0.0153  |
| AT. | 28 | O X | -0.0146 | -0.0142 | 0.0011  | -0.0051 | -0.0022 | 0.0165  |
|     |    | Y   | 0.0405  | -0.0318 | -0.0175 | -0.0253 | -0.0627 | 0.0026  |
|     |    | Z   | -0.0471 | 0.0210  | 0.0106  | 0.0049  | 0.0299  | -0.0153 |

FREQ (CM\*\*-1)      153.42      160.10      164.87      172.34      172.64      175.87

|     |    |      |         |         |         |         |         |         |
|-----|----|------|---------|---------|---------|---------|---------|---------|
| AT. | 1  | CA X | -0.0097 | -0.0279 | 0.0211  | 0.0310  | -0.0130 | 0.0257  |
|     |    | Y    | -0.0286 | -0.0071 | 0.0282  | -0.0018 | -0.0103 | -0.0270 |
|     |    | Z    | -0.0032 | 0.0283  | -0.0043 | 0.0284  | -0.0259 | 0.0336  |
| AT. | 2  | CA X | -0.0097 | -0.0279 | -0.0211 | 0.0310  | -0.0130 | -0.0257 |
|     |    | Y    | 0.0286  | 0.0071  | 0.0282  | 0.0018  | 0.0103  | -0.0270 |
|     |    | Z    | -0.0032 | 0.0283  | 0.0043  | 0.0284  | -0.0259 | -0.0336 |
| AT. | 3  | CA X | 0.0097  | 0.0279  | -0.0211 | -0.0310 | -0.0130 | -0.0257 |
|     |    | Y    | 0.0286  | 0.0071  | -0.0282 | 0.0018  | -0.0103 | 0.0270  |
|     |    | Z    | 0.0032  | -0.0283 | 0.0043  | -0.0284 | -0.0259 | -0.0336 |
| AT. | 4  | CA X | 0.0097  | 0.0279  | 0.0211  | -0.0310 | -0.0130 | 0.0257  |
|     |    | Y    | -0.0286 | -0.0071 | -0.0282 | -0.0018 | 0.0103  | 0.0270  |
|     |    | Z    | 0.0032  | -0.0283 | -0.0043 | -0.0284 | -0.0259 | 0.0336  |
| AT. | 5  | CA X | -0.0004 | -0.0409 | -0.0093 | -0.0163 | -0.0134 | 0.0043  |
|     |    | Y    | -0.0244 | -0.0094 | -0.0021 | -0.0242 | 0.0054  | -0.0128 |
|     |    | Z    | -0.0093 | -0.0167 | -0.0274 | -0.0003 | -0.0102 | -0.0011 |
| AT. | 6  | CA X | -0.0004 | -0.0409 | 0.0093  | -0.0163 | -0.0134 | -0.0043 |
|     |    | Y    | 0.0244  | 0.0094  | -0.0021 | 0.0242  | -0.0054 | -0.0128 |
|     |    | Z    | 0.0093  | -0.0167 | 0.0274  | -0.0003 | -0.0102 | 0.0011  |
| AT. | 7  | CA X | 0.0004  | 0.0409  | 0.0093  | 0.0163  | -0.0134 | -0.0043 |
|     |    | Y    | 0.0244  | 0.0094  | 0.0021  | 0.0242  | 0.0054  | 0.0128  |
|     |    | Z    | -0.0093 | 0.0167  | 0.0274  | 0.0003  | -0.0102 | 0.0011  |
| AT. | 8  | CA X | 0.0004  | 0.0409  | -0.0093 | 0.0163  | -0.0134 | 0.0043  |
|     |    | Y    | -0.0244 | -0.0094 | 0.0021  | -0.0242 | -0.0054 | 0.0128  |
|     |    | Z    | -0.0093 | 0.0167  | -0.0274 | 0.0003  | -0.0102 | -0.0011 |
| AT. | 9  | SI X | 0.0060  | 0.0047  | -0.0208 | -0.0312 | 0.0055  | -0.0121 |
|     |    | Y    | -0.0220 | -0.0057 | 0.0156  | -0.0004 | -0.0115 | -0.0213 |
|     |    | Z    | -0.0134 | 0.0077  | -0.0090 | -0.0068 | 0.0138  | -0.0099 |
| AT. | 10 | SI X | 0.0060  | 0.0047  | 0.0208  | -0.0312 | 0.0055  | 0.0121  |
|     |    | Y    | 0.0220  | 0.0057  | 0.0156  | 0.0004  | 0.0115  | -0.0213 |
|     |    | Z    | -0.0134 | 0.0077  | 0.0090  | -0.0068 | 0.0138  | 0.0099  |
| AT. | 11 | SI X | -0.0060 | -0.0047 | 0.0208  | 0.0312  | 0.0055  | 0.0121  |
|     |    | Y    | 0.0220  | 0.0057  | -0.0156 | 0.0004  | -0.0115 | 0.0213  |
|     |    | Z    | 0.0134  | -0.0077 | 0.0090  | 0.0068  | 0.0138  | 0.0099  |
| AT. | 12 | SI X | -0.0060 | -0.0047 | -0.0208 | 0.0312  | 0.0055  | -0.0121 |
|     |    | Y    | -0.0220 | -0.0057 | -0.0156 | -0.0004 | 0.0115  | 0.0213  |
|     |    | Z    | 0.0134  | -0.0077 | -0.0090 | 0.0068  | 0.0138  | -0.0099 |
| AT. | 13 | O X  | -0.0291 | 0.0175  | -0.0227 | -0.0104 | 0.0454  | -0.0108 |
|     |    | Y    | -0.0246 | -0.0078 | 0.0211  | 0.0033  | -0.0015 | -0.0199 |
|     |    | Z    | -0.0331 | 0.0332  | -0.0402 | -0.0149 | -0.0147 | -0.0156 |
| AT. | 14 | O X  | -0.0291 | 0.0175  | 0.0227  | -0.0104 | 0.0454  | 0.0108  |
|     |    | Y    | 0.0246  | 0.0078  | 0.0211  | -0.0033 | 0.0015  | -0.0199 |
|     |    | Z    | -0.0331 | 0.0332  | 0.0402  | -0.0149 | -0.0147 | 0.0156  |
| AT. | 15 | O X  | 0.0291  | -0.0175 | 0.0227  | 0.0104  | 0.0454  | 0.0108  |
|     |    | Y    | 0.0246  | 0.0078  | -0.0211 | -0.0033 | -0.0015 | 0.0199  |
|     |    | Z    | 0.0331  | -0.0332 | 0.0402  | 0.0149  | -0.0147 | 0.0156  |
| AT. | 16 | O X  | 0.0291  | -0.0175 | -0.0227 | 0.0104  | 0.0454  | -0.0108 |
|     |    | Y    | -0.0246 | -0.0078 | -0.0211 | 0.0033  | 0.0015  | 0.0199  |
|     |    | Z    | 0.0331  | -0.0332 | -0.0402 | 0.0149  | -0.0147 | -0.0156 |
| AT. | 17 | O X  | 0.0212  | 0.0084  | -0.0190 | -0.0269 | 0.0076  | -0.0062 |
|     |    | Y    | -0.0535 | -0.0036 | 0.0103  | 0.0028  | -0.0097 | -0.0183 |
|     |    | Z    | 0.0010  | -0.0065 | -0.0044 | -0.0033 | 0.0135  | -0.0172 |
| AT. | 18 | O X  | 0.0212  | 0.0084  | 0.0190  | -0.0269 | 0.0076  | 0.0062  |
|     |    | Y    | 0.0535  | 0.0036  | 0.0103  | -0.0028 | 0.0097  | -0.0183 |
|     |    | Z    | 0.0010  | -0.0065 | 0.0044  | -0.0033 | 0.0135  | 0.0172  |
| AT. | 19 | O X  | -0.0212 | -0.0084 | 0.0190  | 0.0269  | 0.0076  | 0.0062  |
|     |    | Y    | 0.0535  | 0.0036  | -0.0103 | -0.0028 | -0.0097 | 0.0183  |
|     |    | Z    | -0.0010 | 0.0065  | 0.0044  | 0.0033  | 0.0135  | 0.0172  |
| AT. | 20 | O X  | -0.0212 | -0.0084 | -0.0190 | 0.0269  | 0.0076  | -0.0062 |
|     |    | Y    | -0.0535 | -0.0036 | -0.0103 | 0.0028  | 0.0097  | 0.0183  |
|     |    | Z    | -0.0010 | 0.0065  | -0.0044 | 0.0033  | 0.0135  | -0.0172 |
| AT. | 21 | O X  | 0.0189  | -0.0013 | -0.0068 | -0.0141 | 0.0156  | 0.0069  |
|     |    | Y    | 0.0041  | 0.0119  | -0.0009 | -0.0182 | -0.0403 | -0.0257 |
|     |    | Z    | -0.0023 | -0.0035 | 0.0138  | 0.0140  | 0.0318  | 0.0147  |

|               |    |    |   |         |         |         |         |         |         |
|---------------|----|----|---|---------|---------|---------|---------|---------|---------|
| AT.           | 22 | O  | X | 0.0189  | -0.0013 | 0.0068  | -0.0141 | 0.0156  | -0.0069 |
|               |    |    | Y | -0.0041 | -0.0119 | -0.0009 | 0.0182  | 0.0403  | -0.0257 |
|               |    |    | Z | -0.0023 | -0.0035 | -0.0138 | 0.0140  | 0.0318  | -0.0147 |
| AT.           | 23 | O  | X | -0.0189 | 0.0013  | 0.0068  | 0.0141  | 0.0156  | -0.0069 |
|               |    |    | Y | -0.0041 | -0.0119 | 0.0009  | 0.0182  | -0.0403 | 0.0257  |
|               |    |    | Z | 0.0023  | 0.0035  | -0.0138 | -0.0140 | 0.0318  | -0.0147 |
| AT.           | 24 | O  | X | -0.0189 | 0.0013  | -0.0068 | 0.0141  | 0.0156  | 0.0069  |
|               |    |    | Y | 0.0041  | 0.0119  | 0.0009  | -0.0182 | 0.0403  | 0.0257  |
|               |    |    | Z | 0.0023  | 0.0035  | 0.0138  | -0.0140 | 0.0318  | 0.0147  |
| AT.           | 25 | O  | X | 0.0173  | 0.0127  | -0.0256 | -0.0241 | -0.0122 | -0.0177 |
|               |    |    | Y | 0.0213  | -0.0215 | 0.0299  | 0.0142  | 0.0163  | -0.0079 |
|               |    |    | Z | 0.0056  | -0.0015 | 0.0012  | 0.0007  | 0.0350  | -0.0023 |
| AT.           | 26 | O  | X | 0.0173  | 0.0127  | 0.0256  | -0.0241 | -0.0122 | 0.0177  |
|               |    |    | Y | -0.0213 | 0.0215  | 0.0299  | -0.0142 | -0.0163 | -0.0079 |
|               |    |    | Z | 0.0056  | -0.0015 | -0.0012 | 0.0007  | 0.0350  | 0.0023  |
| AT.           | 27 | O  | X | -0.0173 | -0.0127 | 0.0256  | 0.0241  | -0.0122 | 0.0177  |
|               |    |    | Y | -0.0213 | 0.0215  | -0.0299 | -0.0142 | 0.0163  | 0.0079  |
|               |    |    | Z | -0.0056 | 0.0015  | -0.0012 | -0.0007 | 0.0350  | 0.0023  |
| AT.           | 28 | O  | X | -0.0173 | -0.0127 | -0.0256 | 0.0241  | -0.0122 | -0.0177 |
|               |    |    | Y | 0.0213  | -0.0215 | -0.0299 | 0.0142  | -0.0163 | 0.0079  |
|               |    |    | Z | -0.0056 | 0.0015  | 0.0012  | -0.0007 | 0.0350  | -0.0023 |
| FREQ (CM**-1) |    |    |   | 179.37  | 185.83  | 197.56  | 198.37  | 199.36  | 203.59  |
| AT.           | 1  | CA | X | -0.0364 | -0.0112 | -0.0181 | -0.0168 | -0.0108 | -0.0023 |
|               |    |    | Y | 0.0029  | 0.0052  | 0.0052  | 0.0401  | -0.0033 | 0.0272  |
|               |    |    | Z | -0.0197 | 0.0130  | -0.0090 | 0.0025  | -0.0340 | 0.0339  |
| AT.           | 2  | CA | X | 0.0364  | 0.0112  | 0.0181  | -0.0168 | -0.0108 | 0.0023  |
|               |    |    | Y | 0.0029  | 0.0052  | 0.0052  | -0.0401 | 0.0033  | 0.0272  |
|               |    |    | Z | 0.0197  | -0.0130 | 0.0090  | 0.0025  | -0.0340 | -0.0339 |
| AT.           | 3  | CA | X | -0.0364 | -0.0112 | 0.0181  | 0.0168  | -0.0108 | 0.0023  |
|               |    |    | Y | 0.0029  | 0.0052  | -0.0052 | -0.0401 | -0.0033 | -0.0272 |
|               |    |    | Z | -0.0197 | 0.0130  | 0.0090  | -0.0025 | -0.0340 | -0.0339 |
| AT.           | 4  | CA | X | 0.0364  | 0.0112  | -0.0181 | 0.0168  | -0.0108 | -0.0023 |
|               |    |    | Y | 0.0029  | 0.0052  | -0.0052 | 0.0401  | 0.0033  | -0.0272 |
|               |    |    | Z | 0.0197  | -0.0130 | -0.0090 | -0.0025 | -0.0340 | 0.0339  |
| AT.           | 5  | CA | X | 0.0226  | 0.0341  | 0.0260  | -0.0064 | 0.0176  | 0.0155  |
|               |    |    | Y | -0.0056 | 0.0054  | -0.0207 | -0.0196 | 0.0053  | -0.0157 |
|               |    |    | Z | -0.0141 | 0.0346  | -0.0328 | 0.0013  | 0.0066  | 0.0055  |
| AT.           | 6  | CA | X | -0.0226 | -0.0341 | -0.0260 | -0.0064 | 0.0176  | -0.0155 |
|               |    |    | Y | -0.0056 | 0.0054  | -0.0207 | 0.0196  | -0.0053 | -0.0157 |
|               |    |    | Z | 0.0141  | -0.0346 | 0.0328  | 0.0013  | 0.0066  | -0.0055 |
| AT.           | 7  | CA | X | 0.0226  | 0.0341  | -0.0260 | 0.0064  | 0.0176  | -0.0155 |
|               |    |    | Y | -0.0056 | 0.0054  | 0.0207  | 0.0196  | 0.0053  | 0.0157  |
|               |    |    | Z | -0.0141 | 0.0346  | 0.0328  | -0.0013 | 0.0066  | -0.0055 |
| AT.           | 8  | CA | X | -0.0226 | -0.0341 | 0.0260  | 0.0064  | 0.0176  | 0.0155  |
|               |    |    | Y | -0.0056 | 0.0054  | 0.0207  | -0.0196 | -0.0053 | 0.0157  |
|               |    |    | Z | 0.0141  | -0.0346 | -0.0328 | -0.0013 | 0.0066  | 0.0055  |
| AT.           | 9  | SI | X | -0.0091 | 0.0035  | 0.0110  | 0.0087  | 0.0007  | 0.0144  |
|               |    |    | Y | 0.0020  | -0.0036 | -0.0134 | 0.0222  | 0.0054  | 0.0150  |
|               |    |    | Z | 0.0053  | -0.0057 | -0.0165 | -0.0037 | 0.0106  | 0.0118  |
| AT.           | 10 | SI | X | 0.0091  | -0.0035 | -0.0110 | 0.0087  | 0.0007  | -0.0144 |
|               |    |    | Y | 0.0020  | -0.0036 | -0.0134 | -0.0222 | -0.0054 | 0.0150  |
|               |    |    | Z | -0.0053 | 0.0057  | 0.0165  | -0.0037 | 0.0106  | -0.0118 |
| AT.           | 11 | SI | X | -0.0091 | 0.0035  | -0.0110 | -0.0087 | 0.0007  | -0.0144 |
|               |    |    | Y | 0.0020  | -0.0036 | 0.0134  | -0.0222 | 0.0054  | -0.0150 |
|               |    |    | Z | 0.0053  | -0.0057 | 0.0165  | 0.0037  | 0.0106  | -0.0118 |
| AT.           | 12 | SI | X | 0.0091  | -0.0035 | 0.0110  | -0.0087 | 0.0007  | 0.0144  |
|               |    |    | Y | 0.0020  | -0.0036 | 0.0134  | 0.0222  | -0.0054 | -0.0150 |
|               |    |    | Z | -0.0053 | 0.0057  | -0.0165 | 0.0037  | 0.0106  | 0.0118  |
| AT.           | 13 | O  | X | 0.0421  | 0.0004  | 0.0140  | -0.0024 | -0.0307 | 0.0157  |
|               |    |    | Y | 0.0091  | -0.0005 | -0.0102 | 0.0219  | -0.0042 | 0.0150  |
|               |    |    | Z | 0.0036  | -0.0335 | -0.0179 | -0.0216 | 0.0403  | 0.0100  |
| AT.           | 14 | O  | X | -0.0421 | -0.0004 | -0.0140 | -0.0024 | -0.0307 | -0.0157 |
|               |    |    | Y | 0.0091  | -0.0005 | -0.0102 | -0.0219 | 0.0042  | 0.0150  |
|               |    |    | Z | -0.0036 | 0.0335  | 0.0179  | -0.0216 | 0.0403  | -0.0100 |
| AT.           | 15 | O  | X | 0.0421  | 0.0004  | -0.0140 | 0.0024  | -0.0307 | -0.0157 |
|               |    |    | Y | 0.0091  | -0.0005 | 0.0102  | -0.0219 | -0.0042 | -0.0150 |
|               |    |    | Z | 0.0036  | -0.0335 | 0.0179  | 0.0216  | 0.0403  | -0.0100 |
| AT.           | 16 | O  | X | -0.0421 | -0.0004 | 0.0140  | 0.0024  | -0.0307 | 0.0157  |
|               |    |    | Y | 0.0091  | -0.0005 | 0.0102  | 0.0219  | 0.0042  | -0.0150 |
|               |    |    | Z | -0.0036 | 0.0335  | -0.0179 | 0.0216  | 0.0403  | 0.0100  |
| AT.           | 17 | O  | X | -0.0170 | 0.0123  | 0.0027  | 0.0196  | 0.0053  | 0.0204  |
|               |    |    | Y | 0.0252  | -0.0306 | -0.0057 | -0.0058 | 0.0137  | 0.0007  |
|               |    |    | Z | -0.0057 | 0.0113  | -0.0105 | -0.0032 | -0.0183 | 0.0092  |
| AT.           | 18 | O  | X | 0.0170  | -0.0123 | -0.0027 | 0.0196  | 0.0053  | -0.0204 |
|               |    |    | Y | 0.0252  | -0.0306 | -0.0057 | 0.0058  | -0.0137 | 0.0007  |
|               |    |    | Z | 0.0057  | -0.0113 | 0.0105  | -0.0032 | -0.0183 | -0.0092 |
| AT.           | 19 | O  | X | -0.0170 | 0.0123  | -0.0027 | -0.0196 | 0.0053  | -0.0204 |

|               |    |    |         |         |         |         |         |         |         |
|---------------|----|----|---------|---------|---------|---------|---------|---------|---------|
|               |    | Y  | 0.0252  | -0.0306 | 0.0057  | 0.0058  | 0.0137  | -0.0007 |         |
|               |    | Z  | -0.0057 | 0.0113  | 0.0105  | 0.0032  | -0.0183 | -0.0092 |         |
| AT.           | 20 | O  | X       | 0.0170  | -0.0123 | 0.0027  | -0.0196 | 0.0053  |         |
|               |    | Y  | 0.0252  | -0.0306 | 0.0057  | -0.0058 | -0.0137 | -0.0007 |         |
|               |    | Z  | 0.0057  | -0.0113 | -0.0105 | 0.0032  | -0.0183 | 0.0092  |         |
| AT.           | 21 | O  | X       | 0.0005  | 0.0076  | 0.0063  | 0.0108  | 0.0175  |         |
|               |    | Y  | -0.0236 | -0.0121 | -0.0163 | -0.0053 | 0.0209  | -0.0081 |         |
|               |    | Z  | 0.0162  | 0.0015  | -0.0215 | 0.0038  | 0.0290  | 0.0205  |         |
| AT.           | 22 | O  | X       | -0.0005 | -0.0076 | -0.0063 | 0.0108  | 0.0175  |         |
|               |    | Y  | -0.0236 | -0.0121 | -0.0163 | 0.0053  | -0.0209 | -0.0081 |         |
|               |    | Z  | -0.0162 | -0.0015 | 0.0215  | 0.0038  | 0.0290  | -0.0205 |         |
| AT.           | 23 | O  | X       | 0.0005  | 0.0076  | -0.0063 | -0.0108 | 0.0175  |         |
|               |    | Y  | -0.0236 | -0.0121 | 0.0163  | 0.0053  | 0.0209  | 0.0081  |         |
|               |    | Z  | 0.0162  | 0.0015  | 0.0215  | -0.0038 | 0.0290  | -0.0205 |         |
| AT.           | 24 | O  | X       | -0.0005 | -0.0076 | 0.0063  | -0.0108 | 0.0175  |         |
|               |    | Y  | -0.0236 | -0.0121 | 0.0163  | -0.0053 | -0.0209 | 0.0081  |         |
|               |    | Z  | -0.0162 | -0.0015 | -0.0215 | -0.0038 | 0.0290  | 0.0205  |         |
| AT.           | 25 | O  | X       | -0.0212 | -0.0027 | 0.0100  | 0.0022  | -0.0099 |         |
|               |    | Y  | -0.0068 | 0.0236  | -0.0092 | 0.0329  | -0.0148 | 0.0099  |         |
|               |    | Z  | 0.0016  | 0.0117  | -0.0165 | 0.0066  | -0.0004 | 0.0144  |         |
| AT.           | 26 | O  | X       | 0.0212  | 0.0027  | -0.0100 | 0.0022  | -0.0099 |         |
|               |    | Y  | -0.0068 | 0.0236  | -0.0092 | -0.0329 | 0.0148  | 0.0099  |         |
|               |    | Z  | -0.0016 | -0.0117 | 0.0165  | 0.0066  | -0.0004 | -0.0144 |         |
| AT.           | 27 | O  | X       | -0.0212 | -0.0027 | -0.0100 | -0.0022 | -0.0099 |         |
|               |    | Y  | -0.0068 | 0.0236  | 0.0092  | -0.0329 | -0.0148 | -0.0099 |         |
|               |    | Z  | 0.0016  | 0.0117  | 0.0165  | -0.0066 | -0.0004 | -0.0144 |         |
| AT.           | 28 | O  | X       | 0.0212  | 0.0027  | 0.0100  | -0.0022 | -0.0099 |         |
|               |    | Y  | -0.0068 | 0.0236  | 0.0092  | 0.0329  | 0.0148  | -0.0099 |         |
|               |    | Z  | -0.0016 | -0.0117 | -0.0165 | -0.0066 | -0.0004 | 0.0144  |         |
| FREQ (CM**-1) |    |    | 213.61  | 217.41  | 218.78  | 225.80  | 230.14  | 240.21  |         |
| AT.           | 1  | CA | X       | -0.0164 | 0.0044  | -0.0245 | 0.0022  | -0.0372 | 0.0163  |
|               |    | Y  | -0.0177 | -0.0047 | -0.0017 | 0.0103  | 0.0176  | 0.0040  |         |
|               |    | Z  | 0.0172  | -0.0115 | 0.0165  | 0.0222  | 0.0155  | -0.0170 |         |
| AT.           | 2  | CA | X       | -0.0164 | 0.0044  | 0.0245  | -0.0022 | -0.0372 | -0.0163 |
|               |    | Y  | 0.0177  | 0.0047  | -0.0017 | 0.0103  | -0.0176 | 0.0040  |         |
|               |    | Z  | 0.0172  | -0.0115 | -0.0165 | -0.0222 | 0.0155  | 0.0170  |         |
| AT.           | 3  | CA | X       | -0.0164 | -0.0044 | -0.0245 | 0.0022  | -0.0372 | -0.0163 |
|               |    | Y  | -0.0177 | 0.0047  | -0.0017 | 0.0103  | 0.0176  | -0.0040 |         |
|               |    | Z  | 0.0172  | 0.0115  | 0.0165  | 0.0222  | 0.0155  | 0.0170  |         |
| AT.           | 4  | CA | X       | -0.0164 | -0.0044 | 0.0245  | -0.0022 | -0.0372 | 0.0163  |
|               |    | Y  | 0.0177  | -0.0047 | -0.0017 | 0.0103  | -0.0176 | -0.0040 |         |
|               |    | Z  | 0.0172  | 0.0115  | -0.0165 | -0.0222 | 0.0155  | -0.0170 |         |
| AT.           | 5  | CA | X       | 0.0282  | -0.0161 | -0.0283 | 0.0099  | 0.0099  | -0.0098 |
|               |    | Y  | 0.0337  | -0.0015 | 0.0273  | -0.0175 | -0.0164 | 0.0084  |         |
|               |    | Z  | -0.0045 | 0.0259  | 0.0017  | -0.0242 | -0.0041 | -0.0099 |         |
| AT.           | 6  | CA | X       | 0.0282  | -0.0161 | 0.0283  | -0.0099 | 0.0099  | 0.0098  |
|               |    | Y  | -0.0337 | 0.0015  | 0.0273  | -0.0175 | 0.0164  | 0.0084  |         |
|               |    | Z  | -0.0045 | 0.0259  | -0.0017 | 0.0242  | -0.0041 | 0.0099  |         |
| AT.           | 7  | CA | X       | 0.0282  | 0.0161  | -0.0283 | 0.0099  | 0.0099  | 0.0098  |
|               |    | Y  | 0.0337  | 0.0015  | 0.0273  | -0.0175 | -0.0164 | -0.0084 |         |
|               |    | Z  | -0.0045 | -0.0259 | 0.0017  | -0.0242 | -0.0041 | 0.0099  |         |
| AT.           | 8  | CA | X       | 0.0282  | 0.0161  | 0.0283  | -0.0099 | 0.0099  | -0.0098 |
|               |    | Y  | -0.0337 | -0.0015 | 0.0273  | -0.0175 | 0.0164  | -0.0084 |         |
|               |    | Z  | -0.0045 | -0.0259 | -0.0017 | 0.0242  | -0.0041 | -0.0099 |         |
| AT.           | 9  | SI | X       | -0.0020 | 0.0065  | 0.0079  | 0.0075  | 0.0096  | 0.0149  |
|               |    | Y  | -0.0029 | -0.0055 | -0.0121 | 0.0056  | -0.0079 | -0.0069 |         |
|               |    | Z  | -0.0069 | 0.0242  | 0.0082  | 0.0224  | -0.0056 | 0.0080  |         |
| AT.           | 10 | SI | X       | -0.0020 | 0.0065  | -0.0079 | -0.0075 | 0.0096  | -0.0149 |
|               |    | Y  | 0.0029  | 0.0055  | -0.0121 | 0.0056  | 0.0079  | -0.0069 |         |
|               |    | Z  | -0.0069 | 0.0242  | -0.0082 | -0.0224 | -0.0056 | -0.0080 |         |
| AT.           | 11 | SI | X       | -0.0020 | -0.0065 | 0.0079  | 0.0075  | 0.0096  | -0.0149 |
|               |    | Y  | -0.0029 | 0.0055  | -0.0121 | 0.0056  | -0.0079 | 0.0069  |         |
|               |    | Z  | -0.0069 | -0.0242 | 0.0082  | 0.0224  | -0.0056 | -0.0080 |         |
| AT.           | 12 | SI | X       | -0.0020 | -0.0065 | -0.0079 | -0.0075 | 0.0096  | 0.0149  |
|               |    | Y  | 0.0029  | -0.0055 | -0.0121 | 0.0056  | 0.0079  | 0.0069  |         |
|               |    | Z  | -0.0069 | -0.0242 | -0.0082 | -0.0224 | -0.0056 | 0.0080  |         |
| AT.           | 13 | O  | X       | 0.0116  | 0.0200  | 0.0256  | -0.0130 | 0.0078  | 0.0312  |
|               |    | Y  | -0.0023 | -0.0022 | -0.0068 | 0.0038  | -0.0080 | -0.0017 |         |
|               |    | Z  | -0.0071 | 0.0149  | 0.0040  | 0.0179  | -0.0057 | 0.0094  |         |
| AT.           | 14 | O  | X       | 0.0116  | 0.0200  | -0.0256 | 0.0130  | 0.0078  | -0.0312 |
|               |    | Y  | 0.0023  | 0.0022  | -0.0068 | 0.0038  | 0.0080  | -0.0017 |         |
|               |    | Z  | -0.0071 | 0.0149  | -0.0040 | -0.0179 | -0.0057 | -0.0094 |         |
| AT.           | 15 | O  | X       | 0.0116  | -0.0200 | 0.0256  | -0.0130 | 0.0078  | -0.0312 |
|               |    | Y  | -0.0023 | 0.0022  | -0.0068 | 0.0038  | -0.0080 | 0.0017  |         |
|               |    | Z  | -0.0071 | -0.0149 | 0.0040  | 0.0179  | -0.0057 | -0.0094 |         |
| AT.           | 16 | O  | X       | 0.0116  | -0.0200 | -0.0256 | 0.0130  | 0.0078  | 0.0312  |
|               |    | Y  | 0.0023  | -0.0022 | -0.0068 | 0.0038  | 0.0080  | 0.0017  |         |

|     |    |     |         |         |         |         |         |         |
|-----|----|-----|---------|---------|---------|---------|---------|---------|
|     |    | Z   | -0.0071 | -0.0149 | -0.0040 | -0.0179 | -0.0057 | 0.0094  |
| AT. | 17 | O X | -0.0159 | 0.0046  | 0.0093  | 0.0157  | 0.0186  | 0.0170  |
|     |    | Y   | 0.0262  | 0.0060  | -0.0170 | -0.0087 | -0.0199 | 0.0140  |
|     |    | Z   | -0.0080 | 0.0206  | 0.0154  | 0.0155  | -0.0118 | -0.0214 |
| AT. | 18 | O X | -0.0159 | 0.0046  | -0.0093 | -0.0157 | 0.0186  | -0.0170 |
|     |    | Y   | -0.0262 | -0.0060 | -0.0170 | -0.0087 | 0.0199  | 0.0140  |
|     |    | Z   | -0.0080 | 0.0206  | -0.0154 | -0.0155 | -0.0118 | 0.0214  |
| AT. | 19 | O X | -0.0159 | -0.0046 | 0.0093  | 0.0157  | 0.0186  | -0.0170 |
|     |    | Y   | 0.0262  | -0.0060 | -0.0170 | -0.0087 | -0.0199 | -0.0140 |
|     |    | Z   | -0.0080 | -0.0206 | 0.0154  | 0.0155  | -0.0118 | 0.0214  |
| AT. | 20 | O X | -0.0159 | -0.0046 | -0.0093 | -0.0157 | 0.0186  | 0.0170  |
|     |    | Y   | -0.0262 | 0.0060  | -0.0170 | -0.0087 | 0.0199  | -0.0140 |
|     |    | Z   | -0.0080 | -0.0206 | -0.0154 | -0.0155 | -0.0118 | -0.0214 |
| AT. | 21 | O X | -0.0056 | 0.0161  | 0.0151  | 0.0146  | 0.0232  | 0.0304  |
|     |    | Y   | -0.0108 | -0.0228 | -0.0055 | -0.0015 | 0.0000  | -0.0182 |
|     |    | Z   | -0.0043 | 0.0404  | 0.0134  | 0.0303  | 0.0065  | 0.0289  |
| AT. | 22 | O X | -0.0056 | 0.0161  | -0.0151 | -0.0146 | 0.0232  | -0.0304 |
|     |    | Y   | 0.0108  | 0.0228  | -0.0055 | -0.0015 | -0.0000 | -0.0182 |
|     |    | Z   | -0.0043 | 0.0404  | -0.0134 | -0.0303 | 0.0065  | -0.0289 |
| AT. | 23 | O X | -0.0056 | -0.0161 | 0.0151  | 0.0146  | 0.0232  | -0.0304 |
|     |    | Y   | -0.0108 | 0.0228  | -0.0055 | -0.0015 | 0.0000  | 0.0182  |
|     |    | Z   | -0.0043 | -0.0404 | 0.0134  | 0.0303  | 0.0065  | -0.0289 |
| AT. | 24 | O X | -0.0056 | -0.0161 | -0.0151 | -0.0146 | 0.0232  | 0.0304  |
|     |    | Y   | 0.0108  | -0.0228 | -0.0055 | -0.0015 | -0.0000 | 0.0182  |
|     |    | Z   | -0.0043 | -0.0404 | -0.0134 | -0.0303 | 0.0065  | 0.0289  |
| AT. | 25 | O X | -0.0157 | -0.0023 | 0.0041  | -0.0000 | 0.0018  | -0.0182 |
|     |    | Y   | 0.0050  | 0.0105  | -0.0136 | 0.0144  | -0.0193 | -0.0268 |
|     |    | Z   | -0.0001 | 0.0333  | 0.0088  | 0.0303  | -0.0079 | 0.0042  |
| AT. | 26 | O X | -0.0157 | -0.0023 | -0.0041 | 0.0000  | 0.0018  | 0.0182  |
|     |    | Y   | -0.0050 | -0.0105 | -0.0136 | 0.0144  | 0.0193  | -0.0268 |
|     |    | Z   | -0.0001 | 0.0333  | -0.0088 | -0.0303 | -0.0079 | -0.0042 |
| AT. | 27 | O X | -0.0157 | 0.0023  | 0.0041  | -0.0000 | 0.0018  | 0.0182  |
|     |    | Y   | 0.0050  | -0.0105 | -0.0136 | 0.0144  | -0.0193 | 0.0268  |
|     |    | Z   | -0.0001 | -0.0333 | 0.0088  | 0.0303  | -0.0079 | -0.0042 |
| AT. | 28 | O X | -0.0157 | 0.0023  | -0.0041 | 0.0000  | 0.0018  | -0.0182 |
|     |    | Y   | -0.0050 | 0.0105  | -0.0136 | 0.0144  | 0.0193  | 0.0268  |
|     |    | Z   | -0.0001 | -0.0333 | -0.0088 | -0.0303 | -0.0079 | 0.0042  |

|               |    |      |         |         |         |         |         |         |
|---------------|----|------|---------|---------|---------|---------|---------|---------|
| FREQ (CM**-1) |    |      | 247.98  | 251.48  | 252.38  | 256.55  | 257.40  | 264.62  |
| AT.           | 1  | CA X | 0.0113  | -0.0075 | -0.0183 | 0.0226  | -0.0079 | -0.0129 |
|               |    | Y    | 0.0103  | -0.0042 | -0.0177 | 0.0170  | 0.0350  | -0.0038 |
|               |    | Z    | -0.0021 | -0.0115 | -0.0004 | -0.0014 | -0.0045 | -0.0172 |
| AT.           | 2  | CA X | 0.0113  | 0.0075  | -0.0183 | 0.0226  | 0.0079  | -0.0129 |
|               |    | Y    | -0.0103 | -0.0042 | 0.0177  | -0.0170 | 0.0350  | 0.0038  |
|               |    | Z    | -0.0021 | 0.0115  | -0.0004 | -0.0014 | 0.0045  | -0.0172 |
| AT.           | 3  | CA X | -0.0113 | 0.0075  | -0.0183 | -0.0226 | -0.0079 | -0.0129 |
|               |    | Y    | -0.0103 | 0.0042  | -0.0177 | -0.0170 | 0.0350  | -0.0038 |
|               |    | Z    | 0.0021  | 0.0115  | -0.0004 | 0.0014  | -0.0045 | -0.0172 |
| AT.           | 4  | CA X | -0.0113 | -0.0075 | -0.0183 | -0.0226 | 0.0079  | -0.0129 |
|               |    | Y    | 0.0103  | 0.0042  | 0.0177  | 0.0170  | 0.0350  | 0.0038  |
|               |    | Z    | 0.0021  | -0.0115 | -0.0004 | 0.0014  | 0.0045  | -0.0172 |
| AT.           | 5  | CA X | 0.0005  | 0.0153  | -0.0127 | -0.0016 | 0.0028  | 0.0080  |
|               |    | Y    | -0.0214 | -0.0065 | 0.0085  | 0.0002  | -0.0084 | -0.0068 |
|               |    | Z    | 0.0265  | 0.0263  | -0.0066 | -0.0063 | -0.0062 | 0.0375  |
| AT.           | 6  | CA X | 0.0005  | -0.0153 | -0.0127 | -0.0016 | -0.0028 | 0.0080  |
|               |    | Y    | 0.0214  | -0.0065 | -0.0085 | -0.0002 | -0.0084 | 0.0068  |
|               |    | Z    | 0.0265  | -0.0263 | -0.0066 | -0.0063 | 0.0062  | 0.0375  |
| AT.           | 7  | CA X | -0.0005 | -0.0153 | -0.0127 | 0.0016  | 0.0028  | 0.0080  |
|               |    | Y    | 0.0214  | 0.0065  | 0.0085  | -0.0002 | -0.0084 | -0.0068 |
|               |    | Z    | -0.0265 | -0.0263 | -0.0066 | 0.0063  | -0.0062 | 0.0375  |
| AT.           | 8  | CA X | -0.0005 | 0.0153  | -0.0127 | 0.0016  | -0.0028 | 0.0080  |
|               |    | Y    | -0.0214 | 0.0065  | -0.0085 | 0.0002  | -0.0084 | 0.0068  |
|               |    | Z    | -0.0265 | 0.0263  | -0.0066 | 0.0063  | 0.0062  | 0.0375  |
| AT.           | 9  | SI X | 0.0099  | -0.0001 | 0.0116  | -0.0043 | 0.0079  | 0.0032  |
|               |    | Y    | -0.0053 | 0.0126  | 0.0100  | 0.0001  | -0.0027 | 0.0012  |
|               |    | Z    | -0.0185 | -0.0132 | 0.0014  | 0.0162  | -0.0138 | -0.0053 |
| AT.           | 10 | SI X | 0.0099  | 0.0001  | 0.0116  | -0.0043 | -0.0079 | 0.0032  |
|               |    | Y    | 0.0053  | 0.0126  | -0.0100 | -0.0001 | -0.0027 | -0.0012 |
|               |    | Z    | -0.0185 | 0.0132  | 0.0014  | 0.0162  | 0.0138  | -0.0053 |
| AT.           | 11 | SI X | -0.0099 | 0.0001  | 0.0116  | 0.0043  | 0.0079  | 0.0032  |
|               |    | Y    | 0.0053  | -0.0126 | 0.0100  | -0.0001 | -0.0027 | 0.0012  |
|               |    | Z    | 0.0185  | 0.0132  | 0.0014  | -0.0162 | -0.0138 | -0.0053 |
| AT.           | 12 | SI X | -0.0099 | -0.0001 | 0.0116  | 0.0043  | -0.0079 | 0.0032  |
|               |    | Y    | -0.0053 | -0.0126 | -0.0100 | 0.0001  | -0.0027 | -0.0012 |
|               |    | Z    | 0.0185  | -0.0132 | 0.0014  | -0.0162 | 0.0138  | -0.0053 |
| AT.           | 13 | O X  | 0.0235  | -0.0145 | 0.0119  | -0.0157 | -0.0067 | 0.0085  |
|               |    | Y    | -0.0056 | 0.0106  | 0.0065  | -0.0040 | -0.0078 | 0.0047  |
|               |    | Z    | 0.0125  | -0.0260 | 0.0203  | 0.0250  | 0.0002  | -0.0221 |

|     |    |   |   |         |         |         |         |         |         |
|-----|----|---|---|---------|---------|---------|---------|---------|---------|
| AT. | 14 | O | X | 0.0235  | 0.0145  | 0.0119  | -0.0157 | 0.0067  | 0.0085  |
|     |    |   | Y | 0.0056  | 0.0106  | -0.0065 | 0.0040  | -0.0078 | -0.0047 |
|     |    |   | Z | 0.0125  | 0.0260  | 0.0203  | 0.0250  | -0.0002 | -0.0221 |
| AT. | 15 | O | X | -0.0235 | 0.0145  | 0.0119  | 0.0157  | -0.0067 | 0.0085  |
|     |    |   | Y | 0.0056  | -0.0106 | 0.0065  | 0.0040  | -0.0078 | 0.0047  |
|     |    |   | Z | -0.0125 | 0.0260  | 0.0203  | -0.0250 | 0.0002  | -0.0221 |
| AT. | 16 | O | X | -0.0235 | -0.0145 | 0.0119  | 0.0157  | 0.0067  | 0.0085  |
|     |    |   | Y | -0.0056 | -0.0106 | -0.0065 | -0.0040 | -0.0078 | -0.0047 |
|     |    |   | Z | -0.0125 | -0.0260 | 0.0203  | -0.0250 | -0.0002 | -0.0221 |
| AT. | 17 | O | X | 0.0023  | 0.0130  | 0.0163  | 0.0117  | 0.0154  | -0.0089 |
|     |    |   | Y | 0.0039  | 0.0060  | -0.0071 | -0.0400 | -0.0215 | 0.0052  |
|     |    |   | Z | -0.0030 | -0.0364 | 0.0150  | 0.0267  | -0.0059 | 0.0127  |
| AT. | 18 | O | X | 0.0023  | -0.0130 | 0.0163  | 0.0117  | -0.0154 | -0.0089 |
|     |    |   | Y | -0.0039 | 0.0060  | 0.0071  | 0.0400  | -0.0215 | -0.0052 |
|     |    |   | Z | -0.0030 | 0.0364  | 0.0150  | 0.0267  | 0.0059  | 0.0127  |
| AT. | 19 | O | X | -0.0023 | -0.0130 | 0.0163  | -0.0117 | 0.0154  | -0.0089 |
|     |    |   | Y | -0.0039 | -0.0060 | -0.0071 | 0.0400  | -0.0215 | 0.0052  |
|     |    |   | Z | 0.0030  | 0.0364  | 0.0150  | -0.0267 | -0.0059 | 0.0127  |
| AT. | 20 | O | X | -0.0023 | 0.0130  | 0.0163  | -0.0117 | -0.0154 | -0.0089 |
|     |    |   | Y | 0.0039  | -0.0060 | 0.0071  | -0.0400 | -0.0215 | -0.0052 |
|     |    |   | Z | 0.0030  | -0.0364 | 0.0150  | -0.0267 | 0.0059  | 0.0127  |
| AT. | 21 | O | X | 0.0116  | 0.0229  | -0.0013 | -0.0142 | 0.0131  | -0.0116 |
|     |    |   | Y | 0.0077  | 0.0139  | 0.0418  | 0.0219  | 0.0010  | -0.0129 |
|     |    |   | Z | -0.0125 | 0.0130  | -0.0214 | -0.0046 | -0.0063 | -0.0206 |
| AT. | 22 | O | X | 0.0116  | -0.0229 | -0.0013 | -0.0142 | -0.0131 | -0.0116 |
|     |    |   | Y | -0.0077 | 0.0139  | -0.0418 | -0.0219 | 0.0010  | 0.0129  |
|     |    |   | Z | -0.0125 | -0.0130 | -0.0214 | -0.0046 | 0.0063  | -0.0206 |
| AT. | 23 | O | X | -0.0116 | -0.0229 | -0.0013 | 0.0142  | 0.0131  | -0.0116 |
|     |    |   | Y | -0.0077 | -0.0139 | 0.0418  | -0.0219 | 0.0010  | -0.0129 |
|     |    |   | Z | 0.0125  | -0.0130 | -0.0214 | 0.0046  | -0.0063 | -0.0206 |
| AT. | 24 | O | X | -0.0116 | 0.0229  | -0.0013 | 0.0142  | -0.0131 | -0.0116 |
|     |    |   | Y | 0.0077  | -0.0139 | -0.0418 | 0.0219  | 0.0010  | 0.0129  |
|     |    |   | Z | 0.0125  | 0.0130  | -0.0214 | 0.0046  | 0.0063  | -0.0206 |
| AT. | 25 | O | X | 0.0050  | -0.0182 | 0.0301  | 0.0252  | 0.0169  | 0.0187  |
|     |    |   | Y | -0.0356 | 0.0036  | 0.0219  | -0.0051 | -0.0336 | 0.0004  |
|     |    |   | Z | -0.0293 | -0.0146 | 0.0012  | 0.0064  | -0.0286 | -0.0117 |
| AT. | 26 | O | X | 0.0050  | 0.0182  | 0.0301  | 0.0252  | -0.0169 | 0.0187  |
|     |    |   | Y | 0.0356  | 0.0036  | -0.0219 | 0.0051  | -0.0336 | -0.0004 |
|     |    |   | Z | -0.0293 | 0.0146  | 0.0012  | 0.0064  | 0.0286  | -0.0117 |
| AT. | 27 | O | X | -0.0050 | 0.0182  | 0.0301  | -0.0252 | 0.0169  | 0.0187  |
|     |    |   | Y | 0.0356  | -0.0036 | 0.0219  | 0.0051  | -0.0336 | 0.0004  |
|     |    |   | Z | 0.0293  | 0.0146  | 0.0012  | -0.0064 | -0.0286 | -0.0117 |
| AT. | 28 | O | X | -0.0050 | -0.0182 | 0.0301  | -0.0252 | -0.0169 | 0.0187  |
|     |    |   | Y | -0.0356 | -0.0036 | -0.0219 | -0.0051 | -0.0336 | -0.0004 |
|     |    |   | Z | 0.0293  | -0.0146 | 0.0012  | -0.0064 | 0.0286  | -0.0117 |

|                |    |    |   |         |         |         |         |         |         |
|----------------|----|----|---|---------|---------|---------|---------|---------|---------|
| FREQ (CM** -1) |    |    |   | 265.88  | 271.60  | 273.61  | 274.80  | 278.33  | 286.05  |
| AT.            | 1  | CA | X | 0.0331  | 0.0132  | -0.0114 | -0.0178 | 0.0121  | 0.0210  |
|                |    |    | Y | 0.0133  | 0.0132  | 0.0193  | -0.0167 | -0.0268 | 0.0037  |
|                |    |    | Z | -0.0086 | -0.0006 | 0.0116  | 0.0025  | 0.0012  | -0.0115 |
| AT.            | 2  | CA | X | -0.0331 | -0.0132 | -0.0114 | 0.0178  | -0.0121 | 0.0210  |
|                |    |    | Y | 0.0133  | 0.0132  | -0.0193 | -0.0167 | -0.0268 | -0.0037 |
|                |    |    | Z | 0.0086  | 0.0006  | 0.0116  | -0.0025 | -0.0012 | -0.0115 |
| AT.            | 3  | CA | X | -0.0331 | 0.0132  | 0.0114  | -0.0178 | -0.0121 | -0.0210 |
|                |    |    | Y | -0.0133 | 0.0132  | -0.0193 | -0.0167 | 0.0268  | -0.0037 |
|                |    |    | Z | 0.0086  | -0.0006 | -0.0116 | 0.0025  | -0.0012 | 0.0115  |
| AT.            | 4  | CA | X | 0.0331  | -0.0132 | 0.0114  | 0.0178  | 0.0121  | -0.0210 |
|                |    |    | Y | -0.0133 | 0.0132  | 0.0193  | -0.0167 | 0.0268  | 0.0037  |
|                |    |    | Z | -0.0086 | 0.0006  | -0.0116 | -0.0025 | 0.0012  | 0.0115  |
| AT.            | 5  | CA | X | 0.0024  | -0.0007 | 0.0001  | 0.0059  | 0.0001  | -0.0179 |
|                |    |    | Y | -0.0053 | 0.0029  | 0.0174  | -0.0089 | -0.0071 | 0.0128  |
|                |    |    | Z | 0.0079  | 0.0253  | 0.0078  | 0.0148  | -0.0119 | -0.0179 |
| AT.            | 6  | CA | X | -0.0024 | 0.0007  | 0.0001  | -0.0059 | -0.0001 | -0.0179 |
|                |    |    | Y | -0.0053 | 0.0029  | -0.0174 | -0.0089 | -0.0071 | -0.0128 |
|                |    |    | Z | -0.0079 | -0.0253 | 0.0078  | -0.0148 | 0.0119  | -0.0179 |
| AT.            | 7  | CA | X | -0.0024 | -0.0007 | -0.0001 | 0.0059  | -0.0001 | 0.0179  |
|                |    |    | Y | 0.0053  | 0.0029  | -0.0174 | -0.0089 | 0.0071  | -0.0128 |
|                |    |    | Z | -0.0079 | 0.0253  | -0.0078 | 0.0148  | 0.0119  | 0.0179  |
| AT.            | 8  | CA | X | 0.0024  | 0.0007  | -0.0001 | -0.0059 | 0.0001  | 0.0179  |
|                |    |    | Y | 0.0053  | 0.0029  | 0.0174  | -0.0089 | 0.0071  | 0.0128  |
|                |    |    | Z | 0.0079  | -0.0253 | -0.0078 | -0.0148 | -0.0119 | 0.0179  |
| AT.            | 9  | SI | X | 0.0079  | -0.0087 | -0.0054 | 0.0120  | 0.0142  | 0.0068  |
|                |    |    | Y | -0.0004 | -0.0041 | -0.0208 | 0.0081  | 0.0141  | -0.0059 |
|                |    |    | Z | -0.0077 | 0.0174  | 0.0034  | 0.0007  | -0.0024 | -0.0094 |
| AT.            | 10 | SI | X | -0.0079 | 0.0087  | -0.0054 | -0.0120 | -0.0142 | 0.0068  |
|                |    |    | Y | -0.0004 | -0.0041 | 0.0208  | 0.0081  | 0.0141  | 0.0059  |
|                |    |    | Z | 0.0077  | -0.0174 | 0.0034  | -0.0007 | 0.0024  | -0.0094 |
| AT.            | 11 | SI | X | -0.0079 | -0.0087 | 0.0054  | 0.0120  | -0.0142 | -0.0068 |

|     |    |      |         |         |         |         |         |         |
|-----|----|------|---------|---------|---------|---------|---------|---------|
|     |    | Y    | 0.0004  | -0.0041 | 0.0208  | 0.0081  | -0.0141 | 0.0059  |
|     |    | Z    | 0.0077  | 0.0174  | -0.0034 | 0.0007  | 0.0024  | 0.0094  |
| AT. | 12 | SI X | 0.0079  | 0.0087  | 0.0054  | -0.0120 | 0.0142  | -0.0068 |
|     |    | Y    | 0.0004  | -0.0041 | -0.0208 | 0.0081  | -0.0141 | -0.0059 |
|     |    | Z    | -0.0077 | -0.0174 | -0.0034 | -0.0007 | -0.0024 | 0.0094  |
| AT. | 13 | O X  | -0.0061 | -0.0085 | -0.0095 | -0.0078 | 0.0136  | 0.0191  |
|     |    | Y    | -0.0050 | -0.0036 | -0.0161 | 0.0005  | 0.0132  | -0.0026 |
|     |    | Z    | 0.0008  | 0.0208  | -0.0259 | 0.0302  | 0.0002  | -0.0154 |
| AT. | 14 | O X  | 0.0061  | 0.0085  | -0.0095 | 0.0078  | -0.0136 | 0.0191  |
|     |    | Y    | -0.0050 | -0.0036 | 0.0161  | 0.0005  | 0.0132  | 0.0026  |
|     |    | Z    | -0.0008 | -0.0208 | -0.0259 | -0.0302 | -0.0002 | -0.0154 |
| AT. | 15 | O X  | 0.0061  | -0.0085 | 0.0095  | -0.0078 | -0.0136 | -0.0191 |
|     |    | Y    | 0.0050  | -0.0036 | 0.0161  | 0.0005  | -0.0132 | 0.0026  |
|     |    | Z    | -0.0008 | 0.0208  | 0.0259  | 0.0302  | -0.0002 | 0.0154  |
| AT. | 16 | O X  | -0.0061 | 0.0085  | 0.0095  | 0.0078  | 0.0136  | -0.0191 |
|     |    | Y    | 0.0050  | -0.0036 | -0.0161 | 0.0005  | -0.0132 | -0.0026 |
|     |    | Z    | 0.0008  | -0.0208 | 0.0259  | -0.0302 | 0.0002  | 0.0154  |
| AT. | 17 | O X  | 0.0199  | -0.0078 | -0.0091 | 0.0188  | 0.0055  | 0.0216  |
|     |    | Y    | -0.0292 | 0.0133  | -0.0180 | 0.0150  | 0.0310  | -0.0120 |
|     |    | Z    | 0.0025  | -0.0120 | 0.0102  | -0.0203 | 0.0024  | -0.0293 |
| AT. | 18 | O X  | -0.0199 | 0.0078  | -0.0091 | -0.0188 | -0.0055 | 0.0216  |
|     |    | Y    | -0.0292 | 0.0133  | 0.0180  | 0.0150  | 0.0310  | 0.0120  |
|     |    | Z    | -0.0025 | 0.0120  | 0.0102  | 0.0203  | -0.0024 | -0.0293 |
| AT. | 19 | O X  | -0.0199 | -0.0078 | 0.0091  | 0.0188  | -0.0055 | -0.0216 |
|     |    | Y    | 0.0292  | 0.0133  | 0.0180  | 0.0150  | -0.0310 | 0.0120  |
|     |    | Z    | -0.0025 | -0.0120 | -0.0102 | -0.0203 | -0.0024 | 0.0293  |
| AT. | 20 | O X  | 0.0199  | 0.0078  | 0.0091  | -0.0188 | 0.0055  | -0.0216 |
|     |    | Y    | 0.0292  | 0.0133  | -0.0180 | 0.0150  | -0.0310 | -0.0120 |
|     |    | Z    | 0.0025  | 0.0120  | -0.0102 | 0.0203  | 0.0024  | 0.0293  |
| AT. | 21 | O X  | 0.0027  | 0.0030  | -0.0035 | 0.0200  | 0.0125  | 0.0226  |
|     |    | Y    | -0.0160 | -0.0112 | -0.0315 | 0.0392  | 0.0187  | -0.0134 |
|     |    | Z    | -0.0207 | 0.0322  | 0.0090  | 0.0024  | -0.0062 | 0.0032  |
| AT. | 22 | O X  | -0.0027 | -0.0030 | -0.0035 | -0.0200 | -0.0125 | 0.0226  |
|     |    | Y    | 0.0160  | -0.0112 | 0.0315  | 0.0392  | 0.0187  | 0.0134  |
|     |    | Z    | 0.0207  | -0.0322 | 0.0090  | -0.0024 | 0.0062  | 0.0032  |
| AT. | 23 | O X  | -0.0027 | 0.0030  | 0.0035  | 0.0200  | -0.0125 | -0.0226 |
|     |    | Y    | -0.0160 | -0.0112 | 0.0315  | 0.0392  | -0.0187 | 0.0134  |
|     |    | Z    | 0.0207  | 0.0322  | -0.0090 | 0.0024  | 0.0062  | -0.0032 |
| AT. | 24 | O X  | 0.0027  | -0.0030 | 0.0035  | -0.0200 | 0.0125  | -0.0226 |
|     |    | Y    | -0.0160 | -0.0112 | -0.0315 | 0.0392  | -0.0187 | -0.0134 |
|     |    | Z    | -0.0207 | -0.0322 | -0.0090 | -0.0024 | -0.0062 | -0.0032 |
| AT. | 25 | O X  | 0.0316  | -0.0252 | -0.0007 | 0.0121  | 0.0188  | -0.0023 |
|     |    | Y    | -0.0062 | -0.0317 | -0.0296 | -0.0049 | 0.0337  | -0.0024 |
|     |    | Z    | -0.0147 | 0.0049  | -0.0082 | -0.0081 | 0.0050  | -0.0039 |
| AT. | 26 | O X  | -0.0316 | 0.0252  | -0.0007 | -0.0121 | -0.0188 | -0.0023 |
|     |    | Y    | -0.0062 | -0.0317 | 0.0296  | -0.0049 | 0.0337  | 0.0024  |
|     |    | Z    | 0.0147  | -0.0049 | -0.0082 | 0.0081  | -0.0050 | -0.0039 |
| AT. | 27 | O X  | -0.0316 | -0.0252 | 0.0007  | 0.0121  | -0.0188 | 0.0023  |
|     |    | Y    | 0.0062  | -0.0317 | 0.0296  | -0.0049 | -0.0337 | 0.0024  |
|     |    | Z    | 0.0147  | 0.0049  | 0.0082  | -0.0081 | -0.0050 | 0.0039  |
| AT. | 28 | O X  | 0.0316  | 0.0252  | 0.0007  | -0.0121 | 0.0188  | 0.0023  |
|     |    | Y    | 0.0062  | -0.0317 | -0.0296 | -0.0049 | -0.0337 | -0.0024 |
|     |    | Z    | -0.0147 | -0.0049 | 0.0082  | 0.0081  | 0.0050  | 0.0039  |

| FREQ (CM**-1) |   |      | 286.08  | 293.30  | 297.46  | 303.09  | 311.94  | 313.91  |
|---------------|---|------|---------|---------|---------|---------|---------|---------|
| AT.           | 1 | CA X | -0.0036 | 0.0059  | -0.0047 | -0.0013 | -0.0075 | 0.0005  |
|               |   | Y    | 0.0066  | -0.0039 | 0.0031  | -0.0033 | 0.0064  | -0.0223 |
|               |   | Z    | -0.0068 | 0.0068  | -0.0206 | -0.0013 | -0.0179 | 0.0038  |
| AT.           | 2 | CA X | -0.0036 | 0.0059  | 0.0047  | 0.0013  | -0.0075 | 0.0005  |
|               |   | Y    | -0.0066 | 0.0039  | 0.0031  | -0.0033 | -0.0064 | 0.0223  |
|               |   | Z    | -0.0068 | 0.0068  | 0.0206  | 0.0013  | -0.0179 | 0.0038  |
| AT.           | 3 | CA X | -0.0036 | -0.0059 | -0.0047 | 0.0013  | 0.0075  | 0.0005  |
|               |   | Y    | 0.0066  | 0.0039  | 0.0031  | 0.0033  | -0.0064 | -0.0223 |
|               |   | Z    | -0.0068 | -0.0068 | -0.0206 | 0.0013  | 0.0179  | 0.0038  |
| AT.           | 4 | CA X | -0.0036 | -0.0059 | 0.0047  | -0.0013 | 0.0075  | 0.0005  |
|               |   | Y    | -0.0066 | -0.0039 | 0.0031  | 0.0033  | 0.0064  | 0.0223  |
|               |   | Z    | -0.0068 | -0.0068 | 0.0206  | -0.0013 | 0.0179  | 0.0038  |
| AT.           | 5 | CA X | 0.0182  | 0.0064  | -0.0022 | 0.0069  | 0.0108  | 0.0105  |
|               |   | Y    | -0.0109 | -0.0067 | -0.0061 | -0.0096 | -0.0221 | -0.0331 |
|               |   | Z    | -0.0211 | -0.0117 | 0.0116  | -0.0175 | -0.0187 | -0.0021 |
| AT.           | 6 | CA X | 0.0182  | 0.0064  | 0.0022  | -0.0069 | 0.0108  | 0.0105  |
|               |   | Y    | 0.0109  | 0.0067  | -0.0061 | -0.0096 | 0.0221  | 0.0331  |
|               |   | Z    | -0.0211 | -0.0117 | -0.0116 | 0.0175  | -0.0187 | -0.0021 |
| AT.           | 7 | CA X | 0.0182  | -0.0064 | -0.0022 | -0.0069 | -0.0108 | 0.0105  |
|               |   | Y    | -0.0109 | 0.0067  | -0.0061 | 0.0096  | 0.0221  | -0.0331 |
|               |   | Z    | -0.0211 | 0.0117  | 0.0116  | 0.0175  | 0.0187  | -0.0021 |
| AT.           | 8 | CA X | 0.0182  | -0.0064 | 0.0022  | 0.0069  | -0.0108 | 0.0105  |
|               |   | Y    | 0.0109  | -0.0067 | -0.0061 | 0.0096  | -0.0221 | 0.0331  |



|               |    |      |         |         |         |         |         |         |
|---------------|----|------|---------|---------|---------|---------|---------|---------|
|               |    | Z    | -0.0211 | 0.0117  | -0.0116 | -0.0175 | 0.0187  | -0.0021 |
| AT.           | 9  | SI X | -0.0045 | 0.0164  | 0.0032  | -0.0091 | -0.0056 | -0.0050 |
|               |    | Y    | -0.0043 | -0.0056 | 0.0031  | 0.0023  | -0.0132 | 0.0022  |
|               |    | Z    | 0.0092  | 0.0004  | 0.0248  | 0.0128  | 0.0052  | -0.0018 |
| AT.           | 10 | SI X | -0.0045 | 0.0164  | -0.0032 | 0.0091  | -0.0056 | -0.0050 |
|               |    | Y    | 0.0043  | 0.0056  | 0.0031  | 0.0023  | 0.0132  | -0.0022 |
|               |    | Z    | 0.0092  | 0.0004  | -0.0248 | -0.0128 | 0.0052  | -0.0018 |
| AT.           | 11 | SI X | -0.0045 | -0.0164 | 0.0032  | 0.0091  | 0.0056  | -0.0050 |
|               |    | Y    | -0.0043 | 0.0056  | 0.0031  | -0.0023 | 0.0132  | 0.0022  |
|               |    | Z    | 0.0092  | -0.0004 | 0.0248  | -0.0128 | -0.0052 | -0.0018 |
| AT.           | 12 | SI X | -0.0045 | -0.0164 | -0.0032 | -0.0091 | 0.0056  | -0.0050 |
|               |    | Y    | 0.0043  | -0.0056 | 0.0031  | -0.0023 | -0.0132 | -0.0022 |
|               |    | Z    | 0.0092  | -0.0004 | -0.0248 | 0.0128  | -0.0052 | -0.0018 |
| AT.           | 13 | O X  | 0.0030  | 0.0311  | -0.0037 | -0.0288 | 0.0074  | 0.0103  |
|               |    | Y    | -0.0019 | -0.0001 | 0.0037  | -0.0031 | -0.0095 | 0.0094  |
|               |    | Z    | 0.0193  | -0.0127 | 0.0060  | 0.0353  | 0.0166  | -0.0023 |
| AT.           | 14 | O X  | 0.0030  | 0.0311  | 0.0037  | 0.0288  | 0.0074  | 0.0103  |
|               |    | Y    | 0.0019  | 0.0001  | 0.0037  | -0.0031 | 0.0095  | -0.0094 |
|               |    | Z    | 0.0193  | -0.0127 | -0.0060 | -0.0353 | 0.0166  | -0.0023 |
| AT.           | 15 | O X  | 0.0030  | -0.0311 | -0.0037 | 0.0288  | -0.0074 | 0.0103  |
|               |    | Y    | -0.0019 | 0.0001  | 0.0037  | 0.0031  | 0.0095  | 0.0094  |
|               |    | Z    | 0.0193  | 0.0127  | 0.0060  | -0.0353 | -0.0166 | -0.0023 |
| AT.           | 16 | O X  | 0.0030  | -0.0311 | 0.0037  | -0.0288 | -0.0074 | 0.0103  |
|               |    | Y    | 0.0019  | -0.0001 | 0.0037  | 0.0031  | -0.0095 | -0.0094 |
|               |    | Z    | 0.0193  | 0.0127  | -0.0060 | 0.0353  | -0.0166 | -0.0023 |
| AT.           | 17 | O X  | -0.0213 | -0.0059 | -0.0039 | 0.0100  | -0.0049 | -0.0066 |
|               |    | Y    | 0.0013  | 0.0102  | -0.0022 | -0.0096 | -0.0095 | 0.0108  |
|               |    | Z    | 0.0419  | 0.0302  | 0.0431  | -0.0146 | -0.0055 | -0.0107 |
| AT.           | 18 | O X  | -0.0213 | -0.0059 | 0.0039  | -0.0100 | -0.0049 | -0.0066 |
|               |    | Y    | -0.0013 | -0.0102 | -0.0022 | -0.0096 | 0.0095  | -0.0108 |
|               |    | Z    | 0.0419  | 0.0302  | -0.0431 | 0.0146  | -0.0055 | -0.0107 |
| AT.           | 19 | O X  | -0.0213 | 0.0059  | -0.0039 | -0.0100 | 0.0049  | -0.0066 |
|               |    | Y    | 0.0013  | -0.0102 | -0.0022 | 0.0096  | 0.0095  | 0.0108  |
|               |    | Z    | 0.0419  | -0.0302 | 0.0431  | 0.0146  | 0.0055  | -0.0107 |
| AT.           | 20 | O X  | -0.0213 | 0.0059  | 0.0039  | 0.0100  | 0.0049  | -0.0066 |
|               |    | Y    | -0.0013 | 0.0102  | -0.0022 | 0.0096  | -0.0095 | -0.0108 |
|               |    | Z    | 0.0419  | -0.0302 | -0.0431 | -0.0146 | 0.0055  | -0.0107 |
| AT.           | 21 | O X  | -0.0257 | -0.0107 | -0.0191 | -0.0002 | -0.0079 | -0.0002 |
|               |    | Y    | -0.0090 | -0.0325 | 0.0035  | 0.0399  | -0.0176 | 0.0149  |
|               |    | Z    | -0.0102 | -0.0258 | -0.0034 | 0.0159  | 0.0012  | 0.0020  |
| AT.           | 22 | O X  | -0.0257 | -0.0107 | 0.0191  | 0.0002  | -0.0079 | -0.0002 |
|               |    | Y    | 0.0090  | 0.0325  | 0.0035  | 0.0399  | 0.0176  | -0.0149 |
|               |    | Z    | -0.0102 | -0.0258 | 0.0034  | -0.0159 | 0.0012  | 0.0020  |
| AT.           | 23 | O X  | -0.0257 | 0.0107  | -0.0191 | 0.0002  | 0.0079  | -0.0002 |
|               |    | Y    | -0.0090 | 0.0325  | 0.0035  | -0.0399 | 0.0176  | 0.0149  |
|               |    | Z    | -0.0102 | 0.0258  | -0.0034 | -0.0159 | -0.0012 | 0.0020  |
| AT.           | 24 | O X  | -0.0257 | 0.0107  | 0.0191  | -0.0002 | 0.0079  | -0.0002 |
|               |    | Y    | 0.0090  | -0.0325 | 0.0035  | -0.0399 | -0.0176 | -0.0149 |
|               |    | Z    | -0.0102 | 0.0258  | 0.0034  | 0.0159  | -0.0012 | 0.0020  |
| AT.           | 25 | O X  | 0.0155  | 0.0301  | 0.0355  | -0.0097 | -0.0292 | -0.0224 |
|               |    | Y    | -0.0138 | 0.0121  | -0.0028 | -0.0127 | -0.0148 | 0.0184  |
|               |    | Z    | 0.0027  | 0.0043  | 0.0056  | 0.0049  | 0.0139  | 0.0100  |
| AT.           | 26 | O X  | 0.0155  | 0.0301  | -0.0355 | 0.0097  | -0.0292 | -0.0224 |
|               |    | Y    | 0.0138  | -0.0121 | -0.0028 | -0.0127 | 0.0148  | -0.0184 |
|               |    | Z    | 0.0027  | 0.0043  | -0.0056 | -0.0049 | 0.0139  | 0.0100  |
| AT.           | 27 | O X  | 0.0155  | -0.0301 | 0.0355  | 0.0097  | 0.0292  | -0.0224 |
|               |    | Y    | -0.0138 | -0.0121 | -0.0028 | 0.0127  | 0.0148  | 0.0184  |
|               |    | Z    | 0.0027  | -0.0043 | 0.0056  | -0.0049 | -0.0139 | 0.0100  |
| AT.           | 28 | O X  | 0.0155  | -0.0301 | -0.0355 | -0.0097 | 0.0292  | -0.0224 |
|               |    | Y    | 0.0138  | 0.0121  | -0.0028 | 0.0127  | -0.0148 | -0.0184 |
|               |    | Z    | 0.0027  | -0.0043 | -0.0056 | 0.0049  | -0.0139 | 0.0100  |
| FREQ (CM**-1) |    |      | 355.60  | 361.13  | 370.41  | 380.23  | 401.12  | 409.10  |
| AT.           | 1  | CA X | 0.0017  | -0.0040 | -0.0025 | -0.0057 | 0.0020  | -0.0000 |
|               |    | Y    | -0.0006 | -0.0096 | 0.0074  | -0.0008 | 0.0010  | 0.0027  |
|               |    | Z    | 0.0013  | 0.0055  | -0.0050 | 0.0053  | -0.0088 | -0.0018 |
| AT.           | 2  | CA X | -0.0017 | -0.0040 | 0.0025  | 0.0057  | 0.0020  | 0.0000  |
|               |    | Y    | -0.0006 | 0.0096  | 0.0074  | -0.0008 | -0.0010 | 0.0027  |
|               |    | Z    | -0.0013 | 0.0055  | 0.0050  | -0.0053 | -0.0088 | 0.0018  |
| AT.           | 3  | CA X | -0.0017 | -0.0040 | -0.0025 | -0.0057 | -0.0020 | 0.0000  |
|               |    | Y    | 0.0006  | -0.0096 | 0.0074  | -0.0008 | -0.0010 | -0.0027 |
|               |    | Z    | -0.0013 | 0.0055  | -0.0050 | 0.0053  | 0.0088  | 0.0018  |
| AT.           | 4  | CA X | 0.0017  | -0.0040 | 0.0025  | 0.0057  | -0.0020 | -0.0000 |
|               |    | Y    | 0.0006  | 0.0096  | 0.0074  | -0.0008 | 0.0010  | -0.0027 |
|               |    | Z    | 0.0013  | 0.0055  | 0.0050  | -0.0053 | 0.0088  | -0.0018 |
| AT.           | 5  | CA X | 0.0056  | -0.0080 | -0.0011 | -0.0003 | -0.0036 | 0.0019  |
|               |    | Y    | -0.0009 | -0.0065 | 0.0027  | 0.0054  | -0.0098 | 0.0034  |
|               |    | Z    | 0.0004  | -0.0074 | 0.0025  | 0.0007  | -0.0110 | -0.0002 |

|               |    |    |   |         |         |         |         |         |         |
|---------------|----|----|---|---------|---------|---------|---------|---------|---------|
| AT.           | 6  | CA | X | -0.0056 | -0.0080 | 0.0011  | 0.0003  | -0.0036 | -0.0019 |
|               |    |    | Y | -0.0009 | 0.0065  | 0.0027  | 0.0054  | 0.0098  | 0.0034  |
|               |    |    | Z | -0.0004 | -0.0074 | -0.0025 | -0.0007 | -0.0110 | 0.0002  |
| AT.           | 7  | CA | X | -0.0056 | -0.0080 | -0.0011 | -0.0003 | 0.0036  | -0.0019 |
|               |    |    | Y | 0.0009  | -0.0065 | 0.0027  | 0.0054  | 0.0098  | -0.0034 |
|               |    |    | Z | -0.0004 | -0.0074 | 0.0025  | 0.0007  | 0.0110  | 0.0002  |
| AT.           | 8  | CA | X | 0.0056  | -0.0080 | 0.0011  | 0.0003  | 0.0036  | 0.0019  |
|               |    |    | Y | 0.0009  | 0.0065  | 0.0027  | 0.0054  | -0.0098 | -0.0034 |
|               |    |    | Z | 0.0004  | -0.0074 | -0.0025 | -0.0007 | 0.0110  | -0.0002 |
| AT.           | 9  | SI | X | 0.0012  | 0.0091  | -0.0035 | 0.0088  | 0.0028  | 0.0007  |
|               |    |    | Y | -0.0044 | 0.0045  | -0.0035 | 0.0003  | 0.0018  | 0.0033  |
|               |    |    | Z | 0.0083  | -0.0002 | 0.0037  | -0.0032 | 0.0049  | -0.0002 |
| AT.           | 10 | SI | X | -0.0012 | 0.0091  | 0.0035  | -0.0088 | 0.0028  | -0.0007 |
|               |    |    | Y | -0.0044 | -0.0045 | -0.0035 | 0.0003  | -0.0018 | 0.0033  |
|               |    |    | Z | -0.0083 | -0.0002 | -0.0037 | 0.0032  | 0.0049  | 0.0002  |
| AT.           | 11 | SI | X | -0.0012 | 0.0091  | -0.0035 | 0.0088  | -0.0028 | -0.0007 |
|               |    |    | Y | 0.0044  | 0.0045  | -0.0035 | 0.0003  | -0.0018 | -0.0033 |
|               |    |    | Z | -0.0083 | -0.0002 | 0.0037  | -0.0032 | -0.0049 | 0.0002  |
| AT.           | 12 | SI | X | 0.0012  | 0.0091  | 0.0035  | -0.0088 | -0.0028 | 0.0007  |
|               |    |    | Y | 0.0044  | -0.0045 | -0.0035 | 0.0003  | 0.0018  | -0.0033 |
|               |    |    | Z | 0.0083  | -0.0002 | -0.0037 | 0.0032  | -0.0049 | -0.0002 |
| AT.           | 13 | O  | X | -0.0089 | -0.0285 | 0.0075  | -0.0265 | -0.0312 | -0.0345 |
|               |    |    | Y | -0.0016 | 0.0025  | -0.0089 | -0.0050 | -0.0043 | -0.0066 |
|               |    |    | Z | -0.0262 | -0.0129 | 0.0389  | 0.0018  | -0.0074 | 0.0179  |
| AT.           | 14 | O  | X | 0.0089  | -0.0285 | -0.0075 | 0.0265  | -0.0312 | 0.0345  |
|               |    |    | Y | -0.0016 | -0.0025 | -0.0089 | -0.0050 | 0.0043  | -0.0066 |
|               |    |    | Z | 0.0262  | -0.0129 | -0.0389 | -0.0018 | -0.0074 | -0.0179 |
| AT.           | 15 | O  | X | 0.0089  | -0.0285 | 0.0075  | -0.0265 | 0.0312  | 0.0345  |
|               |    |    | Y | 0.0016  | 0.0025  | -0.0089 | -0.0050 | 0.0043  | 0.0066  |
|               |    |    | Z | 0.0262  | -0.0129 | 0.0389  | 0.0018  | 0.0074  | -0.0179 |
| AT.           | 16 | O  | X | -0.0089 | -0.0285 | -0.0075 | 0.0265  | 0.0312  | -0.0345 |
|               |    |    | Y | 0.0016  | -0.0025 | -0.0089 | -0.0050 | -0.0043 | 0.0066  |
|               |    |    | Z | -0.0262 | -0.0129 | -0.0389 | -0.0018 | 0.0074  | 0.0179  |
| AT.           | 17 | O  | X | -0.0208 | -0.0079 | 0.0145  | -0.0011 | -0.0114 | -0.0043 |
|               |    |    | Y | 0.0195  | 0.0340  | -0.0207 | 0.0294  | 0.0281  | 0.0206  |
|               |    |    | Z | 0.0317  | 0.0083  | -0.0246 | -0.0117 | 0.0028  | -0.0139 |
| AT.           | 18 | O  | X | 0.0208  | -0.0079 | -0.0145 | 0.0011  | -0.0114 | 0.0043  |
|               |    |    | Y | 0.0195  | -0.0340 | -0.0207 | 0.0294  | -0.0281 | 0.0206  |
|               |    |    | Z | -0.0317 | 0.0083  | 0.0246  | 0.0117  | 0.0028  | 0.0139  |
| AT.           | 19 | O  | X | 0.0208  | -0.0079 | 0.0145  | -0.0011 | 0.0114  | 0.0043  |
|               |    |    | Y | -0.0195 | 0.0340  | -0.0207 | 0.0294  | -0.0281 | -0.0206 |
|               |    |    | Z | -0.0317 | 0.0083  | -0.0246 | -0.0117 | -0.0028 | 0.0139  |
| AT.           | 20 | O  | X | -0.0208 | -0.0079 | -0.0145 | 0.0011  | 0.0114  | -0.0043 |
|               |    |    | Y | -0.0195 | -0.0340 | -0.0207 | 0.0294  | 0.0281  | -0.0206 |
|               |    |    | Z | 0.0317  | 0.0083  | 0.0246  | 0.0117  | -0.0028 | -0.0139 |
| AT.           | 21 | O  | X | 0.0158  | 0.0207  | -0.0232 | 0.0019  | 0.0169  | 0.0041  |
|               |    |    | Y | 0.0191  | -0.0186 | -0.0120 | -0.0436 | -0.0035 | -0.0326 |
|               |    |    | Z | 0.0201  | 0.0172  | -0.0221 | 0.0008  | 0.0190  | 0.0111  |
| AT.           | 22 | O  | X | -0.0158 | 0.0207  | 0.0232  | -0.0019 | 0.0169  | -0.0041 |
|               |    |    | Y | 0.0191  | 0.0186  | -0.0120 | -0.0436 | 0.0035  | -0.0326 |
|               |    |    | Z | -0.0201 | 0.0172  | 0.0221  | -0.0008 | 0.0190  | -0.0111 |
| AT.           | 23 | O  | X | -0.0158 | 0.0207  | -0.0232 | 0.0019  | -0.0169 | -0.0041 |
|               |    |    | Y | -0.0191 | -0.0186 | -0.0120 | -0.0436 | 0.0035  | 0.0326  |
|               |    |    | Z | -0.0201 | 0.0172  | -0.0221 | 0.0008  | -0.0190 | -0.0111 |
| AT.           | 24 | O  | X | 0.0158  | 0.0207  | 0.0232  | -0.0019 | -0.0169 | 0.0041  |
|               |    |    | Y | -0.0191 | 0.0186  | -0.0120 | -0.0436 | -0.0035 | 0.0326  |
|               |    |    | Z | 0.0201  | 0.0172  | 0.0221  | -0.0008 | -0.0190 | 0.0111  |
| AT.           | 25 | O  | X | 0.0168  | 0.0298  | -0.0027 | 0.0297  | 0.0292  | 0.0318  |
|               |    |    | Y | -0.0325 | 0.0005  | 0.0225  | 0.0067  | -0.0173 | 0.0054  |
|               |    |    | Z | -0.0100 | -0.0074 | 0.0135  | -0.0021 | -0.0083 | -0.0091 |
| AT.           | 26 | O  | X | -0.0168 | 0.0298  | 0.0027  | -0.0297 | 0.0292  | -0.0318 |
|               |    |    | Y | -0.0325 | -0.0005 | 0.0225  | 0.0067  | 0.0173  | 0.0054  |
|               |    |    | Z | 0.0100  | -0.0074 | -0.0135 | 0.0021  | -0.0083 | 0.0091  |
| AT.           | 27 | O  | X | -0.0168 | 0.0298  | -0.0027 | 0.0297  | -0.0292 | -0.0318 |
|               |    |    | Y | 0.0325  | 0.0005  | 0.0225  | 0.0067  | 0.0173  | -0.0054 |
|               |    |    | Z | 0.0100  | -0.0074 | 0.0135  | -0.0021 | 0.0083  | 0.0091  |
| AT.           | 28 | O  | X | 0.0168  | 0.0298  | 0.0027  | -0.0297 | -0.0292 | 0.0318  |
|               |    |    | Y | 0.0325  | -0.0005 | 0.0225  | 0.0067  | -0.0173 | -0.0054 |
|               |    |    | Z | -0.0100 | -0.0074 | -0.0135 | 0.0021  | 0.0083  | -0.0091 |
| FREQ (CM**-1) |    |    |   | 412.23  | 425.77  | 475.74  | 478.89  | 491.89  | 496.20  |
| AT.           | 1  | CA | X | 0.0002  | -0.0022 | 0.0015  | 0.0029  | -0.0031 | 0.0006  |
|               |    |    | Y | -0.0033 | 0.0017  | 0.0019  | -0.0029 | -0.0003 | 0.0018  |
|               |    |    | Z | -0.0013 | 0.0013  | 0.0006  | 0.0023  | -0.0025 | -0.0006 |
| AT.           | 2  | CA | X | 0.0002  | -0.0022 | 0.0015  | -0.0029 | 0.0031  | 0.0006  |
|               |    |    | Y | 0.0033  | -0.0017 | -0.0019 | -0.0029 | -0.0003 | -0.0018 |
|               |    |    | Z | -0.0013 | 0.0013  | 0.0006  | -0.0023 | 0.0025  | -0.0006 |
| AT.           | 3  | CA | X | -0.0002 | -0.0022 | 0.0015  | 0.0029  | 0.0031  | 0.0006  |

|              |    |      |         |         |         |         |         |         |
|--------------|----|------|---------|---------|---------|---------|---------|---------|
|              |    | Y    | 0.0033  | 0.0017  | 0.0019  | -0.0029 | 0.0003  | 0.0018  |
|              |    | Z    | 0.0013  | 0.0013  | 0.0006  | 0.0023  | 0.0025  | -0.0006 |
| AT.          | 4  | CA X | -0.0002 | -0.0022 | 0.0015  | -0.0029 | -0.0031 | 0.0006  |
|              |    | Y    | -0.0033 | -0.0017 | -0.0019 | -0.0029 | 0.0003  | -0.0018 |
|              |    | Z    | 0.0013  | 0.0013  | 0.0006  | -0.0023 | -0.0025 | -0.0006 |
| AT.          | 5  | CA X | -0.0022 | -0.0010 | 0.0021  | -0.0009 | -0.0018 | -0.0038 |
|              |    | Y    | -0.0033 | -0.0045 | 0.0003  | -0.0009 | -0.0009 | -0.0009 |
|              |    | Z    | -0.0063 | 0.0007  | 0.0029  | 0.0012  | -0.0001 | 0.0027  |
| AT.          | 6  | CA X | -0.0022 | -0.0010 | 0.0021  | 0.0009  | 0.0018  | -0.0038 |
|              |    | Y    | 0.0033  | 0.0045  | -0.0003 | -0.0009 | -0.0009 | 0.0009  |
|              |    | Z    | -0.0063 | 0.0007  | 0.0029  | -0.0012 | 0.0001  | 0.0027  |
| AT.          | 7  | CA X | 0.0022  | -0.0010 | 0.0021  | -0.0009 | 0.0018  | -0.0038 |
|              |    | Y    | 0.0033  | -0.0045 | 0.0003  | -0.0009 | 0.0009  | -0.0009 |
|              |    | Z    | 0.0063  | 0.0007  | 0.0029  | 0.0012  | 0.0001  | 0.0027  |
| AT.          | 8  | CA X | 0.0022  | -0.0010 | 0.0021  | 0.0009  | -0.0018 | -0.0038 |
|              |    | Y    | -0.0033 | 0.0045  | -0.0003 | -0.0009 | 0.0009  | 0.0009  |
|              |    | Z    | 0.0063  | 0.0007  | 0.0029  | -0.0012 | -0.0001 | 0.0027  |
| AT.          | 9  | SI X | 0.0012  | 0.0048  | -0.0179 | -0.0236 | -0.0157 | 0.0177  |
|              |    | Y    | 0.0029  | -0.0090 | -0.0069 | 0.0036  | 0.0021  | -0.0024 |
|              |    | Z    | 0.0089  | 0.0016  | -0.0193 | -0.0057 | -0.0156 | -0.0166 |
| AT.          | 10 | SI X | 0.0012  | 0.0048  | -0.0179 | 0.0236  | 0.0157  | 0.0177  |
|              |    | Y    | -0.0029 | 0.0090  | 0.0069  | 0.0036  | 0.0021  | 0.0024  |
|              |    | Z    | 0.0089  | 0.0016  | -0.0193 | 0.0057  | 0.0156  | -0.0166 |
| AT.          | 11 | SI X | -0.0012 | 0.0048  | -0.0179 | -0.0236 | 0.0157  | 0.0177  |
|              |    | Y    | -0.0029 | -0.0090 | -0.0069 | 0.0036  | -0.0021 | -0.0024 |
|              |    | Z    | -0.0089 | 0.0016  | -0.0193 | -0.0057 | 0.0156  | -0.0166 |
| AT.          | 12 | SI X | -0.0012 | 0.0048  | -0.0179 | 0.0236  | -0.0157 | 0.0177  |
|              |    | Y    | 0.0029  | 0.0090  | 0.0069  | 0.0036  | -0.0021 | 0.0024  |
|              |    | Z    | -0.0089 | 0.0016  | -0.0193 | 0.0057  | -0.0156 | -0.0166 |
| AT.          | 13 | O X  | 0.0177  | -0.0079 | 0.0093  | 0.0109  | 0.0202  | -0.0077 |
|              |    | Y    | 0.0113  | -0.0117 | -0.0063 | 0.0095  | 0.0034  | -0.0109 |
|              |    | Z    | -0.0354 | 0.0263  | 0.0180  | 0.0074  | 0.0192  | 0.0165  |
| AT.          | 14 | O X  | 0.0177  | -0.0079 | 0.0093  | -0.0109 | -0.0202 | -0.0077 |
|              |    | Y    | -0.0113 | 0.0117  | 0.0063  | 0.0095  | 0.0034  | 0.0109  |
|              |    | Z    | -0.0354 | 0.0263  | 0.0180  | -0.0074 | -0.0192 | 0.0165  |
| AT.          | 15 | O X  | -0.0177 | -0.0079 | 0.0093  | 0.0109  | -0.0202 | -0.0077 |
|              |    | Y    | -0.0113 | -0.0117 | -0.0063 | 0.0095  | -0.0034 | -0.0109 |
|              |    | Z    | 0.0354  | 0.0263  | 0.0180  | 0.0074  | -0.0192 | 0.0165  |
| AT.          | 16 | O X  | -0.0177 | -0.0079 | 0.0093  | -0.0109 | 0.0202  | -0.0077 |
|              |    | Y    | 0.0113  | 0.0117  | 0.0063  | 0.0095  | -0.0034 | 0.0109  |
|              |    | Z    | 0.0354  | 0.0263  | 0.0180  | -0.0074 | 0.0192  | 0.0165  |
| AT.          | 17 | O X  | -0.0034 | 0.0120  | -0.0194 | -0.0085 | -0.0165 | -0.0051 |
|              |    | Y    | -0.0026 | 0.0076  | -0.0132 | -0.0168 | -0.0174 | 0.0046  |
|              |    | Z    | 0.0269  | -0.0295 | 0.0003  | -0.0090 | 0.0084  | 0.0245  |
| AT.          | 18 | O X  | -0.0034 | 0.0120  | -0.0194 | 0.0085  | 0.0165  | -0.0051 |
|              |    | Y    | 0.0026  | -0.0076 | 0.0132  | -0.0168 | -0.0174 | -0.0046 |
|              |    | Z    | 0.0269  | -0.0295 | 0.0003  | 0.0090  | -0.0084 | 0.0245  |
| AT.          | 19 | O X  | 0.0034  | 0.0120  | -0.0194 | -0.0085 | 0.0165  | -0.0051 |
|              |    | Y    | 0.0026  | 0.0076  | -0.0132 | -0.0168 | 0.0174  | 0.0046  |
|              |    | Z    | -0.0269 | -0.0295 | 0.0003  | -0.0090 | -0.0084 | 0.0245  |
| AT.          | 20 | O X  | 0.0034  | 0.0120  | -0.0194 | 0.0085  | -0.0165 | -0.0051 |
|              |    | Y    | -0.0026 | -0.0076 | 0.0132  | -0.0168 | 0.0174  | -0.0046 |
|              |    | Z    | -0.0269 | -0.0295 | 0.0003  | 0.0090  | 0.0084  | 0.0245  |
| AT.          | 21 | O X  | 0.0076  | -0.0169 | 0.0141  | 0.0017  | 0.0176  | 0.0190  |
|              |    | Y    | 0.0315  | -0.0286 | -0.0015 | -0.0012 | 0.0027  | -0.0066 |
|              |    | Z    | 0.0056  | -0.0189 | 0.0188  | 0.0295  | 0.0225  | -0.0168 |
| AT.          | 22 | O X  | 0.0076  | -0.0169 | 0.0141  | -0.0017 | -0.0176 | 0.0190  |
|              |    | Y    | -0.0315 | 0.0286  | 0.0015  | -0.0012 | 0.0027  | 0.0066  |
|              |    | Z    | 0.0056  | -0.0189 | 0.0188  | -0.0295 | -0.0225 | -0.0168 |
| AT.          | 23 | O X  | -0.0076 | -0.0169 | 0.0141  | 0.0017  | -0.0176 | 0.0190  |
|              |    | Y    | -0.0315 | -0.0286 | -0.0015 | -0.0012 | -0.0027 | -0.0066 |
|              |    | Z    | -0.0056 | -0.0189 | 0.0188  | 0.0295  | -0.0225 | -0.0168 |
| AT.          | 24 | O X  | -0.0076 | -0.0169 | 0.0141  | -0.0017 | 0.0176  | 0.0190  |
|              |    | Y    | 0.0315  | 0.0286  | 0.0015  | -0.0012 | -0.0027 | 0.0066  |
|              |    | Z    | -0.0056 | -0.0189 | 0.0188  | -0.0295 | 0.0225  | -0.0168 |
| AT.          | 25 | O X  | -0.0183 | 0.0126  | 0.0183  | 0.0288  | 0.0095  | -0.0291 |
|              |    | Y    | -0.0197 | 0.0191  | 0.0239  | 0.0117  | 0.0123  | 0.0076  |
|              |    | Z    | 0.0023  | 0.0144  | -0.0121 | -0.0166 | -0.0203 | -0.0004 |
| AT.          | 26 | O X  | -0.0183 | 0.0126  | 0.0183  | -0.0288 | -0.0095 | -0.0291 |
|              |    | Y    | 0.0197  | -0.0191 | -0.0239 | 0.0117  | 0.0123  | -0.0076 |
|              |    | Z    | 0.0023  | 0.0144  | -0.0121 | 0.0166  | 0.0203  | -0.0004 |
| AT.          | 27 | O X  | 0.0183  | 0.0126  | 0.0183  | 0.0288  | -0.0095 | -0.0291 |
|              |    | Y    | 0.0197  | 0.0191  | 0.0239  | 0.0117  | -0.0123 | 0.0076  |
|              |    | Z    | -0.0023 | 0.0144  | -0.0121 | -0.0166 | 0.0203  | -0.0004 |
| AT.          | 28 | O X  | 0.0183  | 0.0126  | 0.0183  | -0.0288 | 0.0095  | -0.0291 |
|              |    | Y    | -0.0197 | -0.0191 | -0.0239 | 0.0117  | -0.0123 | -0.0076 |
|              |    | Z    | -0.0023 | 0.0144  | -0.0121 | 0.0166  | -0.0203 | -0.0004 |
| FREQ (CM*-1) |    |      | 498.82  | 505.31  | 514.90  | 517.73  | 522.56  | 523.37  |

|     |    |    |   |         |         |         |         |         |         |
|-----|----|----|---|---------|---------|---------|---------|---------|---------|
| AT. | 1  | CA | X | 0.0004  | -0.0034 | -0.0046 | -0.0017 | 0.0024  | 0.0006  |
|     |    |    | Y | -0.0081 | 0.0023  | -0.0003 | 0.0009  | 0.0029  | 0.0089  |
|     |    |    | Z | -0.0010 | -0.0002 | -0.0025 | 0.0022  | -0.0063 | -0.0024 |
| AT. | 2  | CA | X | -0.0004 | -0.0034 | -0.0046 | 0.0017  | -0.0024 | 0.0006  |
|     |    |    | Y | -0.0081 | -0.0023 | 0.0003  | 0.0009  | 0.0029  | -0.0089 |
|     |    |    | Z | 0.0010  | -0.0002 | -0.0025 | -0.0022 | 0.0063  | -0.0024 |
| AT. | 3  | CA | X | 0.0004  | 0.0034  | 0.0046  | 0.0017  | 0.0024  | 0.0006  |
|     |    |    | Y | -0.0081 | -0.0023 | 0.0003  | -0.0009 | 0.0029  | 0.0089  |
|     |    |    | Z | -0.0010 | 0.0002  | 0.0025  | -0.0022 | -0.0063 | -0.0024 |
| AT. | 4  | CA | X | -0.0004 | 0.0034  | 0.0046  | -0.0017 | -0.0024 | 0.0006  |
|     |    |    | Y | -0.0081 | 0.0023  | -0.0003 | -0.0009 | 0.0029  | -0.0089 |
|     |    |    | Z | 0.0010  | 0.0002  | 0.0025  | 0.0022  | 0.0063  | -0.0024 |
| AT. | 5  | CA | X | -0.0023 | 0.0006  | 0.0072  | -0.0003 | 0.0006  | -0.0016 |
|     |    |    | Y | 0.0003  | 0.0048  | -0.0019 | 0.0009  | 0.0010  | 0.0005  |
|     |    |    | Z | 0.0015  | -0.0068 | -0.0003 | 0.0000  | 0.0016  | 0.0009  |
| AT. | 6  | CA | X | 0.0023  | 0.0006  | 0.0072  | 0.0003  | -0.0006 | -0.0016 |
|     |    |    | Y | 0.0003  | -0.0048 | 0.0019  | 0.0009  | 0.0010  | -0.0005 |
|     |    |    | Z | -0.0015 | -0.0068 | -0.0003 | -0.0000 | -0.0016 | 0.0009  |
| AT. | 7  | CA | X | -0.0023 | -0.0006 | -0.0072 | 0.0003  | 0.0006  | -0.0016 |
|     |    |    | Y | 0.0003  | -0.0048 | 0.0019  | -0.0009 | 0.0010  | 0.0005  |
|     |    |    | Z | 0.0015  | 0.0068  | 0.0003  | -0.0000 | 0.0016  | 0.0009  |
| AT. | 8  | CA | X | 0.0023  | -0.0006 | -0.0072 | -0.0003 | -0.0006 | -0.0016 |
|     |    |    | Y | 0.0003  | 0.0048  | -0.0019 | -0.0009 | 0.0010  | -0.0005 |
|     |    |    | Z | -0.0015 | 0.0068  | 0.0003  | 0.0000  | -0.0016 | 0.0009  |
| AT. | 9  | SI | X | 0.0043  | -0.0039 | -0.0190 | -0.0142 | 0.0044  | 0.0032  |
|     |    |    | Y | 0.0244  | 0.0009  | -0.0022 | -0.0052 | -0.0104 | -0.0228 |
|     |    |    | Z | -0.0051 | -0.0176 | 0.0036  | 0.0136  | -0.0138 | 0.0049  |
| AT. | 10 | SI | X | -0.0043 | -0.0039 | -0.0190 | 0.0142  | -0.0044 | 0.0032  |
|     |    |    | Y | 0.0244  | -0.0009 | 0.0022  | -0.0052 | -0.0104 | 0.0228  |
|     |    |    | Z | 0.0051  | -0.0176 | 0.0036  | -0.0136 | 0.0138  | 0.0049  |
| AT. | 11 | SI | X | 0.0043  | 0.0039  | 0.0190  | 0.0142  | 0.0044  | 0.0032  |
|     |    |    | Y | 0.0244  | -0.0009 | 0.0022  | 0.0052  | -0.0104 | -0.0228 |
|     |    |    | Z | -0.0051 | 0.0176  | -0.0036 | -0.0136 | -0.0138 | 0.0049  |
| AT. | 12 | SI | X | -0.0043 | 0.0039  | 0.0190  | -0.0142 | -0.0044 | 0.0032  |
|     |    |    | Y | 0.0244  | 0.0009  | -0.0022 | 0.0052  | -0.0104 | 0.0228  |
|     |    |    | Z | 0.0051  | 0.0176  | -0.0036 | 0.0136  | 0.0138  | 0.0049  |
| AT. | 13 | O  | X | -0.0051 | 0.0056  | 0.0269  | 0.0198  | -0.0025 | 0.0020  |
|     |    |    | Y | 0.0187  | -0.0057 | 0.0079  | 0.0059  | -0.0148 | -0.0199 |
|     |    |    | Z | 0.0137  | 0.0179  | -0.0051 | -0.0158 | 0.0237  | -0.0141 |
| AT. | 14 | O  | X | 0.0051  | 0.0056  | 0.0269  | -0.0198 | 0.0025  | 0.0020  |
|     |    |    | Y | 0.0187  | 0.0057  | -0.0079 | 0.0059  | -0.0148 | 0.0199  |
|     |    |    | Z | -0.0137 | 0.0179  | -0.0051 | 0.0158  | -0.0237 | -0.0141 |
| AT. | 15 | O  | X | -0.0051 | -0.0056 | -0.0269 | -0.0198 | -0.0025 | 0.0020  |
|     |    |    | Y | 0.0187  | 0.0057  | -0.0079 | -0.0059 | -0.0148 | -0.0199 |
|     |    |    | Z | 0.0137  | -0.0179 | 0.0051  | 0.0158  | 0.0237  | -0.0141 |
| AT. | 16 | O  | X | 0.0051  | -0.0056 | -0.0269 | 0.0198  | 0.0025  | 0.0020  |
|     |    |    | Y | 0.0187  | -0.0057 | 0.0079  | -0.0059 | -0.0148 | 0.0199  |
|     |    |    | Z | -0.0137 | -0.0179 | 0.0051  | -0.0158 | -0.0237 | -0.0141 |
| AT. | 17 | O  | X | 0.0129  | -0.0205 | -0.0091 | 0.0009  | -0.0199 | -0.0170 |
|     |    |    | Y | -0.0138 | -0.0100 | -0.0104 | -0.0017 | 0.0021  | 0.0178  |
|     |    |    | Z | 0.0169  | 0.0250  | -0.0175 | -0.0293 | 0.0227  | -0.0042 |
| AT. | 18 | O  | X | -0.0129 | -0.0205 | -0.0091 | -0.0009 | 0.0199  | -0.0170 |
|     |    |    | Y | -0.0138 | 0.0100  | 0.0104  | -0.0017 | 0.0021  | -0.0178 |
|     |    |    | Z | -0.0169 | 0.0250  | -0.0175 | 0.0293  | -0.0227 | -0.0042 |
| AT. | 19 | O  | X | 0.0129  | 0.0205  | 0.0091  | -0.0009 | -0.0199 | -0.0170 |
|     |    |    | Y | -0.0138 | 0.0100  | 0.0104  | 0.0017  | 0.0021  | 0.0178  |
|     |    |    | Z | 0.0169  | -0.0250 | 0.0175  | 0.0293  | 0.0227  | -0.0042 |
| AT. | 20 | O  | X | -0.0129 | 0.0205  | 0.0091  | 0.0009  | 0.0199  | -0.0170 |
|     |    |    | Y | -0.0138 | -0.0100 | -0.0104 | 0.0017  | 0.0021  | -0.0178 |
|     |    |    | Z | -0.0169 | -0.0250 | 0.0175  | -0.0293 | -0.0227 | -0.0042 |
| AT. | 21 | O  | X | 0.0012  | 0.0287  | -0.0060 | -0.0167 | 0.0258  | 0.0055  |
|     |    |    | Y | -0.0227 | 0.0007  | 0.0070  | 0.0076  | 0.0001  | 0.0269  |
|     |    |    | Z | -0.0010 | 0.0107  | 0.0220  | 0.0104  | 0.0017  | -0.0049 |
| AT. | 22 | O  | X | -0.0012 | 0.0287  | -0.0060 | 0.0167  | -0.0258 | 0.0055  |
|     |    |    | Y | -0.0227 | -0.0007 | -0.0070 | 0.0076  | 0.0001  | -0.0269 |
|     |    |    | Z | 0.0010  | 0.0107  | 0.0220  | -0.0104 | -0.0017 | -0.0049 |
| AT. | 23 | O  | X | 0.0012  | -0.0287 | 0.0060  | 0.0167  | 0.0258  | 0.0055  |
|     |    |    | Y | -0.0227 | -0.0007 | -0.0070 | -0.0076 | 0.0001  | 0.0269  |
|     |    |    | Z | -0.0010 | -0.0107 | -0.0220 | -0.0104 | 0.0017  | -0.0049 |
| AT. | 24 | O  | X | -0.0012 | -0.0287 | 0.0060  | -0.0167 | -0.0258 | 0.0055  |
|     |    |    | Y | -0.0227 | 0.0007  | 0.0070  | -0.0076 | 0.0001  | -0.0269 |
|     |    |    | Z | 0.0010  | -0.0107 | -0.0220 | 0.0104  | -0.0017 | -0.0049 |
| AT. | 25 | O  | X | -0.0187 | -0.0055 | 0.0287  | 0.0295  | -0.0077 | 0.0065  |
|     |    |    | Y | -0.0053 | 0.0157  | 0.0040  | -0.0007 | 0.0208  | 0.0051  |
|     |    |    | Z | -0.0190 | -0.0140 | -0.0079 | 0.0057  | -0.0058 | 0.0181  |
| AT. | 26 | O  | X | 0.0187  | -0.0055 | 0.0287  | -0.0295 | 0.0077  | 0.0065  |
|     |    |    | Y | -0.0053 | -0.0157 | -0.0040 | -0.0007 | 0.0208  | -0.0051 |
|     |    |    | Z | 0.0190  | -0.0140 | -0.0079 | -0.0057 | 0.0058  | 0.0181  |

|               |    |    |   |         |         |         |         |         |         |
|---------------|----|----|---|---------|---------|---------|---------|---------|---------|
| AT.           | 27 | O  | X | -0.0187 | 0.0055  | -0.0287 | -0.0295 | -0.0077 | 0.0065  |
|               |    |    | Y | -0.0053 | -0.0157 | -0.0040 | 0.0007  | 0.0208  | 0.0051  |
|               |    |    | Z | -0.0190 | 0.0140  | 0.0079  | -0.0057 | -0.0058 | 0.0181  |
| AT.           | 28 | O  | X | 0.0187  | 0.0055  | -0.0287 | 0.0295  | 0.0077  | 0.0065  |
|               |    |    | Y | -0.0053 | 0.0157  | 0.0040  | 0.0007  | 0.0208  | -0.0051 |
|               |    |    | Z | 0.0190  | 0.0140  | 0.0079  | 0.0057  | 0.0058  | 0.0181  |
| FREQ (CM**-1) |    |    |   | 533.58  | 544.83  | 819.78  | 822.18  | 823.25  | 832.53  |
| AT.           | 1  | CA | X | -0.0011 | 0.0017  | -0.0001 | 0.0000  | -0.0004 | -0.0004 |
|               |    |    | Y | -0.0103 | 0.0107  | -0.0007 | -0.0006 | -0.0012 | -0.0015 |
|               |    |    | Z | 0.0002  | 0.0015  | -0.0000 | -0.0010 | -0.0004 | 0.0011  |
| AT.           | 2  | CA | X | 0.0011  | 0.0017  | -0.0001 | -0.0000 | 0.0004  | -0.0004 |
|               |    |    | Y | -0.0103 | -0.0107 | 0.0007  | -0.0006 | -0.0012 | 0.0015  |
|               |    |    | Z | -0.0002 | 0.0015  | -0.0000 | 0.0010  | 0.0004  | 0.0011  |
| AT.           | 3  | CA | X | 0.0011  | -0.0017 | -0.0001 | 0.0000  | 0.0004  | 0.0004  |
|               |    |    | Y | 0.0103  | -0.0107 | -0.0007 | -0.0006 | 0.0012  | 0.0015  |
|               |    |    | Z | -0.0002 | -0.0015 | -0.0000 | -0.0010 | 0.0004  | -0.0011 |
| AT.           | 4  | CA | X | -0.0011 | -0.0017 | -0.0001 | -0.0000 | -0.0004 | 0.0004  |
|               |    |    | Y | 0.0103  | 0.0107  | 0.0007  | -0.0006 | 0.0012  | -0.0015 |
|               |    |    | Z | 0.0002  | -0.0015 | -0.0000 | 0.0010  | -0.0004 | -0.0011 |
| AT.           | 5  | CA | X | -0.0013 | -0.0008 | 0.0002  | -0.0001 | -0.0002 | 0.0004  |
|               |    |    | Y | 0.0010  | 0.0014  | 0.0011  | 0.0002  | -0.0003 | 0.0011  |
|               |    |    | Z | -0.0054 | 0.0010  | 0.0002  | 0.0008  | -0.0003 | 0.0019  |
| AT.           | 6  | CA | X | 0.0013  | -0.0008 | 0.0002  | 0.0001  | 0.0002  | 0.0004  |
|               |    |    | Y | 0.0010  | -0.0014 | -0.0011 | 0.0002  | -0.0003 | -0.0011 |
|               |    |    | Z | 0.0054  | 0.0010  | 0.0002  | -0.0008 | 0.0003  | 0.0019  |
| AT.           | 7  | CA | X | 0.0013  | 0.0008  | 0.0002  | -0.0001 | 0.0002  | -0.0004 |
|               |    |    | Y | -0.0010 | -0.0014 | 0.0011  | 0.0002  | 0.0003  | -0.0011 |
|               |    |    | Z | 0.0054  | -0.0010 | 0.0002  | 0.0008  | 0.0003  | -0.0019 |
| AT.           | 8  | CA | X | -0.0013 | 0.0008  | 0.0002  | 0.0001  | -0.0002 | -0.0004 |
|               |    |    | Y | -0.0010 | 0.0014  | -0.0011 | 0.0002  | 0.0003  | 0.0011  |
|               |    |    | Z | -0.0054 | -0.0010 | 0.0002  | -0.0008 | -0.0003 | -0.0019 |
| AT.           | 9  | SI | X | -0.0025 | 0.0029  | -0.0034 | -0.0004 | -0.0087 | -0.0049 |
|               |    |    | Y | 0.0205  | -0.0185 | 0.0075  | 0.0081  | 0.0044  | 0.0040  |
|               |    |    | Z | 0.0054  | -0.0015 | -0.0043 | -0.0016 | -0.0122 | -0.0063 |
| AT.           | 10 | SI | X | 0.0025  | 0.0029  | -0.0034 | 0.0004  | 0.0087  | -0.0049 |
|               |    |    | Y | 0.0205  | 0.0185  | -0.0075 | 0.0081  | 0.0044  | -0.0040 |
|               |    |    | Z | -0.0054 | -0.0015 | -0.0043 | 0.0016  | 0.0122  | -0.0063 |
| AT.           | 11 | SI | X | 0.0025  | -0.0029 | -0.0034 | -0.0004 | 0.0087  | 0.0049  |
|               |    |    | Y | -0.0205 | 0.0185  | 0.0075  | 0.0081  | -0.0044 | -0.0040 |
|               |    |    | Z | -0.0054 | 0.0015  | -0.0043 | -0.0016 | 0.0122  | 0.0063  |
| AT.           | 12 | SI | X | -0.0025 | -0.0029 | -0.0034 | 0.0004  | -0.0087 | 0.0049  |
|               |    |    | Y | -0.0205 | -0.0185 | -0.0075 | 0.0081  | -0.0044 | 0.0040  |
|               |    |    | Z | 0.0054  | 0.0015  | -0.0043 | 0.0016  | -0.0122 | 0.0063  |
| AT.           | 13 | O  | X | -0.0017 | 0.0039  | -0.0021 | -0.0022 | -0.0026 | -0.0029 |
|               |    |    | Y | 0.0248  | -0.0217 | 0.0146  | 0.0136  | 0.0153  | 0.0199  |
|               |    |    | Z | -0.0052 | -0.0046 | 0.0027  | 0.0028  | 0.0026  | 0.0024  |
| AT.           | 14 | O  | X | 0.0017  | 0.0039  | -0.0021 | 0.0022  | 0.0026  | -0.0029 |
|               |    |    | Y | 0.0248  | 0.0217  | -0.0146 | 0.0136  | 0.0153  | -0.0199 |
|               |    |    | Z | 0.0052  | -0.0046 | 0.0027  | -0.0028 | -0.0026 | 0.0024  |
| AT.           | 15 | O  | X | 0.0017  | -0.0039 | -0.0021 | -0.0022 | 0.0026  | 0.0029  |
|               |    |    | Y | -0.0248 | 0.0217  | 0.0146  | 0.0136  | -0.0153 | -0.0199 |
|               |    |    | Z | 0.0052  | 0.0046  | 0.0027  | 0.0028  | -0.0026 | -0.0024 |
| AT.           | 16 | O  | X | -0.0017 | -0.0039 | -0.0021 | 0.0022  | -0.0026 | 0.0029  |
|               |    |    | Y | -0.0248 | -0.0217 | -0.0146 | 0.0136  | -0.0153 | 0.0199  |
|               |    |    | Z | -0.0052 | 0.0046  | 0.0027  | -0.0028 | 0.0026  | -0.0024 |
| AT.           | 17 | O  | X | 0.0172  | -0.0175 | -0.0169 | -0.0224 | -0.0046 | -0.0125 |
|               |    |    | Y | -0.0143 | 0.0145  | -0.0090 | -0.0121 | -0.0023 | -0.0086 |
|               |    |    | Z | 0.0089  | -0.0102 | -0.0079 | -0.0083 | -0.0020 | -0.0048 |
| AT.           | 18 | O  | X | -0.0172 | -0.0175 | -0.0169 | 0.0224  | 0.0046  | -0.0125 |
|               |    |    | Y | -0.0143 | -0.0145 | 0.0090  | -0.0121 | -0.0023 | 0.0086  |
|               |    |    | Z | -0.0089 | -0.0102 | -0.0079 | 0.0083  | 0.0020  | -0.0048 |
| AT.           | 19 | O  | X | -0.0172 | 0.0175  | -0.0169 | -0.0224 | 0.0046  | 0.0125  |
|               |    |    | Y | 0.0143  | -0.0145 | -0.0090 | -0.0121 | 0.0023  | 0.0086  |
|               |    |    | Z | -0.0089 | 0.0102  | -0.0079 | -0.0083 | 0.0020  | 0.0048  |
| AT.           | 20 | O  | X | 0.0172  | 0.0175  | -0.0169 | 0.0224  | -0.0046 | 0.0125  |
|               |    |    | Y | 0.0143  | 0.0145  | 0.0090  | -0.0121 | 0.0023  | -0.0086 |
|               |    |    | Z | 0.0089  | 0.0102  | -0.0079 | 0.0083  | -0.0020 | 0.0048  |
| AT.           | 21 | O  | X | -0.0123 | 0.0046  | 0.0173  | 0.0179  | 0.0138  | 0.0157  |
|               |    |    | Y | -0.0172 | 0.0248  | -0.0033 | -0.0028 | -0.0037 | -0.0052 |
|               |    |    | Z | 0.0038  | -0.0082 | -0.0146 | -0.0140 | -0.0104 | -0.0131 |
| AT.           | 22 | O  | X | 0.0123  | 0.0046  | 0.0173  | -0.0179 | -0.0138 | 0.0157  |
|               |    |    | Y | -0.0172 | -0.0248 | 0.0033  | -0.0028 | -0.0037 | 0.0052  |
|               |    |    | Z | -0.0038 | -0.0082 | -0.0146 | 0.0140  | 0.0104  | -0.0131 |
| AT.           | 23 | O  | X | 0.0123  | -0.0046 | 0.0173  | 0.0179  | -0.0138 | -0.0157 |
|               |    |    | Y | 0.0172  | -0.0248 | -0.0033 | -0.0028 | 0.0037  | 0.0052  |
|               |    |    | Z | -0.0038 | 0.0082  | -0.0146 | -0.0140 | 0.0104  | 0.0131  |
| AT.           | 24 | O  | X | -0.0123 | -0.0046 | 0.0173  | -0.0179 | 0.0138  | -0.0157 |

|               |    |    |         |         |         |         |         |         |
|---------------|----|----|---------|---------|---------|---------|---------|---------|
|               |    | Y  | 0.0172  | 0.0248  | 0.0033  | -0.0028 | 0.0037  | -0.0052 |
|               |    | Z  | 0.0038  | 0.0082  | -0.0146 | 0.0140  | -0.0104 | 0.0131  |
| AT.           | 25 | O  | X       | 0.0005  | 0.0037  | 0.0073  | 0.0076  | 0.0082  |
|               |    | Y  | -0.0181 | 0.0134  | -0.0138 | -0.0119 | -0.0166 | -0.0150 |
|               |    | Z  | -0.0192 | 0.0226  | 0.0268  | 0.0229  | 0.0303  | 0.0265  |
| AT.           | 26 | O  | X       | -0.0005 | 0.0037  | 0.0073  | -0.0076 | -0.0082 |
|               |    | Y  | -0.0181 | -0.0134 | 0.0138  | -0.0119 | -0.0166 | 0.0150  |
|               |    | Z  | 0.0192  | 0.0226  | 0.0268  | -0.0229 | -0.0303 | 0.0265  |
| AT.           | 27 | O  | X       | -0.0005 | -0.0037 | 0.0073  | 0.0076  | -0.0082 |
|               |    | Y  | 0.0181  | -0.0134 | -0.0138 | -0.0119 | 0.0166  | 0.0150  |
|               |    | Z  | 0.0192  | -0.0226 | 0.0268  | 0.0229  | -0.0303 | -0.0265 |
| AT.           | 28 | O  | X       | 0.0005  | -0.0037 | 0.0073  | -0.0076 | 0.0082  |
|               |    | Y  | 0.0181  | 0.0134  | 0.0138  | -0.0119 | 0.0166  | -0.0150 |
|               |    | Z  | -0.0192 | -0.0226 | 0.0268  | -0.0229 | 0.0303  | -0.0265 |
| FREQ (CM**-1) |    |    | 834.32  | 842.59  | 852.70  | 859.88  | 879.25  | 880.69  |
| AT.           | 1  | CA | X       | 0.0009  | -0.0001 | 0.0015  | -0.0006 | -0.0004 |
|               |    | Y  | -0.0010 | -0.0001 | -0.0008 | -0.0001 | 0.0006  | 0.0002  |
|               |    | Z  | 0.0003  | 0.0006  | 0.0001  | 0.0008  | 0.0004  | -0.0001 |
| AT.           | 2  | CA | X       | -0.0009 | -0.0001 | 0.0015  | 0.0006  | 0.0004  |
|               |    | Y  | -0.0010 | 0.0001  | 0.0008  | -0.0001 | 0.0006  | -0.0002 |
|               |    | Z  | -0.0003 | 0.0006  | 0.0001  | -0.0008 | -0.0004 | -0.0001 |
| AT.           | 3  | CA | X       | -0.0009 | -0.0001 | -0.0015 | -0.0006 | 0.0004  |
|               |    | Y  | 0.0010  | -0.0001 | 0.0008  | -0.0001 | -0.0006 | 0.0002  |
|               |    | Z  | -0.0003 | 0.0006  | -0.0001 | 0.0008  | -0.0004 | -0.0001 |
| AT.           | 4  | CA | X       | 0.0009  | -0.0001 | -0.0015 | 0.0006  | -0.0004 |
|               |    | Y  | 0.0010  | 0.0001  | -0.0008 | -0.0001 | -0.0006 | -0.0002 |
|               |    | Z  | 0.0003  | 0.0006  | -0.0001 | -0.0008 | 0.0004  | -0.0001 |
| AT.           | 5  | CA | X       | 0.0003  | -0.0000 | -0.0011 | 0.0002  | -0.0002 |
|               |    | Y  | 0.0007  | 0.0002  | -0.0010 | 0.0003  | 0.0002  | 0.0003  |
|               |    | Z  | -0.0003 | -0.0010 | 0.0011  | -0.0003 | -0.0001 | -0.0004 |
| AT.           | 6  | CA | X       | -0.0003 | -0.0000 | -0.0011 | -0.0002 | 0.0002  |
|               |    | Y  | 0.0007  | -0.0002 | 0.0010  | 0.0003  | 0.0002  | -0.0003 |
|               |    | Z  | 0.0003  | -0.0010 | 0.0011  | 0.0003  | 0.0001  | -0.0004 |
| AT.           | 7  | CA | X       | -0.0003 | -0.0000 | 0.0011  | 0.0002  | 0.0002  |
|               |    | Y  | -0.0007 | 0.0002  | 0.0010  | 0.0003  | -0.0002 | 0.0003  |
|               |    | Z  | 0.0003  | -0.0010 | -0.0011 | -0.0003 | 0.0001  | -0.0004 |
| AT.           | 8  | CA | X       | 0.0003  | -0.0000 | 0.0011  | -0.0002 | -0.0002 |
|               |    | Y  | -0.0007 | -0.0002 | -0.0010 | 0.0003  | -0.0002 | -0.0003 |
|               |    | Z  | -0.0003 | -0.0010 | -0.0011 | 0.0003  | -0.0001 | -0.0004 |
| AT.           | 9  | SI | X       | 0.0123  | 0.0139  | 0.0168  | 0.0228  | -0.0176 |
|               |    | Y  | 0.0031  | 0.0016  | 0.0013  | 0.0024  | -0.0049 | -0.0068 |
|               |    | Z  | 0.0140  | 0.0174  | 0.0147  | 0.0035  | 0.0147  | 0.0143  |
| AT.           | 10 | SI | X       | -0.0123 | 0.0139  | 0.0168  | -0.0228 | 0.0176  |
|               |    | Y  | 0.0031  | -0.0016 | -0.0013 | 0.0024  | -0.0049 | 0.0068  |
|               |    | Z  | -0.0140 | 0.0174  | 0.0147  | -0.0035 | -0.0147 | 0.0143  |
| AT.           | 11 | SI | X       | -0.0123 | 0.0139  | -0.0168 | 0.0228  | 0.0176  |
|               |    | Y  | -0.0031 | 0.0016  | -0.0013 | 0.0024  | 0.0049  | -0.0068 |
|               |    | Z  | -0.0140 | 0.0174  | -0.0147 | 0.0035  | -0.0147 | 0.0143  |
| AT.           | 12 | SI | X       | 0.0123  | 0.0139  | -0.0168 | -0.0228 | -0.0176 |
|               |    | Y  | -0.0031 | -0.0016 | 0.0013  | 0.0024  | 0.0049  | 0.0068  |
|               |    | Z  | 0.0140  | 0.0174  | -0.0147 | -0.0035 | 0.0147  | 0.0143  |
| AT.           | 13 | O  | X       | -0.0025 | -0.0002 | -0.0024 | 0.0004  | -0.0002 |
|               |    | Y  | 0.0108  | 0.0026  | 0.0067  | -0.0005 | 0.0016  | 0.0051  |
|               |    | Z  | 0.0007  | 0.0007  | 0.0001  | -0.0013 | -0.0004 | 0.0009  |
| AT.           | 14 | O  | X       | 0.0025  | -0.0002 | -0.0024 | -0.0004 | 0.0002  |
|               |    | Y  | 0.0108  | -0.0026 | -0.0067 | -0.0005 | 0.0016  | -0.0051 |
|               |    | Z  | -0.0007 | 0.0007  | 0.0001  | 0.0013  | 0.0004  | 0.0009  |
| AT.           | 15 | O  | X       | 0.0025  | -0.0002 | 0.0024  | 0.0004  | 0.0002  |
|               |    | Y  | -0.0108 | 0.0026  | -0.0067 | -0.0005 | -0.0016 | 0.0051  |
|               |    | Z  | -0.0007 | 0.0007  | -0.0001 | -0.0013 | 0.0004  | 0.0009  |
| AT.           | 16 | O  | X       | -0.0025 | -0.0002 | 0.0024  | -0.0004 | -0.0002 |
|               |    | Y  | -0.0108 | -0.0026 | 0.0067  | -0.0005 | -0.0016 | -0.0051 |
|               |    | Z  | 0.0007  | 0.0007  | -0.0001 | 0.0013  | -0.0004 | 0.0009  |
| AT.           | 17 | O  | X       | -0.0294 | -0.0249 | -0.0261 | -0.0225 | 0.0103  |
|               |    | Y  | -0.0162 | -0.0144 | -0.0142 | -0.0116 | 0.0058  | 0.0057  |
|               |    | Z  | -0.0123 | -0.0105 | -0.0128 | -0.0106 | 0.0037  | 0.0049  |
| AT.           | 18 | O  | X       | 0.0294  | -0.0249 | -0.0261 | 0.0225  | -0.0103 |
|               |    | Y  | -0.0162 | 0.0144  | 0.0142  | -0.0116 | 0.0058  | -0.0057 |
|               |    | Z  | 0.0123  | -0.0105 | -0.0128 | 0.0106  | -0.0037 | 0.0049  |
| AT.           | 19 | O  | X       | 0.0294  | -0.0249 | 0.0261  | -0.0225 | -0.0103 |
|               |    | Y  | 0.0162  | -0.0144 | 0.0142  | -0.0116 | -0.0058 | 0.0057  |
|               |    | Z  | 0.0123  | -0.0105 | 0.0128  | -0.0106 | -0.0037 | 0.0049  |
| AT.           | 20 | O  | X       | -0.0294 | -0.0249 | 0.0261  | 0.0225  | 0.0103  |
|               |    | Y  | 0.0162  | 0.0144  | -0.0142 | -0.0116 | -0.0058 | -0.0057 |
|               |    | Z  | -0.0123 | -0.0105 | 0.0128  | 0.0106  | 0.0037  | 0.0049  |
| AT.           | 21 | O  | X       | 0.0105  | 0.0039  | 0.0023  | -0.0145 | 0.0224  |
|               |    | Y  | -0.0016 | -0.0027 | -0.0011 | 0.0029  | -0.0039 | -0.0041 |

|               |    |    |         |         |         |         |         |         |         |
|---------------|----|----|---------|---------|---------|---------|---------|---------|---------|
|               |    | Z  | -0.0092 | -0.0028 | -0.0031 | 0.0124  | -0.0195 | -0.0188 |         |
| AT.           | 22 | O  | X       | -0.0105 | 0.0039  | 0.0023  | 0.0145  | -0.0224 | 0.0214  |
|               |    | Y  | -0.0016 | 0.0027  | 0.0011  | 0.0029  | -0.0039 | 0.0041  |         |
|               |    | Z  | 0.0092  | -0.0028 | -0.0031 | -0.0124 | 0.0195  | -0.0188 |         |
| AT.           | 23 | O  | X       | -0.0105 | 0.0039  | -0.0023 | -0.0145 | -0.0224 | 0.0214  |
|               |    | Y  | 0.0016  | -0.0027 | 0.0011  | 0.0029  | 0.0039  | -0.0041 |         |
|               |    | Z  | 0.0092  | -0.0028 | 0.0031  | 0.0124  | 0.0195  | -0.0188 |         |
| AT.           | 24 | O  | X       | 0.0105  | 0.0039  | -0.0023 | 0.0145  | 0.0224  | 0.0214  |
|               |    | Y  | 0.0016  | 0.0027  | -0.0011 | 0.0029  | 0.0039  | 0.0041  |         |
|               |    | Z  | -0.0092 | -0.0028 | 0.0031  | -0.0124 | -0.0195 | -0.0188 |         |
| AT.           | 25 | O  | X       | -0.0018 | -0.0029 | -0.0043 | -0.0020 | -0.0025 | -0.0030 |
|               |    | Y  | 0.0020  | 0.0097  | 0.0052  | 0.0046  | 0.0053  | 0.0051  |         |
|               |    | Z  | -0.0036 | -0.0166 | -0.0124 | -0.0096 | -0.0096 | -0.0107 |         |
| AT.           | 26 | O  | X       | 0.0018  | -0.0029 | -0.0043 | 0.0020  | 0.0025  | -0.0030 |
|               |    | Y  | 0.0020  | -0.0097 | -0.0052 | 0.0046  | 0.0053  | -0.0051 |         |
|               |    | Z  | 0.0036  | -0.0166 | -0.0124 | 0.0096  | 0.0096  | -0.0107 |         |
| AT.           | 27 | O  | X       | 0.0018  | -0.0029 | 0.0043  | -0.0020 | 0.0025  | -0.0030 |
|               |    | Y  | -0.0020 | 0.0097  | -0.0052 | 0.0046  | -0.0053 | 0.0051  |         |
|               |    | Z  | 0.0036  | -0.0166 | 0.0124  | -0.0096 | 0.0096  | -0.0107 |         |
| AT.           | 28 | O  | X       | -0.0018 | -0.0029 | 0.0043  | 0.0020  | -0.0025 | -0.0030 |
|               |    | Y  | -0.0020 | -0.0097 | 0.0052  | 0.0046  | -0.0053 | -0.0051 |         |
|               |    | Z  | -0.0036 | -0.0166 | 0.0124  | 0.0096  | -0.0096 | -0.0107 |         |
| FREQ (CM**-1) |    |    | 898.52  | 933.16  | 963.14  | 963.29  | 980.43  | 980.45  |         |
| AT.           | 1  | CA | X       | -0.0007 | 0.0000  | -0.0002 | 0.0001  | 0.0000  | -0.0003 |
|               |    | Y  | 0.0006  | 0.0003  | 0.0000  | 0.0005  | -0.0005 | -0.0008 |         |
|               |    | Z  | -0.0001 | 0.0022  | -0.0009 | 0.0002  | 0.0001  | -0.0002 |         |
| AT.           | 2  | CA | X       | -0.0007 | -0.0000 | 0.0002  | -0.0001 | 0.0000  | -0.0003 |
|               |    | Y  | -0.0006 | 0.0003  | 0.0000  | 0.0005  | 0.0005  | 0.0008  |         |
|               |    | Z  | -0.0001 | -0.0022 | 0.0009  | -0.0002 | 0.0001  | -0.0002 |         |
| AT.           | 3  | CA | X       | 0.0007  | 0.0000  | -0.0002 | -0.0001 | 0.0000  | 0.0003  |
|               |    | Y  | -0.0006 | 0.0003  | 0.0000  | -0.0005 | -0.0005 | 0.0008  |         |
|               |    | Z  | 0.0001  | 0.0022  | -0.0009 | -0.0002 | 0.0001  | 0.0002  |         |
| AT.           | 4  | CA | X       | 0.0007  | -0.0000 | 0.0002  | 0.0001  | 0.0000  | 0.0003  |
|               |    | Y  | 0.0006  | 0.0003  | 0.0000  | -0.0005 | 0.0005  | -0.0008 |         |
|               |    | Z  | 0.0001  | -0.0022 | 0.0009  | 0.0002  | 0.0001  | 0.0002  |         |
| AT.           | 5  | CA | X       | 0.0004  | 0.0000  | 0.0003  | 0.0002  | 0.0004  | 0.0005  |
|               |    | Y  | -0.0009 | -0.0002 | -0.0002 | 0.0000  | -0.0014 | -0.0004 |         |
|               |    | Z  | 0.0013  | -0.0005 | 0.0000  | 0.0011  | -0.0003 | 0.0012  |         |
| AT.           | 6  | CA | X       | 0.0004  | -0.0000 | -0.0003 | -0.0002 | 0.0004  | 0.0005  |
|               |    | Y  | 0.0009  | -0.0002 | -0.0002 | 0.0000  | 0.0014  | 0.0004  |         |
|               |    | Z  | 0.0013  | 0.0005  | -0.0000 | -0.0011 | -0.0003 | 0.0012  |         |
| AT.           | 7  | CA | X       | -0.0004 | 0.0000  | 0.0003  | -0.0002 | 0.0004  | -0.0005 |
|               |    | Y  | 0.0009  | -0.0002 | -0.0002 | -0.0000 | -0.0014 | 0.0004  |         |
|               |    | Z  | -0.0013 | -0.0005 | 0.0000  | -0.0011 | -0.0003 | -0.0012 |         |
| AT.           | 8  | CA | X       | -0.0004 | -0.0000 | -0.0003 | 0.0002  | 0.0004  | -0.0005 |
|               |    | Y  | -0.0009 | -0.0002 | -0.0002 | -0.0000 | 0.0014  | -0.0004 |         |
|               |    | Z  | -0.0013 | 0.0005  | -0.0000 | 0.0011  | -0.0003 | -0.0012 |         |
| AT.           | 9  | SI | X       | -0.0143 | -0.0031 | 0.0044  | 0.0041  | -0.0057 | -0.0060 |
|               |    | Y  | -0.0091 | -0.0070 | -0.0191 | -0.0216 | 0.0196  | 0.0205  |         |
|               |    | Z  | 0.0159  | 0.0209  | -0.0068 | -0.0031 | 0.0040  | 0.0063  |         |
| AT.           | 10 | SI | X       | -0.0143 | 0.0031  | -0.0044 | -0.0041 | -0.0057 | -0.0060 |
|               |    | Y  | 0.0091  | -0.0070 | -0.0191 | -0.0216 | -0.0196 | -0.0205 |         |
|               |    | Z  | 0.0159  | -0.0209 | 0.0068  | 0.0031  | 0.0040  | 0.0063  |         |
| AT.           | 11 | SI | X       | 0.0143  | -0.0031 | 0.0044  | -0.0041 | -0.0057 | 0.0060  |
|               |    | Y  | 0.0091  | -0.0070 | -0.0191 | 0.0216  | 0.0196  | -0.0205 |         |
|               |    | Z  | -0.0159 | 0.0209  | -0.0068 | 0.0031  | 0.0040  | -0.0063 |         |
| AT.           | 12 | SI | X       | 0.0143  | 0.0031  | -0.0044 | 0.0041  | -0.0057 | 0.0060  |
|               |    | Y  | -0.0091 | -0.0070 | -0.0191 | 0.0216  | -0.0196 | 0.0205  |         |
|               |    | Z  | -0.0159 | -0.0209 | 0.0068  | -0.0031 | 0.0040  | -0.0063 |         |
| AT.           | 13 | O  | X       | -0.0008 | -0.0016 | -0.0049 | -0.0060 | 0.0050  | 0.0059  |
|               |    | Y  | 0.0065  | 0.0087  | 0.0327  | 0.0306  | -0.0327 | -0.0284 |         |
|               |    | Z  | 0.0011  | -0.0035 | 0.0055  | 0.0049  | -0.0037 | -0.0045 |         |
| AT.           | 14 | O  | X       | -0.0008 | 0.0016  | 0.0049  | 0.0060  | 0.0050  | 0.0059  |
|               |    | Y  | -0.0065 | 0.0087  | 0.0327  | 0.0306  | 0.0327  | 0.0284  |         |
|               |    | Z  | 0.0011  | 0.0035  | -0.0055 | -0.0049 | -0.0037 | -0.0045 |         |
| AT.           | 15 | O  | X       | 0.0008  | -0.0016 | -0.0049 | 0.0060  | 0.0050  | -0.0059 |
|               |    | Y  | -0.0065 | 0.0087  | 0.0327  | -0.0306 | -0.0327 | 0.0284  |         |
|               |    | Z  | -0.0011 | -0.0035 | 0.0055  | -0.0049 | -0.0037 | 0.0045  |         |
| AT.           | 16 | O  | X       | 0.0008  | 0.0016  | 0.0049  | -0.0060 | 0.0050  | -0.0059 |
|               |    | Y  | 0.0065  | 0.0087  | 0.0327  | -0.0306 | 0.0327  | -0.0284 |         |
|               |    | Z  | -0.0011 | 0.0035  | -0.0055 | 0.0049  | -0.0037 | 0.0045  |         |
| AT.           | 17 | O  | X       | 0.0081  | -0.0043 | 0.0042  | 0.0039  | -0.0018 | -0.0035 |
|               |    | Y  | 0.0065  | -0.0023 | 0.0013  | 0.0031  | 0.0001  | -0.0036 |         |
|               |    | Z  | 0.0010  | -0.0058 | 0.0017  | 0.0022  | -0.0007 | -0.0033 |         |
| AT.           | 18 | O  | X       | 0.0081  | 0.0043  | -0.0042 | -0.0039 | -0.0018 | -0.0035 |
|               |    | Y  | -0.0065 | -0.0023 | 0.0013  | 0.0031  | -0.0001 | 0.0036  |         |
|               |    | Z  | 0.0010  | 0.0058  | -0.0017 | -0.0022 | -0.0007 | -0.0033 |         |

|     |    |   |   |         |         |         |         |         |         |
|-----|----|---|---|---------|---------|---------|---------|---------|---------|
| AT. | 19 | O | X | -0.0081 | -0.0043 | 0.0042  | -0.0039 | -0.0018 | 0.0035  |
|     |    |   | Y | -0.0065 | -0.0023 | 0.0013  | -0.0031 | 0.0001  | 0.0036  |
|     |    |   | Z | -0.0010 | -0.0058 | 0.0017  | -0.0022 | -0.0007 | 0.0033  |
| AT. | 20 | O | X | -0.0081 | 0.0043  | -0.0042 | 0.0039  | -0.0018 | 0.0035  |
|     |    |   | Y | 0.0065  | -0.0023 | 0.0013  | -0.0031 | -0.0001 | -0.0036 |
|     |    |   | Z | -0.0010 | 0.0058  | -0.0017 | 0.0022  | -0.0007 | 0.0033  |
| AT. | 21 | O | X | 0.0200  | 0.0152  | -0.0060 | -0.0042 | 0.0045  | 0.0068  |
|     |    |   | Y | -0.0021 | -0.0030 | 0.0007  | 0.0013  | -0.0016 | -0.0037 |
|     |    |   | Z | -0.0195 | -0.0148 | 0.0032  | 0.0032  | -0.0041 | -0.0082 |
| AT. | 22 | O | X | 0.0200  | -0.0152 | 0.0060  | 0.0042  | 0.0045  | 0.0068  |
|     |    |   | Y | 0.0021  | -0.0030 | 0.0007  | 0.0013  | 0.0016  | 0.0037  |
|     |    |   | Z | -0.0195 | 0.0148  | -0.0032 | -0.0032 | -0.0041 | -0.0082 |
| AT. | 23 | O | X | -0.0200 | 0.0152  | -0.0060 | 0.0042  | 0.0045  | -0.0068 |
|     |    |   | Y | 0.0021  | -0.0030 | 0.0007  | -0.0013 | -0.0016 | 0.0037  |
|     |    |   | Z | 0.0195  | -0.0148 | 0.0032  | -0.0032 | -0.0041 | 0.0082  |
| AT. | 24 | O | X | -0.0200 | -0.0152 | 0.0060  | -0.0042 | 0.0045  | -0.0068 |
|     |    |   | Y | -0.0021 | -0.0030 | 0.0007  | -0.0013 | 0.0016  | -0.0037 |
|     |    |   | Z | 0.0195  | 0.0148  | -0.0032 | 0.0032  | -0.0041 | 0.0082  |
| AT. | 25 | O | X | -0.0019 | -0.0034 | -0.0007 | -0.0009 | 0.0011  | 0.0010  |
|     |    |   | Y | 0.0072  | 0.0086  | -0.0010 | 0.0036  | -0.0002 | -0.0034 |
|     |    |   | Z | -0.0120 | -0.0211 | 0.0023  | -0.0047 | 0.0020  | 0.0028  |
| AT. | 26 | O | X | -0.0019 | 0.0034  | 0.0007  | 0.0009  | 0.0011  | 0.0010  |
|     |    |   | Y | -0.0072 | 0.0086  | -0.0010 | 0.0036  | 0.0002  | 0.0034  |
|     |    |   | Z | -0.0120 | 0.0211  | -0.0023 | 0.0047  | 0.0020  | 0.0028  |
| AT. | 27 | O | X | 0.0019  | -0.0034 | -0.0007 | 0.0009  | 0.0011  | -0.0010 |
|     |    |   | Y | -0.0072 | 0.0086  | -0.0010 | -0.0036 | -0.0002 | 0.0034  |
|     |    |   | Z | 0.0120  | -0.0211 | 0.0023  | 0.0047  | 0.0020  | -0.0028 |
| AT. | 28 | O | X | 0.0019  | 0.0034  | 0.0007  | -0.0009 | 0.0011  | -0.0010 |
|     |    |   | Y | 0.0072  | 0.0086  | -0.0010 | -0.0036 | 0.0002  | -0.0034 |
|     |    |   | Z | 0.0120  | 0.0211  | -0.0023 | -0.0047 | 0.0020  | -0.0028 |

\*\*\*\*\*

#### VIBRATIONAL TEMPERATURES (K) [MODE NUMBER;IRREP]

##### TO MODES

|                  |                  |                  |                  |
|------------------|------------------|------------------|------------------|
| 146.1 [ 4;AU ]   | 152.3 [ 5;BU ]   | 153.9 [ 6;BG ]   | 161.7 [ 7;AG ]   |
| 177.3 [ 8;AU ]   | 202.2 [ 9;AG ]   | 206.4 [ 10;AU ]  | 212.9 [ 11;BU ]  |
| 220.0 [ 12;AG ]  | 220.7 [ 13;BG ]  | 230.4 [ 14;BG ]  | 237.2 [ 15;AG ]  |
| 248.0 [ 16;BG ]  | 248.4 [ 17;BU ]  | 253.0 [ 18;AG ]  | 258.1 [ 19;AU ]  |
| 267.4 [ 20;AU ]  | 284.2 [ 21;AG ]  | 285.4 [ 22;BG ]  | 286.8 [ 23;BU ]  |
| 292.9 [ 24;AG ]  | 307.3 [ 25;BU ]  | 312.8 [ 26;BG ]  | 314.8 [ 27;AU ]  |
| 324.9 [ 28;AU ]  | 331.1 [ 29;BU ]  | 345.6 [ 30;AG ]  | 356.8 [ 31;BG ]  |
| 361.8 [ 32;AG ]  | 363.1 [ 33;BU ]  | 369.1 [ 34;BG ]  | 370.3 [ 35;AU ]  |
| 380.7 [ 36;BU ]  | 382.5 [ 37;AG ]  | 390.8 [ 38;AU ]  | 393.7 [ 39;BG ]  |
| 395.4 [ 40;AU ]  | 400.5 [ 41;AG ]  | 411.6 [ 42;BG ]  | 411.6 [ 43;BU ]  |
| 422.0 [ 44;BG ]  | 428.0 [ 45;AU ]  | 436.1 [ 46;AG ]  | 448.8 [ 47;BG ]  |
| 451.7 [ 48;BU ]  | 511.6 [ 49;AG ]  | 519.6 [ 50;BU ]  | 532.9 [ 51;AU ]  |
| 547.1 [ 52;AU ]  | 577.1 [ 53;BG ]  | 588.6 [ 54;AG ]  | 593.1 [ 55;BG ]  |
| 612.6 [ 56;BU ]  | 684.5 [ 57;BU ]  | 689.0 [ 58;AU ]  | 707.7 [ 59;AG ]  |
| 713.9 [ 60;BU ]  | 717.7 [ 61;AU ]  | 727.0 [ 62;BG ]  | 740.8 [ 63;BG ]  |
| 744.9 [ 64;AG ]  | 751.8 [ 65;AU ]  | 753.0 [ 66;BU ]  | 767.7 [ 67;AG ]  |
| 783.9 [ 68;BG ]  | 1179.5 [ 69;BU ] | 1182.9 [ 70;AU ] | 1184.5 [ 71;AG ] |
| 1197.8 [ 72;BG ] | 1200.4 [ 73;AG ] | 1212.3 [ 74;BU ] | 1226.8 [ 75;BG ] |
| 1237.2 [ 76;AU ] | 1265.0 [ 77;AG ] | 1267.1 [ 78;BU ] | 1292.8 [ 79;BG ] |
| 1342.6 [ 80;AU ] | 1385.7 [ 81;AU ] | 1386.0 [ 82;AG ] | 1410.6 [ 83;BU ] |
| 1410.7 [ 84;BG ] |                  |                  |                  |

\*\*\*\*\*

#### HARMONIC VIBRATIONAL CONTRIBUTIONS TO THERMODYNAMIC FUNCTIONS AT GIVEN TEMPERATURE AND PRESSURE:

(EL = ELECTRONIC ENERGY  
 E0 = ZERO-POINT ENERGY  
 ET = THERMAL CONTRIBUTION TO THE VIBRATIONAL ENERGY  
 PV = PRESSURE \* VOLUME  
 TS = TEMPERATURE \* ENTROPY)

|    | AU/CELL              | EV/CELL              | KJ/MOL             |
|----|----------------------|----------------------|--------------------|
| EL | : -7757.783385138424 | -211100.018027151498 | -20368057.40730108 |
| E0 | : 0.075216382264     | 2.046741815747       | 197.48058380       |

\*\*\*\*\*

#### THERMODYNAMIC FUNCTIONS WITH VIBRATIONAL CONTRIBUTIONS

AT (T = 298.15 K, P = 0.10132500E+00 MPA):



OTHER THERMODYNAMIC FUNCTIONS:

\*\*\*\*\*

```
total 1502700
-rw-rw-r-- 1 vlasta vlasta          0 ožu  9 10:48 dffit3.dat
-rw-rw-r-- 1 vlasta vlasta      2156 ožu  9 15:34 ERROR
-rw-rw-r-- 1 vlasta vlasta      2156 ožu  9 15:34 ERROR.pe1
-rw-rw-r-- 1 vlasta vlasta      2156 ožu  9 15:34 ERROR.pe2
-rw-rw-r-- 1 vlasta vlasta      2156 ožu  9 15:34 ERROR.pe3
-rw-rw-r-- 1 vlasta vlasta      2156 ožu  9 15:34 ERROR.pe4
-rw-rw-r-- 1 vlasta vlasta      2156 ožu  9 15:34 ERROR.pe5
-rw-rw-r-- 1 vlasta vlasta      2156 ožu  9 15:34 ERROR.pe6
-rw-rw-r-- 1 vlasta vlasta      2156 ožu  9 15:34 ERROR.pe7
-rw-rw-r-- 1 vlasta vlasta      1414 ožu  9 15:35 fort.10.pe0
-rw-rw-r-- 1 vlasta vlasta 101154928 ožu  9 15:31 fort.10.pe1
-rw-rw-r-- 1 vlasta vlasta 101154928 ožu  9 15:31 fort.10.pe2
-rw-rw-r-- 1 vlasta vlasta  93929584 ožu  9 15:31 fort.10.pe3
-rw-rw-r-- 1 vlasta vlasta  93929584 ožu  9 15:31 fort.10.pe4
-rw-rw-r-- 1 vlasta vlasta 101154928 ožu  9 15:31 fort.10.pe5
-rw-rw-r-- 1 vlasta vlasta 101154928 ožu  9 15:31 fort.10.pe6
-rw-rw-r-- 1 vlasta vlasta  93929584 ožu  9 15:31 fort.10.pe7
-rw-rw-r-- 1 vlasta vlasta  1574184 ožu  9 15:31 fort.11.pe0
-rw-rw-r-- 1 vlasta vlasta  1574184 ožu  9 15:31 fort.11.pe1
-rw-rw-r-- 1 vlasta vlasta  1574184 ožu  9 15:31 fort.11.pe2
-rw-rw-r-- 1 vlasta vlasta  1574184 ožu  9 15:31 fort.11.pe3
-rw-rw-r-- 1 vlasta vlasta  1574184 ožu  9 15:31 fort.11.pe4
-rw-rw-r-- 1 vlasta vlasta  1574184 ožu  9 15:31 fort.11.pe5
-rw-rw-r-- 1 vlasta vlasta  1574184 ožu  9 15:31 fort.11.pe6
-rw-rw-r-- 1 vlasta vlasta  1574184 ožu  9 15:31 fort.11.pe7
-rw-rw-r-- 1 vlasta vlasta   51524 ožu  9 15:21 fort.12
-rw-rw-r-- 1 vlasta vlasta  3119304 ožu  9 10:57 fort.13
```

[illegible]

```
-rwxr-xr-x 1 vlasta vlasta 11332453 ožu 9 10:48 Pcrystal
-rw-rw-r-- 1 vlasta vlasta 398603 ožu 9 15:35 SCFOUT.LOG
-----
:= Removing scratch directories on: ...
:= finished sub, 9.03.2019. 15:35:26 CET
:= Elapsed time: 4h:47m:12s
```

---

OUTPUT OF CRYSTAL09 PROGRAM FOR Ca3SiO5 alite

```
=====
:= date: pet, 11.10.2019. 14:14:25 CEST
:= hostname: lmfz640
:= system: Linux lmfz640 5.0.0-31-generic #33~18.04.1-Ubuntu SMP Tue Oct 1 10:20:39 UTC 2019 x86_64 x86_64
x86_64 GNU/Linux
:= user: vlasta
:= scratch directory: /home/vlasta/crystal/tmp/tmp2648
:= Available predefined $Pcrystal_ENV={isis,neolith,kalkyl,lenngren,interactive,localhost}
:= $Pcrystal_ENV not defined by user. Trying to guess...
:= None of the predefined parallel enviroments matched. Configuring "localhost"...
:= Using predefined environment: localhost
:= mpirun to use: /usr/bin/mpirun.mpic
:= Got NSLOTS=8
:= =====
Ca3SiO5 Cm 81100 ICSD W G Mummie LDA i VWN PP
CRYSTAL
0 0 0
8
12.235 7.073 9.298 116.31
27
20 2.785434612087E-01 1.246419190595E-17 3.006880006403E-01
20 1.531537006405E-02 2.585068888852E-01 3.338407517012E-01
20 1.531537006405E-02 -2.585068888852E-01 3.338407517012E-01
20 -2.413293694602E-01 -2.359161832691E-01 -2.038417046735E-02
20 -2.413293694602E-01 2.359161832691E-01 -2.038417046735E-02
20 -3.032353025404E-01 -1.112570498310E-17 -3.537485816856E-01
20 2.760504695417E-02 5.000000000000E-01 2.002234093501E-02
20 -1.864937213094E-02 -2.762003324293E-01 -3.065722468464E-01
20 -1.864937213094E-02 2.762003324293E-01 -3.065722468464E-01
14 -2.804944480822E-01 -5.000000000000E-01 -3.483602425146E-01
14 2.866911555732E-01 5.000000000000E-01 3.584634624474E-01
14 1.563117691256E-03 7.236497377012E-19 1.317167878642E-03
8 1.799435653619E-01 -4.321182612850E-18 4.596840795229E-01
8 3.146382415874E-01 3.135397453095E-01 2.746504196733E-01
8 3.146382415874E-01 -3.135397453095E-01 2.746504196733E-01
8 1.416369842747E-01 5.000000000000E-01 3.242115389560E-01
8 -1.202960000615E-01 5.000000000000E-01 1.158423931343E-01
8 -1.323967604115E-01 3.626286874279E-18 -4.442461060711E-01
8 -1.316127431580E-01 -5.000000000000E-01 -2.417309932451E-01
8 -3.379350013612E-01 -3.099994556439E-01 -3.067690551272E-01
8 -3.379350013612E-01 3.099994556439E-01 -3.067690551272E-01
8 4.801992063025E-01 -3.310750185887E-17 4.956578249650E-01
8 1.247353671791E-01 5.000000000000E-01 -1.435912966766E-01
8 2.507864841237E-03 1.841554408899E-19 1.768212209225E-01
8 -1.429906011707E-01 2.018186860997E-18 -1.219030917026E-01
```

```

      8      7.001017431963E-02  1.873620964908E-01 -2.362955768687E-02
      8      7.001017431963E-02 -1.873620964908E-01 -2.362955768687E-02
FREQCALC
END
END
20 7
0 0 8 2. 1.
191300. 0.0002204
26970. 0.001925
5696. 0.01109
1489.4 0.04995
448.3 0.17014
154.62 0.3685
60.37 0.4034
25.09 0.1452
0 1 6 8. 1.
448.6 -0.00575 0.00847
105.7 -0.0767 0.06027
34.69 -0.1122 0.2124
13.50 0.2537 0.3771
5.820 0.688 0.401
1.819 0.349 0.198
0 1 5 8. 1.
20.75 -0.0020 -0.0365
8.40 -0.1255 -0.0685
3.597 -0.6960 0.1570
1.408 1.029 1.482
0.726 0.944 1.025
0 1 1 2. 1.
0.453 1. 1.
0 1 1 0. 1.
0.295 1. 1.
0 3 2 0. 1.
3.1910 0.160
0.8683 0.313
0 3 1 0. 1.
0.2891 0.406
14 6
0 0 8 2. 1.0
87645.8 0.000237
12851.8 0.00192
2786.28 0.0109
728.043 0.0496
219.516 0.1668
75.9006 0.363
29.4602 0.4051
11.9891 0.1504
0 1 6 8. 1.0
165.958 -0.00884 0.00909
39.3727 -0.0859 0.0601
12.7112 -0.0712 0.1952
4.777 0.4147 0.3384
1.8482 0.6168 0.3006
0.7365 0.1154 0.0648
0 1 3 4. 1.
4.1752 -0.0199 -0.0087
1.4472 -0.1864 -0.00438
0.5023 0.0967 0.2207
0 1 1 0. 1.
0.322 1. 1.
0 1 1 0. 1.
0.13 1. 1.
0 3 1 0. 1.
0.6 1.
8 6
0 0 8 2.0 1.0
8020. 0.001080
1338. 0.008040
255.4 0.053240
69.22 0.168100
23.90 0.358100
9.264 0.385500
3.851 0.146800
1.212 0.072800
0 1 4 6. 1.0
49.43 -0.008830 0.009580
10.47 -0.091500 0.069600
3.235 -0.040200 0.206500
1.217 0.379000 0.347000

```

```

0 1 1 0. 1.0
0.486 1. 1.
0 1 1 0. 1.0
0.1925 1. 1.
0 3 1 0. 1.
2.0 1.
0 3 1 0. 1.
0.500 1.
99 0
ENDBS
SCFDIR
DFT
CORRELAT
VWN
EXCHANGE
LDA
XLGRID
END
SHRINK
4 4 4
TOLINTEG
6 6 6 6 12
FMIXING
75
MAXCYCLE
800
LEVSHIFT
6 1
TOLDEE
10
END
== Executing: /usr/bin/mpirun.mpich -np 8 -v -machinefile /home/vlasta/crystal/tmp/tmp2648/machines
/home/vlasta/crystal/tmp/tmp2648/PCrystal
host: lmfz640

```

```
=====
mpiexec options:
```

```

-----
Base path: /usr/bin/
Launcher: (null)
Debug level: 1
Enable X: -1

```

```
Global environment:
```

```

-----
EXCITINGVISUAL=/usr/share/exciting/xml/visualizationtemplates
LS_COL-
ORS=rs=0;di=01;34:ln=01;36:mh=00;pi=40;33:so=01;35:do=01;35:bd=40;33;01:cd=40;33;01:or=40;31;01:mi=00:su=37;4
1:sg=30;43:ca=30;41:tw=30;42:ow=34;42:st=37;44:ex=01;32:*.tar=01;31:*.tgz=01;31:*.arc=01;31:*.arj=01;31:*.taz
=01;31:*.lha=01;31:*.lz4=01;31:*.lzh=01;31:*.lzma=01;31:*.tlz=01;31:*.txz=01;31:*.tzo=01;31:*.t7z=01;31:*.zip
=01;31:*.z=01;31:*.Z=01;31:*.dz=01;31:*.gz=01;31:*.lrz=01;31:*.lz=01;31:*.lzo=01;31:*.xz=01;31:*.zst=01;31:*.
tzst=01;31:*.bz2=01;31:*.bz=01;31:*.tbz=01;31:*.tbz2=01;31:*.tz=01;31:*.deb=01;31:*.rpm=01;31:*.jar=01;31:*.w
ar=01;31:*.ear=01;31:*.sar=01;31:*.rar=01;31:*.alz=01;31:*.ace=01;31:*.zoo=01;31:*.cpio=01;31:*.7z=01;31:*.rz
=01;31:*.cab=01;31:*.wim=01;31:*.swm=01;31:*.dwm=01;31:*.esd=01;31:*.jpg=01;35:*.jpeg=01;35:*.mjpg=01;35:*.mj
peg=01;35:*.gif=01;35:*.bmp=01;35:*.pbm=01;35:*.pgm=01;35:*.ppm=01;35:*.tga=01;35:*.xbm=01;35:*.xpm=01;35:*.t
if=01;35:*.tiff=01;35:*.png=01;35:*.svg=01;35:*.svgz=01;35:*.mng=01;35:*.pcx=01;35:*.mov=01;35:*.mpg=01;35:*.
mpeg=01;35:*.m2v=01;35:*.mkv=01;35:*.webm=01;35:*.ogm=01;35:*.mp4=01;35:*.m4v=01;35:*.mp4v=01;35:*.vob=01;35:
*.qt=01;35:*.nuv=01;35:*.wmv=01;35:*.asf=01;35:*.rm=01;35:*.rmvb=01;35:*.flc=01;35:*.avi=01;35:*.fli=01;35:*.
flv=01;35:*.gl=01;35:*.dl=01;35:*.xcf=01;35:*.xwd=01;35:*.yuv=01;35:*.cgm=01;35:*.emf=01;35:*.ogv=01;35:*.ogx
=01;35:*.aac=00;36:*.au=00;36:*.flac=00;36:*.m4a=00;36:*.mid=00;36:*.midi=00;36:*.mka=00;36:*.mp3=00;36:*.mpc
=00;36:*.ogg=00;36:*.ra=00;36:*.wav=00;36:*.oga=00;36:*.opus=00;36:*.spx=00;36:*.xspf=00;36:
LD_LIBRARY_PATH=/usr/local/gaus/g16/bsd:/usr/local/gaus/g16:/usr/local/gaus/gv/lib
GPAW_SETUP_PATH=/usr/share/gpaw-setups
GAUSS_BSDDIR=/usr/local/gaus/g16/bsd
GRA6_EXEDIR=/home/vlasta/crystal/crgra2006/bin/Linux-pgf
CMR_REPOSITORY=/home/vlasta/cmr
LC_MEASUREMENT=hr_HR.UTF-8
SSH_CONNECTION=10.135.24.32 50621 10.135.24.38 22
LESSCLOSE=/usr/bin/lesspipe %s %s
LC_PAPER=hr_HR.UTF-8
LC_MONETARY=hr_HR.UTF-8
LANG=en_US.UTF-8
g16root=/usr/local/gaus
PSEUDO_DIR=/home/vlasta/md/potentials/UPF
CRY2K6_GRA=/home/vlasta/crystal/crgra2006
DSM_BARRIER=SHM
DACAPOPATH=/usr/share/dacapo-psp
OPENBLAS_NUM_THREADS=1
OLDPWD=/home/vlasta/crystal/tmp/c3s

```

```

XCrySDen TOPDIR=/usr/local/share/XCrySDen/
TMP_DIR=/home/vlasta/crystal/tmp/tmp2648
EXCITINGATAT=/home/vlasta/md/run/excitingscripts/ATAT@exciting
GV_DIR=/usr/local/haus/gv
DACAPOEXE_SERIAL=/usr/bin/dacapo_serial.run
CRY2K9_SCRDIR=/home/vlasta/crystal/tmp
SIESTA_SCRIPT=/home/vlasta/bin/run_siesta.py
LC_NAME=hr_HR.UTF-8
GAUSS_LEXEDIR=/usr/local/haus/g16/linda-exe
XDG_SESSION_ID=10
USER=vlasta
EXCITINGRUNDIR=/home/vlasta/md/run
CRY2K9_TEST=/home/vlasta/crystal/test_cases/inputs
VERSION=v2_0_1
HOTBIT_PARAMETERS=/usr/share/doc/hotbit/param/fixed_parameters
KSSOLVPATH=/home/vlasta/md/kssolv
NSLOTS=8
GAUSS_ARCHDIR=/usr/local/haus/g16/arch
ABINIT_PP_PATH=/usr/local/share/abinit-pseudopotentials//GGA_PAW:/usr/local/share/abinit-pseudopotentials//GGA_HGHK:/usr/local/share/abinit-pseudopotentials//GGA_FHI:/usr/local/share/abinit-pseudopotentials//LDA_TM:/usr/local/share/abinit-pseudopotentials//LDA_PAW:/usr/local/share/abinit-pseudopotentials//LDA_HGH:/usr/local/share/abinit-pseudopotentials//GGA_FHI:/usr/local/share/abinit-pseudopotentials//LDA_FHI:/usr/share/doc/abinit-doc/tests/Psps_for_tests
PWD=/home/vlasta/crystal/tmp/tmp2648
EXCITINGROOT=/usr
HOME=/home/vlasta
CRY2K9_UTILS=/home/vlasta/crystal/utills09
SSH_CLIENT=10.135.24.32 50621 22
DFTB_COMMAND=dftb+
TIMEFORMAT= Elapsed time = %01R
GMXCMD=mpirun -np 4 mdrun_mpi
PW_ROOT=/usr
DFTB_PREFIX=/home/vlasta/md/potentials/slako/pbc-0-3/
GAUSS_EXEDIR=/usr/local/haus/g16/bsd:/usr/local/haus/g16
MALLOCCHECK_=0
SIESTA_PP_PATH=.
CRY2K9_EXEDIR=/home/vlasta/crystal/bin/Linux-ifort
EXCITINGASE=/home/vlasta/md/run/excitingscripts/ase
ASE_ABINIT_COMMAND=mpirun -np 2 abinit < PREFIX.files > PREFIX.log
LC_ADDRESS=hr_HR.UTF-8
LC_NUMERIC=hr_HR.UTF-8
DACAPOEXE_PARALLEL=/usr/bin/dacapo_mpi.run
FLEUR_INPGEN=/home/vlasta/bin/inpgen.x
SSH_TTY=/dev/pts/0
MAIL=/var/mail/vlasta
PAPERSIZE=a4
ELK_SPECIES_PATH=/usr/local/share/elk-dft/species/
SHELL=/bin/bash
TERM=xterm
CRY2K9_ROOT=/home/vlasta/crystal
CRY2K9_ARCH=Linux-ifort
CRY2K9_BIN=bin
G16BASIS=/usr/local/haus/g16/basis
FLEUR=/home/vlasta/bin/fleur.x
LAMMPS_COMMAND=/usr/bin/lammps
SHLV=2
LANGUAGE=en_US:en
PYTHONPATH=/usr/local/haus/gauopen:/usr/local/haus/g16/bsd:/usr/local/haus/g16
LC_TELEPHONE=hr_HR.UTF-8
LOGNAME=vlasta
DBUS_SESSION_BUS_ADDRESS=unix:path=/run/user/1003/bus
XDG_RUNTIME_DIR=/run/user/1003
EXCITINGSHARE=/usr/share/exciting
HOTBIT_DIR=/usr/share/doc/hotbit/examples
PATH=/home/vlasta/crystal/tmp/tmp2648:/usr/local/share/XCrySDen:/usr/local/sbin:/usr/local/bin:/usr/sbin:/usr/bin:/sbin:/bin:/usr/games:/usr/local/games:/home/vlasta/crystal/bin/Linux-ifort:/home/vlasta/crystal/utills09:/home/vlasta/crystal/crgra2006:/home/vlasta/md/run/excitingscripts:/home/vlasta/md/run/excitingscripts/ATAT@exciting:/usr/local/haus/gauopen:/usr/local/haus/g16/bsd:/usr/local/haus/g16:/home/tmpacc/QuantumWise/atkvnl/bin:/home/tmpacc/QuantumWise/atkvtkpython/bin:/home/tmpacc/QuantumWise/atkvlicense:/usr/local/share/XCrySDen//scripts:/usr/local/share/XCrySDen//util
LC_IDENTIFICATION=hr_HR.UTF-8
PERLLIB=/usr/local/haus/gauopen:/usr/local/haus/g16/bsd:/usr/local/haus/g16
EXCITINGSCRIPTS=/home/vlasta/md/run/excitingscripts
PGI_TERM=trace,abort
XCrySDen SCRATCH=/tmp
XLIB_SKIP_RGB_VISUALS=1
ATATROOT=/home/vlasta/md/run/excitingscripts/atat
EXCITINGBIN=/usr/bin

```

```
LESSOPEN=| /usr/bin/lesspipe %s
OMP_NUM_THREADS=2
LC_TIME=hr HR.UTF-8
_=/usr/bin/mpirun.mpicsh
```

Hydra internal environment:

-----  
GFORTTRAN\_UNBUFFERED\_PRECONNECTED=y

Proxy information:

\*\*\*\*\*

[1] proxy: lmfz640 (8 cores)

Exec list: /home/vlasta/crystal/tmp/tmp2648/Pcrystal (8 processes);

=====

```
[mpiexec@lmfz640] Timeout set to -1 (-1 means infinite)
[mpiexec@lmfz640] Got a control port string of lmfz640:44891
```

Proxy launch args: /usr/bin/hydra\_pmi\_proxy --control-port lmfz640:44891 --debug --rmk user --launcher ssh --demux poll --pgid 0 --retries 10 --usize -2 --proxy-id

Arguments being passed to proxy 0:

```
--version 3.3a2 --iface-ip-env-name MPIR_CVAR_CH3_INTERFACE_HOSTNAME --hostname lmfz640 --global-core-map
0,8,8 --pmi-id-map 0,0 --global-process-count 8 --auto-cleanup 1 --pmi-kvsname kvs_2689_0 --pmi-process-map-
ping (vector, (0,1,8)) --ckptpoint-num -1 --global-inherited-env 93 'EXCITINGVISUAL=/usr/share/exciting/xml/vis-
ualizationtemplates' 'LS_COL-
ORS=rs=0:di=01;34:ln=01;36:mh=00:pi=40;33:so=01;35:do=01;35:bd=40;33;01:cd=40;33;01:or=40;31;01:mi=00:su=37;4
1:sg=30;43:ca=30;41:tw=30;42:ow=34;42:st=37;44:ex=01;32:*.tar=01;31:*.tgz=01;31:*.arc=01;31:*.arj=01;31:*.taz
=01;31:*.lha=01;31:*.lz4=01;31:*.lzh=01;31:*.lzma=01;31:*.tlz=01;31:*.txz=01;31:*.tzo=01;31:*.t7z=01;31:*.zip
=01;31:*.z=01;31:*.Z=01;31:*.dz=01;31:*.gz=01;31:*.lrz=01;31:*.lz=01;31:*.lzo=01;31:*.xz=01;31:*.zst=01;31:*.
tztst=01;31:*.bz2=01;31:*.bz=01;31:*.tbz=01;31:*.tbz2=01;31:*.tz=01;31:*.deb=01;31:*.rpm=01;31:*.jar=01;31:*.w
ar=01;31:*.ear=01;31:*.sar=01;31:*.rar=01;31:*.alz=01;31:*.ace=01;31:*.zoo=01;31:*.cpio=01;31:*.7z=01;31:*.rz
=01;31:*.cab=01;31:*.wim=01;31:*.swm=01;31:*.dwm=01;31:*.esd=01;31:*.jpg=01;35:*.jpeg=01;35:*.mjpg=01;35:*.mj
peg=01;35:*.gif=01;35:*.bmp=01;35:*.pbm=01;35:*.pgm=01;35:*.ppm=01;35:*.tga=01;35:*.xbm=01;35:*.xpm=01;35:*.t
if=01;35:*.tiff=01;35:*.png=01;35:*.svg=01;35:*.svgz=01;35:*.mng=01;35:*.pcx=01;35:*.mov=01;35:*.mpg=01;35:*.
mpeg=01;35:*.m2v=01;35:*.mkv=01;35:*.webm=01;35:*.ogm=01;35:*.mp4=01;35:*.m4v=01;35:*.mp4v=01;35:*.vob=01;35:
*.qt=01;35:*.nuv=01;35:*.wmv=01;35:*.asf=01;35:*.rm=01;35:*.rmvb=01;35:*.flc=01;35:*.avi=01;35:*.fli=01;35:*.
flv=01;35:*.gl=01;35:*.dl=01;35:*.xcf=01;35:*.xwd=01;35:*.yuv=01;35:*.cgm=01;35:*.emf=01;35:*.ogv=01;35:*.ogx
=01;35:*.aac=00;36:*.au=00;36:*.flac=00;36:*.m4a=00;36:*.mid=00;36:*.midi=00;36:*.mka=00;36:*.mp3=00;36:*.mpc
=00;36:*.ogg=00;36:*.ra=00;36:*.wav=00;36:*.oga=00;36:*.opus=00;36:*.spx=00;36:*.xspf=00;36:' 'LD_LI-
BRARY_PATH=/usr/local/gaus/g16/bsd:/usr/local/gaus/g16:/usr/local/gaus/gv/lib'
'GPAW_SETUP_PATH=/usr/share/gpaw-setups' 'GAUSS_BSDDIR=/usr/local/gaus/g16/bsd' 'GRA6_EX-
EDIR=/home/vlasta/crystal/crgra2006/bin/Linux-pgf' 'CMR_REPOSITORY=/home/vlasta/cmr' 'LC_MEASURE-
MENT=hr HR.UTF-8' 'SSH_CONNECTION=10.135.24.32 50621 10.135.24.38 22' 'LESSCLOSE=/usr/bin/lesspipe %s %s'
'LC_PAPER=hr HR.UTF-8' 'LC_MONETARY=hr HR.UTF-8' 'LANG=en_US.UTF-8' 'g16root=/usr/local/gaus'
'PSEUDO_DIR=/home/vlasta/md/potentials/UPF' 'CRY2K6_GRA=/home/vlasta/crystal/crgra2006' 'DSM_BARRIER=SHM'
'DACAPOPATH=/usr/share/dacapo-psp' 'OPENBLAS_NUM_THREADS=1' 'OLDPWD=/home/vlasta/crystal/tmp/c3s' 'XCRYSD-
DEN_TOPDIR=/usr/local/share/XCrySDen/' 'TMP_DIR=/home/vlasta/crystal/tmp/tmp2648' 'EXCIT-
INGATAT=/home/vlasta/md/run/excitingscripts/ATAT@exciting' 'GV_DIR=/usr/local/gaus/gv' 'DACAPOEXE_SE-
RIAL=/usr/bin/dacapo_serial.run' 'CRY2K9_SCRDIR=/home/vlasta/crystal/tmp' 'SI-
ESTA_SCRIPT=/home/vlasta/bin/run_siesta.py' 'LC_NAME=hr HR.UTF-8' 'GAUSS_LEXEDIR=/usr/local/gaus/g16/linda-
exe' 'XDG_SESSION_ID=10' 'USER=vlasta' 'EXCITINGRUNDIR=/home/vlasta/md/run' 'CRY2K9_TEST=/home/vlasta/crys-
tal/test_cases/inputs' 'VERSION=v2_0_1' 'HOTBIT_PARAMETERS=/usr/share/doc/hotbit/param/fixed_parameters'
'KSSOLVPATH=/home/vlasta/md/kssolv' 'NSLOTS=8' 'GAUSS_ARCHDIR=/usr/local/gaus/g16/arch'
'ABINIT_PP_PATH=/usr/local/share/abinit-pseudopotentials//GGA_PAW:/usr/local/share/abinit-pseudopoten-
tials//GGA_HGHK:/usr/local/share/abinit-pseudopotentials//GGA_FHI:/usr/local/share/abinit-pseudopoten-
tials//LDA_TM:/usr/local/share/abinit-pseudopotentials//LDA_PAW:/usr/local/share/abinit-pseudopoten-
tials//LDA_HGH:/usr/local/share/abinit-pseudopotentials//GGA_FHI:/usr/local/share/abinit-pseudopoten-
tials//LDA_FHI:/usr/share/doc/abinit-doc/tests/Psps_for_tests' 'PWD=/home/vlasta/crystal/tmp/tmp2648' 'EXCIT-
INGROOT=/usr' 'HOME=/home/vlasta' 'CRY2K9_UTILS=/home/vlasta/crystal/utills09' 'SSH_CLIENT=10.135.24.32 50621
22' 'DFTB_COMMAND=dftb+' 'TIMEFORMAT= Elapsed time = %01R' 'GMXCMD=mpirun -np 4 mdrun_mpi' 'PW_ROOT=/usr'
'DFTB_PREFIX=/home/vlasta/md/potentials/slako/psc-0-3/' 'GAUSS_EXEDIR=/usr/local/gaus/g16/bsd:/usr/lo-
cal/gaus/g16' 'MALLOC_CHECK=0' 'SIESTA_PP_PATH=.' 'CRY2K9_EXEDIR=/home/vlasta/crystal/bin/Linux-ifort' 'EX-
CITINGASE=/home/vlasta/md/run/excitingscripts/ase' 'ASE_ABINIT_COMMAND=mpirun -np 2 abinit < PREFIX.files >
PREFIX.log' 'LC_ADDRESS=hr HR.UTF-8' 'LC_NUMERIC=hr HR.UTF-8' 'DACAPOEXE_PARALLEL=/usr/bin/dacapo_mpi.run'
'FLEUR_INPGEN=/home/vlasta/bin/inpgen.x' 'SSH_TTY=/dev/pts/0' 'MAIL=/var/mail/vlasta' 'PAPERSIZE=a4'
'ELK_SPECIES_PATH=/usr/local/share/elk-dft/species/' 'SHELL=/bin/bash' 'TERM=xterm'
'CRY2K9_ROOT=/home/vlasta/crystal' 'CRY2K9_ARCH=Linux-ifort' 'CRY2K9_BIN=bin' 'G16BASIS=/usr/lo-
cal/gaus/g16/basis' 'FLEUR=/home/vlasta/bin/fleur.x' 'LAMMPS_COMMAND=/usr/bin/lammps' 'SHLVL=2' 'LAN-
GUAGE=en_US:en' 'PYTHONPATH=/usr/local/gaus/gauopen:/usr/local/gaus/g16/bsd:/usr/local/gaus/g16' 'LC_TELE-
PHONE=hr HR.UTF-8' 'LOGNAME=vlasta' 'DBUS_SESSION_BUS_ADDRESS=unix:path=/run/user/1003/bus'
'XDG_RUNTIME_DIR=/run/user/1003' 'EXCITINGSHARE=/usr/share/exciting' 'HOTBIT_DIR=/usr/share/doc/hotbit/exam-
ples' 'PATH=/home/vlasta/crystal/tmp/tmp2648::usr/local/share/XCrySDen::usr/local/sbin:/usr/lo-
cal/bin:/usr/sbin:/usr/bin:/sbin:/bin:/usr/games:/usr/local/games:./:/home/vlasta/crystal/bin/Linux-
ifort:/home/vlasta/crystal/utills09:/home/vlasta/crystal/crgra2006:/home/vlasta/md/run/exciting-
```

```
scripts:/home/vlasta/md/run/excitingscripts/ATAT@exciting:/usr/local/kaus/gauopen:/usr/local/kaus/g16/bsd:/usr/local/kaus/g16:/home/tmpacc/QuantumWise/atk/vnl/bin:/home/tmpacc/QuantumWise/atk/atkpython/bin:/home/tmpacc/QuantumWise/atk/license:/usr/local/share/XCrySDen//scripts:/usr/local/share/XCrySDen//util' 'LC_IDENTIFICATION=hr_HR.UTF-8' 'PERLLIB=/usr/local/kaus/gauopen:/usr/local/kaus/g16/bsd:/usr/local/kaus/g16' 'EXCITINGSERIPITS=/home/vlasta/md/run/excitingscripts' 'PGI_TERM=trace,abort' 'XCrySDEN_SCRATCH=/tmp' 'XLIB_SKIP_ARGB_VISUALS=1' 'ATATROOT=/home/vlasta/md/run/excitingscripts/atat' 'EXCITINGBIN=/usr/bin' 'LESSOPEN=| /usr/bin/lesspipe %s' 'OMP_NUM_THREADS=2' 'LC_TIME=hr_HR.UTF-8' '=/usr/bin/mpi-run.mpih' --global-user-env 0 --global-system-env 1 'GFORTRAN_UNBUFFERED_PRECONNECTED=y' --proxy-core-count 8 --exec --exec-appnum 0 --exec-proc-count 8 --exec-local-env 0 --exec-wdir /home/vlasta/crystal/tmp/tmp2648 --exec-args 1 /home/vlasta/crystal/tmp/tmp2648/Prystal
```

```
[mpiexec@lmfz640] Launch arguments: /usr/bin/hydra_pmi_proxy --control-port lmfz640:44891 --debug --rmk user --launcher ssh --demux poll --pgid 0 --retries 10 --usize -2 --proxy-id 0
```

```
[proxy:0:0@lmfz640] got pmi command (from 0): init
```

```
pmi_version=1 pmi_subversion=1
```

```
[proxy:0:0@lmfz640] PMI response: cmd=response_to_init pmi_version=1 pmi_subversion=1 rc=0
```

```
[proxy:0:0@lmfz640] got pmi command (from 0): get_maxes
```

```
[proxy:0:0@lmfz640] PMI response: cmd=maxes kvname_max=256 keylen_max=64 vallen_max=1024
```

```
[proxy:0:0@lmfz640] got pmi command (from 6): init
```

```
pmi_version=1 pmi_subversion=1
```

```
[proxy:0:0@lmfz640] PMI response: cmd=response_to_init pmi_version=1 pmi_subversion=1 rc=0
```

```
[proxy:0:0@lmfz640] got pmi command (from 8): init
```

```
pmi_version=1 pmi_subversion=1
```

```
[proxy:0:0@lmfz640] PMI response: cmd=response_to_init pmi_version=1 pmi_subversion=1 rc=0
```

```
[proxy:0:0@lmfz640] got pmi command (from 13): init
```

```
pmi_version=1 pmi_subversion=1
```

```
[proxy:0:0@lmfz640] PMI response: cmd=response_to_init pmi_version=1 pmi_subversion=1 rc=0
```

```
[proxy:0:0@lmfz640] got pmi command (from 17): init
```

```
pmi_version=1 pmi_subversion=1
```

```
[proxy:0:0@lmfz640] PMI response: cmd=response_to_init pmi_version=1 pmi_subversion=1 rc=0
```

```
[proxy:0:0@lmfz640] got pmi command (from 21): init
```

```
pmi_version=1 pmi_subversion=1
```

```
[proxy:0:0@lmfz640] PMI response: cmd=response_to_init pmi_version=1 pmi_subversion=1 rc=0
```

```
[proxy:0:0@lmfz640] got pmi command (from 0): get_appnum
```

```
[proxy:0:0@lmfz640] PMI response: cmd=appnum appnum=0
```

```
[proxy:0:0@lmfz640] got pmi command (from 6): get_maxes
```

```
[proxy:0:0@lmfz640] PMI response: cmd=maxes kvname_max=256 keylen_max=64 vallen_max=1024
```

```
[proxy:0:0@lmfz640] got pmi command (from 8): get_maxes
```

```
[proxy:0:0@lmfz640] PMI response: cmd=maxes kvname_max=256 keylen_max=64 vallen_max=1024
```

```
[proxy:0:0@lmfz640] got pmi command (from 13): get_maxes
```

```
[proxy:0:0@lmfz640] PMI response: cmd=maxes kvname_max=256 keylen_max=64 vallen_max=1024
```

```
[proxy:0:0@lmfz640] got pmi command (from 17): get_maxes
```

```
[proxy:0:0@lmfz640] PMI response: cmd=maxes kvname_max=256 keylen_max=64 vallen_max=1024
```

```
[proxy:0:0@lmfz640] got pmi command (from 25): init
```

```
pmi_version=1 pmi_subversion=1
```

```
[proxy:0:0@lmfz640] PMI response: cmd=response_to_init pmi_version=1 pmi_subversion=1 rc=0
```

```
[proxy:0:0@lmfz640] got pmi command (from 29): init
```

```
pmi_version=1 pmi_subversion=1
```

```
[proxy:0:0@lmfz640] PMI response: cmd=response_to_init pmi_version=1 pmi_subversion=1 rc=0
```

```
[proxy:0:0@lmfz640] got pmi command (from 0): get_my_kvname
```

```
[proxy:0:0@lmfz640] PMI response: cmd=my_kvname kvname=kvs_2689_0
```

```
[proxy:0:0@lmfz640] got pmi command (from 6): get_appnum
```

```
[proxy:0:0@lmfz640] PMI response: cmd=appnum appnum=0
```

```
[proxy:0:0@lmfz640] got pmi command (from 8): get_appnum
```

```
[proxy:0:0@lmfz640] PMI response: cmd=appnum appnum=0
```

```
[proxy:0:0@lmfz640] got pmi command (from 13): get_appnum
```

```
[proxy:0:0@lmfz640] PMI response: cmd=appnum appnum=0
```

```
[proxy:0:0@lmfz640] got pmi command (from 17): get_appnum
```

```
[proxy:0:0@lmfz640] PMI response: cmd=appnum appnum=0
```

```
[proxy:0:0@lmfz640] got pmi command (from 21): get_maxes
```

```
[proxy:0:0@lmfz640] PMI response: cmd=maxes kvname_max=256 keylen_max=64 vallen_max=1024
```

```
[proxy:0:0@lmfz640] got pmi command (from 25): get_maxes
```

```
[proxy:0:0@lmfz640] PMI response: cmd=maxes kvname_max=256 keylen_max=64 vallen_max=1024
```

```
[proxy:0:0@lmfz640] got pmi command (from 0): get_my_kvname
```

```
[proxy:0:0@lmfz640] PMI response: cmd=my_kvname kvname=kvs_2689_0
```



```

[proxy:0:0@lmfz640] got pmi command (from 6): get_my_kvsnam

[proxy:0:0@lmfz640] PMI response: cmd=my_kvsnam kvsnam=kvs_2689_0
[proxy:0:0@lmfz640] got pmi command (from 8): get_my_kvsnam

[proxy:0:0@lmfz640] PMI response: cmd=my_kvsnam kvsnam=kvs_2689_0
[proxy:0:0@lmfz640] got pmi command (from 13): get_my_kvsnam

[proxy:0:0@lmfz640] PMI response: cmd=my_kvsnam kvsnam=kvs_2689_0
[proxy:0:0@lmfz640] got pmi command (from 17): get_my_kvsnam

[proxy:0:0@lmfz640] PMI response: cmd=my_kvsnam kvsnam=kvs_2689_0
[proxy:0:0@lmfz640] got pmi command (from 21): get_appnum

[proxy:0:0@lmfz640] PMI response: cmd=appnum appnum=0
[proxy:0:0@lmfz640] got pmi command (from 29): get_maxes

[proxy:0:0@lmfz640] PMI response: cmd=maxes kvsnam_max=256 keylen_max=64 vallen_max=1024
[proxy:0:0@lmfz640] got pmi command (from 0): get
kvsnam=kvs_2689_0 key=PMI_process_mapping
[proxy:0:0@lmfz640] PMI response: cmd=get_result rc=0 msg=success value=(vector, (0,1,8))
[proxy:0:0@lmfz640] got pmi command (from 6): get_my_kvsnam

[proxy:0:0@lmfz640] PMI response: cmd=my_kvsnam kvsnam=kvs_2689_0
[proxy:0:0@lmfz640] got pmi command (from 8): get_my_kvsnam

[proxy:0:0@lmfz640] PMI response: cmd=my_kvsnam kvsnam=kvs_2689_0
[proxy:0:0@lmfz640] got pmi command (from 13): get_my_kvsnam

[proxy:0:0@lmfz640] PMI response: cmd=my_kvsnam kvsnam=kvs_2689_0
[proxy:0:0@lmfz640] got pmi command (from 17): get_my_kvsnam

[proxy:0:0@lmfz640] PMI response: cmd=my_kvsnam kvsnam=kvs_2689_0
[proxy:0:0@lmfz640] got pmi command (from 21): get_my_kvsnam

[proxy:0:0@lmfz640] PMI response: cmd=my_kvsnam kvsnam=kvs_2689_0
[proxy:0:0@lmfz640] got pmi command (from 25): get_appnum

[proxy:0:0@lmfz640] PMI response: cmd=appnum appnum=0
[proxy:0:0@lmfz640] got pmi command (from 0): put
kvsnam=kvs_2689_0 key=sharedFilename[0] value=/dev/shm/mpich_shar_tmpMLEk6n
[proxy:0:0@lmfz640] cached command: sharedFilename[0]=/dev/shm/mpich_shar_tmpMLEk6n
[proxy:0:0@lmfz640] PMI response: cmd=put_result rc=0 msg=success
[proxy:0:0@lmfz640] got pmi command (from 6): get
kvsnam=kvs_2689_0 key=PMI_process_mapping
[proxy:0:0@lmfz640] PMI response: cmd=get_result rc=0 msg=success value=(vector, (0,1,8))
[proxy:0:0@lmfz640] got pmi command (from 8): get
kvsnam=kvs_2689_0 key=PMI_process_mapping
[proxy:0:0@lmfz640] PMI response: cmd=get_result rc=0 msg=success value=(vector, (0,1,8))
[proxy:0:0@lmfz640] got pmi command (from 13): get
kvsnam=kvs_2689_0 key=PMI_process_mapping
[proxy:0:0@lmfz640] PMI response: cmd=get_result rc=0 msg=success value=(vector, (0,1,8))
[proxy:0:0@lmfz640] got pmi command (from 17): get
kvsnam=kvs_2689_0 key=PMI_process_mapping
[proxy:0:0@lmfz640] PMI response: cmd=get_result rc=0 msg=success value=(vector, (0,1,8))
[proxy:0:0@lmfz640] got pmi command (from 21): get_my_kvsnam

[proxy:0:0@lmfz640] PMI response: cmd=my_kvsnam kvsnam=kvs_2689_0
[proxy:0:0@lmfz640] got pmi command (from 29): get_appnum

[proxy:0:0@lmfz640] PMI response: cmd=appnum appnum=0
[proxy:0:0@lmfz640] got pmi command (from 0): barrier_in

[proxy:0:0@lmfz640] got pmi command (from 6): barrier_in

[proxy:0:0@lmfz640] got pmi command (from 8): barrier_in

[proxy:0:0@lmfz640] got pmi command (from 13): barrier_in

[proxy:0:0@lmfz640] got pmi command (from 17): barrier_in

[proxy:0:0@lmfz640] got pmi command (from 21): get
kvsnam=kvs_2689_0 key=PMI_process_mapping
[proxy:0:0@lmfz640] PMI response: cmd=get_result rc=0 msg=success value=(vector, (0,1,8))
[proxy:0:0@lmfz640] got pmi command (from 25): get_my_kvsnam

[proxy:0:0@lmfz640] PMI response: cmd=my_kvsnam kvsnam=kvs_2689_0
[proxy:0:0@lmfz640] got pmi command (from 21): barrier_in

```

```
[proxy:0:0@lmfz640] got pmi command (from 29): get_my_kvsnam

[proxy:0:0@lmfz640] PMI response: cmd=my_kvsnam kvsnam=kvs_2689_0
[proxy:0:0@lmfz640] got pmi command (from 25): get_my_kvsnam

[proxy:0:0@lmfz640] PMI response: cmd=my_kvsnam kvsnam=kvs_2689_0
[proxy:0:0@lmfz640] got pmi command (from 29): get_my_kvsnam

[proxy:0:0@lmfz640] PMI response: cmd=my_kvsnam kvsnam=kvs_2689_0
[proxy:0:0@lmfz640] got pmi command (from 25): get
kvsnam=kvs_2689_0 key=PMI_process_mapping
[proxy:0:0@lmfz640] PMI response: cmd=get_result rc=0 msg=success value=(vector, (0,1,8))
[proxy:0:0@lmfz640] got pmi command (from 29): get
kvsnam=kvs_2689_0 key=PMI_process_mapping
[proxy:0:0@lmfz640] PMI response: cmd=get_result rc=0 msg=success value=(vector, (0,1,8))
[proxy:0:0@lmfz640] got pmi command (from 25): barrier_in

[proxy:0:0@lmfz640] got pmi command (from 29): barrier_in

[proxy:0:0@lmfz640] flushing 1 put command(s) out
[proxy:0:0@lmfz640] forwarding command (cmd=put sharedFilename[0]=/dev/shm/mpich_shar_tmpMLEk6n) upstream
[mpiexec@lmfz640] [pgid: 0] got PMI command: cmd=put sharedFilename[0]=/dev/shm/mpich_shar_tmpMLEk6n
[proxy:0:0@lmfz640] forwarding command (cmd=barrier_in) upstream
[mpiexec@lmfz640] [pgid: 0] got PMI command: cmd=barrier_in
[mpiexec@lmfz640] PMI response to fd 6 pid 29: cmd=keyval_cache sharedFilename[0]=/dev/shm/mpich_shar_tmpM-
LEk6n
[mpiexec@lmfz640] PMI response to fd 6 pid 29: cmd=barrier_out
[proxy:0:0@lmfz640] PMI response: cmd=barrier_out
[proxy:0:0@lmfz640] got pmi command (from 17): get
kvsnam=kvs_2689_0 key=sharedFilename[0]
[proxy:0:0@lmfz640] PMI response: cmd=get_result rc=0 msg=success value=/dev/shm/mpich_shar_tmpMLEk6n
[proxy:0:0@lmfz640] got pmi command (from 25): get
kvsnam=kvs_2689_0 key=sharedFilename[0]
[proxy:0:0@lmfz640] PMI response: cmd=get_result rc=0 msg=success value=/dev/shm/mpich_shar_tmpMLEk6n
[proxy:0:0@lmfz640] got pmi command (from 6): get
kvsnam=kvs_2689_0 key=sharedFilename[0]
[proxy:0:0@lmfz640] PMI response: cmd=get_result rc=0 msg=success value=/dev/shm/mpich_shar_tmpMLEk6n
[proxy:0:0@lmfz640] got pmi command (from 8): get
kvsnam=kvs_2689_0 key=sharedFilename[0]
[proxy:0:0@lmfz640] PMI response: cmd=get_result rc=0 msg=success value=/dev/shm/mpich_shar_tmpMLEk6n
[proxy:0:0@lmfz640] got pmi command (from 13): get
kvsnam=kvs_2689_0 key=sharedFilename[0]
[proxy:0:0@lmfz640] PMI response: cmd=get_result rc=0 msg=success value=/dev/shm/mpich_shar_tmpMLEk6n
[proxy:0:0@lmfz640] got pmi command (from 21): get
kvsnam=kvs_2689_0 key=sharedFilename[0]
[proxy:0:0@lmfz640] PMI response: cmd=get_result rc=0 msg=success value=/dev/shm/mpich_shar_tmpMLEk6n
[proxy:0:0@lmfz640] got pmi command (from 29): get
kvsnam=kvs_2689_0 key=sharedFilename[0]
[proxy:0:0@lmfz640] PMI response: cmd=get_result rc=0 msg=success value=/dev/shm/mpich_shar_tmpMLEk6n
[proxy:0:0@lmfz640] got pmi command (from 0): put
kvsnam=kvs_2689_0 key=P0-businesscard value=description#lmfz640$port#39501$ifname#10.135.24.38$
[proxy:0:0@lmfz640] cached command: P0-businesscard=description#lmfz640$port#39501$ifname#10.135.24.38$
[proxy:0:0@lmfz640] PMI response: cmd=put_result rc=0 msg=success
[proxy:0:0@lmfz640] got pmi command (from 6): put
kvsnam=kvs_2689_0 key=P1-businesscard value=description#lmfz640$port#52411$ifname#10.135.24.38$
[proxy:0:0@lmfz640] cached command: P1-businesscard=description#lmfz640$port#52411$ifname#10.135.24.38$
[proxy:0:0@lmfz640] PMI response: cmd=put_result rc=0 msg=success
[proxy:0:0@lmfz640] got pmi command (from 8): put
kvsnam=kvs_2689_0 key=P2-businesscard value=description#lmfz640$port#40759$ifname#10.135.24.38$
[proxy:0:0@lmfz640] cached command: P2-businesscard=description#lmfz640$port#40759$ifname#10.135.24.38$
[proxy:0:0@lmfz640] PMI response: cmd=put_result rc=0 msg=success
[proxy:0:0@lmfz640] got pmi command (from 13): put
kvsnam=kvs_2689_0 key=P3-businesscard value=description#lmfz640$port#38407$ifname#10.135.24.38$
[proxy:0:0@lmfz640] cached command: P3-businesscard=description#lmfz640$port#38407$ifname#10.135.24.38$
[proxy:0:0@lmfz640] PMI response: cmd=put_result rc=0 msg=success
[proxy:0:0@lmfz640] got pmi command (from 17): put
kvsnam=kvs_2689_0 key=P4-businesscard value=description#lmfz640$port#39411$ifname#10.135.24.38$
[proxy:0:0@lmfz640] cached command: P4-businesscard=description#lmfz640$port#39411$ifname#10.135.24.38$
[proxy:0:0@lmfz640] PMI response: cmd=put_result rc=0 msg=success
[proxy:0:0@lmfz640] got pmi command (from 21): put
kvsnam=kvs_2689_0 key=P5-businesscard value=description#lmfz640$port#52769$ifname#10.135.24.38$
[proxy:0:0@lmfz640] cached command: P5-businesscard=description#lmfz640$port#52769$ifname#10.135.24.38$
```

```
[proxy:0:0@lmfz640] PMI response: cmd=put_result rc=0 msg=success  
[proxy:0:0@lmfz640] got pmi command (from 25): put  
kvsname=kvs_2689_0 key=P6-businesscard value=description#lmfz640$port#46695$ifname#10.135.24.38$  
[proxy:0:0@lmfz640] cached command: P6-businesscard=description#lmfz640$port#46695$ifname#10.135.24.38$  
[proxy:0:0@lmfz640] PMI response: cmd=put_result rc=0 msg=success  
[proxy:0:0@lmfz640] got pmi command (from 29): put  
kvsname=kvs_2689_0 key=P7-businesscard value=description#lmfz640$port#54707$ifname#10.135.24.38$  
[proxy:0:0@lmfz640] cached command: P7-businesscard=description#lmfz640$port#54707$ifname#10.135.24.38$  
[proxy:0:0@lmfz640] PMI response: cmd=put_result rc=0 msg=success  
[proxy:0:0@lmfz640] got pmi command (from 0): barrier_in  
  
[proxy:0:0@lmfz640] got pmi command (from 6): barrier_in  
  
[proxy:0:0@lmfz640] got pmi command (from 8): barrier_in  
  
[proxy:0:0@lmfz640] got pmi command (from 13): barrier_in  
  
[proxy:0:0@lmfz640] got pmi command (from 17): barrier_in  
  
[proxy:0:0@lmfz640] got pmi command (from 21): barrier_in  
  
[proxy:0:0@lmfz640] got pmi command (from 25): barrier_in  
  
[proxy:0:0@lmfz640] got pmi command (from 29): barrier_in  
  
[proxy:0:0@lmfz640] flushing 8 put command(s) out  
[proxy:0:0@lmfz640] forwarding command (cmd=put P0-businesscard=description#lmfz640$port#39501$if-  
name#10.135.24.38$ P1-businesscard=description#lmfz640$port#52411$ifname#10.135.24.38$ P2-businesscard=de-  
scription#lmfz640$port#40759$ifname#10.135.24.38$ P3-businesscard=description#lmfz640$port#38407$if-  
name#10.135.24.38$ P4-businesscard=description#lmfz640$port#39411$ifname#10.135.24.38$ P5-businesscard=de-  
scription#lmfz640$port#52769$ifname#10.135.24.38$ P6-businesscard=description#lmfz640$port#46695$if-  
name#10.135.24.38$ P7-businesscard=description#lmfz640$port#54707$ifname#10.135.24.38$) upstream  
[mpiexec@lmfz640] [pgid: 0] got PMI command: cmd=put P0-businesscard=description#lmfz640$port#39501$if-  
name#10.135.24.38$ P1-businesscard=description#lmfz640$port#52411$ifname#10.135.24.38$ P2-businesscard=de-  
scription#lmfz640$port#40759$ifname#10.135.24.38$ P3-businesscard=description#lmfz640$port#38407$if-  
name#10.135.24.38$ P4-businesscard=description#lmfz640$port#39411$ifname#10.135.24.38$ P5-businesscard=de-  
scription#lmfz640$port#52769$ifname#10.135.24.38$ P6-businesscard=description#lmfz640$port#46695$if-  
name#10.135.24.38$ P7-businesscard=description#lmfz640$port#54707$ifname#10.135.24.38$  
[proxy:0:0@lmfz640] forwarding command (cmd=barrier_in) upstream  
[mpiexec@lmfz640] [pgid: 0] got PMI command: cmd=barrier_in  
[mpiexec@lmfz640] PMI response to fd 6 pid 29: cmd=keyval_cache P0-businesscard=descrip-  
tion#lmfz640$port#39501$ifname#10.135.24.38$ P1-businesscard=description#lmfz640$port#52411$if-  
name#10.135.24.38$ P2-businesscard=description#lmfz640$port#40759$ifname#10.135.24.38$ P3-businesscard=de-  
scription#lmfz640$port#38407$ifname#10.135.24.38$ P4-businesscard=description#lmfz640$port#39411$if-  
name#10.135.24.38$ P5-businesscard=description#lmfz640$port#52769$ifname#10.135.24.38$ P6-businesscard=de-  
scription#lmfz640$port#46695$ifname#10.135.24.38$ P7-businesscard=description#lmfz640$port#54707$if-  
name#10.135.24.38$  
[mpiexec@lmfz640] PMI response to fd 6 pid 29: cmd=barrier_out  
[proxy:0:0@lmfz640] PMI response: cmd=barrier_out  
PROCESS          3 OF           8 WORKING  
PROCESS          6 OF           8 WORKING  
PROCESS          0 OF           8 WORKING  
PROCESS          4 OF           8 WORKING  
PROCESS          2 OF           8 WORKING  
PROCESS          5 OF           8 WORKING  
PROCESS          7 OF           8 WORKING  
PROCESS          1 OF           8 WORKING
```

```

*****
*
*
*          CRYSTAL09
*      public : 2.0
*      December 10th, 2012 - parallel executable
*
*
*
*
*          MAIN AUTHORS
*
*
*      R. DOVESI(1,10), V.R. SAUNDERS(2), C. ROETTI(1,10), R. ORLANDO (1,3),
*      C.M. ZICOVICH-WILSON(1,4), F. PASCALE(5), B. CIVALLERI(1,10), K. DOLL(6),
*      N.M.HARRISON(2,7), I. J. BUSH(2), Ph. D'ARCO(8), M. LLUNELL(9)
*
*****

```

```

*
* (1) THEORETICAL CHEMISTRY GROUP - UNIVERSITA' DI TORINO - TORINO (ITALY)
*      http://www.crystal.unito.it
* (2) COMPUTATIONAL SCIENCE & ENGINEERING DEPARTMENT - STFC DARESBUY LABORATORY (UK)
*      http://www.cse.stfc.ac.uk/cm/CRYSTAL/
* (3) UNIVERSITA' DEL PIEMONTE ORIENTALE - ALESSANDRIA (ITALY)
* (4) UNIVERSIDAD AUTONOMA DEL ESTADO DE MORELOS - CUERNAVACA (MEXICO)
* (5) UNIVERSITE' HENRI POINCARÉ - NANCY (FRANCE)
* (6) MPI FUER FESTKOERPERFORSCHUNG - STUTTGART (GERMANY)
* (7) IMPERIAL COLLEGE - LONDON (UK)
* (8) UNIVERSITE' PIERRE ET MARIE CURIE - PARIS (FRANCE)
* (9) UNIVERSIDAD DE BARCELONA - BARCELONA (SPAIN)
* (10) NIS - NANOSTRUCTURED INTERFACES AND SURFACES - TORINO (ITALY)
*      http://www.crystal.unito.it

```

```

*****
EEEEEEEEEE STARTING DATE 11 10 2019 TIME 14:14:25.8
Ca3SiO5 Cm 81100 ICSD W G Mumme LDA i VWN PP

```

```

CRYSTAL CALCULATION
(INPUT ACCORDING TO THE INTERNATIONAL TABLES FOR X-RAY CRYSTALLOGRAPHY)
CRYSTAL FAMILY      : MONOCLINIC
CRYSTAL CLASS (GROTH - 1921) : MONOCLINIC DOMATIC

```

```

SPACE GROUP (NONCENTROSYMMETRIC) : C M

```

```

LATTICE PARAMETERS (ANGSTROMS AND DEGREES) - CONVENTIONAL CELL
      A           B           C           ALPHA           BETA           GAMMA
      12.23500     7.07300     9.29800     90.00000     116.31000     90.00000

```

```

NUMBER OF IRREDUCIBLE ATOMS IN THE CONVENTIONAL CELL: 27

```

```

INPUT COORDINATES

```

```

ATOM AT. N.      COORDINATES
1  20      2.785434612087E-01  1.246419190595E-17  3.006880006403E-01
2  20      1.531537006405E-02  2.585068888852E-01  3.338407517012E-01
3  20      1.531537006405E-02 -2.585068888852E-01  3.338407517012E-01
4  20      -2.413293694602E-01 -2.359161832691E-01 -2.038417046735E-02
5  20      -2.413293694602E-01  2.359161832691E-01 -2.038417046735E-02
6  20      -3.032353025404E-01 -1.112570498310E-17 -3.537485816856E-01
7  20      2.760504695417E-02  5.000000000000E-01  2.002234093501E-02
8  20      -1.864937213094E-02 -2.762003324293E-01 -3.065722468464E-01
9  20      -1.864937213094E-02  2.762003324293E-01 -3.065722468464E-01
10 14      -2.804944480822E-01 -5.000000000000E-01 -3.483602425146E-01
11 14      2.866911555732E-01  5.000000000000E-01  3.584634624474E-01
12 14      1.563117691256E-03  7.236497377012E-19  1.317167878642E-03
13  8      1.799435653619E-01 -4.321182612850E-18  4.596840795229E-01
14  8      3.146382415874E-01  3.135397453095E-01  2.746504196733E-01
15  8      3.146382415874E-01 -3.135397453095E-01  2.746504196733E-01
16  8      1.416369842747E-01  5.000000000000E-01  3.242115389560E-01
17  8      -1.202960000615E-01  5.000000000000E-01  1.158423931343E-01
18  8      -1.323967604115E-01  3.626286874279E-18 -4.442461060711E-01
19  8      -1.316127431580E-01 -5.000000000000E-01 -2.417309932451E-01
20  8      -3.379350013612E-01 -3.099994556439E-01 -3.067690551272E-01
21  8      -3.379350013612E-01  3.099994556439E-01 -3.067690551272E-01
22  8      4.801992063025E-01 -3.310750185887E-17  4.956578249650E-01
23  8      1.247353671791E-01  5.000000000000E-01 -1.435912966766E-01
24  8      2.507864841237E-03  1.841554408899E-19  1.768212209225E-01
25  8      -1.429906011707E-01  2.018186860997E-18 -1.219030917026E-01
26  8      7.001017431963E-02  1.873620964908E-01 -2.362955768687E-02
27  8      7.001017431963E-02 -1.873620964908E-01 -2.362955768687E-02

```

```

*****
<< INFORMATION >>: FROM NOW ON, ALL COORDINATES REFER TO THE PRIMITIVE CELL

```

```

*****
LATTICE PARAMETERS (ANGSTROMS AND DEGREES) - PRIMITIVE CELL
      A           B           C           ALPHA           BETA           GAMMA           VOLUME
      7.06616     7.06616     9.29800     67.43555     112.56445     119.93596     360.639613

```

```

INPUT LIST - ATOM N. 3 NOT IRREDUCIBLE

```

```

INPUT LIST - ATOM N. 5 NOT IRREDUCIBLE

```

```

INPUT LIST - ATOM N. 9 NOT IRREDUCIBLE

```



GEOMETRY FOR WAVE FUNCTION - DIMENSIONALITY OF THE SYSTEM 3  
 (NON PERIODIC DIRECTION: LATTICE PARAMETER FORMALLY SET TO 500)  
 \*\*\*\*\*  
 LATTICE PARAMETERS (ANGSTROMS AND DEGREES) - BOHR = 0.5291772083 ANGSTROM  
 PRIMITIVE CELL - CENTRING CODE 4/0 VOLUME= 360.639613 - DENSITY 3.147 g/cm<sup>3</sup>

| A          | B          | C          | ALPHA     | BETA       | GAMMA      |
|------------|------------|------------|-----------|------------|------------|
| 7.06616151 | 7.06616151 | 9.29800000 | 67.435546 | 112.564454 | 119.935962 |

\*\*\*\*\*

ATOMS IN THE ASYMMETRIC UNIT 21 - ATOMS IN THE UNIT CELL: 27

| ATOM       | X/A                 | Y/B                 | Z/C                 |
|------------|---------------------|---------------------|---------------------|
| *****      |                     |                     |                     |
| 1 T 20 CA  | 2.785434612087E-01  | -2.785434612087E-01 | 3.006880006403E-01  |
| 2 T 20 CA  | 2.738222589492E-01  | 2.431915188212E-01  | 3.338407517012E-01  |
| 3 F 20 CA  | -2.431915188211E-01 | -2.738222589493E-01 | 3.338407517012E-01  |
| 4 T 20 CA  | -4.772455527293E-01 | 5.413186191100E-03  | -2.038417046735E-02 |
| 5 F 20 CA  | -5.413186191100E-03 | 4.772455527293E-01  | -2.038417046735E-02 |
| 6 T 20 CA  | -3.032353025404E-01 | 3.032353025404E-01  | -3.537485816856E-01 |
| 7 T 20 CA  | -4.723949530458E-01 | 4.723949530458E-01  | 2.002234093501E-02  |
| 8 T 20 CA  | -2.948497045602E-01 | -2.575509602984E-01 | -3.065722468464E-01 |
| 9 F 20 CA  | 2.575509602984E-01  | 2.948497045602E-01  | -3.065722468464E-01 |
| 10 T 14 SI | 2.195055519178E-01  | -2.195055519178E-01 | -3.483602425146E-01 |
| 11 T 14 SI | -2.133088444268E-01 | 2.133088444268E-01  | 3.584634624474E-01  |
| 12 T 14 SI | 1.563117691256E-03  | -1.563117691256E-03 | 1.317167878642E-03  |
| 13 T 8 O   | 1.799435653619E-01  | -1.799435653619E-01 | 4.596840795229E-01  |
| 14 T 8 O   | -3.718220131031E-01 | -1.098496277900E-03 | 2.746504196733E-01  |
| 15 F 8 O   | 1.098496277900E-03  | 3.718220131031E-01  | 2.746504196733E-01  |
| 16 T 8 O   | -3.583630157253E-01 | 3.583630157253E-01  | 3.242115389560E-01  |
| 17 T 8 O   | 3.797039999385E-01  | -3.797039999385E-01 | 1.158423931343E-01  |
| 18 T 8 O   | -1.323967604115E-01 | 1.323967604115E-01  | -4.442461060711E-01 |
| 19 T 8 O   | 3.683872568420E-01  | -3.683872568420E-01 | -2.417309932451E-01 |
| 20 T 8 O   | 3.520655429949E-01  | 2.793554571730E-02  | -3.067690551272E-01 |
| 21 F 8 O   | -2.793554571730E-02 | -3.520655429949E-01 | -3.067690551272E-01 |
| 22 T 8 O   | 4.801992063025E-01  | -4.801992063025E-01 | 4.956578249650E-01  |
| 23 T 8 O   | -3.752646328209E-01 | 3.752646328209E-01  | -1.435912966766E-01 |
| 24 T 8 O   | 2.507864841237E-03  | -2.507864841237E-03 | 1.768212209225E-01  |
| 25 T 8 O   | -1.429906011707E-01 | 1.429906011707E-01  | -1.219030917026E-01 |
| 26 T 8 O   | 2.573722708104E-01  | 1.173519221712E-01  | -2.362955768687E-02 |
| 27 F 8 O   | -1.173519221712E-01 | -2.573722708104E-01 | -2.362955768687E-02 |

TRANSFORMATION MATRIX PRIMITIVE-CRYSTALLOGRAPHIC CELL  
 1.0000 1.0000 0.0000 -1.0000 1.0000 0.0000 0.0000 0.0000 1.0000

\*\*\*\*\*  
 CRYSTALLOGRAPHIC CELL (VOLUME= 721.27922538)  

| A           | B          | C          | ALPHA     | BETA       | GAMMA     |
|-------------|------------|------------|-----------|------------|-----------|
| 12.23500000 | 7.07300000 | 9.29800000 | 90.000000 | 116.310000 | 90.000000 |

COORDINATES IN THE CRYSTALLOGRAPHIC CELL

| ATOM       | X/A                 | Y/B                 | Z/C                 |
|------------|---------------------|---------------------|---------------------|
| *****      |                     |                     |                     |
| 1 T 20 CA  | 2.785434612087E-01  | -3.793449615605E-18 | 3.006880006403E-01  |
| 2 T 20 CA  | 1.531537006405E-02  | 2.585068888852E-01  | 3.338407517012E-01  |
| 3 F 20 CA  | 1.531537006405E-02  | -2.585068888852E-01 | 3.338407517012E-01  |
| 4 T 20 CA  | -2.413293694602E-01 | -2.359161832691E-01 | -2.038417046735E-02 |
| 5 F 20 CA  | -2.413293694602E-01 | 2.359161832691E-01  | -2.038417046735E-02 |
| 6 T 20 CA  | -3.032353025404E-01 | 7.075015762172E-18  | -3.537485816856E-01 |
| 7 T 20 CA  | 2.760504695417E-02  | 5.000000000000E-01  | 2.002234093501E-02  |
| 8 T 20 CA  | -1.864937213094E-02 | -2.762003324293E-01 | -3.065722468464E-01 |
| 9 F 20 CA  | 1.864937213094E-02  | 2.762003324293E-01  | -3.065722468464E-01 |
| 10 T 14 SI | -2.804944480822E-01 | -5.000000000000E-01 | -3.483602425146E-01 |
| 11 T 14 SI | 2.866911555732E-01  | -5.000000000000E-01 | 3.584634624474E-01  |
| 12 T 14 SI | 1.563117691256E-03  | -2.077396347165E-19 | 1.317167878642E-03  |
| 13 T 8 O   | 1.799435653619E-01  | -7.302045304812E-18 | 4.596840795229E-01  |
| 14 T 8 O   | 3.146382415874E-01  | 3.135397453095E-01  | 2.746504196733E-01  |
| 15 F 8 O   | 3.146382415874E-01  | -3.135397453095E-01 | 2.746504196733E-01  |
| 16 T 8 O   | 1.416369842747E-01  | 5.000000000000E-01  | 3.242115389560E-01  |
| 17 T 8 O   | -1.202960000615E-01 | 5.000000000000E-01  | 1.158423931343E-01  |
| 18 T 8 O   | -1.323967604115E-01 | 9.830355798328E-19  | -4.442461060711E-01 |
| 19 T 8 O   | -1.316127431580E-01 | -5.000000000000E-01 | -2.417309932451E-01 |
| 20 T 8 O   | 1.620649986388E-01  | 1.900005443561E-01  | -3.067690551272E-01 |
| 21 F 8 O   | 1.620649986388E-01  | -1.900005443561E-01 | -3.067690551272E-01 |
| 22 T 8 O   | 4.801992063025E-01  | 2.631541868425E-18  | 4.956578249650E-01  |
| 23 T 8 O   | -3.752646328209E-01 | -1.657743352210E-17 | -1.435912966766E-01 |
| 24 T 8 O   | 2.507864841237E-03  | -6.822595532689E-18 | 1.768212209225E-01  |
| 25 T 8 O   | -1.429906011707E-01 | -1.422163765940E-17 | -1.219030917026E-01 |
| 26 T 8 O   | 7.001017431963E-02  | 1.873620964908E-01  | -2.362955768687E-02 |
| 27 F 8 O   | 7.001017431963E-02  | -1.873620964908E-01 | -2.362955768687E-02 |

T = ATOM BELONGING TO THE ASYMMETRIC UNIT

```

****      2 SYMMOPS - TRANSLATORS IN FRACTIONAL UNITS
V INV      ROTATION MATRICES      TRANSLATOR
1 1 1.00 0.00 0.00 0.00 1.00 0.00 0.00 0.00 1.00 0.00 0.00 0.00
2 2 0.00 -1.00 -0.00 -1.00 0.00 0.00 0.00 0.00 1.00 0.00 0.00 0.00

```

```

DIRECT LATTICE VECTORS CARTESIAN COMPONENTS (ANGSTROM)
      X      Y      Z
0.611750000000E+01 0.353650000000E+01 0.000000000000E+00
-0.611750000000E+01 0.353650000000E+01 0.000000000000E+00
-0.412113069411E+01 0.569338296924E-15 0.833481168366E+01

```

```

CARTESIAN COORDINATES - PRIMITIVE CELL
*****
*      ATOM      X (ANGSTROM)      Y (ANGSTROM)      Z (ANGSTROM)
*****
1      20 CA      2.168804699100E+00 4.061950824945E-16 2.506177860873E+00
2      20 CA      -1.188417816046E+00 1.828419225085E+00 2.782499797761E+00
3      20 CA      -1.188417816046E+00 -1.828419225085E+00 2.782499797761E+00
4      20 CA      -2.868659004759E+00 -1.668635164262E+00 -1.698982221730E-01
5      20 CA      -2.868659004759E+00 1.668635164262E+00 -1.698982221730E-01
6      20 CA      -2.252239788600E+00 -4.364045033406E-16 -2.948427811711E+00
7      20 CA      2.552330656891E-01 -3.536500000000E+00 1.668824411593E-01
8      20 CA      1.035249228418E+00 -1.953564951272E+00 -2.555221944901E+00
9      20 CA      1.035249228418E+00 1.953564951272E+00 -2.555221944901E+00
10     14 SI      -1.996211484252E+00 -3.536500000000E+00 -2.903517019433E+00
11     14 SI      2.030391510630E+00 -3.536500000000E+00 2.987725454972E+00
12     14 SI      1.369652397855E-02 7.499141167885E-19 1.097834622425E-02
13      8 O      3.071913524881E-01 3.792166951108E-16 3.831380236800E+00
14      8 O      2.717728611156E+00 2.217666618574E+00 2.289159526815E+00
15      8 O      2.717728611156E+00 -2.217666618574E+00 2.289159526815E+00
16      8 O      3.968103780253E-01 -3.536500000000E+00 2.702242122868E+00
17      8 O      -1.949223202777E+00 -3.536500000000E+00 9.655245317589E-01
18      8 O      2.109218998330E-01 -3.704272655978E-16 -3.702707635302E+00
19      8 O      -6.140768965584E-01 -3.536500000000E+00 -2.014782306802E+00
20      8 O      3.247100627433E+00 1.343873850231E+00 -2.556862304860E+00
21      8 O      3.247100627433E+00 -1.343873850231E+00 -2.556862304860E+00
22      8 O      3.832566612873E+00 7.522007585316E-16 4.131214630616E+00
23      8 O      -3.999604282423E+00 -5.517558009121E-16 -1.196806417212E+00
24      8 O      -6.980196345809E-01 5.477228647047E-17 1.473771578064E+00
25      8 O      -1.247111432401E+00 -3.044059869243E-16 -1.016039312997E+00
26      8 O      9.539549782722E-01 1.325212108479E+00 -1.969479134882E-01
27      8 O      9.539549782722E-01 -1.325212108479E+00 -1.969479134882E-01

```

```

*****
LOCAL ATOMIC FUNCTIONS BASIS SET
*****
      ATOM X(AU) Y(AU) Z(AU) NO. TYPE EXPONENT S COEF P COEF D/F/G COEF
*****
1 CA 4.098 0.000 4.736
1 S
1.913E+05 2.204E-04 0.000E+00 0.000E+00
2.697E+04 1.925E-03 0.000E+00 0.000E+00
5.696E+03 1.109E-02 0.000E+00 0.000E+00
1.489E+03 4.995E-02 0.000E+00 0.000E+00
4.483E+02 1.701E-01 0.000E+00 0.000E+00
1.546E+02 3.685E-01 0.000E+00 0.000E+00
6.037E+01 4.034E-01 0.000E+00 0.000E+00
2.509E+01 1.452E-01 0.000E+00 0.000E+00
2- 5 SP
4.486E+02-5.750E-03 8.470E-03 0.000E+00
1.057E+02-7.670E-02 6.027E-02 0.000E+00
3.469E+01-1.122E-01 2.124E-01 0.000E+00
1.350E+01 2.537E-01 3.771E-01 0.000E+00
5.820E+00 6.880E-01 4.010E-01 0.000E+00
1.819E+00 3.490E-01 1.980E-01 0.000E+00
6- 9 SP
2.075E+01-2.000E-03-3.650E-02 0.000E+00
8.400E+00-1.255E-01-6.850E-02 0.000E+00
3.597E+00-6.960E-01 1.570E-01 0.000E+00
1.408E+00 1.029E+00 1.482E+00 0.000E+00
7.260E-01 9.440E-01 1.025E+00 0.000E+00
10- 13 SP
4.530E-01 1.000E+00 1.000E+00 0.000E+00
14- 17 SP
2.950E-01 1.000E+00 1.000E+00 0.000E+00
18- 22 D
3.191E+00 0.000E+00 0.000E+00 1.600E-01

```

|    |      |        |        |           |            |            |           |
|----|------|--------|--------|-----------|------------|------------|-----------|
|    |      |        |        | 8.683E-01 | 0.000E+00  | 0.000E+00  | 3.130E-01 |
|    | 23-  | 27     | D      |           |            |            |           |
|    |      |        |        | 2.891E-01 | 0.000E+00  | 0.000E+00  | 4.060E-01 |
| 2  | CA   | -2.246 | 3.455  | 5.258     |            |            |           |
| 3  | CA   | -2.246 | -3.455 | 5.258     |            |            |           |
| 4  | CA   | -5.421 | -3.153 | -0.321    |            |            |           |
| 5  | CA   | -5.421 | 3.153  | -0.321    |            |            |           |
| 6  | CA   | -4.256 | -0.000 | -5.572    |            |            |           |
| 7  | CA   | 0.482  | -6.683 | 0.315     |            |            |           |
| 8  | CA   | 1.956  | -3.692 | -4.829    |            |            |           |
| 9  | CA   | 1.956  | 3.692  | -4.829    |            |            |           |
| 10 | SI   | -3.772 | -6.683 | -5.487    |            |            |           |
|    |      |        |        | 244       | S          |            |           |
|    |      |        |        | 8.765E+04 | 2.370E-04  | 0.000E+00  | 0.000E+00 |
|    |      |        |        | 1.285E+04 | 1.920E-03  | 0.000E+00  | 0.000E+00 |
|    |      |        |        | 2.786E+03 | 1.090E-02  | 0.000E+00  | 0.000E+00 |
|    |      |        |        | 7.280E+02 | 4.960E-02  | 0.000E+00  | 0.000E+00 |
|    |      |        |        | 2.195E+02 | 1.668E-01  | 0.000E+00  | 0.000E+00 |
|    |      |        |        | 7.590E+01 | 3.630E-01  | 0.000E+00  | 0.000E+00 |
|    |      |        |        | 2.946E+01 | 4.051E-01  | 0.000E+00  | 0.000E+00 |
|    |      |        |        | 1.199E+01 | 1.504E-01  | 0.000E+00  | 0.000E+00 |
|    | 245- | 248    | SP     |           |            |            |           |
|    |      |        |        | 1.660E+02 | -8.840E-03 | 9.090E-03  | 0.000E+00 |
|    |      |        |        | 3.937E+01 | -8.590E-02 | 6.010E-02  | 0.000E+00 |
|    |      |        |        | 1.271E+01 | -7.120E-02 | 1.952E-01  | 0.000E+00 |
|    |      |        |        | 4.777E+00 | 4.147E-01  | 3.384E-01  | 0.000E+00 |
|    |      |        |        | 1.848E+00 | 6.168E-01  | 3.006E-01  | 0.000E+00 |
|    |      |        |        | 7.365E-01 | 1.154E-01  | 6.480E-02  | 0.000E+00 |
|    | 249- | 252    | SP     |           |            |            |           |
|    |      |        |        | 4.175E+00 | -1.990E-02 | -8.700E-03 | 0.000E+00 |
|    |      |        |        | 1.447E+00 | -1.864E-01 | -4.380E-03 | 0.000E+00 |
|    |      |        |        | 5.023E-01 | 9.670E-02  | 2.207E-01  | 0.000E+00 |
|    | 253- | 256    | SP     |           |            |            |           |
|    |      |        |        | 3.220E-01 | 1.000E+00  | 1.000E+00  | 0.000E+00 |
|    | 257- | 260    | SP     |           |            |            |           |
|    |      |        |        | 1.300E-01 | 1.000E+00  | 1.000E+00  | 0.000E+00 |
|    | 261- | 265    | D      |           |            |            |           |
|    |      |        |        | 6.000E-01 | 0.000E+00  | 0.000E+00  | 1.000E+00 |
| 11 | SI   | 3.837  | -6.683 | 5.646     |            |            |           |
| 12 | SI   | 0.026  | 0.000  | 0.021     |            |            |           |
| 13 | O    | 0.581  | 0.000  | 7.240     |            |            |           |
|    |      |        |        | 310       | S          |            |           |
|    |      |        |        | 8.020E+03 | 1.080E-03  | 0.000E+00  | 0.000E+00 |
|    |      |        |        | 1.338E+03 | 8.040E-03  | 0.000E+00  | 0.000E+00 |
|    |      |        |        | 2.554E+02 | 5.324E-02  | 0.000E+00  | 0.000E+00 |
|    |      |        |        | 6.922E+01 | 1.681E-01  | 0.000E+00  | 0.000E+00 |
|    |      |        |        | 2.390E+01 | 3.581E-01  | 0.000E+00  | 0.000E+00 |
|    |      |        |        | 9.264E+00 | 3.855E-01  | 0.000E+00  | 0.000E+00 |
|    |      |        |        | 3.851E+00 | 1.468E-01  | 0.000E+00  | 0.000E+00 |
|    |      |        |        | 1.212E+00 | 7.280E-02  | 0.000E+00  | 0.000E+00 |
|    | 311- | 314    | SP     |           |            |            |           |
|    |      |        |        | 4.943E+01 | -8.830E-03 | 9.580E-03  | 0.000E+00 |
|    |      |        |        | 1.047E+01 | -9.150E-02 | 6.960E-02  | 0.000E+00 |
|    |      |        |        | 3.235E+00 | -4.020E-02 | 2.065E-01  | 0.000E+00 |
|    |      |        |        | 1.217E+00 | 3.790E-01  | 3.470E-01  | 0.000E+00 |
|    | 315- | 318    | SP     |           |            |            |           |
|    |      |        |        | 4.860E-01 | 1.000E+00  | 1.000E+00  | 0.000E+00 |
|    | 319- | 322    | SP     |           |            |            |           |
|    |      |        |        | 1.925E-01 | 1.000E+00  | 1.000E+00  | 0.000E+00 |
|    | 323- | 327    | D      |           |            |            |           |
|    |      |        |        | 2.000E+00 | 0.000E+00  | 0.000E+00  | 1.000E+00 |
|    | 328- | 332    | D      |           |            |            |           |
|    |      |        |        | 5.000E-01 | 0.000E+00  | 0.000E+00  | 1.000E+00 |
| 14 | O    | 5.136  | 4.191  | 4.326     |            |            |           |
| 15 | O    | 5.136  | -4.191 | 4.326     |            |            |           |
| 16 | O    | 0.750  | -6.683 | 5.106     |            |            |           |
| 17 | O    | -3.683 | -6.683 | 1.825     |            |            |           |
| 18 | O    | 0.399  | -0.000 | -6.997    |            |            |           |
| 19 | O    | -1.160 | -6.683 | -3.807    |            |            |           |
| 20 | O    | 6.136  | 2.540  | -4.832    |            |            |           |
| 21 | O    | 6.136  | -2.540 | -4.832    |            |            |           |
| 22 | O    | 7.243  | 0.000  | 7.807     |            |            |           |
| 23 | O    | -7.558 | -0.000 | -2.262    |            |            |           |
| 24 | O    | -1.319 | 0.000  | 2.785     |            |            |           |
| 25 | O    | -2.357 | -0.000 | -1.920    |            |            |           |
| 26 | O    | 1.803  | 2.504  | -0.372    |            |            |           |
| 27 | O    | 1.803  | -2.504 | -0.372    |            |            |           |

INFORMATION \*\*\*\* READM2 \*\*\*\* FULL DIRECT SCF (MONO AND BIEL INT) SELECTED  
 INFORMATION \*\*\*\* TOLINTEG \*\*\*\* COULOMB AND EXCHANGE SERIES TOLERANCES MODIFIED



```

INFORMATION **** MAXCYCLE **** MAX NUMBER OF SCF CYCLES SET TO          800
INFORMATION **** LEVSHIFT **** LEVEL SHIFTER ACTIVE
INFORMATION **** TOLDEE **** SCF TOL ON TOTAL ENERGY SET TO          10
*****
N. OF ATOMS PER CELL          27 COULOMB OVERLAP TOL          (T1) 10** -6
NUMBER OF SHELLS              171 COULOMB PENETRATION TOL      (T2) 10** -6
NUMBER OF AO                  654 EXCHANGE OVERLAP TOL        (T3) 10** 20
N. OF ELECTRONS PER CELL     342 EXCHANGE PSEUDO OVP (F(G))    (T4) 10** 20
CORE ELECTRONS PER CELL      222 EXCHANGE PSEUDO OVP (P(G))    (T5) 10** 20
N. OF SYMMETRY OPERATORS      2 POLE ORDER IN MONO ZONE        4
*****
TYPE OF CALCULATION : RESTRICTED CLOSED SHELL
Kohn-Sham HAMILTONIAN

(EXCHANGE) [CORRELATION] FUNCTIONAL: (DIRAC-SLATER LDA) [VOSKO-WILK-NUSAIR]

EIGENVALUE LEVEL SHIFTING OF 0.600 HARTREE
LOCKING - FERMI ENERGY ALTERED BY LEVEL SHIFTER

CAPPA:IS1 4;IS2 4;IS3 4; K PTS MONK NET 24; SYMMOPS: K SPACE 4;G SPACE 2

*****
MAX NUMBER OF SCF CYCLES      800 CONVERGENCE ON DELTAP          10**-20
WEIGHT OF F(I) IN F(I+1)      75% CONVERGENCE ON ENERGY        10**-10
EIGENVALUE LEVEL SHIFTING OF 0.600 HARTREE
LOCKING - FERMI ENERGY ALTERED BY LEVEL SHIFTER
SHRINK. FACT.(MONKH.)          4 4 NUMBER OF K POINTS IN THE IBZ 24
SHRINKING FACTOR(GILAT NET)     4 NUMBER OF K POINTS(GILAT NET) 24
*****
*** K POINTS COORDINATES (OBLIQUE COORDINATES IN UNITS OF IS = 4)
  1-R( 0 0 0)  2-C( 1 0 0)  3-R( 2 0 0)  4-C( 1 1 0)
  5-C( 2 1 0)  6-C( 3 1 0)  7-R( 2 2 0)  8-C( 0 0 1)
  9-C( 1 0 1) 10-C( 2 0 1) 11-C( 3 0 1) 12-C( 1 1 1)
 13-C( 2 1 1) 14-C( 3 1 1) 15-C( 1 2 1) 16-C( 2 2 1)
 17-C( 1 3 1) 18-R( 0 0 2) 19-C( 1 0 2) 20-R( 2 0 2)
 21-C( 1 1 2) 22-C( 2 1 2) 23-C( 3 1 2) 24-R( 2 2 2)

DIRECT LATTICE VECTORS COMPON. (A.U.)    RECIP. LATTICE VECTORS COMPON. (A.U.)
      X          Y          Z          X          Y          Z
 11.5603996    6.6830165    0.0000000    0.2717547    0.4700860    0.1343685
-11.5603996    6.6830165    0.0000000   -0.2717547    0.4700860   -0.1343685
 -7.7878084    0.0000000   15.7505115    0.0000000    0.0000000    0.3989194

DISK SPACE FOR EIGENVECTORS (FTN 10) 17964072 REALS

SYMMETRY ADAPTION OF THE BLOCH FUNCTIONS ENABLED
TTTTTTTTTTTTTTTTTTTTTTTTTTTTTTT gordshl TELAPSE          0.02 TCPU          0.01

DIMENSIONS P(G)= 345586 F(G)= 173156 P(G),F(G) (IRR) 103599
MAX G-VECTOR INDEX FOR 1- AND 2-ELECTRON INTEGRALS 33

TTTTTTTTTTTTTTTTTTTTTTTTTTTTTTT INPUT          TELAPSE          0.03 TCPU          0.02

NEIGHBORS OF THE NON-EQUIVALENT ATOMS

N = NUMBER OF NEIGHBORS AT DISTANCE R
ATOM N      R/ANG      R/AU      NEIGHBORS (ATOM LABELS AND CELL INDICES)
 1 CA  1      2.2851      4.3182  13 O    0 0 0
 1 CA  2      2.2949      4.3367  14 O    0 0 0  15 O    0 0 0
 1 CA  1      2.3257      4.3949  22 O    0 0 0
 1 CA  1      2.5242      4.7700  17 O    1 0 0
 1 CA  1      3.0471      5.7581  24 O    0 0 0
 1 CA  2      3.2464      6.1348  26 O    0 0 0  27 O    0 0 0

 2 CA  1      2.3014      4.3490  24 O    0 0 0
 2 CA  1      2.3223      4.3885  15 O    0 1 0
 2 CA  1      2.3317      4.4063  16 O    1 1 0
 2 CA  1      2.4370      4.6052  22 O    0 1 0
 2 CA  1      2.5846      4.8842  13 O    0 0 0
 2 CA  1      2.6073      4.9270  17 O    1 1 0

 4 CA  1      2.2623      4.2751  23 O    0 0 0
 4 CA  1      2.3583      4.4566  26 O   -1 0 0
 4 CA  1      2.3714      4.4813  17 O    0 0 0
 4 CA  1      2.4438      4.6181  20 O   -1 0 0
 4 CA  1      2.4758      4.6786  25 O    0 0 0
 4 CA  1      2.5400      4.7998  14 O   -1 0 0

 6 CA  1      2.1782      4.1161  25 O    0 0 0

```

|       |   |        |        |       |        |      |        |
|-------|---|--------|--------|-------|--------|------|--------|
| 6 CA  | 2 | 2.3115 | 4.3681 | 20 O  | -1 0 0 | 21 O | 0 1 0  |
| 6 CA  | 1 | 2.3859 | 4.5087 | 22 O  | -1 1-1 |      |        |
| 6 CA  | 1 | 2.4742 | 4.6755 | 23 O  | 0 0 0  |      |        |
| 6 CA  | 1 | 2.5761 | 4.8681 | 18 O  | 0 0 0  |      |        |
| 6 CA  | 1 | 2.7624 | 5.2201 | 16 O  | 0 1-1  |      |        |
| 7 CA  | 1 | 2.3085 | 4.3624 | 23 O  | 0-1 0  |      |        |
| 7 CA  | 1 | 2.3447 | 4.4308 | 17 O  | 0 0 0  |      |        |
| 7 CA  | 2 | 2.3474 | 4.4360 | 26 O  | -1-1 0 | 27 O | 0 0 0  |
| 7 CA  | 1 | 2.3485 | 4.4380 | 19 O  | 0 0 0  |      |        |
| 7 CA  | 1 | 2.5393 | 4.7986 | 16 O  | 0 0 0  |      |        |
| 7 CA  | 2 | 3.2441 | 6.1304 | 8 CA  | 0 0 0  | 9 CA | -1-1 0 |
| 8 CA  | 1 | 2.2943 | 4.3357 | 21 O  | 0 0 0  |      |        |
| 8 CA  | 1 | 2.3490 | 4.4391 | 19 O  | 0 0 0  |      |        |
| 8 CA  | 1 | 2.3501 | 4.4411 | 23 O  | 0-1 0  |      |        |
| 8 CA  | 1 | 2.4109 | 4.5560 | 18 O  | 0 0 0  |      |        |
| 8 CA  | 1 | 2.4216 | 4.5762 | 22 O  | -1 0-1 |      |        |
| 8 CA  | 1 | 2.4419 | 4.6145 | 27 O  | 0 0 0  |      |        |
| 10 SI | 1 | 1.6291 | 3.0786 | 13 O  | -1 0-1 |      |        |
| 10 SI | 2 | 1.6402 | 3.0996 | 20 O  | -1 0 0 | 21 O | -1 0 0 |
| 10 SI | 1 | 1.6432 | 3.1052 | 19 O  | 0 0 0  |      |        |
| 10 SI | 2 | 3.4239 | 6.4701 | 4 CA  | 0 0 0  | 5 CA | -1-1 0 |
| 10 SI | 2 | 3.4310 | 6.4837 | 2 CA  | -1 0-1 | 3 CA | -1 0-1 |
| 10 SI | 2 | 3.4375 | 6.4960 | 8 CA  | 0 0 0  | 9 CA | -1-1 0 |
| 11 SI | 2 | 1.6431 | 3.1050 | 14 O  | -1-1 0 | 15 O | 0 0 0  |
| 11 SI | 1 | 1.6539 | 3.1254 | 18 O  | 0-1 1  |      |        |
| 11 SI | 1 | 1.6583 | 3.1338 | 16 O  | 0 0 0  |      |        |
| 11 SI | 1 | 3.3137 | 6.2620 | 6 CA  | 0-1 1  |      |        |
| 11 SI | 1 | 3.3329 | 6.2983 | 7 CA  | 0 0 0  |      |        |
| 11 SI | 2 | 3.4333 | 6.4880 | 2 CA  | 0-1 0  | 3 CA | 0-1 0  |
| 12 SI | 1 | 1.6262 | 3.0730 | 25 O  | 0 0 0  |      |        |
| 12 SI | 1 | 1.6267 | 3.0741 | 24 O  | 0 0 0  |      |        |
| 12 SI | 2 | 1.6381 | 3.0956 | 26 O  | 0 0 0  | 27 O | 0 0 0  |
| 12 SI | 1 | 3.2970 | 6.2305 | 1 CA  | 0 0 0  |      |        |
| 12 SI | 2 | 3.3354 | 6.3030 | 4 CA  | 0 0 0  | 5 CA | 0 0 0  |
| 12 SI | 2 | 3.3831 | 6.3931 | 8 CA  | 0 0 0  | 9 CA | 0 0 0  |
| 13 O  | 1 | 1.6291 | 3.0786 | 10 SI | 1 0 1  |      |        |
| 13 O  | 1 | 2.2851 | 4.3182 | 1 CA  | 0 0 0  |      |        |
| 13 O  | 1 | 2.5630 | 4.8433 | 24 O  | 0 0 0  |      |        |
| 13 O  | 2 | 2.5846 | 4.8842 | 2 CA  | 0 0 0  | 3 CA | 0 0 0  |
| 13 O  | 2 | 2.6439 | 4.9963 | 20 O  | 0 0 1  | 21 O | 0 0 1  |
| 13 O  | 1 | 2.7109 | 5.1229 | 19 O  | 1 0 1  |      |        |
| 14 O  | 1 | 1.6431 | 3.1050 | 11 SI | 1 1 0  |      |        |
| 14 O  | 1 | 2.2949 | 4.3367 | 1 CA  | 0 0 0  |      |        |
| 14 O  | 1 | 2.3223 | 4.3885 | 3 CA  | 1 0 0  |      |        |
| 14 O  | 1 | 2.5400 | 4.7998 | 4 CA  | 1 0 0  |      |        |
| 14 O  | 1 | 2.6377 | 4.9845 | 15 O  | 1 1 0  |      |        |
| 14 O  | 1 | 2.7012 | 5.1046 | 16 O  | 1 1 0  |      |        |
| 16 O  | 1 | 1.6583 | 3.1338 | 11 SI | 0 0 0  |      |        |
| 16 O  | 2 | 2.3317 | 4.4063 | 2 CA  | -1-1 0 | 3 CA | 0 0 0  |
| 16 O  | 1 | 2.5393 | 4.7986 | 7 CA  | 0 0 0  |      |        |
| 16 O  | 1 | 2.6462 | 5.0005 | 18 O  | 0-1 1  |      |        |
| 16 O  | 2 | 2.7012 | 5.1046 | 14 O  | -1-1 0 | 15 O | 0 0 0  |
| 16 O  | 1 | 2.7624 | 5.2201 | 6 CA  | 0-1 1  |      |        |
| 17 O  | 1 | 2.3447 | 4.4308 | 7 CA  | 0 0 0  |      |        |
| 17 O  | 2 | 2.3714 | 4.4813 | 4 CA  | 0 0 0  | 5 CA | -1-1 0 |
| 17 O  | 1 | 2.5242 | 4.7700 | 1 CA  | -1 0 0 |      |        |
| 17 O  | 2 | 2.6073 | 4.9270 | 2 CA  | -1-1 0 | 3 CA | 0 0 0  |
| 17 O  | 1 | 2.9189 | 5.5159 | 16 O  | 0 0 0  |      |        |
| 17 O  | 2 | 2.9621 | 5.5976 | 14 O  | -1 0 0 | 15 O | -1 0 0 |
| 18 O  | 1 | 1.6539 | 3.1254 | 11 SI | 0 1-1  |      |        |
| 18 O  | 2 | 2.4109 | 4.5560 | 8 CA  | 0 0 0  | 9 CA | 0 0 0  |
| 18 O  | 1 | 2.5761 | 4.8681 | 6 CA  | 0 0 0  |      |        |
| 18 O  | 1 | 2.6462 | 5.0005 | 16 O  | 0 1-1  |      |        |
| 18 O  | 2 | 2.7367 | 5.1715 | 14 O  | -1 0-1 | 15 O | 0 1-1  |
| 18 O  | 1 | 3.0568 | 5.7765 | 25 O  | 0 0 0  |      |        |
| 19 O  | 1 | 1.6432 | 3.1052 | 10 SI | 0 0 0  |      |        |
| 19 O  | 1 | 2.3485 | 4.4380 | 7 CA  | 0 0 0  |      |        |
| 19 O  | 2 | 2.3490 | 4.4391 | 8 CA  | 0 0 0  | 9 CA | -1-1 0 |

|      |   |        |        |       |        |      |        |
|------|---|--------|--------|-------|--------|------|--------|
| 19 O | 2 | 2.6816 | 5.0674 | 20 O  | -1 0 0 | 21 O | -1 0 0 |
| 19 O | 1 | 2.7109 | 5.1229 | 13 O  | -1 0-1 |      |        |
| 19 O | 1 | 2.8518 | 5.3891 | 23 O  | 0-1 0  |      |        |
|      |   |        |        |       |        |      |        |
| 20 O | 1 | 1.6402 | 3.0996 | 10 SI | 1 0 0  |      |        |
| 20 O | 1 | 2.2943 | 4.3357 | 9 CA  | 0 0 0  |      |        |
| 20 O | 1 | 2.3115 | 4.3681 | 6 CA  | 1 0 0  |      |        |
| 20 O | 1 | 2.4438 | 4.6181 | 4 CA  | 1 0 0  |      |        |
| 20 O | 1 | 2.6439 | 4.9963 | 13 O  | 0 0-1  |      |        |
| 20 O | 1 | 2.6816 | 5.0674 | 19 O  | 1 0 0  |      |        |
|      |   |        |        |       |        |      |        |
| 22 O | 1 | 2.3257 | 4.3949 | 1 CA  | 0 0 0  |      |        |
| 22 O | 1 | 2.3859 | 4.5087 | 6 CA  | 1-1 1  |      |        |
| 22 O | 2 | 2.4216 | 4.5762 | 8 CA  | 1 0 1  | 9 CA | 0-1 1  |
| 22 O | 2 | 2.4370 | 4.6052 | 2 CA  | 0-1 0  | 3 CA | 1 0 0  |
| 22 O | 1 | 3.0200 | 5.7069 | 23 O  | 1-1 1  |      |        |
| 22 O | 1 | 3.0387 | 5.7423 | 16 O  | 1 0 0  |      |        |
|      |   |        |        |       |        |      |        |
| 23 O | 2 | 2.2623 | 4.2751 | 4 CA  | 0 0 0  | 5 CA | 0 0 0  |
| 23 O | 1 | 2.3085 | 4.3624 | 7 CA  | 0 1 0  |      |        |
| 23 O | 2 | 2.3501 | 4.4411 | 8 CA  | 0 1 0  | 9 CA | -1 0 0 |
| 23 O | 1 | 2.4742 | 4.6755 | 6 CA  | 0 0 0  |      |        |
| 23 O | 2 | 2.6915 | 5.0862 | 26 O  | -1 0 0 | 27 O | 0 1 0  |
| 23 O | 1 | 2.7584 | 5.2127 | 25 O  | 0 0 0  |      |        |
|      |   |        |        |       |        |      |        |
| 24 O | 1 | 1.6267 | 3.0741 | 12 SI | 0 0 0  |      |        |
| 24 O | 2 | 2.3014 | 4.3490 | 2 CA  | 0 0 0  | 3 CA | 0 0 0  |
| 24 O | 1 | 2.5496 | 4.8181 | 25 O  | 0 0 0  |      |        |
| 24 O | 1 | 2.5630 | 4.8433 | 13 O  | 0 0 0  |      |        |
| 24 O | 2 | 2.6975 | 5.0975 | 26 O  | 0 0 0  | 27 O | 0 0 0  |
| 24 O | 1 | 3.0471 | 5.7581 | 1 CA  | 0 0 0  |      |        |
|      |   |        |        |       |        |      |        |
| 25 O | 1 | 1.6262 | 3.0730 | 12 SI | 0 0 0  |      |        |
| 25 O | 1 | 2.1782 | 4.1161 | 6 CA  | 0 0 0  |      |        |
| 25 O | 2 | 2.4758 | 4.6786 | 4 CA  | 0 0 0  | 5 CA | 0 0 0  |
| 25 O | 1 | 2.5496 | 4.8181 | 24 O  | 0 0 0  |      |        |
| 25 O | 2 | 2.6966 | 5.0959 | 26 O  | 0 0 0  | 27 O | 0 0 0  |
| 25 O | 1 | 2.7584 | 5.2127 | 23 O  | 0 0 0  |      |        |
|      |   |        |        |       |        |      |        |
| 26 O | 1 | 1.6381 | 3.0956 | 12 SI | 0 0 0  |      |        |
| 26 O | 1 | 2.3474 | 4.4360 | 7 CA  | 1 1 0  |      |        |
| 26 O | 1 | 2.3583 | 4.4566 | 4 CA  | 1 0 0  |      |        |
| 26 O | 1 | 2.4419 | 4.6145 | 9 CA  | 0 0 0  |      |        |
| 26 O | 1 | 2.6504 | 5.0086 | 27 O  | 0 0 0  |      |        |
| 26 O | 1 | 2.6915 | 5.0862 | 23 O  | 1 0 0  |      |        |

SYMMETRY ALLOWED INTERNAL DEGREE(S) OF FREEDOM: 46

|                                                 |         |           |      |
|-------------------------------------------------|---------|-----------|------|
| TTTTTTTTTTTTTTTTTTTTTTTTTTTTTTTTTTTT SYMM       | TELAPSE | 0.10 TCPU | 0.09 |
| TTTTTTTTTTTTTTTTTTTTTTTTTTTTTTTTTTTT INT_SCREEN | TELAPSE | 0.10 TCPU | 0.09 |

```

*****
*
*
*      FFFFF  RRRR  EEEE  EEE  U  U  EEEE  N  N  CCC  Y  Y
*      F      R  R  E  E  E  U  U  E  NN  N  C  Y  Y
*      FFF    RRRR  EEEE  E  E  U  U  EEEE  N  N  N  C  Y
*      F      R  R  E  E  EE  U  U  E  N  NN  C  Y
*      F      R  R  EEEE  EE  E  UUU  EEEE  N  N  CCC  Y
*
*
* CALCULATION OF PHONON FREQUENCIES AT THE GAMMA POINT.
*
* SYMMETRY IS EXPLOITED TO BUILD THE TOTAL HESSIAN MATRIX.
* (F. PASCALE PHD THESIS TURIN-PARIS 2002)
*
*****

```

```

*
* REFERENCES TO BE QUOTED WHEN USING THIS MODULE:
*
* F. Pascale, C.M. Zicovich-Wilson, F. Lopez, B. Civalleri
* R. Orlando, R. Dovesi
* The calculation of the vibration frequencies of crystalline
* compounds and its implementation in the CRYSTAL code
* J. Comput. Chem. 25 (2004) 888-897
*
* C.M. Zicovich-Wilson, F. Pascale, C. Roetti, V.R. Saunders,

```

```

* R. Orlando, R. Dovesi
* The calculation of the vibration frequencies of alpha-quartz:
* the effect of hamiltonian and basis set
* J. Comput. Chem. 25 (2004) 1873-1881
*****

```

# ATOMS ISOTOPIC MASS (AMU) FOR FREQUENCY CALCULATION

|      |         |       |         |       |         |       |         |
|------|---------|-------|---------|-------|---------|-------|---------|
| 1 CA | 39.9626 | 2 CA  | 39.9626 | 3 CA  | 39.9626 | 4 CA  | 39.9626 |
| 5 CA | 39.9626 | 6 CA  | 39.9626 | 7 CA  | 39.9626 | 8 CA  | 39.9626 |
| 9 CA | 39.9626 | 10 SI | 27.9769 | 11 SI | 27.9769 | 12 SI | 27.9769 |
| 13 O | 15.9949 | 14 O  | 15.9949 | 15 O  | 15.9949 | 16 O  | 15.9949 |
| 17 O | 15.9949 | 18 O  | 15.9949 | 19 O  | 15.9949 | 20 O  | 15.9949 |
| 21 O | 15.9949 | 22 O  | 15.9949 | 23 O  | 15.9949 | 24 O  | 15.9949 |
| 25 O | 15.9949 | 26 O  | 15.9949 | 27 O  | 15.9949 |       |         |

STEP SIZE 0.0030 ANGSTROM

INFORMATION CONCERNING THE SCF+GRADIENT CALCULATIONS REQUIRED FOR GENERATING FREQUENCIES. IN PRINCIPLE 3N+1 SCF + GRADIENT CALCULATIONS ARE REQUIRED; FOR EACH OF THEM THE REMAINING POINT SYMMETRY IS INDICATED. POINT SYMMETRY PERMITS TO GENERATE GRADIENTS FOR DISPLACEMENT B STARTING FROM THE GRADIENT GENERATED BY DISPLACEMENT A.

| N  | LABEL                | SYMBOL | DISPLACEMENT | SYM.                                  |
|----|----------------------|--------|--------------|---------------------------------------|
| 1  | EQUILIBRIUM GEOMETRY |        |              | 2                                     |
| 2  | 1                    | CA     | DX           | GENERATED BY TRANSLATIONAL INVARIANCE |
| 3  | 1                    | CA     | DY           | GENERATED BY TRANSLATIONAL INVARIANCE |
| 4  | 1                    | CA     | DZ           | GENERATED BY TRANSLATIONAL INVARIANCE |
| 5  | 2                    | CA     | DX           | 1                                     |
| 6  | 2                    | CA     | DY           | 1                                     |
| 7  | 2                    | CA     | DZ           | 1                                     |
| 8  | 4                    | CA     | DX           | 1                                     |
| 9  | 4                    | CA     | DY           | 1                                     |
| 10 | 4                    | CA     | DZ           | 1                                     |
| 11 | 6                    | CA     | DX           | 2                                     |
| 12 | 6                    | CA     | DY           | 1                                     |
| 13 | 6                    | CA     | DZ           | 2                                     |
| 14 | 7                    | CA     | DX           | 2                                     |
| 15 | 7                    | CA     | DY           | 1                                     |
| 16 | 7                    | CA     | DZ           | 2                                     |
| 17 | 8                    | CA     | DX           | 1                                     |
| 18 | 8                    | CA     | DY           | 1                                     |
| 19 | 8                    | CA     | DZ           | 1                                     |
| 20 | 10                   | SI     | DX           | 2                                     |
| 21 | 10                   | SI     | DY           | 1                                     |
| 22 | 10                   | SI     | DZ           | 2                                     |
| 23 | 11                   | SI     | DX           | 2                                     |
| 24 | 11                   | SI     | DY           | 1                                     |
| 25 | 11                   | SI     | DZ           | 2                                     |
| 26 | 12                   | SI     | DX           | 2                                     |
| 27 | 12                   | SI     | DY           | 1                                     |
| 28 | 12                   | SI     | DZ           | 2                                     |
| 29 | 13                   | O      | DX           | 2                                     |
| 30 | 13                   | O      | DY           | 1                                     |
| 31 | 13                   | O      | DZ           | 2                                     |
| 32 | 14                   | O      | DX           | 1                                     |
| 33 | 14                   | O      | DY           | 1                                     |
| 34 | 14                   | O      | DZ           | 1                                     |
| 35 | 16                   | O      | DX           | 2                                     |
| 36 | 16                   | O      | DY           | 1                                     |
| 37 | 16                   | O      | DZ           | 2                                     |
| 38 | 17                   | O      | DX           | 2                                     |
| 39 | 17                   | O      | DY           | 1                                     |
| 40 | 17                   | O      | DZ           | 2                                     |
| 41 | 18                   | O      | DX           | 2                                     |
| 42 | 18                   | O      | DY           | 1                                     |
| 43 | 18                   | O      | DZ           | 2                                     |
| 44 | 19                   | O      | DX           | 2                                     |
| 45 | 19                   | O      | DY           | 1                                     |
| 46 | 19                   | O      | DZ           | 2                                     |
| 47 | 20                   | O      | DX           | 1                                     |
| 48 | 20                   | O      | DY           | 1                                     |
| 49 | 20                   | O      | DZ           | 1                                     |

|    |    |   |    |   |
|----|----|---|----|---|
| 50 | 22 | O | DX | 2 |
| 51 | 22 | O | DY | 1 |
| 52 | 22 | O | DZ | 2 |
| 53 | 23 | O | DX | 2 |
| 54 | 23 | O | DY | 1 |
| 55 | 23 | O | DZ | 2 |
| 56 | 24 | O | DX | 2 |
| 57 | 24 | O | DY | 1 |
| 58 | 24 | O | DZ | 2 |
| 59 | 25 | O | DX | 2 |
| 60 | 25 | O | DY | 1 |
| 61 | 25 | O | DZ | 2 |
| 62 | 26 | O | DX | 1 |
| 63 | 26 | O | DY | 1 |
| 64 | 26 | O | DZ | 1 |

USE OF RESIDUAL SYMMETRY AFTER DISPLACEMENT

NUMERICAL GRADIENT COMPUTED WITH A SINGLE DISPLACEMENT (+dx) FOR EACH  
 CARTESIAN COORDINATE WITH RESPECT TO THE EQUILIBRIUM CONFIGURATION

dx= 0.003

|                                     |    |
|-------------------------------------|----|
| NUMBER OF IRREDUCIBLE ATOMS         | 21 |
| NUMBER OF SCF+GRADIENT CALCULATIONS | 61 |

| ATOM | SYMOP | ORDER |
|------|-------|-------|
| 1    | 2     | 2     |
| 2    | 1     | 1     |
| 4    | 1     | 1     |
| 6    | 2     | 2     |
| 7    | 2     | 2     |
| 8    | 1     | 1     |
| 10   | 2     | 2     |
| 11   | 2     | 2     |
| 12   | 2     | 2     |
| 13   | 2     | 2     |
| 14   | 1     | 1     |
| 16   | 2     | 2     |
| 17   | 2     | 2     |
| 18   | 2     | 2     |
| 19   | 2     | 2     |
| 20   | 1     | 1     |
| 22   | 2     | 2     |
| 23   | 2     | 2     |
| 24   | 2     | 2     |
| 25   | 2     | 2     |
| 26   | 1     | 1     |

ATOM : IRREDUCIBLE ATOM  
 SYMOP : NUMBER OF SYMMETRY OPERATORS THAT DOESN'T MOVE THE IRREDUCIBLE ATOM  
 ORDER : MAXIMUM ORDER AMONG THE OPERATORS OF THE IRREDUCIBLE ATOM

\*\*\*\*\*

|                                            |           |      |    |
|--------------------------------------------|-----------|------|----|
| GCALCO - MAX INDICES DIRECT LATTICE VECTOR | 16        | 16   | 12 |
| NO.OF VECTORS CREATED 6999 STARS 1811 RMAX | 159.70567 | BOHR |    |

CAPPA:IS1 4;IS2 4;IS3 4; K PTS MONK NET 24; SYMMOPS: K SPACE 4;G SPACE 2

|                                             |         |      |      |      |
|---------------------------------------------|---------|------|------|------|
| TTTTTTTTTTTTTTTTTTTTTTTTTTTTTTTTTTT gordsh1 | TELAPSE | 0.11 | TCPU | 0.10 |
|---------------------------------------------|---------|------|------|------|

DIMENSIONS P(G)= 345586 F(G)= 173156 P(G),F(G) (IRR) 103599  
 MAX G-VECTOR INDEX FOR 1- AND 2-ELECTRON INTEGRALS 33

|                                           |         |      |      |      |
|-------------------------------------------|---------|------|------|------|
| TTTTTTTTTTTTTTTTTTTTTTTTTTTTTTTTTTT INPUT | TELAPSE | 0.12 | TCPU | 0.11 |
|-------------------------------------------|---------|------|------|------|

SYMMETRY ALLOWED INTERNAL DEGREE(S) OF FREEDOM: 46  
 TTTTTTTTTTTTTTTTTTTTTTTTTTTTTTTTTTTT SYMM TELAPSE 0.18 TCPU 0.17  
 TTTTTTTTTTTTTTTTTTTTTTTTTTTTTTTTTTTT INT\_SCREEN TELAPSE 0.18 TCPU 0.17  
 INFORMATION \*\*\*\* EXCBUF \*\*\*\* EXCH. BIPO BUFFER: WORDS USED = 0

DFT PARAMETERS

|    | ATOM |    | ELECTRONS | NET CHARGE | R (ANGSTROM) |
|----|------|----|-----------|------------|--------------|
| 1  | 20   | CA | 20.0000   | 0.0000     | 1.97000000   |
| 10 | 14   | SI | 14.0000   | 0.0000     | 1.17000000   |
| 13 | 8    | O  | 8.0000    | 0.0000     | 0.74000000   |

|                                                |         |       |      |       |  |
|------------------------------------------------|---------|-------|------|-------|--|
| SIZE OF GRID=                                  | 286574  |       |      |       |  |
| TTTTTTTTTTTTTTTTTTTTTTTTTTTTTTTTTTT MAKE_GRID2 | TELAPSE | 17.46 | TCPU | 17.45 |  |

BECKE WEIGHT FUNCTION  
RADSAFE = 2.00  
TOLERANCES - DENSITY:10\*\*- 6; POTENTIAL:10\*\*- 9; GRID WGT:10\*\*-14

RADIAL INTEGRATION - INTERVALS (POINTS,UPPER LIMIT): 1( 75, 4.0\*R)

ANGULAR INTEGRATION - INTERVALS (ACCURACY LEVEL [N. POINTS] UPPER LIMIT):  
1( 4[ 86] 0.2) 2( 8[ 194] 0.5) 3( 12[ 350] 0.9) 4( 16[ 974] 3.5)  
5( 12[ 350]9999.0)

TTTTTTTTTTTTTTTTTTTTTTTTTTTTTTT INT\_CALC TELAPSE 17.51 TCPU 17.50

\*\*\*\*\*  
Ca3SiO5 Cm 81100 ICSD W G Mumme LDA i VWN PP  
CRYSTAL - SCF - TYPE OF CALCULATION : RESTRICTED CLOSED SHELL  
\*\*\*\*\*

CAPPA:IS1 4;IS2 4;IS3 4; K PTS MONK NET 24; SYMMOPS: K SPACE 4;G SPACE 2

TTTTTTTTTTTTTTTTTTTTTTTTTTTTTTT SDIK TELAPSE 17.74 TCPU 17.73

AAAAAAAAAAAAAAAAAAAAAAAAAAAAAAAAAAAAAAAAAAAAAAAAAAAAAAAAAAAAAAAAAAAA  
ATOMIC WAVEFUNCTION(S)

NUCLEAR CHARGE 20.0 SYMMETRY SPECIES S P  
N. ELECTRONS 20.0 NUMBER OF PRIMITIVE GTOS 21 13  
NUMBER OF CONTRACTED GTOS 5 4  
NUMBER OF CLOSED SHELLS 4 2  
OPEN SHELL OCCUPATION 0 0

ZNUC SCFIT TOTAL HF ENERGY KINETIC ENERGY VIRIAL THEOREM ACCURACY  
20.0 7 -6.759945013E+02 6.789840598E+02 -1.995597012E+00 3.2E-06

NUCLEAR CHARGE 14.0 SYMMETRY SPECIES S P  
N. ELECTRONS 14.0 NUMBER OF PRIMITIVE GTOS 19 11  
NUMBER OF CONTRACTED GTOS 5 4  
NUMBER OF CLOSED SHELLS 3 1  
OPEN SHELL OCCUPATION 0 2

ZNUC SCFIT TOTAL HF ENERGY KINETIC ENERGY VIRIAL THEOREM ACCURACY  
14.0 10 -2.888271346E+02 2.895266850E+02 -1.997583814E+00 2.8E-06

NUCLEAR CHARGE 8.0 SYMMETRY SPECIES S P  
N. ELECTRONS 8.0 NUMBER OF PRIMITIVE GTOS 14 6  
NUMBER OF CONTRACTED GTOS 4 3  
NUMBER OF CLOSED SHELLS 2 0  
OPEN SHELL OCCUPATION 0 4

ZNUC SCFIT TOTAL HF ENERGY KINETIC ENERGY VIRIAL THEOREM ACCURACY  
8.0 13 -7.480044816E+01 7.461868841E+01 -2.002435848E+00 2.7E-06

AAAAAAAAAAAAAAAAAAAAAAAAAAAAAAAAAAAAAAAAAAAAAAAAAAAAAAAAAAAAAAAAAAAA

TTTTTTTTTTTTTTTTTTTTTTTTTTTTTTT MOQGAD TELAPSE 18.25 TCPU 18.24  
TTTTTTTTTTTTTTTTTTTTTTTTTTTTTTT SHELLX TELAPSE 22.65 TCPU 22.64  
TTTTTTTTTTTTTTTTTTTTTTTTTTTTTTT MONMO3 TELAPSE 23.46 TCPU 23.45  
NUMERICALLY INTEGRATED DENSITY 342.0001584345  
TTTTTTTTTTTTTTTTTTTTTTTTTTTTTTT NUMDFT TELAPSE 24.18 TCPU 24.17  
CYC 0 ETOT(AU) -8.063283847514E+03 DETOT -8.06E+03 tst 0.00E+00 PX 1.00E+00  
TTTTTTTTTTTTTTTTTTTTTTTTTTTTTTT FDIK TELAPSE 40.82 TCPU 40.81  
INSULATING STATE - LEVEL SHIFTER 0.60 au  
TOP OF VALENCE BANDS - BAND 171; K 1; EIG -3.0283175E-01 AU  
BOTTOM OF VIRTUAL BANDS - BAND 172; K 1; EIG -4.3152521E-02 AU  
TTTTTTTTTTTTTTTTTTTTTTTTTTTTTTT PDIG TELAPSE 41.13 TCPU 41.12  
TTTTTTTTTTTTTTTTTTTTTTTTTTTTTTT MOQGAD TELAPSE 41.15 TCPU 41.14  
TTTTTTTTTTTTTTTTTTTTTTTTTTTTTTT SHELLX TELAPSE 46.56 TCPU 46.55  
TTTTTTTTTTTTTTTTTTTTTTTTTTTTTTT MONMO3 TELAPSE 47.37 TCPU 47.36  
NUMERICALLY INTEGRATED DENSITY 342.0002379957  
TTTTTTTTTTTTTTTTTTTTTTTTTTTTTTT NUMDFT TELAPSE 48.85 TCPU 48.84  
CYC 1 ETOT(AU) -8.067609818095E+03 DETOT -4.33E+00 tst 0.00E+00 PX 1.00E+00  
TTTTTTTTTTTTTTTTTTTTTTTTTTTTTTT FDIK TELAPSE 53.89 TCPU 53.88  
INSULATING STATE - LEVEL SHIFTER 0.60 au  
TOP OF VALENCE BANDS - BAND 171; K 1; EIG -7.6875578E-01 AU  
BOTTOM OF VIRTUAL BANDS - BAND 172; K 1; EIG 4.8307521E-03 AU  
TTTTTTTTTTTTTTTTTTTTTTTTTTTTTTT PDIG TELAPSE 54.20 TCPU 54.19  
TTTTTTTTTTTTTTTTTTTTTTTTTTTTTTT MOQGAD TELAPSE 54.22 TCPU 54.21  
TTTTTTTTTTTTTTTTTTTTTTTTTTTTTTT SHELLX TELAPSE 59.63 TCPU 59.62  
TTTTTTTTTTTTTTTTTTTTTTTTTTTTTTT MONMO3 TELAPSE 60.45 TCPU 60.44  
NUMERICALLY INTEGRATED DENSITY 342.0002456724

|                                               |                 |         |                |      |          |
|-----------------------------------------------|-----------------|---------|----------------|------|----------|
| TTTTTTTTTTTTTTTTTTTTTTTTTTTTTTTTTTTTTTTT      | NUMDFT          | TELAPSE | 61.90          | TCPU | 61.89    |
| CYC 2 ETOT(AU) -8.069243744910E+03            | DETOT -1.63E+00 | tst     | 2.70E-03       | PX   | 8.07E-02 |
| TTTTTTTTTTTTTTTTTTTTTTTTTTTTTTTTTTTTTTTT      | FDIK            | TELAPSE | 67.02          | TCPU | 67.01    |
| INSULATING STATE - LEVEL SHIFTER 0.60 au      |                 |         |                |      |          |
| TOP OF VALENCE BANDS - BAND                   | 171; K          | 1; EIG  | -7.1009670E-01 | AU   |          |
| BOTTOM OF VIRTUAL BANDS - BAND                | 172; K          | 1; EIG  | 2.9096249E-02  | AU   |          |
| TTTTTTTTTTTTTTTTTTTTTTTTTTTTTTTTTTTTTTTT      | PDIG            | TELAPSE | 67.33          | TCPU | 67.32    |
| TTTTTTTTTTTTTTTTTTTTTTTTTTTTTTTTTTTTTTTT      | MOQGAD          | TELAPSE | 67.35          | TCPU | 67.34    |
| TTTTTTTTTTTTTTTTTTTTTTTTTTTTTTTTTTTTTTTT      | SHELLX          | TELAPSE | 72.76          | TCPU | 72.75    |
| TTTTTTTTTTTTTTTTTTTTTTTTTTTTTTTTTTTTTTTT      | MONMO3          | TELAPSE | 73.58          | TCPU | 73.57    |
| NUMERICALLY INTEGRATED DENSITY 342.0002448806 |                 |         |                |      |          |
| TTTTTTTTTTTTTTTTTTTTTTTTTTTTTTTTTTTTTTTT      | NUMDFT          | TELAPSE | 75.03          | TCPU | 75.02    |
| CYC 3 ETOT(AU) -8.070080462805E+03            | DETOT -8.37E-01 | tst     | 2.16E-03       | PX   | 7.68E-02 |
| TTTTTTTTTTTTTTTTTTTTTTTTTTTTTTTTTTTTTTTT      | FDIK            | TELAPSE | 79.84          | TCPU | 79.83    |
| INSULATING STATE - LEVEL SHIFTER 0.60 au      |                 |         |                |      |          |
| TOP OF VALENCE BANDS - BAND                   | 171; K          | 1; EIG  | -7.0072549E-01 | AU   |          |
| BOTTOM OF VIRTUAL BANDS - BAND                | 172; K          | 1; EIG  | 3.8513570E-02  | AU   |          |
| TTTTTTTTTTTTTTTTTTTTTTTTTTTTTTTTTTTTTTTT      | PDIG            | TELAPSE | 80.14          | TCPU | 80.13    |
| TTTTTTTTTTTTTTTTTTTTTTTTTTTTTTTTTTTTTTTT      | MOQGAD          | TELAPSE | 80.17          | TCPU | 80.16    |
| TTTTTTTTTTTTTTTTTTTTTTTTTTTTTTTTTTTTTTTT      | SHELLX          | TELAPSE | 85.58          | TCPU | 85.57    |
| TTTTTTTTTTTTTTTTTTTTTTTTTTTTTTTTTTTTTTTT      | MONMO3          | TELAPSE | 86.39          | TCPU | 86.38    |
| NUMERICALLY INTEGRATED DENSITY 342.0002379188 |                 |         |                |      |          |
| TTTTTTTTTTTTTTTTTTTTTTTTTTTTTTTTTTTTTTTT      | NUMDFT          | TELAPSE | 87.83          | TCPU | 87.82    |
| CYC 4 ETOT(AU) -8.070267438742E+03            | DETOT -1.87E-01 | tst     | 1.44E-03       | PX   | 4.83E-02 |
| TTTTTTTTTTTTTTTTTTTTTTTTTTTTTTTTTTTTTTTT      | FDIK            | TELAPSE | 92.63          | TCPU | 92.62    |
| INSULATING STATE - LEVEL SHIFTER 0.60 au      |                 |         |                |      |          |
| TOP OF VALENCE BANDS - BAND                   | 171; K          | 1; EIG  | -7.1190527E-01 | AU   |          |
| BOTTOM OF VIRTUAL BANDS - BAND                | 172; K          | 1; EIG  | 4.0032143E-02  | AU   |          |
| TTTTTTTTTTTTTTTTTTTTTTTTTTTTTTTTTTTTTTTT      | PDIG            | TELAPSE | 92.94          | TCPU | 92.92    |
| TTTTTTTTTTTTTTTTTTTTTTTTTTTTTTTTTTTTTTTT      | MOQGAD          | TELAPSE | 92.96          | TCPU | 92.95    |
| TTTTTTTTTTTTTTTTTTTTTTTTTTTTTTTTTTTTTTTT      | SHELLX          | TELAPSE | 98.37          | TCPU | 98.36    |
| TTTTTTTTTTTTTTTTTTTTTTTTTTTTTTTTTTTTTTTT      | MONMO3          | TELAPSE | 99.17          | TCPU | 99.16    |
| NUMERICALLY INTEGRATED DENSITY 342.0002304859 |                 |         |                |      |          |
| TTTTTTTTTTTTTTTTTTTTTTTTTTTTTTTTTTTTTTTT      | NUMDFT          | TELAPSE | 100.62         | TCPU | 100.61   |
| CYC 5 ETOT(AU) -8.070286804014E+03            | DETOT -1.94E-02 | tst     | 5.70E-04       | PX   | 3.28E-02 |
| TTTTTTTTTTTTTTTTTTTTTTTTTTTTTTTTTTTTTTTT      | FDIK            | TELAPSE | 105.42         | TCPU | 105.41   |
| INSULATING STATE - LEVEL SHIFTER 0.60 au      |                 |         |                |      |          |
| TOP OF VALENCE BANDS - BAND                   | 171; K          | 1; EIG  | -7.2493114E-01 | AU   |          |
| BOTTOM OF VIRTUAL BANDS - BAND                | 172; K          | 1; EIG  | 3.8472720E-02  | AU   |          |
| TTTTTTTTTTTTTTTTTTTTTTTTTTTTTTTTTTTTTTTT      | PDIG            | TELAPSE | 105.73         | TCPU | 105.72   |
| TTTTTTTTTTTTTTTTTTTTTTTTTTTTTTTTTTTTTTTT      | MOQGAD          | TELAPSE | 105.75         | TCPU | 105.74   |
| TTTTTTTTTTTTTTTTTTTTTTTTTTTTTTTTTTTTTTTT      | SHELLX          | TELAPSE | 111.16         | TCPU | 111.15   |
| TTTTTTTTTTTTTTTTTTTTTTTTTTTTTTTTTTTTTTTT      | MONMO3          | TELAPSE | 111.97         | TCPU | 111.96   |
| NUMERICALLY INTEGRATED DENSITY 342.0002251622 |                 |         |                |      |          |
| TTTTTTTTTTTTTTTTTTTTTTTTTTTTTTTTTTTTTTTT      | NUMDFT          | TELAPSE | 113.42         | TCPU | 113.41   |
| CYC 6 ETOT(AU) -8.070299143102E+03            | DETOT -1.23E-02 | tst     | 1.08E-04       | PX   | 1.84E-02 |
| TTTTTTTTTTTTTTTTTTTTTTTTTTTTTTTTTTTTTTTT      | FDIK            | TELAPSE | 118.70         | TCPU | 118.69   |
| INSULATING STATE - LEVEL SHIFTER 0.60 au      |                 |         |                |      |          |
| TOP OF VALENCE BANDS - BAND                   | 171; K          | 1; EIG  | -7.3373051E-01 | AU   |          |
| BOTTOM OF VIRTUAL BANDS - BAND                | 172; K          | 1; EIG  | 3.6457535E-02  | AU   |          |
| TTTTTTTTTTTTTTTTTTTTTTTTTTTTTTTTTTTTTTTT      | PDIG            | TELAPSE | 119.00         | TCPU | 118.99   |
| TTTTTTTTTTTTTTTTTTTTTTTTTTTTTTTTTTTTTTTT      | MOQGAD          | TELAPSE | 119.03         | TCPU | 119.01   |
| TTTTTTTTTTTTTTTTTTTTTTTTTTTTTTTTTTTTTTTT      | SHELLX          | TELAPSE | 124.44         | TCPU | 124.42   |
| TTTTTTTTTTTTTTTTTTTTTTTTTTTTTTTTTTTTTTTT      | MONMO3          | TELAPSE | 125.24         | TCPU | 125.23   |
| NUMERICALLY INTEGRATED DENSITY 342.000222568  |                 |         |                |      |          |
| TTTTTTTTTTTTTTTTTTTTTTTTTTTTTTTTTTTTTTTT      | NUMDFT          | TELAPSE | 126.70         | TCPU | 126.68   |
| CYC 7 ETOT(AU) -8.070310637342E+03            | DETOT -1.15E-02 | tst     | 2.26E-05       | PX   | 1.01E-02 |
| TTTTTTTTTTTTTTTTTTTTTTTTTTTTTTTTTTTTTTTT      | FDIK            | TELAPSE | 131.64         | TCPU | 131.63   |
| INSULATING STATE - LEVEL SHIFTER 0.60 au      |                 |         |                |      |          |
| TOP OF VALENCE BANDS - BAND                   | 171; K          | 1; EIG  | -7.3739372E-01 | AU   |          |
| BOTTOM OF VIRTUAL BANDS - BAND                | 172; K          | 1; EIG  | 3.4991671E-02  | AU   |          |
| TTTTTTTTTTTTTTTTTTTTTTTTTTTTTTTTTTTTTTTT      | PDIG            | TELAPSE | 131.95         | TCPU | 131.93   |
| TTTTTTTTTTTTTTTTTTTTTTTTTTTTTTTTTTTTTTTT      | MOQGAD          | TELAPSE | 131.97         | TCPU | 131.96   |
| TTTTTTTTTTTTTTTTTTTTTTTTTTTTTTTTTTTTTTTT      | SHELLX          | TELAPSE | 137.38         | TCPU | 137.37   |
| TTTTTTTTTTTTTTTTTTTTTTTTTTTTTTTTTTTTTTTT      | MONMO3          | TELAPSE | 138.17         | TCPU | 138.16   |
| NUMERICALLY INTEGRATED DENSITY 342.0002210448 |                 |         |                |      |          |
| TTTTTTTTTTTTTTTTTTTTTTTTTTTTTTTTTTTTTTTT      | NUMDFT          | TELAPSE | 139.61         | TCPU | 139.60   |
| CYC 8 ETOT(AU) -8.070315478104E+03            | DETOT -4.84E-03 | tst     | 1.62E-05       | PX   | 6.75E-03 |
| TTTTTTTTTTTTTTTTTTTTTTTTTTTTTTTTTTTTTTTT      | FDIK            | TELAPSE | 144.58         | TCPU | 144.57   |
| INSULATING STATE - LEVEL SHIFTER 0.60 au      |                 |         |                |      |          |
| TOP OF VALENCE BANDS - BAND                   | 171; K          | 1; EIG  | -7.3762138E-01 | AU   |          |
| BOTTOM OF VIRTUAL BANDS - BAND                | 172; K          | 1; EIG  | 3.4188614E-02  | AU   |          |
| TTTTTTTTTTTTTTTTTTTTTTTTTTTTTTTTTTTTTTTT      | PDIG            | TELAPSE | 144.88         | TCPU | 144.87   |
| TTTTTTTTTTTTTTTTTTTTTTTTTTTTTTTTTTTTTTTT      | MOQGAD          | TELAPSE | 144.91         | TCPU | 144.89   |
| TTTTTTTTTTTTTTTTTTTTTTTTTTTTTTTTTTTTTTTT      | SHELLX          | TELAPSE | 150.31         | TCPU | 150.30   |
| TTTTTTTTTTTTTTTTTTTTTTTTTTTTTTTTTTTTTTTT      | MONMO3          | TELAPSE | 151.12         | TCPU | 151.11   |
| NUMERICALLY INTEGRATED DENSITY 342.0002207012 |                 |         |                |      |          |
| TTTTTTTTTTTTTTTTTTTTTTTTTTTTTTTTTTTTTTTT      | NUMDFT          | TELAPSE | 152.57         | TCPU | 152.56   |
| CYC 9 ETOT(AU) -8.070316543527E+03            | DETOT -1.07E-03 | tst     | 4.20E-06       | PX   | 3.12E-03 |

|                                               |        |           |                |          |             |
|-----------------------------------------------|--------|-----------|----------------|----------|-------------|
| TTTTTTTTTTTTTTTTTTTTTTTTTTTTTTTTTTTTTTTT      | FDIK   | TE LAPSE  | 157.39         | TCPU     | 157.37      |
| INSULATING STATE - LEVEL SHIFTER 0.60 au      |        |           |                |          |             |
| TOP OF VALENCE BANDS - BAND                   | 171; K | 1; EIG    | -7.3651128E-01 | AU       |             |
| BOTTOM OF VIRTUAL BANDS - BAND                | 172; K | 1; EIG    | 3.3843012E-02  | AU       |             |
| TTTTTTTTTTTTTTTTTTTTTTTTTTTTTTTTTTTTTTTT      | PDIG   | TE LAPSE  | 157.69         | TCPU     | 157.68      |
| TTTTTTTTTTTTTTTTTTTTTTTTTTTTTTTTTTTTTTTT      | MOQGAD | TE LAPSE  | 157.71         | TCPU     | 157.70      |
| TTTTTTTTTTTTTTTTTTTTTTTTTTTTTTTTTTTTTTTT      | SHELLX | TE LAPSE  | 163.12         | TCPU     | 163.11      |
| TTTTTTTTTTTTTTTTTTTTTTTTTTTTTTTTTTTTTTTT      | MONMO3 | TE LAPSE  | 163.92         | TCPU     | 163.91      |
| NUMERICALLY INTEGRATED DENSITY 342.0002206603 |        |           |                |          |             |
| TTTTTTTTTTTTTTTTTTTTTTTTTTTTTTTTTTTTTTTT      | NUMDFT | TE LAPSE  | 165.38         | TCPU     | 165.37      |
| CYC 10 ETOT(AU) -8.070316716856E+03           | DETOT  | -1.73E-04 | tst            | 1.90E-06 | PX 1.24E-03 |
| TTTTTTTTTTTTTTTTTTTTTTTTTTTTTTTTTTTTTTTT      | FDIK   | TE LAPSE  | 170.46         | TCPU     | 170.44      |
| INSULATING STATE - LEVEL SHIFTER 0.60 au      |        |           |                |          |             |
| TOP OF VALENCE BANDS - BAND                   | 171; K | 1; EIG    | -7.3541629E-01 | AU       |             |
| BOTTOM OF VIRTUAL BANDS - BAND                | 172; K | 1; EIG    | 3.3723262E-02  | AU       |             |
| TTTTTTTTTTTTTTTTTTTTTTTTTTTTTTTTTTTTTTTT      | PDIG   | TE LAPSE  | 170.76         | TCPU     | 170.75      |
| TTTTTTTTTTTTTTTTTTTTTTTTTTTTTTTTTTTTTTTT      | MOQGAD | TE LAPSE  | 170.78         | TCPU     | 170.77      |
| TTTTTTTTTTTTTTTTTTTTTTTTTTTTTTTTTTTTTTTT      | SHELLX | TE LAPSE  | 176.19         | TCPU     | 176.18      |
| TTTTTTTTTTTTTTTTTTTTTTTTTTTTTTTTTTTTTTTT      | MONMO3 | TE LAPSE  | 177.00         | TCPU     | 176.99      |
| NUMERICALLY INTEGRATED DENSITY 342.0002206307 |        |           |                |          |             |
| TTTTTTTTTTTTTTTTTTTTTTTTTTTTTTTTTTTTTTTT      | NUMDFT | TE LAPSE  | 178.45         | TCPU     | 178.43      |
| CYC 11 ETOT(AU) -8.070316810887E+03           | DETOT  | -9.40E-05 | tst            | 2.32E-06 | PX 1.45E-03 |
| TTTTTTTTTTTTTTTTTTTTTTTTTTTTTTTTTTTTTTTT      | FDIK   | TE LAPSE  | 183.33         | TCPU     | 183.32      |
| INSULATING STATE - LEVEL SHIFTER 0.60 au      |        |           |                |          |             |
| TOP OF VALENCE BANDS - BAND                   | 171; K | 1; EIG    | -7.3482168E-01 | AU       |             |
| BOTTOM OF VIRTUAL BANDS - BAND                | 172; K | 1; EIG    | 3.3677766E-02  | AU       |             |
| TTTTTTTTTTTTTTTTTTTTTTTTTTTTTTTTTTTTTTTT      | PDIG   | TE LAPSE  | 183.63         | TCPU     | 183.62      |
| TTTTTTTTTTTTTTTTTTTTTTTTTTTTTTTTTTTTTTTT      | MOQGAD | TE LAPSE  | 183.66         | TCPU     | 183.65      |
| TTTTTTTTTTTTTTTTTTTTTTTTTTTTTTTTTTTTTTTT      | SHELLX | TE LAPSE  | 189.07         | TCPU     | 189.06      |
| TTTTTTTTTTTTTTTTTTTTTTTTTTTTTTTTTTTTTTTT      | MONMO3 | TE LAPSE  | 189.88         | TCPU     | 189.87      |
| NUMERICALLY INTEGRATED DENSITY 342.0002205360 |        |           |                |          |             |
| TTTTTTTTTTTTTTTTTTTTTTTTTTTTTTTTTTTTTTTT      | NUMDFT | TE LAPSE  | 191.33         | TCPU     | 191.32      |
| CYC 12 ETOT(AU) -8.070316868770E+03           | DETOT  | -5.79E-05 | tst            | 1.90E-06 | PX 1.79E-03 |
| TTTTTTTTTTTTTTTTTTTTTTTTTTTTTTTTTTTTTTTT      | FDIK   | TE LAPSE  | 196.14         | TCPU     | 196.13      |
| INSULATING STATE - LEVEL SHIFTER 0.60 au      |        |           |                |          |             |
| TOP OF VALENCE BANDS - BAND                   | 171; K | 1; EIG    | -7.3468683E-01 | AU       |             |
| BOTTOM OF VIRTUAL BANDS - BAND                | 172; K | 1; EIG    | 3.3636864E-02  | AU       |             |
| TTTTTTTTTTTTTTTTTTTTTTTTTTTTTTTTTTTTTTTT      | PDIG   | TE LAPSE  | 196.44         | TCPU     | 196.43      |
| TTTTTTTTTTTTTTTTTTTTTTTTTTTTTTTTTTTTTTTT      | MOQGAD | TE LAPSE  | 196.47         | TCPU     | 196.46      |
| TTTTTTTTTTTTTTTTTTTTTTTTTTTTTTTTTTTTTTTT      | SHELLX | TE LAPSE  | 201.88         | TCPU     | 201.87      |
| TTTTTTTTTTTTTTTTTTTTTTTTTTTTTTTTTTTTTTTT      | MONMO3 | TE LAPSE  | 202.70         | TCPU     | 202.69      |
| NUMERICALLY INTEGRATED DENSITY 342.0002203934 |        |           |                |          |             |
| TTTTTTTTTTTTTTTTTTTTTTTTTTTTTTTTTTTTTTTT      | NUMDFT | TE LAPSE  | 204.15         | TCPU     | 204.14      |
| CYC 13 ETOT(AU) -8.070316891118E+03           | DETOT  | -2.23E-05 | tst            | 1.14E-06 | PX 1.56E-03 |
| TTTTTTTTTTTTTTTTTTTTTTTTTTTTTTTTTTTTTTTT      | FDIK   | TE LAPSE  | 209.00         | TCPU     | 208.99      |
| INSULATING STATE - LEVEL SHIFTER 0.60 au      |        |           |                |          |             |
| TOP OF VALENCE BANDS - BAND                   | 171; K | 1; EIG    | -7.3479854E-01 | AU       |             |
| BOTTOM OF VIRTUAL BANDS - BAND                | 172; K | 1; EIG    | 3.3583661E-02  | AU       |             |
| TTTTTTTTTTTTTTTTTTTTTTTTTTTTTTTTTTTTTTTT      | PDIG   | TE LAPSE  | 209.31         | TCPU     | 209.29      |
| TTTTTTTTTTTTTTTTTTTTTTTTTTTTTTTTTTTTTTTT      | MOQGAD | TE LAPSE  | 209.33         | TCPU     | 209.32      |
| TTTTTTTTTTTTTTTTTTTTTTTTTTTTTTTTTTTTTTTT      | SHELLX | TE LAPSE  | 214.74         | TCPU     | 214.73      |
| TTTTTTTTTTTTTTTTTTTTTTTTTTTTTTTTTTTTTTTT      | MONMO3 | TE LAPSE  | 215.55         | TCPU     | 215.53      |
| NUMERICALLY INTEGRATED DENSITY 342.0002202488 |        |           |                |          |             |
| TTTTTTTTTTTTTTTTTTTTTTTTTTTTTTTTTTTTTTTT      | NUMDFT | TE LAPSE  | 216.99         | TCPU     | 216.98      |
| CYC 14 ETOT(AU) -8.070316898820E+03           | DETOT  | -7.70E-06 | tst            | 5.44E-07 | PX 1.13E-03 |
| TTTTTTTTTTTTTTTTTTTTTTTTTTTTTTTTTTTTTTTT      | FDIK   | TE LAPSE  | 221.95         | TCPU     | 221.93      |
| INSULATING STATE - LEVEL SHIFTER 0.60 au      |        |           |                |          |             |
| TOP OF VALENCE BANDS - BAND                   | 171; K | 1; EIG    | -7.3497285E-01 | AU       |             |
| BOTTOM OF VIRTUAL BANDS - BAND                | 172; K | 1; EIG    | 3.3523251E-02  | AU       |             |
| TTTTTTTTTTTTTTTTTTTTTTTTTTTTTTTTTTTTTTTT      | PDIG   | TE LAPSE  | 222.25         | TCPU     | 222.24      |
| TTTTTTTTTTTTTTTTTTTTTTTTTTTTTTTTTTTTTTTT      | MOQGAD | TE LAPSE  | 222.28         | TCPU     | 222.26      |
| TTTTTTTTTTTTTTTTTTTTTTTTTTTTTTTTTTTTTTTT      | SHELLX | TE LAPSE  | 227.69         | TCPU     | 227.67      |
| TTTTTTTTTTTTTTTTTTTTTTTTTTTTTTTTTTTTTTTT      | MONMO3 | TE LAPSE  | 228.51         | TCPU     | 228.49      |
| NUMERICALLY INTEGRATED DENSITY 342.0002201318 |        |           |                |          |             |
| TTTTTTTTTTTTTTTTTTTTTTTTTTTTTTTTTTTTTTTT      | NUMDFT | TE LAPSE  | 229.96         | TCPU     | 229.95      |
| CYC 15 ETOT(AU) -8.070316902628E+03           | DETOT  | -3.81E-06 | tst            | 2.28E-07 | PX 7.17E-04 |
| TTTTTTTTTTTTTTTTTTTTTTTTTTTTTTTTTTTTTTTT      | FDIK   | TE LAPSE  | 235.00         | TCPU     | 234.98      |
| INSULATING STATE - LEVEL SHIFTER 0.60 au      |        |           |                |          |             |
| TOP OF VALENCE BANDS - BAND                   | 171; K | 1; EIG    |                |          |             |



```

TOP OF VALENCE BANDS - BAND 171; K 1; EIG -7.3519999E-01 AU
BOTTOM OF VIRTUAL BANDS - BAND 172; K 1; EIG 3.3413987E-02 AU
TTTTTTTTTTTTTTTTTTTTTTTTTTTTTTTT PDIG TELAPSE 248.31 TCPU 248.29
TTTTTTTTTTTTTTTTTTTTTTTTTTTTTTTT MOQGAD TELAPSE 248.33 TCPU 248.32
TTTTTTTTTTTTTTTTTTTTTTTTTTTTTTTT SHELLX TELAPSE 253.74 TCPU 253.73
TTTTTTTTTTTTTTTTTTTTTTTTTTTTTTTT MONMO3 TELAPSE 254.55 TCPU 254.53
NUMERICALLY INTEGRATED DENSITY 342.0002200038
TTTTTTTTTTTTTTTTTTTTTTTTTTTTTTTT NUMDFT TELAPSE 255.99 TCPU 255.98
CYC 17 ETOT(AU) -8.070316905342E+03 DETOT -7.48E-07 tst 4.99E-08 PX 2.59E-04
TTTTTTTTTTTTTTTTTTTTTTTTTTTTTTTT FDIK TELAPSE 260.95 TCPU 260.93
INSULATING STATE - LEVEL SHIFTER 0.60 au
TOP OF VALENCE BANDS - BAND 171; K 1; EIG -7.3524257E-01 AU
BOTTOM OF VIRTUAL BANDS - BAND 172; K 1; EIG 3.3372943E-02 AU
TTTTTTTTTTTTTTTTTTTTTTTTTTTTTTTT PDIG TELAPSE 261.25 TCPU 261.24
TTTTTTTTTTTTTTTTTTTTTTTTTTTTTTTT MOQGAD TELAPSE 261.28 TCPU 261.26
TTTTTTTTTTTTTTTTTTTTTTTTTTTTTTTT SHELLX TELAPSE 266.69 TCPU 266.67
TTTTTTTTTTTTTTTTTTTTTTTTTTTTTTTT MONMO3 TELAPSE 267.51 TCPU 267.50
NUMERICALLY INTEGRATED DENSITY 342.0002199769
TTTTTTTTTTTTTTTTTTTTTTTTTTTTTTTT NUMDFT TELAPSE 268.95 TCPU 268.94
CYC 18 ETOT(AU) -8.070316905529E+03 DETOT -1.87E-07 tst 2.87E-08 PX 1.72E-04
TTTTTTTTTTTTTTTTTTTTTTTTTTTTTTTT FDIK TELAPSE 273.86 TCPU 273.85
INSULATING STATE - LEVEL SHIFTER 0.60 au
TOP OF VALENCE BANDS - BAND 171; K 1; EIG -7.3526259E-01 AU
BOTTOM OF VIRTUAL BANDS - BAND 172; K 1; EIG 3.3340935E-02 AU
TTTTTTTTTTTTTTTTTTTTTTTTTTTTTTTT PDIG TELAPSE 274.17 TCPU 274.15
TTTTTTTTTTTTTTTTTTTTTTTTTTTTTTTT MOQGAD TELAPSE 274.19 TCPU 274.17
TTTTTTTTTTTTTTTTTTTTTTTTTTTTTTTT SHELLX TELAPSE 279.60 TCPU 279.58
TTTTTTTTTTTTTTTTTTTTTTTTTTTTTTTT MONMO3 TELAPSE 280.41 TCPU 280.39
NUMERICALLY INTEGRATED DENSITY 342.0002199617
TTTTTTTTTTTTTTTTTTTTTTTTTTTTTTTT NUMDFT TELAPSE 281.85 TCPU 281.83
CYC 19 ETOT(AU) -8.070316905560E+03 DETOT -3.04E-08 tst 1.74E-08 PX 1.27E-04
TTTTTTTTTTTTTTTTTTTTTTTTTTTTTTTT FDIK TELAPSE 286.77 TCPU 286.75
INSULATING STATE - LEVEL SHIFTER 0.60 au
TOP OF VALENCE BANDS - BAND 171; K 1; EIG -7.3527485E-01 AU
BOTTOM OF VIRTUAL BANDS - BAND 172; K 1; EIG 3.3316289E-02 AU
TTTTTTTTTTTTTTTTTTTTTTTTTTTTTTTT PDIG TELAPSE 287.07 TCPU 287.05
TTTTTTTTTTTTTTTTTTTTTTTTTTTTTTTT MOQGAD TELAPSE 287.10 TCPU 287.08
TTTTTTTTTTTTTTTTTTTTTTTTTTTTTTTT SHELLX TELAPSE 292.50 TCPU 292.49
TTTTTTTTTTTTTTTTTTTTTTTTTTTTTTTT MONMO3 TELAPSE 293.31 TCPU 293.29
NUMERICALLY INTEGRATED DENSITY 342.0002199520
TTTTTTTTTTTTTTTTTTTTTTTTTTTTTTTT NUMDFT TELAPSE 294.76 TCPU 294.74
CYC 20 ETOT(AU) -8.070316905560E+03 DETOT 1.09E-11 tst 1.06E-08 PX 1.01E-04
TTTTTTTTTTTTTTTTTTTTTTTTTTTTTTTT FDIK TELAPSE 299.66 TCPU 299.65
INSULATING STATE - LEVEL SHIFTER 0.60 au
TOP OF VALENCE BANDS - BAND 171; K 1; EIG -7.3528615E-01 AU
BOTTOM OF VIRTUAL BANDS - BAND 172; K 1; EIG 3.3297288E-02 AU
TTTTTTTTTTTTTTTTTTTTTTTTTTTTTTTT PDIG TELAPSE 299.96 TCPU 299.95
TTTTTTTTTTTTTTTTTTTTTTTTTTTTTTTT MOQGAD TELAPSE 299.99 TCPU 299.97
TTTTTTTTTTTTTTTTTTTTTTTTTTTTTTTT SHELLX TELAPSE 305.40 TCPU 305.38
::: PSEUDO TOTAL ENERGY -7.5790603503601E+03
::: VIRIAL COEFFICIENT 1.0312847845847E+00
TTTTTTTTTTTTTTTTTTTTTTTTTTTTTTTT MONMO3 TELAPSE 306.21 TCPU 306.20
NUMERICALLY INTEGRATED DENSITY 342.0002199448
TTTTTTTTTTTTTTTTTTTTTTTTTTTTTTTT NUMDFT TELAPSE 307.66 TCPU 307.64
CYC 21 ETOT(AU) -8.070316905547E+03 DETOT 1.25E-08 tst 6.42E-09 PX 1.01E-04

```

== SCF ENDED - CONVERGENCE ON ENERGY E(AU) -8.0703169055473E+03 CYCLES 21

ENERGY EXPRESSION=HARTREE+FOCK EXCH\*0.00000+(LDA EXCH)\*1.00000+VWN CORR

```

TOTAL ENERGY(DFT) (AU) ( 21) -8.0703169055473E+03 DE 1.2E-08 tester 6.4E-09
TTTTTTTTTTTTTTTTTTTTTTTTTTTTTTTT EDFT TELAPSE 307.66 TCPU 307.65

```

```

*****
*
* FORCE CALCULATION
*****

```

```

TTTTTTTTTTTTTTTTTTTTTTTTTTTTTTTT NUMDFG TELAPSE 377.72 TCPU 377.70
INFORMATION *** EXCPOG *** EXCH. BIPO BUFFER LENGTH (WORDS) = 0
WARNING *** GENPOG *** COULOMB BIPO BUFFER TOO SMALL - TO AVOID I/O SET BIPOSIZE = 1066200
INFORMATION *** GENPOG *** BIPO BUFFER LENGTH (WORDS) = 1000000
TTTTTTTTTTTTTTTTTTTTTTTTTTTTTTTT SHELXG TELAPSE 407.24 TCPU 407.22

```

CARTESIAN FORCES IN HARTREE/BOHR (ANALYTICAL)

| ATOM | X                   | Y                   | Z                  |
|------|---------------------|---------------------|--------------------|
| 1 20 | 6.757424268145E-06  | 6.877846226572E-15  | 4.689040031569E-05 |
| 2 20 | -1.155265695343E-04 | -1.348895275006E-04 | 2.366446816671E-04 |



|    |   |    |            |                     |    |             |   |
|----|---|----|------------|---------------------|----|-------------|---|
| 13 | O | DX | 4.5826E-04 | -8.070316905138E+03 | 18 | 4.0944E-07  | 2 |
| 13 | O | DY | 2.7064E-04 | -8.070316904601E+03 | 8  | 9.4600E-07  | 1 |
| 13 | O | DZ | 2.0966E-03 | -8.070316896971E+03 | 14 | 8.5765E-06  | 2 |
| 14 | O | DX | 7.0178E-04 | -8.070316903390E+03 | 18 | 2.1576E-06  | 1 |
| 14 | O | DY | 1.4914E-03 | -8.070316901079E+03 | 19 | 4.4686E-06  | 1 |
| 14 | O | DZ | 5.5767E-04 | -8.070316904664E+03 | 17 | 8.8284E-07  | 1 |
| 16 | O | DX | 1.8290E-03 | -8.070316901094E+03 | 17 | 4.4530E-06  | 2 |
| 16 | O | DY | 4.2920E-04 | -8.070316904127E+03 | 15 | 1.4207E-06  | 1 |
| 16 | O | DZ | 3.6763E-04 | -8.070316904500E+03 | 14 | 1.0474E-06  | 2 |
| 17 | O | DX | 4.2432E-04 | -8.070316904336E+03 | 16 | 1.2108E-06  | 2 |
| 17 | O | DY | 3.6624E-04 | -8.070316904307E+03 | 15 | 1.2405E-06  | 1 |
| 17 | O | DZ | 3.7288E-04 | -8.070316901925E+03 | 18 | 3.6224E-06  | 2 |
| 18 | O | DX | 3.6265E-04 | -8.070316905854E+03 | 10 | -3.0721E-07 | 2 |
| 18 | O | DY | 4.0592E-04 | -8.070316904257E+03 | 11 | 1.2899E-06  | 1 |
| 18 | O | DZ | 1.7205E-03 | -8.070316902536E+03 | 17 | 3.0113E-06  | 2 |
| 19 | O | DX | 1.5389E-03 | -8.070316901584E+03 | 18 | 3.9629E-06  | 2 |
| 19 | O | DY | 4.1461E-04 | -8.070316904170E+03 | 11 | 1.3773E-06  | 1 |
| 19 | O | DZ | 8.6372E-04 | -8.070316901965E+03 | 14 | 3.5821E-06  | 2 |
| 20 | O | DX | 9.3138E-04 | -8.070316902331E+03 | 16 | 3.1965E-06  | 1 |
| 20 | O | DY | 1.5388E-03 | -8.070316901563E+03 | 15 | 3.9843E-06  | 1 |
| 20 | O | DZ | 4.0989E-04 | -8.070316904664E+03 | 18 | 8.8351E-07  | 1 |
| 22 | O | DX | 4.4343E-04 | -8.070316902802E+03 | 16 | 2.7449E-06  | 2 |
| 22 | O | DY | 3.5988E-04 | -8.070316904331E+03 | 13 | 1.2160E-06  | 1 |
| 22 | O | DZ | 5.2961E-04 | -8.070316903430E+03 | 14 | 2.1175E-06  | 2 |
| 23 | O | DX | 6.3495E-04 | -8.070316903770E+03 | 19 | 1.7770E-06  | 2 |
| 23 | O | DY | 7.0988E-04 | -8.070316903335E+03 | 11 | 2.2126E-06  | 1 |
| 23 | O | DZ | 5.0273E-04 | -8.070316903343E+03 | 16 | 2.2039E-06  | 2 |
| 24 | O | DX | 6.8302E-04 | -8.070316902746E+03 | 16 | 2.8016E-06  | 2 |
| 24 | O | DY | 4.1232E-04 | -8.070316904178E+03 | 11 | 1.3691E-06  | 1 |
| 24 | O | DZ | 1.9200E-03 | -8.070316899229E+03 | 17 | 6.3187E-06  | 2 |
| 25 | O | DX | 1.4325E-03 | -8.070316901234E+03 | 16 | 4.3136E-06  | 2 |
| 25 | O | DY | 2.4577E-04 | -8.070316904658E+03 | 7  | 8.8975E-07  | 1 |
| 25 | O | DZ | 1.3495E-03 | -8.070316900945E+03 | 18 | 4.6022E-06  | 2 |
| 26 | O | DX | 9.2340E-04 | -8.070316904370E+03 | 16 | 1.1774E-06  | 1 |
| 26 | O | DY | 1.4855E-03 | -8.070316901645E+03 | 20 | 3.9023E-06  | 1 |
| 26 | O | DZ | 3.5501E-04 | -8.070316903771E+03 | 16 | 1.7764E-06  | 1 |

GCALCO - MAX INDICES DIRECT LATTICE VECTOR 16 16 12  
NO.OF VECTORS CREATED 6999 STARS 1811 RMAX 159.70567 BOHR

CAPPA:IS1 4;IS2 4;IS3 4; K PTS MONK NET 24; SYMMOPS: K SPACE 4;G SPACE 2

TTTTTTTTTTTTTTTTTTTTTTTTTTTTTTT gordshl TELAPSE 25568.18 TCPU 25565.29

DIMENSIONS P(G)= 345586 F(G)= 173156 P(G),F(G) (IRR) 103599  
MAX G-VECTOR INDEX FOR 1- AND 2-ELECTRON INTEGRALS 33

TTTTTTTTTTTTTTTTTTTTTTTTTTTTTTT INPUT TELAPSE 25568.18 TCPU 25565.29

SYMMETRY ALLOWED INTERNAL DEGREE(S) OF FREEDOM: 46  
TTTTTTTTTTTTTTTTTTTTTTTTTTTTTTT SYMM TELAPSE 25568.21 TCPU 25565.32  
TTTTTTTTTTTTTTTTTTTTTTTTTTTTTTT INT\_SCREEN TELAPSE 25568.22 TCPU 25565.33

+++ SYMMETRY ADAPTION OF VIBRATIONAL MODES +++

SYMMETRY INFORMATION:  
K-LITTLE GROUP: CLASS TABLE, CHARACTER TABLE.  
IRREP-(DIMENSION, NO. IRREDUCIBLE SETS)  
[WARNINGS: (1) ONLY ACTIVE IRREPS ARE GENERATED AND LISTED.  
(2) ONLY RELEVANT CLASSES ARE CONSIDERED IN THE CHARACTER TABLE  
(3) SYMBOLS MAY NOT FULLY COINCIDE WITH THOSE FROM TEXT BOOKS.  
IN CLASSES WRITTEN AS CX.Y OR SX.Y, X.Y IS A DECIMAL NUMBER THAT  
APPROACHES THE OPERATION FRACTIONAL ORDER.]

(P, D, RP, RD, STAND FOR PAIRING, DOUBLING, REAL PAIRING AND REAL DOUBLING  
OF THE IRREPS (SEE MANUAL))

K[ 1] ( 0 0 0)

CLASS | GROUP OPERATORS (SEE SYMMOPS KEYWORD)

-----

SGH | 2;

IRREP/CLA E SGH

-----

A' | 1.00 1.00  
B" | 1.00 -1.00

A' -(1, 48); B" -(1, 33);



|     |    |            |          |         |       |     |       |   |
|-----|----|------------|----------|---------|-------|-----|-------|---|
| 64- | 64 | 0.5368E-05 | 508.4763 | 15.2437 | (A' ) | A ( | 0.00) | A |
| 65- | 65 | 0.5779E-05 | 527.6282 | 15.8179 | (B" ) | A ( | 0.00) | A |
| 66- | 66 | 0.5827E-05 | 529.8052 | 15.8832 | (A' ) | A ( | 0.00) | A |
| 67- | 67 | 0.5869E-05 | 531.6882 | 15.9396 | (A' ) | A ( | 0.00) | A |
| 68- | 68 | 0.5921E-05 | 534.0607 | 16.0107 | (B" ) | A ( | 0.00) | A |
| 69- | 69 | 0.6180E-05 | 545.5958 | 16.3566 | (A' ) | A ( | 0.00) | A |
| 70- | 70 | 0.1399E-04 | 821.0347 | 24.6140 | (A' ) | A ( | 0.00) | A |
| 71- | 71 | 0.1521E-04 | 855.8369 | 25.6573 | (A' ) | A ( | 0.00) | A |
| 72- | 72 | 0.1552E-04 | 864.7241 | 25.9238 | (A' ) | A ( | 0.00) | A |
| 73- | 73 | 0.1580E-04 | 872.2873 | 26.1505 | (A' ) | A ( | 0.00) | A |
| 74- | 74 | 0.1652E-04 | 892.1374 | 26.7456 | (B" ) | A ( | 0.00) | A |
| 75- | 75 | 0.1707E-04 | 906.8861 | 27.1878 | (A' ) | A ( | 0.00) | A |
| 76- | 76 | 0.1718E-04 | 909.6901 | 27.2718 | (A' ) | A ( | 0.00) | A |
| 77- | 77 | 0.1739E-04 | 915.1337 | 27.4350 | (B" ) | A ( | 0.00) | A |
| 78- | 78 | 0.1792E-04 | 929.0265 | 27.8515 | (A' ) | A ( | 0.00) | A |
| 79- | 79 | 0.1797E-04 | 930.2760 | 27.8890 | (B" ) | A ( | 0.00) | A |
| 80- | 80 | 0.1980E-04 | 976.6831 | 29.2802 | (A' ) | A ( | 0.00) | A |
| 81- | 81 | 0.2023E-04 | 987.0618 | 29.5914 | (A' ) | A ( | 0.00) | A |

NORMAL MODES NORMALIZED TO CLASSICAL AMPLITUDES

| FREQ (CM**-1) |      | -81.72  | -50.56  | -0.96   | 14.43   | 50.87   | 50.93   |
|---------------|------|---------|---------|---------|---------|---------|---------|
| AT. 1         | CA X | 0.0000  | 0.0407  | 0.0000  | -0.0850 | 0.0351  | 0.0000  |
|               | Y    | 0.0082  | 0.0000  | 0.4313  | 0.0000  | 0.0000  | 0.0205  |
|               | Z    | 0.0000  | 0.0482  | 0.0000  | 0.0567  | 0.0253  | 0.0000  |
| AT. 2         | CA X | -0.0015 | 0.0528  | -0.0010 | -0.0781 | -0.0010 | -0.0212 |
|               | Y    | 0.0057  | -0.0041 | 0.4313  | 0.0013  | -0.0093 | -0.0161 |
|               | Z    | 0.0408  | 0.0389  | -0.0015 | 0.0847  | 0.0147  | 0.0305  |
| AT. 3         | CA X | 0.0015  | 0.0528  | 0.0010  | -0.0781 | -0.0010 | 0.0212  |
|               | Y    | 0.0057  | 0.0041  | 0.4313  | -0.0013 | 0.0093  | -0.0161 |
|               | Z    | -0.0408 | 0.0389  | 0.0015  | 0.0847  | 0.0147  | -0.0305 |
| AT. 4         | CA X | -0.0079 | 0.0193  | 0.0008  | -0.0753 | 0.0557  | 0.0571  |
|               | Y    | -0.0293 | -0.0075 | 0.4273  | -0.0003 | 0.0196  | 0.0392  |
|               | Z    | -0.0391 | 0.0296  | -0.0012 | 0.0782  | 0.0303  | 0.0024  |
| AT. 5         | CA X | 0.0079  | 0.0193  | -0.0008 | -0.0753 | 0.0557  | -0.0571 |
|               | Y    | -0.0293 | 0.0075  | 0.4273  | 0.0003  | -0.0196 | 0.0392  |
|               | Z    | 0.0391  | 0.0296  | 0.0012  | 0.0782  | 0.0303  | -0.0024 |
| AT. 6         | CA X | 0.0000  | 0.0415  | 0.0000  | -0.0750 | 0.0202  | 0.0000  |
|               | Y    | 0.0311  | 0.0000  | 0.4287  | 0.0000  | 0.0000  | 0.0527  |
|               | Z    | 0.0000  | 0.0550  | 0.0000  | 0.0828  | -0.0255 | 0.0000  |
| AT. 7         | CA X | 0.0000  | 0.0257  | 0.0000  | -0.0745 | 0.0340  | 0.0000  |
|               | Y    | -0.0209 | 0.0000  | 0.4283  | 0.0000  | 0.0000  | -0.0628 |
|               | Z    | 0.0000  | 0.0226  | 0.0000  | 0.0828  | 0.0392  | 0.0000  |
| AT. 8         | CA X | 0.0030  | 0.0355  | 0.0003  | -0.0766 | 0.0185  | -0.0327 |
|               | Y    | 0.0223  | -0.0040 | 0.4304  | -0.0022 | 0.0120  | -0.0217 |
|               | Z    | 0.0262  | 0.0250  | 0.0007  | 0.0777  | 0.0447  | -0.0138 |
| AT. 9         | CA X | -0.0030 | 0.0355  | -0.0003 | -0.0766 | 0.0185  | 0.0327  |
|               | Y    | 0.0223  | 0.0040  | 0.4304  | 0.0022  | -0.0120 | -0.0217 |
|               | Z    | -0.0262 | 0.0250  | -0.0007 | 0.0777  | 0.0447  | 0.0138  |
| AT. 10        | SI X | 0.0000  | 0.0363  | 0.0000  | -0.0739 | 0.0121  | 0.0000  |
|               | Y    | -0.0095 | 0.0000  | 0.4282  | 0.0000  | 0.0000  | -0.0171 |
|               | Z    | 0.0000  | 0.0471  | 0.0000  | 0.0826  | -0.0047 | 0.0000  |
| AT. 11        | SI X | 0.0000  | 0.0368  | 0.0000  | -0.0769 | 0.0145  | 0.0000  |
|               | Y    | 0.0020  | 0.0000  | 0.4304  | 0.0000  | 0.0000  | 0.0013  |
|               | Z    | 0.0000  | 0.0329  | 0.0000  | 0.0807  | 0.0257  | 0.0000  |
| AT. 12        | SI X | 0.0000  | 0.0456  | 0.0000  | -0.0734 | 0.0109  | 0.0000  |
|               | Y    | -0.0089 | 0.0000  | 0.4277  | 0.0000  | 0.0000  | 0.0114  |
|               | Z    | 0.0000  | 0.0292  | 0.0000  | 0.0819  | 0.0176  | 0.0000  |
| AT. 13        | O X  | 0.0000  | 0.0491  | 0.0000  | -0.0671 | -0.0328 | 0.0000  |
|               | Y    | -0.1113 | 0.0000  | 0.4302  | 0.0000  | 0.0000  | -0.0818 |
|               | Z    | 0.0000  | 0.0487  | 0.0000  | 0.0837  | -0.0265 | 0.0000  |
| AT. 14        | O X  | -0.0086 | 0.0550  | 0.0015  | -0.0751 | -0.0026 | 0.0267  |
|               | Y    | 0.0146  | 0.0016  | 0.4311  | 0.0009  | -0.0043 | 0.0099  |
|               | Z    | -0.0355 | 0.0412  | -0.0028 | 0.0800  | 0.0182  | 0.0139  |
| AT. 15        | O X  | 0.0086  | 0.0550  | -0.0015 | -0.0751 | -0.0026 | -0.0267 |
|               | Y    | 0.0146  | -0.0016 | 0.4311  | -0.0009 | 0.0043  | 0.0099  |
|               | Z    | 0.0355  | 0.0412  | 0.0028  | 0.0800  | 0.0182  | -0.0139 |
| AT. 16        | O X  | 0.0000  | 0.0413  | 0.0000  | -0.0762 | 0.0044  | 0.0000  |
|               | Y    | -0.0033 | 0.0000  | 0.4309  | 0.0000  | 0.0000  | -0.0405 |
|               | Z    | 0.0000  | 0.0044  | 0.0000  | 0.0806  | 0.0604  | 0.0000  |
| AT. 17        | O X  | 0.0000  | 0.0288  | 0.0000  | -0.0769 | 0.0337  | 0.0000  |
|               | Y    | 0.0050  | 0.0000  | 0.4271  | 0.0000  | 0.0000  | 0.0106  |
|               | Z    | 0.0000  | 0.0294  | 0.0000  | 0.0793  | 0.0219  | 0.0000  |
| AT. 18        | O X  | 0.0000  | 0.0096  | 0.0000  | -0.0775 | 0.0506  | 0.0000  |
|               | Y    | -0.0109 | 0.0000  | 0.4285  | 0.0000  | 0.0000  | 0.0126  |
|               | Z    | 0.0000  | 0.0432  | 0.0000  | 0.0824  | 0.0192  | 0.0000  |
| AT. 19        | O X  | 0.0000  | 0.0373  | 0.0000  | -0.0772 | 0.0225  | 0.0000  |
|               | Y    | 0.0311  | 0.0000  | 0.4299  | 0.0000  | 0.0000  | -0.0572 |

|               |    |    |         |         |         |         |         |         |
|---------------|----|----|---------|---------|---------|---------|---------|---------|
|               |    | Z  | 0.0000  | 0.0452  | 0.0000  | 0.0876  | -0.0116 | 0.0000  |
| AT.           | 20 | O  | X       | -0.0001 | 0.0354  | -0.0019 | -0.0758 | 0.0193  |
|               |    | Y  | 0.0184  | 0.0030  | 0.4282  | 0.0002  | 0.0012  | 0.0405  |
|               |    | Z  | -0.0948 | 0.0382  | 0.0010  | 0.0793  | 0.0127  | -0.0359 |
| AT.           | 21 | O  | X       | 0.0001  | 0.0354  | 0.0019  | -0.0758 | 0.0193  |
|               |    | Y  | 0.0184  | -0.0030 | 0.4282  | -0.0002 | -0.0012 | 0.0405  |
|               |    | Z  | 0.0948  | 0.0382  | -0.0010 | 0.0793  | 0.0127  | 0.0359  |
| AT.           | 22 | O  | X       | 0.0000  | 0.0486  | 0.0000  | -0.0769 | -0.0024 |
|               |    | Y  | 0.0519  | 0.0000  | 0.4305  | 0.0000  | 0.0000  | -0.0014 |
|               |    | Z  | 0.0000  | 0.0371  | 0.0000  | 0.0786  | 0.0240  | 0.0000  |
| AT.           | 23 | O  | X       | 0.0000  | 0.0301  | 0.0000  | -0.0756 | 0.0315  |
|               |    | Y  | -0.0053 | 0.0000  | 0.4291  | 0.0000  | 0.0000  | -0.0103 |
|               |    | Z  | 0.0000  | 0.0295  | 0.0000  | 0.0798  | 0.0391  | 0.0000  |
| AT.           | 24 | O  | X       | 0.0000  | 0.1396  | 0.0000  | -0.0610 | -0.1836 |
|               |    | Y  | 0.0771  | 0.0000  | 0.4295  | 0.0000  | 0.0000  | 0.0145  |
|               |    | Z  | 0.0000  | 0.0754  | 0.0000  | 0.0885  | -0.0667 | 0.0000  |
| AT.           | 25 | O  | X       | 0.0000  | -0.0147 | 0.0000  | -0.0796 | 0.1054  |
|               |    | Y  | -0.0801 | 0.0000  | 0.4288  | 0.0000  | 0.0000  | 0.1542  |
|               |    | Z  | 0.0000  | 0.0968  | 0.0000  | 0.0892  | -0.0972 | 0.0000  |
| AT.           | 26 | O  | X       | -0.0059 | 0.0310  | 0.0022  | -0.0732 | 0.0314  |
|               |    | Y  | -0.0164 | 0.0053  | 0.4274  | -0.0005 | 0.0002  | -0.0626 |
|               |    | Z  | -0.0724 | -0.0114 | -0.0013 | 0.0800  | 0.0979  | 0.0319  |
| AT.           | 27 | O  | X       | 0.0059  | 0.0310  | -0.0022 | -0.0732 | 0.0314  |
|               |    | Y  | -0.0164 | -0.0053 | 0.4274  | 0.0005  | -0.0002 | -0.0626 |
|               |    | Z  | 0.0724  | -0.0114 | 0.0013  | 0.0800  | 0.0979  | -0.0319 |
| FREQ (CM**-1) |    |    | 81.47   | 98.59   | 117.04  | 123.89  | 128.53  | 137.68  |
| AT.           | 1  | CA | X       | 0.0000  | -0.0803 | -0.0416 | 0.0000  | 0.0000  |
|               |    | Y  | -0.0384 | 0.0000  | 0.0000  | 0.0538  | 0.0204  | 0.0000  |
|               |    | Z  | 0.0000  | -0.0293 | 0.0258  | 0.0000  | 0.0000  | -0.0221 |
| AT.           | 2  | CA | X       | 0.0249  | -0.0461 | -0.0080 | -0.0564 | 0.0165  |
|               |    | Y  | -0.0834 | 0.0181  | 0.0179  | -0.0149 | -0.0167 | -0.0221 |
|               |    | Z  | 0.0517  | -0.0077 | -0.0339 | 0.0063  | 0.0487  | 0.0411  |
| AT.           | 3  | CA | X       | -0.0249 | -0.0461 | -0.0080 | 0.0564  | -0.0165 |
|               |    | Y  | -0.0834 | -0.0181 | -0.0179 | -0.0149 | -0.0167 | 0.0221  |
|               |    | Z  | -0.0517 | -0.0077 | -0.0339 | -0.0063 | -0.0487 | 0.0411  |
| AT.           | 4  | CA | X       | -0.0147 | 0.0291  | -0.0209 | 0.0070  | 0.0053  |
|               |    | Y  | 0.0281  | -0.0114 | 0.0122  | -0.0134 | -0.0115 | 0.0062  |
|               |    | Z  | 0.0060  | -0.0211 | 0.0252  | -0.0087 | -0.0285 | -0.0029 |
| AT.           | 5  | CA | X       | 0.0147  | 0.0291  | -0.0209 | -0.0070 | -0.0053 |
|               |    | Y  | 0.0281  | 0.0114  | -0.0122 | -0.0134 | -0.0115 | -0.0062 |
|               |    | Z  | -0.0060 | -0.0211 | 0.0252  | 0.0087  | 0.0285  | -0.0029 |
| AT.           | 6  | CA | X       | 0.0000  | 0.0138  | 0.0348  | 0.0000  | 0.0000  |
|               |    | Y  | 0.0233  | 0.0000  | 0.0000  | -0.0398 | 0.0024  | 0.0000  |
|               |    | Z  | 0.0000  | -0.0105 | -0.0011 | 0.0000  | 0.0000  | -0.0334 |
| AT.           | 7  | CA | X       | 0.0000  | 0.0544  | -0.0274 | 0.0000  | 0.0000  |
|               |    | Y  | 0.0353  | 0.0000  | 0.0000  | 0.0080  | -0.0359 | 0.0000  |
|               |    | Z  | 0.0000  | 0.0334  | -0.0459 | 0.0000  | 0.0000  | 0.0039  |
| AT.           | 8  | CA | X       | 0.0074  | 0.0091  | 0.0442  | 0.0318  | 0.0138  |
|               |    | Y  | 0.0295  | -0.0079 | 0.0041  | 0.0146  | -0.0099 | -0.0181 |
|               |    | Z  | -0.0078 | 0.0093  | -0.0064 | -0.0100 | 0.0002  | -0.0033 |
| AT.           | 9  | CA | X       | -0.0074 | 0.0091  | 0.0442  | -0.0318 | -0.0138 |
|               |    | Y  | 0.0295  | 0.0079  | -0.0041 | 0.0146  | -0.0099 | 0.0181  |
|               |    | Z  | 0.0078  | 0.0093  | -0.0064 | 0.0100  | -0.0002 | -0.0033 |
| AT.           | 10 | SI | X       | 0.0000  | 0.0089  | 0.0113  | 0.0000  | 0.0000  |
|               |    | Y  | 0.0159  | 0.0000  | 0.0000  | -0.0049 | 0.0256  | 0.0000  |
|               |    | Z  | 0.0000  | 0.0237  | 0.0164  | 0.0000  | 0.0000  | -0.0191 |
| AT.           | 11 | SI | X       | 0.0000  | -0.0055 | -0.0034 | 0.0000  | 0.0000  |
|               |    | Y  | -0.0183 | 0.0000  | 0.0000  | -0.0001 | 0.0087  | 0.0000  |
|               |    | Z  | 0.0000  | 0.0014  | 0.0036  | 0.0000  | 0.0000  | 0.0113  |
| AT.           | 12 | SI | X       | 0.0000  | 0.0249  | -0.0126 | 0.0000  | 0.0000  |
|               |    | Y  | 0.0126  | 0.0000  | 0.0000  | 0.0079  | -0.0099 | 0.0000  |
|               |    | Z  | 0.0000  | -0.0040 | -0.0010 | 0.0000  | 0.0000  | -0.0003 |
| AT.           | 13 | O  | X       | 0.0000  | -0.0003 | -0.0675 | 0.0000  | 0.0000  |
|               |    | Y  | -0.0125 | 0.0000  | 0.0000  | -0.0108 | 0.1380  | 0.0000  |
|               |    | Z  | 0.0000  | 0.0254  | -0.0015 | 0.0000  | 0.0000  | -0.0150 |
| AT.           | 14 | O  | X       | -0.0075 | -0.0310 | -0.0108 | 0.0637  | -0.0036 |
|               |    | Y  | -0.0355 | 0.0022  | -0.0068 | 0.0269  | 0.0228  | 0.0042  |
|               |    | Z  | 0.0328  | -0.0335 | 0.0093  | 0.0137  | -0.0313 | -0.0092 |
| AT.           | 15 | O  | X       | 0.0075  | -0.0310 | -0.0108 | -0.0637 | 0.0036  |
|               |    | Y  | -0.0355 | -0.0022 | 0.0068  | 0.0269  | 0.0228  | -0.0042 |
|               |    | Z  | -0.0328 | -0.0335 | 0.0093  | -0.0137 | 0.0313  | -0.0092 |
| AT.           | 16 | O  | X       | 0.0000  | -0.0169 | -0.0004 | 0.0000  | 0.0000  |
|               |    | Y  | -0.0389 | 0.0000  | 0.0000  | -0.0724 | 0.0115  | 0.0000  |
|               |    | Z  | 0.0000  | 0.0642  | 0.0034  | 0.0000  | 0.0000  | 0.0780  |
| AT.           | 17 | O  | X       | 0.0000  | 0.0323  | -0.0042 | 0.0000  | 0.0000  |
|               |    | Y  | 0.0376  | 0.0000  | 0.0000  | -0.0029 | 0.0147  | 0.0000  |
|               |    | Z  | 0.0000  | 0.0204  | -0.0015 | 0.0000  | 0.0000  | -0.0066 |

|               |    |    |   |         |         |         |         |         |         |
|---------------|----|----|---|---------|---------|---------|---------|---------|---------|
| AT.           | 18 | O  | X | 0.0000  | 0.0518  | 0.0104  | 0.0000  | 0.0000  | 0.0514  |
|               |    |    | Y | 0.0309  | 0.0000  | 0.0000  | 0.0168  | -0.0133 | 0.0000  |
|               |    |    | Z | 0.0000  | -0.0057 | 0.0035  | 0.0000  | 0.0000  | 0.0060  |
| AT.           | 19 | O  | X | 0.0000  | 0.0028  | 0.0551  | 0.0000  | 0.0000  | 0.0050  |
|               |    |    | Y | 0.0419  | 0.0000  | 0.0000  | 0.0478  | -0.0051 | 0.0000  |
|               |    |    | Z | 0.0000  | 0.0382  | -0.0556 | 0.0000  | 0.0000  | -0.0021 |
| AT.           | 20 | O  | X | -0.0086 | 0.0116  | 0.0339  | -0.0391 | -0.0176 | 0.0187  |
|               |    |    | Y | 0.0193  | 0.0036  | 0.0015  | -0.0275 | 0.0006  | 0.0068  |
|               |    |    | Z | -0.0289 | 0.0219  | 0.0637  | -0.0061 | 0.0520  | -0.0408 |
| AT.           | 21 | O  | X | 0.0086  | 0.0116  | 0.0339  | 0.0391  | 0.0176  | 0.0187  |
|               |    |    | Y | 0.0193  | -0.0036 | -0.0015 | -0.0275 | 0.0006  | -0.0068 |
|               |    |    | Z | 0.0289  | 0.0219  | 0.0637  | 0.0061  | -0.0520 | -0.0408 |
| AT.           | 22 | O  | X | 0.0000  | -0.0280 | 0.0181  | 0.0000  | 0.0000  | 0.0008  |
|               |    |    | Y | -0.0153 | 0.0000  | 0.0000  | 0.0005  | 0.0051  | 0.0000  |
|               |    |    | Z | 0.0000  | -0.0016 | -0.0063 | 0.0000  | 0.0000  | 0.0001  |
| AT.           | 23 | O  | X | 0.0000  | 0.0226  | -0.0031 | 0.0000  | 0.0000  | -0.0111 |
|               |    |    | Y | 0.0198  | 0.0000  | 0.0000  | -0.0077 | 0.0063  | 0.0000  |
|               |    |    | Z | 0.0000  | 0.0012  | 0.0063  | 0.0000  | 0.0000  | -0.0001 |
| AT.           | 24 | O  | X | 0.0000  | 0.0667  | -0.0155 | 0.0000  | 0.0000  | -0.0081 |
|               |    |    | Y | -0.0501 | 0.0000  | 0.0000  | -0.0012 | 0.0175  | 0.0000  |
|               |    |    | Z | 0.0000  | 0.0187  | -0.0021 | 0.0000  | 0.0000  | 0.0076  |
| AT.           | 25 | O  | X | 0.0000  | 0.0131  | -0.0170 | 0.0000  | 0.0000  | -0.0366 |
|               |    |    | Y | 0.0139  | 0.0000  | 0.0000  | 0.0194  | 0.0089  | 0.0000  |
|               |    |    | Z | 0.0000  | 0.0088  | 0.0113  | 0.0000  | 0.0000  | 0.0160  |
| AT.           | 26 | O  | X | -0.0273 | 0.0263  | -0.0144 | 0.0031  | 0.0179  | -0.0232 |
|               |    |    | Y | 0.0362  | -0.0023 | 0.0020  | 0.0089  | -0.0258 | -0.0002 |
|               |    |    | Z | 0.0221  | -0.0096 | 0.0051  | 0.0189  | -0.0204 | -0.0126 |
| AT.           | 27 | O  | X | 0.0273  | 0.0263  | -0.0144 | -0.0031 | -0.0179 | -0.0232 |
|               |    |    | Y | 0.0362  | 0.0023  | -0.0020 | 0.0089  | -0.0258 | 0.0002  |
|               |    |    | Z | -0.0221 | -0.0096 | 0.0051  | -0.0189 | 0.0204  | -0.0126 |
| FREQ (CM**-1) |    |    |   | 142.62  | 154.64  | 157.00  | 159.62  | 168.53  | 173.57  |
| AT.           | 1  | CA | X | 0.0000  | 0.0287  | 0.0237  | 0.0000  | 0.0000  | 0.0095  |
|               |    |    | Y | -0.0074 | 0.0000  | 0.0000  | -0.0075 | 0.0150  | 0.0000  |
|               |    |    | Z | 0.0000  | 0.0504  | 0.0432  | 0.0000  | 0.0000  | -0.0163 |
| AT.           | 2  | CA | X | 0.0138  | 0.0082  | 0.0037  | 0.0286  | 0.0131  | 0.0046  |
|               |    |    | Y | -0.0060 | -0.0104 | -0.0003 | 0.0108  | -0.0211 | 0.0319  |
|               |    |    | Z | -0.0316 | -0.0104 | -0.0330 | 0.0018  | -0.0242 | -0.0294 |
| AT.           | 3  | CA | X | -0.0138 | 0.0082  | 0.0037  | -0.0286 | -0.0131 | 0.0046  |
|               |    |    | Y | -0.0060 | 0.0104  | 0.0003  | 0.0108  | -0.0211 | -0.0319 |
|               |    |    | Z | 0.0316  | -0.0104 | -0.0330 | -0.0018 | 0.0242  | -0.0294 |
| AT.           | 4  | CA | X | 0.0194  | -0.0153 | -0.0018 | 0.0014  | -0.0010 | -0.0208 |
|               |    |    | Y | -0.0454 | -0.0034 | -0.0122 | -0.0204 | 0.0277  | -0.0044 |
|               |    |    | Z | -0.0282 | 0.0077  | -0.0360 | -0.0240 | 0.0223  | -0.0010 |
| AT.           | 5  | CA | X | -0.0194 | -0.0153 | -0.0018 | -0.0014 | 0.0010  | -0.0208 |
|               |    |    | Y | -0.0454 | 0.0034  | 0.0122  | -0.0204 | 0.0277  | 0.0044  |
|               |    |    | Z | 0.0282  | 0.0077  | -0.0360 | 0.0240  | -0.0223 | -0.0010 |
| AT.           | 6  | CA | X | 0.0000  | -0.0323 | 0.0117  | 0.0000  | 0.0000  | 0.0266  |
|               |    |    | Y | 0.0224  | 0.0000  | 0.0000  | -0.0095 | -0.0172 | 0.0000  |
|               |    |    | Z | 0.0000  | -0.0058 | -0.0364 | 0.0000  | 0.0000  | -0.0070 |
| AT.           | 7  | CA | X | 0.0000  | -0.0009 | 0.0226  | 0.0000  | 0.0000  | 0.0037  |
|               |    |    | Y | -0.0197 | 0.0000  | 0.0000  | 0.0295  | -0.0228 | 0.0000  |
|               |    |    | Z | 0.0000  | 0.0048  | 0.0099  | 0.0000  | 0.0000  | 0.0220  |
| AT.           | 8  | CA | X | -0.0089 | -0.0074 | -0.0058 | 0.0345  | 0.0112  | -0.0029 |
|               |    |    | Y | 0.0480  | 0.0092  | -0.0095 | -0.0237 | 0.0140  | -0.0105 |
|               |    |    | Z | 0.0173  | 0.0205  | -0.0048 | -0.0157 | 0.0440  | -0.0008 |
| AT.           | 9  | CA | X | 0.0089  | -0.0074 | -0.0058 | -0.0345 | -0.0112 | -0.0029 |
|               |    |    | Y | 0.0480  | -0.0092 | 0.0095  | -0.0237 | 0.0140  | 0.0105  |
|               |    |    | Z | -0.0173 | 0.0205  | -0.0048 | 0.0157  | -0.0440 | -0.0008 |
| AT.           | 10 | SI | X | 0.0000  | -0.0113 | -0.0097 | 0.0000  | 0.0000  | 0.0105  |
|               |    |    | Y | 0.0191  | 0.0000  | 0.0000  | -0.0090 | 0.0094  | 0.0000  |
|               |    |    | Z | 0.0000  | 0.0112  | 0.0025  | 0.0000  | 0.0000  | 0.0123  |
| AT.           | 11 | SI | X | 0.0000  | 0.0246  | -0.0048 | 0.0000  | 0.0000  | 0.0276  |
|               |    |    | Y | 0.0035  | 0.0000  | 0.0000  | 0.0007  | -0.0099 | 0.0000  |
|               |    |    | Z | 0.0000  | -0.0252 | 0.0544  | 0.0000  | 0.0000  | -0.0172 |
| AT.           | 12 | SI | X | 0.0000  | -0.0102 | -0.0147 | 0.0000  | 0.0000  | -0.0281 |
|               |    |    | Y | -0.0118 | 0.0000  | 0.0000  | 0.0269  | -0.0069 | 0.0000  |
|               |    |    | Z | 0.0000  | -0.0204 | -0.0164 | 0.0000  | 0.0000  | 0.0332  |
| AT.           | 13 | O  | X | 0.0000  | -0.0186 | -0.0071 | 0.0000  | 0.0000  | 0.0751  |
|               |    |    | Y | 0.0226  | 0.0000  | 0.0000  | -0.0381 | -0.0037 | 0.0000  |
|               |    |    | Z | 0.0000  | 0.0071  | 0.0031  | 0.0000  | 0.0000  | 0.0259  |
| AT.           | 14 | O  | X | -0.0017 | -0.0044 | -0.0077 | -0.0238 | -0.0016 | 0.0161  |
|               |    |    | Y | -0.0116 | 0.0031  | -0.0008 | 0.0020  | 0.0216  | -0.0021 |
|               |    |    | Z | 0.0295  | -0.0645 | 0.0572  | -0.0248 | -0.0653 | -0.0212 |
| AT.           | 15 | O  | X | 0.0017  | -0.0044 | -0.0077 | 0.0238  | 0.0016  | 0.0161  |
|               |    |    | Y | -0.0116 | -0.0031 | 0.0008  | 0.0020  | 0.0216  | 0.0021  |
|               |    |    | Z | -0.0295 | -0.0645 | 0.0572  | 0.0248  | 0.0653  | -0.0212 |
| AT.           | 16 | O  | X | 0.0000  | 0.0091  | -0.0054 | 0.0000  | 0.0000  | 0.0262  |

|               |    |    |         |         |         |         |         |         |
|---------------|----|----|---------|---------|---------|---------|---------|---------|
|               |    | Y  | 0.0048  | 0.0000  | 0.0000  | 0.0378  | -0.0118 | 0.0000  |
|               |    | Z  | 0.0000  | 0.0523  | 0.0572  | 0.0000  | 0.0000  | -0.0182 |
| AT.           | 17 | O  | X       | 0.0000  | 0.0183  | 0.0119  | 0.0000  | 0.0000  |
|               |    | Y  | -0.0351 | 0.0000  | 0.0000  | 0.0019  | -0.0175 | 0.0000  |
|               |    | Z  | 0.0000  | 0.0209  | 0.0158  | 0.0000  | 0.0000  | 0.0277  |
| AT.           | 18 | O  | X       | 0.0000  | 0.0995  | -0.0238 | 0.0000  | 0.0000  |
|               |    | Y  | 0.0434  | 0.0000  | 0.0000  | -0.0371 | -0.0595 | 0.0000  |
|               |    | Z  | 0.0000  | -0.0375 | 0.0561  | 0.0000  | 0.0000  | -0.0145 |
| AT.           | 19 | O  | X       | 0.0000  | -0.0062 | -0.0137 | 0.0000  | 0.0000  |
|               |    | Y  | 0.0314  | 0.0000  | 0.0000  | 0.0287  | 0.0194  | 0.0000  |
|               |    | Z  | 0.0000  | 0.0020  | 0.0108  | 0.0000  | 0.0000  | 0.0510  |
| AT.           | 20 | O  | X       | 0.0020  | -0.0057 | -0.0074 | -0.0172 | -0.0173 |
|               |    | Y  | 0.0182  | 0.0007  | 0.0001  | -0.0095 | 0.0012  | -0.0008 |
|               |    | Z  | 0.0027  | 0.0162  | 0.0064  | -0.0281 | -0.0133 | -0.0006 |
| AT.           | 21 | O  | X       | -0.0020 | -0.0057 | -0.0074 | 0.0172  | 0.0173  |
|               |    | Y  | 0.0182  | -0.0007 | -0.0001 | -0.0095 | 0.0012  | 0.0008  |
|               |    | Z  | -0.0027 | 0.0162  | 0.0064  | 0.0281  | 0.0133  | -0.0006 |
| AT.           | 22 | O  | X       | 0.0000  | -0.0099 | 0.0028  | 0.0000  | 0.0000  |
|               |    | Y  | -0.0013 | 0.0000  | 0.0000  | 0.0079  | 0.0336  | 0.0000  |
|               |    | Z  | 0.0000  | 0.0042  | 0.0101  | 0.0000  | 0.0000  | -0.0008 |
| AT.           | 23 | O  | X       | 0.0000  | -0.0071 | -0.0079 | 0.0000  | 0.0000  |
|               |    | Y  | -0.0129 | 0.0000  | 0.0000  | -0.0142 | -0.0027 | 0.0000  |
|               |    | Z  | 0.0000  | 0.0040  | 0.0069  | 0.0000  | 0.0000  | 0.0018  |
| AT.           | 24 | O  | X       | 0.0000  | 0.0166  | -0.0049 | 0.0000  | 0.0000  |
|               |    | Y  | -0.0492 | 0.0000  | 0.0000  | -0.0065 | -0.0323 | 0.0000  |
|               |    | Z  | 0.0000  | -0.0089 | -0.0113 | 0.0000  | 0.0000  | 0.0243  |
| AT.           | 25 | O  | X       | 0.0000  | -0.0151 | -0.0300 | 0.0000  | 0.0000  |
|               |    | Y  | 0.0260  | 0.0000  | 0.0000  | 0.0987  | 0.0253  | 0.0000  |
|               |    | Z  | 0.0000  | -0.0132 | 0.0012  | 0.0000  | 0.0000  | 0.0159  |
| AT.           | 26 | O  | X       | 0.0154  | -0.0181 | -0.0144 | 0.0156  | 0.0072  |
|               |    | Y  | -0.0176 | 0.0016  | 0.0001  | 0.0194  | -0.0123 | -0.0023 |
|               |    | Z  | 0.0329  | -0.0342 | -0.0186 | 0.0353  | 0.0042  | 0.0444  |
| AT.           | 27 | O  | X       | -0.0154 | -0.0181 | -0.0144 | -0.0156 | -0.0072 |
|               |    | Y  | -0.0176 | -0.0016 | -0.0001 | 0.0194  | -0.0123 | 0.0023  |
|               |    | Z  | -0.0329 | -0.0342 | -0.0186 | -0.0353 | -0.0042 | 0.0444  |
| FREQ (CM**-1) |    |    | 177.15  | 180.11  | 184.93  | 197.81  | 197.85  | 199.48  |
| AT.           | 1  | CA | X       | 0.0000  | -0.0194 | 0.0000  | 0.0158  | 0.0000  |
|               |    | Y  | 0.0559  | 0.0000  | 0.0040  | 0.0000  | 0.0039  | -0.0111 |
|               |    | Z  | 0.0000  | -0.0352 | 0.0000  | 0.0119  | 0.0000  | 0.0000  |
| AT.           | 2  | CA | X       | 0.0168  | 0.0235  | 0.0169  | -0.0109 | 0.0151  |
|               |    | Y  | -0.0220 | 0.0064  | -0.0011 | 0.0016  | 0.0073  | 0.0109  |
|               |    | Z  | -0.0016 | 0.0039  | -0.0064 | 0.0024  | 0.0176  | 0.0171  |
| AT.           | 3  | CA | X       | -0.0168 | 0.0235  | -0.0169 | -0.0109 | -0.0151 |
|               |    | Y  | -0.0220 | -0.0064 | -0.0011 | -0.0016 | 0.0073  | 0.0109  |
|               |    | Z  | 0.0016  | 0.0039  | 0.0064  | 0.0024  | -0.0176 | -0.0171 |
| AT.           | 4  | CA | X       | -0.0134 | -0.0049 | 0.0278  | -0.0014 | -0.0231 |
|               |    | Y  | -0.0176 | 0.0025  | 0.0167  | -0.0262 | 0.0039  | -0.0287 |
|               |    | Z  | -0.0019 | 0.0066  | 0.0145  | 0.0031  | 0.0100  | 0.0442  |
| AT.           | 5  | CA | X       | 0.0134  | -0.0049 | -0.0278 | -0.0014 | 0.0231  |
|               |    | Y  | -0.0176 | -0.0025 | 0.0167  | 0.0262  | 0.0039  | -0.0287 |
|               |    | Z  | 0.0019  | 0.0066  | -0.0145 | 0.0031  | -0.0100 | -0.0442 |
| AT.           | 6  | CA | X       | 0.0000  | -0.0369 | 0.0000  | -0.0303 | 0.0000  |
|               |    | Y  | 0.0135  | 0.0000  | -0.0155 | 0.0000  | -0.0438 | 0.0129  |
|               |    | Z  | 0.0000  | 0.0204  | 0.0000  | 0.0404  | 0.0000  | 0.0000  |
| AT.           | 7  | CA | X       | 0.0000  | 0.0013  | 0.0000  | 0.0496  | 0.0000  |
|               |    | Y  | 0.0186  | 0.0000  | -0.0191 | 0.0000  | -0.0197 | -0.0082 |
|               |    | Z  | 0.0000  | -0.0274 | 0.0000  | 0.0017  | 0.0000  | 0.0000  |
| AT.           | 8  | CA | X       | -0.0249 | -0.0094 | 0.0145  | 0.0148  | 0.0032  |
|               |    | Y  | -0.0149 | 0.0000  | 0.0039  | 0.0159  | 0.0167  | 0.0121  |
|               |    | Z  | -0.0038 | -0.0358 | -0.0453 | -0.0119 | 0.0272  | -0.0209 |
| AT.           | 9  | CA | X       | 0.0249  | -0.0094 | -0.0145 | 0.0148  | -0.0032 |
|               |    | Y  | -0.0149 | -0.0000 | 0.0039  | -0.0159 | 0.0167  | 0.0121  |
|               |    | Z  | 0.0038  | -0.0358 | 0.0453  | -0.0119 | -0.0272 | 0.0209  |
| AT.           | 10 | SI | X       | 0.0000  | -0.0085 | 0.0000  | 0.0374  | 0.0000  |
|               |    | Y  | -0.0203 | 0.0000  | 0.0073  | 0.0000  | -0.0343 | 0.0204  |
|               |    | Z  | 0.0000  | -0.0013 | 0.0000  | -0.0223 | 0.0000  | 0.0000  |
| AT.           | 11 | SI | X       | 0.0000  | 0.0307  | 0.0000  | -0.0240 | 0.0000  |
|               |    | Y  | 0.0428  | 0.0000  | 0.0310  | 0.0000  | 0.0367  | -0.0029 |
|               |    | Z  | 0.0000  | 0.0352  | 0.0000  | 0.0005  | 0.0000  | 0.0000  |
| AT.           | 12 | SI | X       | 0.0000  | 0.0006  | 0.0000  | -0.0275 | 0.0000  |
|               |    | Y  | -0.0140 | 0.0000  | -0.0389 | 0.0000  | 0.0004  | -0.0164 |
|               |    | Z  | 0.0000  | 0.0070  | 0.0000  | 0.0156  | 0.0000  | 0.0000  |
| AT.           | 13 | O  | X       | 0.0000  | -0.0018 | 0.0000  | 0.0256  | 0.0000  |
|               |    | Y  | -0.0160 | 0.0000  | -0.0082 | 0.0000  | -0.0261 | 0.0144  |
|               |    | Z  | 0.0000  | -0.0013 | 0.0000  | -0.0208 | 0.0000  | 0.0000  |
| AT.           | 14 | O  | X       | 0.0094  | 0.0135  | -0.0203 | -0.0261 | -0.0171 |
|               |    | Y  | 0.0549  | -0.0024 | 0.0143  | 0.0003  | 0.0074  | 0.0025  |



|              |    |      |         |         |         |         |         |         |
|--------------|----|------|---------|---------|---------|---------|---------|---------|
|              |    | Z    | -0.0171 | 0.0211  | 0.0079  | -0.0055 | 0.0386  | -0.0185 |
| AT.          | 15 | O X  | -0.0094 | 0.0135  | 0.0203  | -0.0261 | 0.0171  | 0.0028  |
|              |    | Y    | 0.0549  | 0.0024  | 0.0143  | -0.0003 | 0.0074  | 0.0025  |
|              |    | Z    | 0.0171  | 0.0211  | -0.0079 | -0.0055 | -0.0386 | 0.0185  |
| AT.          | 16 | O X  | 0.0000  | 0.0203  | 0.0000  | -0.0208 | 0.0000  | 0.0000  |
|              |    | Y    | 0.0078  | 0.0000  | 0.0324  | 0.0000  | 0.0334  | 0.0031  |
|              |    | Z    | 0.0000  | 0.0857  | 0.0000  | 0.0035  | 0.0000  | 0.0000  |
| AT.          | 17 | O X  | 0.0000  | 0.0210  | 0.0000  | 0.0101  | 0.0000  | 0.0000  |
|              |    | Y    | 0.0129  | 0.0000  | 0.0021  | 0.0000  | 0.0287  | -0.0220 |
|              |    | Z    | 0.0000  | -0.0051 | 0.0000  | -0.0063 | 0.0000  | 0.0000  |
| AT.          | 18 | O X  | 0.0000  | 0.0698  | 0.0000  | -0.0052 | 0.0000  | 0.0000  |
|              |    | Y    | 0.0160  | 0.0000  | 0.0308  | 0.0000  | 0.0549  | -0.0099 |
|              |    | Z    | 0.0000  | 0.0292  | 0.0000  | -0.0014 | 0.0000  | 0.0000  |
| AT.          | 19 | O X  | 0.0000  | -0.0036 | 0.0000  | 0.0372  | 0.0000  | 0.0000  |
|              |    | Y    | -0.0462 | 0.0000  | 0.0412  | 0.0000  | -0.0164 | 0.0118  |
|              |    | Z    | 0.0000  | -0.0074 | 0.0000  | -0.0252 | 0.0000  | 0.0000  |
| AT.          | 20 | O X  | 0.0242  | -0.0070 | -0.0271 | 0.0215  | -0.0079 | 0.0002  |
|              |    | Y    | -0.0010 | -0.0005 | -0.0054 | -0.0096 | -0.0383 | 0.0209  |
|              |    | Z    | -0.0066 | 0.0022  | -0.0272 | -0.0164 | 0.0060  | -0.0103 |
| AT.          | 21 | O X  | -0.0242 | -0.0070 | 0.0271  | 0.0215  | 0.0079  | -0.0002 |
|              |    | Y    | -0.0010 | 0.0005  | -0.0054 | 0.0096  | -0.0383 | 0.0209  |
|              |    | Z    | 0.0066  | 0.0022  | 0.0272  | -0.0164 | -0.0060 | 0.0103  |
| AT.          | 22 | O X  | 0.0000  | -0.0162 | 0.0000  | -0.0019 | 0.0000  | 0.0000  |
|              |    | Y    | 0.0155  | 0.0000  | 0.0283  | 0.0000  | -0.0259 | 0.0269  |
|              |    | Z    | 0.0000  | -0.0065 | 0.0000  | -0.0010 | 0.0000  | 0.0000  |
| AT.          | 23 | O X  | 0.0000  | -0.0001 | 0.0000  | 0.0119  | 0.0000  | 0.0000  |
|              |    | Y    | -0.0119 | 0.0000  | -0.0132 | 0.0000  | -0.0003 | -0.0144 |
|              |    | Z    | 0.0000  | -0.0108 | 0.0000  | -0.0071 | 0.0000  | 0.0000  |
| AT.          | 24 | O X  | 0.0000  | -0.0064 | 0.0000  | -0.0384 | 0.0000  | 0.0000  |
|              |    | Y    | -0.0420 | 0.0000  | -0.0232 | 0.0000  | 0.0231  | -0.0061 |
|              |    | Z    | 0.0000  | 0.0045  | 0.0000  | 0.0092  | 0.0000  | 0.0000  |
| AT.          | 25 | O X  | 0.0000  | 0.0049  | 0.0000  | -0.0340 | 0.0000  | 0.0000  |
|              |    | Y    | -0.0282 | 0.0000  | -0.0546 | 0.0000  | 0.0263  | 0.0343  |
|              |    | Z    | 0.0000  | 0.0016  | 0.0000  | 0.0282  | 0.0000  | 0.0000  |
| AT.          | 26 | O X  | -0.0253 | 0.0052  | 0.0016  | -0.0181 | 0.0239  | 0.0139  |
|              |    | Y    | 0.0111  | 0.0008  | -0.0370 | -0.0070 | -0.0157 | -0.0215 |
|              |    | Z    | 0.0394  | 0.0244  | -0.0026 | -0.0017 | 0.0106  | 0.0173  |
| AT.          | 27 | O X  | 0.0253  | 0.0052  | -0.0016 | -0.0181 | -0.0239 | -0.0139 |
|              |    | Y    | 0.0111  | -0.0008 | -0.0370 | 0.0070  | -0.0157 | -0.0215 |
|              |    | Z    | -0.0394 | 0.0244  | 0.0026  | -0.0017 | -0.0106 | -0.0173 |
| FREQ (CM*-1) |    |      | 210.80  | 214.01  | 217.35  | 220.84  | 226.53  | 245.28  |
| AT.          | 1  | CA X | -0.0085 | -0.0369 | 0.0000  | -0.0135 | 0.0020  | 0.0000  |
|              |    | Y    | 0.0000  | 0.0000  | -0.0098 | 0.0000  | 0.0000  | 0.0001  |
|              |    | Z    | -0.0493 | 0.0228  | 0.0000  | -0.0078 | 0.0194  | 0.0000  |
| AT.          | 2  | CA X | 0.0150  | 0.0078  | 0.0068  | -0.0031 | -0.0151 | 0.0139  |
|              |    | Y    | -0.0125 | 0.0192  | -0.0054 | 0.0275  | 0.0158  | -0.0264 |
|              |    | Z    | 0.0072  | 0.0148  | 0.0101  | -0.0061 | 0.0087  | -0.0328 |
| AT.          | 3  | CA X | 0.0150  | 0.0078  | -0.0068 | -0.0031 | -0.0151 | -0.0139 |
|              |    | Y    | 0.0125  | -0.0192 | -0.0054 | -0.0275 | -0.0158 | -0.0264 |
|              |    | Z    | 0.0072  | 0.0148  | -0.0101 | -0.0061 | 0.0087  | 0.0328  |
| AT.          | 4  | CA X | 0.0027  | 0.0028  | 0.0280  | 0.0186  | -0.0002 | -0.0227 |
|              |    | Y    | -0.0037 | -0.0232 | -0.0138 | 0.0247  | -0.0105 | -0.0041 |
|              |    | Z    | -0.0215 | 0.0013  | 0.0117  | 0.0231  | -0.0386 | -0.0058 |
| AT.          | 5  | CA X | 0.0027  | 0.0028  | -0.0280 | 0.0186  | -0.0002 | 0.0227  |
|              |    | Y    | 0.0037  | 0.0232  | -0.0138 | -0.0247 | 0.0105  | -0.0041 |
|              |    | Z    | -0.0215 | 0.0013  | -0.0117 | 0.0231  | -0.0386 | 0.0058  |
| AT.          | 6  | CA X | -0.0274 | 0.0246  | 0.0000  | -0.0290 | -0.0039 | 0.0000  |
|              |    | Y    | 0.0000  | 0.0000  | -0.0301 | 0.0000  | 0.0000  | -0.0099 |
|              |    | Z    | -0.0160 | 0.0039  | 0.0000  | -0.0204 | -0.0007 | 0.0000  |
| AT.          | 7  | CA X | 0.0021  | 0.0175  | 0.0000  | -0.0099 | -0.0358 | 0.0000  |
|              |    | Y    | 0.0000  | 0.0000  | 0.0118  | 0.0000  | 0.0000  | 0.0208  |
|              |    | Z    | 0.0332  | 0.0083  | 0.0000  | -0.0157 | -0.0337 | 0.0000  |
| AT.          | 8  | CA X | 0.0038  | -0.0017 | -0.0331 | 0.0048  | -0.0064 | 0.0023  |
|              |    | Y    | 0.0059  | -0.0113 | 0.0345  | 0.0141  | 0.0309  | -0.0015 |
|              |    | Z    | 0.0234  | 0.0105  | -0.0203 | 0.0233  | 0.0225  | -0.0166 |
| AT.          | 9  | CA X | 0.0038  | -0.0017 | 0.0331  | 0.0048  | -0.0064 | -0.0023 |
|              |    | Y    | -0.0059 | 0.0113  | 0.0345  | -0.0141 | -0.0309 | -0.0015 |
|              |    | Z    | 0.0234  | 0.0105  | 0.0203  | 0.0233  | 0.0225  | 0.0166  |
| AT.          | 10 | SI X | 0.0159  | -0.0292 | 0.0000  | 0.0150  | 0.0134  | 0.0000  |
|              |    | Y    | 0.0000  | 0.0000  | -0.0291 | 0.0000  | 0.0000  | 0.0027  |
|              |    | Z    | 0.0146  | -0.0356 | 0.0000  | -0.0175 | -0.0108 | 0.0000  |
| AT.          | 11 | SI X | 0.0194  | 0.0343  | 0.0000  | 0.0068  | 0.0097  | 0.0000  |
|              |    | Y    | 0.0000  | 0.0000  | -0.0081 | 0.0000  | 0.0000  | 0.0064  |
|              |    | Z    | 0.0035  | -0.0049 | 0.0000  | 0.0187  | -0.0003 | 0.0000  |
| AT.          | 12 | SI X | -0.0318 | -0.0162 | 0.0000  | -0.0136 | 0.0083  | 0.0000  |
|              |    | Y    | 0.0000  | 0.0000  | 0.0299  | 0.0000  | 0.0000  | 0.0047  |
|              |    | Z    | -0.0103 | 0.0060  | 0.0000  | -0.0211 | 0.0312  | 0.0000  |

|     |    |   |   |         |         |         |         |         |         |
|-----|----|---|---|---------|---------|---------|---------|---------|---------|
| AT. | 13 | O | X | -0.0299 | -0.0553 | 0.0000  | 0.0484  | 0.0185  | 0.0000  |
|     |    |   | Y | 0.0000  | 0.0000  | -0.0045 | 0.0000  | 0.0000  | -0.0002 |
|     |    |   | Z | 0.0014  | -0.0373 | 0.0000  | -0.0088 | -0.0017 | 0.0000  |
| AT. | 14 | O | X | 0.0171  | 0.0228  | -0.0057 | 0.0066  | 0.0100  | 0.0114  |
|     |    |   | Y | -0.0031 | -0.0088 | 0.0054  | 0.0014  | -0.0032 | 0.0075  |
|     |    |   | Z | 0.0078  | 0.0020  | -0.0356 | 0.0122  | 0.0080  | 0.0070  |
| AT. | 15 | O | X | 0.0171  | 0.0228  | 0.0057  | 0.0066  | 0.0100  | -0.0114 |
|     |    |   | Y | 0.0031  | 0.0088  | 0.0054  | -0.0014 | 0.0032  | 0.0075  |
|     |    |   | Z | 0.0078  | 0.0020  | 0.0356  | 0.0122  | 0.0080  | -0.0070 |
| AT. | 16 | O | X | 0.0197  | 0.0350  | 0.0000  | 0.0097  | 0.0053  | 0.0000  |
|     |    |   | Y | 0.0000  | 0.0000  | 0.0010  | 0.0000  | 0.0000  | -0.0252 |
|     |    |   | Z | -0.0212 | -0.0218 | 0.0000  | 0.0031  | 0.0161  | 0.0000  |
| AT. | 17 | O | X | -0.0127 | 0.0144  | 0.0000  | 0.0088  | -0.0039 | 0.0000  |
|     |    |   | Y | 0.0000  | 0.0000  | 0.0001  | 0.0000  | 0.0000  | 0.0093  |
|     |    |   | Z | -0.0344 | -0.0102 | 0.0000  | 0.0226  | -0.0296 | 0.0000  |
| AT. | 18 | O | X | 0.0023  | 0.0132  | 0.0000  | -0.0104 | 0.0197  | 0.0000  |
|     |    |   | Y | 0.0000  | 0.0000  | -0.0328 | 0.0000  | 0.0000  | 0.0206  |
|     |    |   | Z | 0.0056  | -0.0017 | 0.0000  | 0.0199  | 0.0031  | 0.0000  |
| AT. | 19 | O | X | 0.0321  | -0.0228 | 0.0000  | -0.0046 | 0.0112  | 0.0000  |
|     |    |   | Y | 0.0000  | 0.0000  | -0.0088 | 0.0000  | 0.0000  | -0.0048 |
|     |    |   | Z | -0.0176 | -0.0432 | 0.0000  | 0.0157  | -0.0086 | 0.0000  |
| AT. | 20 | O | X | 0.0173  | -0.0168 | 0.0024  | 0.0059  | 0.0081  | 0.0112  |
|     |    |   | Y | -0.0046 | 0.0063  | -0.0294 | 0.0004  | -0.0048 | 0.0078  |
|     |    |   | Z | 0.0411  | -0.0359 | 0.0188  | -0.0346 | -0.0028 | 0.0087  |
| AT. | 21 | O | X | 0.0173  | -0.0168 | -0.0024 | 0.0059  | 0.0081  | -0.0112 |
|     |    |   | Y | 0.0046  | -0.0063 | -0.0294 | -0.0004 | 0.0048  | 0.0078  |
|     |    |   | Z | 0.0411  | -0.0359 | -0.0188 | -0.0346 | -0.0028 | -0.0087 |
| AT. | 22 | O | X | 0.0233  | -0.0011 | 0.0000  | -0.0005 | 0.0088  | 0.0000  |
|     |    |   | Y | 0.0000  | 0.0000  | 0.0180  | 0.0000  | 0.0000  | 0.0259  |
|     |    |   | Z | -0.0142 | 0.0012  | 0.0000  | 0.0005  | 0.0042  | 0.0000  |
| AT. | 23 | O | X | -0.0144 | -0.0017 | 0.0000  | 0.0025  | 0.0006  | 0.0000  |
|     |    |   | Y | 0.0000  | 0.0000  | 0.0006  | 0.0000  | 0.0000  | 0.0162  |
|     |    |   | Z | 0.0044  | 0.0111  | 0.0000  | 0.0198  | -0.0166 | 0.0000  |
| AT. | 24 | O | X | -0.0110 | -0.0083 | 0.0000  | 0.0043  | 0.0105  | 0.0000  |
|     |    |   | Y | 0.0000  | 0.0000  | 0.0303  | 0.0000  | 0.0000  | 0.0540  |
|     |    |   | Z | -0.0024 | 0.0039  | 0.0000  | -0.0100 | 0.0268  | 0.0000  |
| AT. | 25 | O | X | -0.0366 | -0.0199 | 0.0000  | -0.0355 | 0.0248  | 0.0000  |
|     |    |   | Y | 0.0000  | 0.0000  | 0.0069  | 0.0000  | 0.0000  | 0.0270  |
|     |    |   | Z | -0.0008 | 0.0108  | 0.0000  | 0.0037  | 0.0038  | 0.0000  |
| AT. | 26 | O | X | -0.0274 | -0.0113 | 0.0048  | -0.0111 | 0.0081  | 0.0308  |
|     |    |   | Y | -0.0017 | -0.0033 | 0.0214  | -0.0030 | 0.0007  | -0.0227 |
|     |    |   | Z | -0.0046 | -0.0047 | -0.0090 | -0.0365 | 0.0205  | -0.0525 |
| AT. | 27 | O | X | -0.0274 | -0.0113 | -0.0048 | -0.0111 | 0.0081  | -0.0308 |
|     |    |   | Y | 0.0017  | 0.0033  | 0.0214  | 0.0030  | -0.0007 | -0.0227 |
|     |    |   | Z | -0.0046 | -0.0047 | 0.0090  | -0.0365 | 0.0205  | 0.0525  |

|                |    |    |   |         |         |         |         |         |         |
|----------------|----|----|---|---------|---------|---------|---------|---------|---------|
| FREQ (CM** -1) |    |    |   | 245.97  | 255.15  | 258.08  | 260.36  | 269.14  | 269.82  |
| AT.            | 1  | CA | X | 0.0195  | 0.0000  | -0.0220 | 0.0079  | 0.0090  | 0.0375  |
|                |    |    | Y | 0.0000  | -0.0001 | 0.0000  | 0.0000  | 0.0000  | 0.0000  |
|                |    |    | Z | -0.0065 | 0.0000  | 0.0128  | 0.0137  | 0.0053  | -0.0484 |
| AT.            | 2  | CA | X | 0.0029  | -0.0061 | -0.0002 | -0.0155 | -0.0053 | -0.0083 |
|                |    |    | Y | 0.0046  | 0.0094  | 0.0009  | 0.0157  | 0.0198  | 0.0150  |
|                |    |    | Z | 0.0123  | -0.0018 | 0.0277  | 0.0112  | 0.0158  | -0.0004 |
| AT.            | 3  | CA | X | 0.0029  | 0.0061  | -0.0002 | -0.0155 | -0.0053 | -0.0083 |
|                |    |    | Y | -0.0046 | 0.0094  | -0.0009 | -0.0157 | -0.0198 | -0.0150 |
|                |    |    | Z | 0.0123  | 0.0018  | 0.0277  | 0.0112  | 0.0158  | -0.0004 |
| AT.            | 4  | CA | X | 0.0361  | -0.0293 | -0.0110 | 0.0203  | -0.0207 | -0.0132 |
|                |    |    | Y | 0.0122  | 0.0277  | -0.0244 | 0.0124  | 0.0321  | -0.0187 |
|                |    |    | Z | -0.0026 | -0.0388 | 0.0047  | -0.0215 | 0.0013  | 0.0010  |
| AT.            | 5  | CA | X | 0.0361  | 0.0293  | -0.0110 | 0.0203  | -0.0207 | -0.0132 |
|                |    |    | Y | -0.0122 | 0.0277  | 0.0244  | -0.0124 | -0.0321 | 0.0187  |
|                |    |    | Z | -0.0026 | 0.0388  | 0.0047  | -0.0215 | 0.0013  | 0.0010  |
| AT.            | 6  | CA | X | 0.0190  | 0.0000  | 0.0053  | -0.0062 | 0.0200  | 0.0181  |
|                |    |    | Y | 0.0000  | 0.0001  | 0.0000  | 0.0000  | 0.0000  | 0.0000  |
|                |    |    | Z | -0.0073 | 0.0000  | -0.0220 | 0.0392  | -0.0107 | 0.0184  |
| AT.            | 7  | CA | X | 0.0219  | 0.0000  | 0.0175  | -0.0328 | 0.0294  | 0.0059  |
|                |    |    | Y | 0.0000  | -0.0061 | 0.0000  | 0.0000  | 0.0000  | 0.0000  |
|                |    |    | Z | -0.0478 | 0.0000  | -0.0283 | 0.0245  | 0.0270  | -0.0201 |
| AT.            | 8  | CA | X | -0.0124 | -0.0060 | -0.0012 | 0.0062  | -0.0266 | -0.0038 |
|                |    |    | Y | -0.0009 | 0.0235  | 0.0100  | -0.0112 | 0.0226  | 0.0046  |
|                |    |    | Z | -0.0015 | -0.0229 | -0.0112 | -0.0234 | -0.0128 | 0.0138  |
| AT.            | 9  | CA | X | -0.0124 | 0.0060  | -0.0012 | 0.0062  | -0.0266 | -0.0038 |
|                |    |    | Y | 0.0009  | 0.0235  | -0.0100 | 0.0112  | -0.0226 | -0.0046 |
|                |    |    | Z | -0.0015 | 0.0229  | -0.0112 | -0.0234 | -0.0128 | 0.0138  |
| AT.            | 10 | SI | X | -0.0247 | 0.0000  | 0.0099  | 0.0026  | 0.0064  | -0.0106 |
|                |    |    | Y | 0.0000  | -0.0190 | 0.0000  | 0.0000  | 0.0000  | 0.0000  |
|                |    |    | Z | 0.0172  | 0.0000  | 0.0331  | 0.0038  | -0.0000 | -0.0159 |
| AT.            | 11 | SI | X | -0.0084 | 0.0000  | 0.0072  | 0.0125  | 0.0038  | -0.0018 |

|                |    |      |         |         |         |         |         |         |        |
|----------------|----|------|---------|---------|---------|---------|---------|---------|--------|
|                |    | Y    | 0.0000  | -0.0160 | 0.0000  | 0.0000  | 0.0000  | 0.0000  | 0.0000 |
|                |    | Z    | -0.0154 | 0.0000  | -0.0070 | -0.0036 | 0.0013  | 0.0064  |        |
| AT.            | 12 | SI X | -0.0198 | 0.0000  | -0.0141 | -0.0008 | 0.0048  | 0.0048  |        |
|                |    | Y    | 0.0000  | -0.0246 | 0.0000  | 0.0000  | 0.0000  | 0.0000  |        |
|                |    | Z    | 0.0201  | 0.0000  | -0.0259 | -0.0105 | 0.0027  | -0.0104 |        |
| AT.            | 13 | O X  | -0.0161 | 0.0000  | 0.0312  | -0.0075 | -0.0103 | -0.0242 |        |
|                |    | Y    | 0.0000  | -0.0109 | 0.0000  | 0.0000  | 0.0000  | 0.0000  |        |
|                |    | Z    | 0.0180  | 0.0000  | 0.0343  | 0.0017  | -0.0053 | -0.0182 |        |
| AT.            | 14 | O X  | -0.0080 | -0.0042 | 0.0103  | 0.0080  | -0.0005 | -0.0023 |        |
|                |    | Y    | 0.0004  | -0.0068 | -0.0083 | -0.0071 | 0.0009  | 0.0019  |        |
|                |    | Z    | -0.0149 | -0.0184 | 0.0164  | 0.0082  | 0.0015  | 0.0022  |        |
| AT.            | 15 | O X  | -0.0080 | 0.0042  | 0.0103  | 0.0080  | -0.0005 | -0.0023 |        |
|                |    | Y    | -0.0004 | -0.0068 | 0.0083  | 0.0071  | -0.0009 | -0.0019 |        |
|                |    | Z    | -0.0149 | 0.0184  | 0.0164  | 0.0082  | 0.0015  | 0.0022  |        |
| AT.            | 16 | O X  | -0.0096 | 0.0000  | 0.0101  | 0.0144  | 0.0068  | 0.0001  |        |
|                |    | Y    | 0.0000  | -0.0056 | 0.0000  | 0.0000  | 0.0000  | 0.0000  |        |
|                |    | Z    | 0.0092  | 0.0000  | -0.0223 | -0.0194 | 0.0061  | 0.0065  |        |
| AT.            | 17 | O X  | 0.0079  | 0.0000  | -0.0084 | -0.0109 | 0.0136  | -0.0078 |        |
|                |    | Y    | 0.0000  | -0.0136 | 0.0000  | 0.0000  | 0.0000  | 0.0000  |        |
|                |    | Z    | -0.0056 | 0.0000  | 0.0120  | 0.0422  | -0.0001 | 0.0568  |        |
| AT.            | 18 | O X  | -0.0081 | 0.0000  | 0.0018  | 0.0260  | -0.0068 | 0.0027  |        |
|                |    | Y    | 0.0000  | -0.0260 | 0.0000  | 0.0000  | 0.0000  | 0.0000  |        |
|                |    | Z    | -0.0110 | 0.0000  | -0.0075 | -0.0056 | 0.0014  | 0.0068  |        |
| AT.            | 19 | O X  | -0.0162 | 0.0000  | 0.0023  | -0.0012 | 0.0295  | -0.0076 |        |
|                |    | Y    | 0.0000  | -0.0231 | 0.0000  | 0.0000  | 0.0000  | 0.0000  |        |
|                |    | Z    | 0.0039  | 0.0000  | 0.0382  | 0.0079  | -0.0355 | -0.0114 |        |
| AT.            | 20 | O X  | -0.0137 | 0.0020  | 0.0012  | 0.0079  | 0.0079  | -0.0029 |        |
|                |    | Y    | 0.0027  | -0.0170 | -0.0028 | 0.0008  | 0.0023  | -0.0024 |        |
|                |    | Z    | 0.0273  | 0.0097  | 0.0113  | 0.0129  | 0.0064  | 0.0195  |        |
| AT.            | 21 | O X  | -0.0137 | -0.0020 | 0.0012  | 0.0079  | 0.0079  | -0.0029 |        |
|                |    | Y    | -0.0027 | -0.0170 | 0.0028  | -0.0008 | -0.0023 | 0.0024  |        |
|                |    | Z    | 0.0273  | -0.0097 | 0.0113  | 0.0129  | 0.0064  | 0.0195  |        |
| AT.            | 22 | O X  | 0.0027  | 0.0000  | 0.0057  | 0.0059  | 0.0195  | 0.0025  |        |
|                |    | Y    | 0.0000  | -0.0025 | 0.0000  | 0.0000  | 0.0000  | 0.0000  |        |
|                |    | Z    | -0.0030 | 0.0000  | 0.0067  | 0.0145  | -0.0229 | 0.0255  |        |
| AT.            | 23 | O X  | -0.0046 | 0.0000  | 0.0110  | 0.0034  | -0.0089 | 0.0030  |        |
|                |    | Y    | 0.0000  | 0.0086  | 0.0000  | 0.0000  | 0.0000  | 0.0000  |        |
|                |    | Z    | -0.0197 | 0.0000  | -0.0029 | -0.0026 | -0.0159 | 0.0437  |        |
| AT.            | 24 | O X  | -0.0219 | 0.0000  | -0.0266 | -0.0325 | 0.0114  | 0.0073  |        |
|                |    | Y    | 0.0000  | -0.0272 | 0.0000  | 0.0000  | 0.0000  | 0.0000  |        |
|                |    | Z    | 0.0193  | 0.0000  | -0.0249 | -0.0210 | 0.0042  | -0.0136 |        |
| AT.            | 25 | O X  | -0.0387 | 0.0000  | 0.0155  | -0.0047 | 0.0090  | 0.0125  |        |
|                |    | Y    | 0.0000  | 0.0023  | 0.0000  | 0.0000  | 0.0000  | 0.0000  |        |
|                |    | Z    | 0.0348  | 0.0000  | -0.0524 | -0.0064 | -0.0055 | -0.0124 |        |
| AT.            | 26 | O X  | -0.0258 | -0.0002 | -0.0033 | -0.0134 | 0.0036  | 0.0117  |        |
|                |    | Y    | -0.0002 | -0.0193 | -0.0051 | 0.0062  | -0.0004 | -0.0061 |        |
|                |    | Z    | -0.0029 | 0.0188  | -0.0201 | -0.0274 | -0.0140 | -0.0202 |        |
| AT.            | 27 | O X  | -0.0258 | 0.0002  | -0.0033 | -0.0134 | 0.0036  | 0.0117  |        |
|                |    | Y    | 0.0002  | -0.0193 | 0.0051  | -0.0062 | 0.0004  | 0.0061  |        |
|                |    | Z    | -0.0029 | -0.0188 | -0.0201 | -0.0274 | -0.0140 | -0.0202 |        |
| FREQ (CM** -1) |    |      | 285.54  | 291.45  | 294.61  | 295.23  | 301.71  | 312.84  |        |
| AT.            | 1  | CA X | 0.0000  | -0.0099 | 0.0000  | 0.0000  | -0.0191 | 0.0000  |        |
|                |    | Y    | 0.0092  | 0.0000  | -0.0137 | 0.0091  | 0.0000  | -0.0208 |        |
|                |    | Z    | 0.0000  | 0.0007  | 0.0000  | 0.0000  | -0.0002 | 0.0000  |        |
| AT.            | 2  | CA X | 0.0082  | 0.0069  | 0.0174  | -0.0311 | 0.0417  | -0.0071 |        |
|                |    | Y    | 0.0099  | -0.0124 | 0.0082  | -0.0208 | 0.0162  | -0.0055 |        |
|                |    | Z    | 0.0062  | 0.0027  | -0.0054 | -0.0077 | 0.0039  | 0.0044  |        |
| AT.            | 3  | CA X | -0.0082 | 0.0069  | -0.0174 | 0.0311  | 0.0417  | 0.0071  |        |
|                |    | Y    | 0.0099  | 0.0124  | 0.0082  | -0.0208 | -0.0162 | -0.0055 |        |
|                |    | Z    | -0.0062 | 0.0027  | 0.0054  | 0.0077  | 0.0039  | -0.0044 |        |
| AT.            | 4  | CA X | -0.0005 | 0.0032  | -0.0109 | -0.0065 | 0.0008  | 0.0024  |        |
|                |    | Y    | 0.0023  | 0.0021  | 0.0047  | 0.0013  | -0.0027 | 0.0059  |        |
|                |    | Z    | -0.0030 | -0.0072 | -0.0045 | -0.0082 | -0.0113 | 0.0015  |        |
| AT.            | 5  | CA X | 0.0005  | 0.0032  | 0.0109  | 0.0065  | 0.0008  | -0.0024 |        |
|                |    | Y    | 0.0023  | -0.0021 | 0.0047  | 0.0013  | 0.0027  | 0.0059  |        |
|                |    | Z    | 0.0030  | -0.0072 | 0.0045  | 0.0082  | -0.0113 | -0.0015 |        |
| AT.            | 6  | CA X | 0.0000  | -0.0072 | 0.0000  | 0.0000  | 0.0160  | 0.0000  |        |
|                |    | Y    | -0.0129 | 0.0000  | 0.0052  | -0.0036 | 0.0000  | 0.0396  |        |
|                |    | Z    | 0.0000  | -0.0310 | 0.0000  | 0.0000  | 0.0195  | 0.0000  |        |
| AT.            | 7  | CA X | 0.0000  | -0.0049 | 0.0000  | 0.0000  | -0.0195 | 0.0000  |        |
|                |    | Y    | 0.0469  | 0.0000  | -0.0469 | -0.0123 | 0.0000  | 0.0258  |        |
|                |    | Z    | 0.0000  | 0.0028  | 0.0000  | 0.0000  | 0.0088  | 0.0000  |        |
| AT.            | 8  | CA X | -0.0310 | 0.0011  | -0.0238 | -0.0242 | -0.0044 | 0.0009  |        |
|                |    | Y    | -0.0088 | 0.0186  | -0.0142 | -0.0105 | 0.0053  | -0.0066 |        |
|                |    | Z    | 0.0106  | -0.0170 | -0.0058 | -0.0008 | 0.0056  | 0.0093  |        |
| AT.            | 9  | CA X | 0.0310  | 0.0011  | 0.0238  | 0.0242  | -0.0044 | -0.0009 |        |
|                |    | Y    | -0.0088 | -0.0186 | -0.0142 | -0.0105 | -0.0053 | -0.0066 |        |

|     |    |      |         |         |         |         |         |         |
|-----|----|------|---------|---------|---------|---------|---------|---------|
|     |    | Z    | -0.0106 | -0.0170 | 0.0058  | 0.0008  | 0.0056  | -0.0093 |
| AT. | 10 | SI X | 0.0000  | 0.0105  | 0.0000  | 0.0000  | 0.0088  | 0.0000  |
|     |    | Y    | 0.0074  | 0.0000  | -0.0013 | 0.0028  | 0.0000  | -0.0176 |
|     |    | Z    | 0.0000  | -0.0071 | 0.0000  | 0.0000  | 0.0035  | 0.0000  |
| AT. | 11 | SI X | 0.0000  | 0.0024  | 0.0000  | 0.0000  | -0.0192 | 0.0000  |
|     |    | Y    | -0.0133 | 0.0000  | -0.0015 | 0.0140  | 0.0000  | 0.0083  |
|     |    | Z    | 0.0000  | -0.0178 | 0.0000  | 0.0000  | -0.0086 | 0.0000  |
| AT. | 12 | SI X | 0.0000  | -0.0063 | 0.0000  | 0.0000  | -0.0015 | 0.0000  |
|     |    | Y    | -0.0154 | 0.0000  | 0.0118  | 0.0063  | 0.0000  | 0.0053  |
|     |    | Z    | 0.0000  | 0.0139  | 0.0000  | 0.0000  | -0.0080 | 0.0000  |
| AT. | 13 | O X  | 0.0000  | -0.0232 | 0.0000  | 0.0000  | 0.0040  | 0.0000  |
|     |    | Y    | 0.0282  | 0.0000  | 0.0115  | 0.0046  | 0.0000  | -0.0031 |
|     |    | Z    | 0.0000  | -0.0115 | 0.0000  | 0.0000  | 0.0013  | 0.0000  |
| AT. | 14 | O X  | 0.0133  | 0.0132  | 0.0255  | -0.0399 | -0.0362 | 0.0018  |
|     |    | Y    | -0.0089 | 0.0014  | 0.0076  | -0.0053 | -0.0039 | 0.0099  |
|     |    | Z    | 0.0092  | -0.0048 | 0.0061  | -0.0032 | -0.0184 | -0.0050 |
| AT. | 15 | O X  | -0.0133 | 0.0132  | -0.0255 | 0.0399  | -0.0362 | -0.0018 |
|     |    | Y    | -0.0089 | -0.0014 | 0.0076  | -0.0053 | 0.0039  | 0.0099  |
|     |    | Z    | -0.0092 | -0.0048 | -0.0061 | 0.0032  | -0.0184 | 0.0050  |
| AT. | 16 | O X  | 0.0000  | 0.0009  | 0.0000  | 0.0000  | -0.0276 | 0.0000  |
|     |    | Y    | -0.0139 | 0.0000  | -0.0471 | 0.0699  | 0.0000  | 0.0119  |
|     |    | Z    | 0.0000  | -0.0065 | 0.0000  | 0.0000  | 0.0333  | 0.0000  |
| AT. | 17 | O X  | 0.0000  | 0.0145  | 0.0000  | 0.0000  | 0.0282  | 0.0000  |
|     |    | Y    | 0.0203  | 0.0000  | 0.0007  | -0.0045 | 0.0000  | -0.0683 |
|     |    | Z    | 0.0000  | 0.0804  | 0.0000  | 0.0000  | -0.0033 | 0.0000  |
| AT. | 18 | O X  | 0.0000  | -0.0217 | 0.0000  | 0.0000  | -0.0374 | 0.0000  |
|     |    | Y    | -0.0251 | 0.0000  | 0.0199  | 0.0015  | 0.0000  | 0.0350  |
|     |    | Z    | 0.0000  | -0.0125 | 0.0000  | 0.0000  | -0.0047 | 0.0000  |
| AT. | 19 | O X  | 0.0000  | 0.0082  | 0.0000  | 0.0000  | 0.0033  | 0.0000  |
|     |    | Y    | 0.0456  | 0.0000  | 0.0405  | 0.0471  | 0.0000  | -0.0059 |
|     |    | Z    | 0.0000  | -0.0078 | 0.0000  | 0.0000  | 0.0089  | 0.0000  |
| AT. | 20 | O X  | -0.0236 | 0.0119  | -0.0295 | -0.0138 | 0.0072  | -0.0305 |
|     |    | Y    | -0.0028 | 0.0015  | -0.0157 | -0.0039 | -0.0008 | -0.0404 |
|     |    | Z    | -0.0254 | -0.0043 | -0.0129 | -0.0078 | -0.0012 | 0.0165  |
| AT. | 21 | O X  | 0.0236  | 0.0119  | 0.0295  | 0.0138  | 0.0072  | 0.0305  |
|     |    | Y    | -0.0028 | -0.0015 | -0.0157 | -0.0039 | 0.0008  | -0.0404 |
|     |    | Z    | 0.0254  | -0.0043 | 0.0129  | 0.0078  | -0.0012 | -0.0165 |
| AT. | 22 | O X  | 0.0000  | -0.0459 | 0.0000  | 0.0000  | -0.0119 | 0.0000  |
|     |    | Y    | -0.0200 | 0.0000  | 0.0272  | -0.0177 | 0.0000  | 0.0469  |
|     |    | Z    | 0.0000  | 0.0605  | 0.0000  | 0.0000  | 0.0072  | 0.0000  |
| AT. | 23 | O X  | 0.0000  | 0.0010  | 0.0000  | 0.0000  | 0.0032  | 0.0000  |
|     |    | Y    | -0.0058 | 0.0000  | -0.0030 | 0.0024  | 0.0000  | -0.0016 |
|     |    | Z    | 0.0000  | 0.0261  | 0.0000  | 0.0000  | 0.0122  | 0.0000  |
| AT. | 24 | O X  | 0.0000  | 0.0145  | 0.0000  | 0.0000  | -0.0155 | 0.0000  |
|     |    | Y    | -0.0066 | 0.0000  | 0.0218  | -0.0063 | 0.0000  | 0.0025  |
|     |    | Z    | 0.0000  | 0.0220  | 0.0000  | 0.0000  | -0.0128 | 0.0000  |
| AT. | 25 | O X  | 0.0000  | -0.0124 | 0.0000  | 0.0000  | 0.0114  | 0.0000  |
|     |    | Y    | -0.0148 | 0.0000  | 0.0178  | 0.0300  | 0.0000  | -0.0100 |
|     |    | Z    | 0.0000  | 0.0143  | 0.0000  | 0.0000  | -0.0162 | 0.0000  |
| AT. | 26 | O X  | 0.0307  | -0.0039 | -0.0186 | -0.0069 | -0.0053 | 0.0196  |
|     |    | Y    | -0.0362 | -0.0011 | 0.0282  | 0.0086  | 0.0003  | -0.0102 |
|     |    | Z    | 0.0088  | 0.0197  | 0.0100  | -0.0187 | -0.0109 | 0.0038  |
| AT. | 27 | O X  | -0.0307 | -0.0039 | 0.0186  | 0.0069  | -0.0053 | -0.0196 |
|     |    | Y    | -0.0362 | 0.0011  | 0.0282  | 0.0086  | -0.0003 | -0.0102 |
|     |    | Z    | -0.0088 | 0.0197  | -0.0100 | 0.0187  | -0.0109 | -0.0038 |

|               |   |      |         |         |         |         |         |         |
|---------------|---|------|---------|---------|---------|---------|---------|---------|
| FREQ (CM**-1) |   |      | 315.59  | 317.55  | 318.19  | 326.59  | 332.04  | 340.34  |
| AT.           | 1 | CA X | 0.0000  | 0.0000  | -0.0073 | 0.0105  | 0.0077  | 0.0000  |
|               |   | Y    | 0.0252  | -0.0370 | 0.0000  | 0.0000  | 0.0000  | -0.0396 |
|               |   | Z    | 0.0000  | 0.0000  | 0.0040  | 0.0046  | -0.0013 | 0.0000  |
| AT.           | 2 | CA X | -0.0056 | -0.0072 | -0.0062 | -0.0007 | 0.0010  | -0.0162 |
|               |   | Y    | -0.0003 | 0.0017  | -0.0113 | 0.0156  | 0.0070  | 0.0012  |
|               |   | Z    | -0.0008 | 0.0072  | -0.0073 | 0.0140  | 0.0077  | -0.0082 |
| AT.           | 3 | CA X | 0.0056  | 0.0072  | -0.0062 | -0.0007 | 0.0010  | 0.0162  |
|               |   | Y    | -0.0003 | 0.0017  | 0.0113  | -0.0156 | -0.0070 | 0.0012  |
|               |   | Z    | 0.0008  | -0.0072 | -0.0073 | 0.0140  | 0.0077  | 0.0082  |
| AT.           | 4 | CA X | 0.0010  | 0.0004  | 0.0009  | -0.0008 | -0.0206 | 0.0046  |
|               |   | Y    | -0.0002 | 0.0071  | 0.0034  | -0.0119 | 0.0183  | -0.0064 |
|               |   | Z    | -0.0019 | -0.0120 | 0.0013  | 0.0040  | -0.0131 | -0.0025 |
| AT.           | 5 | CA X | -0.0010 | -0.0004 | 0.0009  | -0.0008 | -0.0206 | -0.0046 |
|               |   | Y    | -0.0002 | 0.0071  | -0.0034 | 0.0119  | -0.0183 | -0.0064 |
|               |   | Z    | 0.0019  | 0.0120  | 0.0013  | 0.0040  | -0.0131 | 0.0025  |
| AT.           | 6 | CA X | 0.0000  | 0.0000  | 0.0131  | -0.0280 | -0.0088 | 0.0000  |
|               |   | Y    | -0.0145 | -0.0483 | 0.0000  | 0.0000  | 0.0000  | 0.0085  |
|               |   | Z    | 0.0000  | 0.0000  | 0.0143  | -0.0279 | 0.0089  | 0.0000  |
| AT.           | 7 | CA X | 0.0000  | 0.0000  | 0.0018  | -0.0137 | 0.0192  | 0.0000  |
|               |   | Y    | 0.0006  | 0.0094  | 0.0000  | 0.0000  | 0.0000  | 0.0036  |
|               |   | Z    | 0.0000  | 0.0000  | -0.0164 | -0.0035 | -0.0118 | 0.0000  |

|               |    |    |   |         |         |         |         |         |         |
|---------------|----|----|---|---------|---------|---------|---------|---------|---------|
| AT.           | 8  | CA | X | -0.0005 | -0.0043 | -0.0343 | -0.0038 | 0.0208  | 0.0012  |
|               |    |    | Y | -0.0030 | -0.0049 | -0.0226 | -0.0339 | -0.0090 | -0.0008 |
|               |    |    | Z | 0.0037  | 0.0042  | 0.0074  | 0.0026  | 0.0132  | 0.0042  |
| AT.           | 9  | CA | X | 0.0005  | 0.0043  | -0.0343 | -0.0038 | 0.0208  | -0.0012 |
|               |    |    | Y | -0.0030 | -0.0049 | 0.0226  | 0.0339  | 0.0090  | -0.0008 |
|               |    |    | Z | -0.0037 | -0.0042 | 0.0074  | 0.0026  | 0.0132  | -0.0042 |
| AT.           | 10 | SI | X | 0.0000  | 0.0000  | 0.0241  | 0.0052  | 0.0021  | 0.0000  |
|               |    |    | Y | -0.0079 | 0.0058  | 0.0000  | 0.0000  | 0.0000  | -0.0060 |
|               |    |    | Z | 0.0000  | 0.0000  | -0.0036 | -0.0084 | 0.0061  | 0.0000  |
| AT.           | 11 | SI | X | 0.0000  | 0.0000  | 0.0072  | -0.0077 | 0.0071  | 0.0000  |
|               |    |    | Y | -0.0239 | 0.0133  | 0.0000  | 0.0000  | 0.0000  | 0.0002  |
|               |    |    | Z | 0.0000  | 0.0000  | 0.0009  | -0.0006 | 0.0073  | 0.0000  |
| AT.           | 12 | SI | X | 0.0000  | 0.0000  | -0.0011 | 0.0012  | -0.0018 | 0.0000  |
|               |    |    | Y | 0.0040  | 0.0048  | 0.0000  | 0.0000  | 0.0000  | -0.0123 |
|               |    |    | Z | 0.0000  | 0.0000  | -0.0057 | 0.0029  | -0.0009 | 0.0000  |
| AT.           | 13 | O  | X | 0.0000  | 0.0000  | 0.0247  | 0.0073  | -0.0272 | 0.0000  |
|               |    |    | Y | 0.0330  | 0.0277  | 0.0000  | 0.0000  | 0.0000  | 0.0087  |
|               |    |    | Z | 0.0000  | 0.0000  | -0.0043 | -0.0045 | -0.0013 | 0.0000  |
| AT.           | 14 | O  | X | -0.0303 | 0.0120  | 0.0155  | -0.0077 | 0.0113  | -0.0010 |
|               |    |    | Y | -0.0418 | 0.0236  | 0.0022  | -0.0006 | 0.0083  | 0.0199  |
|               |    |    | Z | 0.0164  | -0.0128 | 0.0019  | -0.0056 | -0.0082 | -0.0245 |
| AT.           | 15 | O  | X | 0.0303  | -0.0120 | 0.0155  | -0.0077 | 0.0113  | 0.0010  |
|               |    |    | Y | -0.0418 | 0.0236  | -0.0022 | 0.0006  | -0.0083 | 0.0199  |
|               |    |    | Z | -0.0164 | 0.0128  | 0.0019  | -0.0056 | -0.0082 | 0.0245  |
| AT.           | 16 | O  | X | 0.0000  | 0.0000  | 0.0064  | -0.0060 | 0.0066  | 0.0000  |
|               |    |    | Y | -0.0073 | 0.0051  | 0.0000  | 0.0000  | 0.0000  | -0.0059 |
|               |    |    | Z | 0.0000  | 0.0000  | -0.0070 | -0.0009 | -0.0090 | 0.0000  |
| AT.           | 17 | O  | X | 0.0000  | 0.0000  | 0.0120  | 0.0483  | 0.0145  | 0.0000  |
|               |    |    | Y | 0.0178  | -0.0505 | 0.0000  | 0.0000  | 0.0000  | 0.1039  |
|               |    |    | Z | 0.0000  | 0.0000  | -0.0252 | 0.0340  | -0.0063 | 0.0000  |
| AT.           | 18 | O  | X | 0.0000  | 0.0000  | 0.0047  | -0.0196 | -0.0203 | 0.0000  |
|               |    |    | Y | 0.0142  | 0.0409  | 0.0000  | 0.0000  | 0.0000  | 0.0259  |
|               |    |    | Z | 0.0000  | 0.0000  | 0.0018  | -0.0012 | 0.0096  | 0.0000  |
| AT.           | 19 | O  | X | 0.0000  | 0.0000  | 0.0325  | 0.0221  | -0.0151 | 0.0000  |
|               |    |    | Y | -0.0383 | -0.0086 | 0.0000  | 0.0000  | 0.0000  | -0.0166 |
|               |    |    | Z | 0.0000  | 0.0000  | -0.0164 | -0.0321 | 0.0302  | 0.0000  |
| AT.           | 20 | O  | X | -0.0008 | 0.0262  | 0.0374  | 0.0101  | 0.0035  | -0.0098 |
|               |    |    | Y | 0.0006  | 0.0311  | 0.0075  | -0.0042 | 0.0048  | -0.0107 |
|               |    |    | Z | -0.0188 | -0.0242 | 0.0057  | 0.0167  | -0.0039 | -0.0053 |
| AT.           | 21 | O  | X | 0.0008  | -0.0262 | 0.0374  | 0.0101  | 0.0035  | 0.0098  |
|               |    |    | Y | 0.0006  | 0.0311  | -0.0075 | 0.0042  | -0.0048 | -0.0107 |
|               |    |    | Z | 0.0188  | 0.0242  | 0.0057  | 0.0167  | -0.0039 | 0.0053  |
| AT.           | 22 | O  | X | 0.0000  | 0.0000  | -0.0514 | 0.0206  | -0.0656 | 0.0000  |
|               |    |    | Y | 0.1009  | 0.0184  | 0.0000  | 0.0000  | 0.0000  | 0.0137  |
|               |    |    | Z | 0.0000  | 0.0000  | 0.0302  | -0.0183 | 0.0194  | 0.0000  |
| AT.           | 23 | O  | X | 0.0000  | 0.0000  | 0.0043  | 0.0034  | 0.0028  | 0.0000  |
|               |    |    | Y | -0.0103 | -0.0082 | 0.0000  | 0.0000  | 0.0000  | 0.0160  |
|               |    |    | Z | 0.0000  | 0.0000  | 0.0231  | -0.0351 | -0.0562 | 0.0000  |
| AT.           | 24 | O  | X | 0.0000  | 0.0000  | -0.0079 | 0.0107  | -0.0144 | 0.0000  |
|               |    |    | Y | 0.0002  | -0.0147 | 0.0000  | 0.0000  | 0.0000  | -0.0212 |
|               |    |    | Z | 0.0000  | 0.0000  | -0.0073 | 0.0084  | -0.0087 | 0.0000  |
| AT.           | 25 | O  | X | 0.0000  | 0.0000  | 0.0002  | 0.0044  | -0.0023 | 0.0000  |
|               |    |    | Y | 0.0005  | -0.0010 | 0.0000  | 0.0000  | 0.0000  | 0.0084  |
|               |    |    | Z | 0.0000  | 0.0000  | -0.0017 | -0.0062 | -0.0013 | 0.0000  |
| AT.           | 26 | O  | X | -0.0001 | -0.0010 | -0.0078 | 0.0108  | 0.0128  | -0.0026 |
|               |    |    | Y | 0.0050  | 0.0050  | 0.0023  | -0.0004 | -0.0065 | -0.0108 |
|               |    |    | Z | 0.0113  | 0.0037  | -0.0075 | 0.0102  | -0.0020 | 0.0043  |
| AT.           | 27 | O  | X | 0.0001  | 0.0010  | -0.0078 | 0.0108  | 0.0128  | 0.0026  |
|               |    |    | Y | 0.0050  | 0.0050  | -0.0023 | 0.0004  | 0.0065  | -0.0108 |
|               |    |    | Z | -0.0113 | -0.0037 | -0.0075 | 0.0102  | -0.0020 | -0.0043 |
| FREQ (CM**-1) |    |    |   | 346.29  | 348.34  | 355.93  | 369.68  | 381.04  | 388.93  |
| AT.           | 1  | CA | X | 0.0000  | 0.0028  | -0.0136 | 0.0051  | 0.0000  | 0.0109  |
|               |    |    | Y | 0.0121  | 0.0000  | 0.0000  | 0.0000  | -0.0021 | 0.0000  |
|               |    |    | Z | 0.0000  | -0.0069 | -0.0026 | -0.0010 | 0.0000  | 0.0047  |
| AT.           | 2  | CA | X | 0.0051  | -0.0117 | -0.0005 | -0.0083 | 0.0020  | -0.0059 |
|               |    |    | Y | 0.0142  | -0.0137 | -0.0142 | 0.0028  | 0.0020  | 0.0125  |
|               |    |    | Z | 0.0104  | -0.0040 | 0.0007  | 0.0027  | -0.0011 | 0.0051  |
| AT.           | 3  | CA | X | -0.0051 | -0.0117 | -0.0005 | -0.0083 | -0.0020 | -0.0059 |
|               |    |    | Y | 0.0142  | 0.0137  | 0.0142  | -0.0028 | 0.0020  | -0.0125 |
|               |    |    | Z | -0.0104 | -0.0040 | 0.0007  | 0.0027  | 0.0011  | 0.0051  |
| AT.           | 4  | CA | X | 0.0035  | 0.0024  | -0.0115 | -0.0022 | 0.0013  | 0.0019  |
|               |    |    | Y | -0.0014 | -0.0116 | 0.0171  | 0.0056  | 0.0001  | -0.0031 |
|               |    |    | Z | 0.0020  | 0.0076  | -0.0127 | -0.0027 | 0.0034  | -0.0000 |
| AT.           | 5  | CA | X | -0.0035 | 0.0024  | -0.0115 | -0.0022 | -0.0013 | 0.0019  |
|               |    |    | Y | -0.0014 | 0.0116  | -0.0171 | -0.0056 | 0.0001  | 0.0031  |
|               |    |    | Z | -0.0020 | 0.0076  | -0.0127 | -0.0027 | -0.0034 | -0.0000 |
| AT.           | 6  | CA | X | 0.0000  | 0.0176  | -0.0040 | -0.0011 | 0.0000  | -0.0112 |

|               |    |      |         |         |         |         |         |         |
|---------------|----|------|---------|---------|---------|---------|---------|---------|
|               |    | Y    | -0.0034 | 0.0000  | 0.0000  | 0.0000  | 0.0102  | 0.0000  |
|               |    | Z    | 0.0000  | 0.0080  | 0.0075  | 0.0043  | 0.0000  | -0.0086 |
| AT.           | 7  | CA X | 0.0000  | -0.0246 | 0.0077  | 0.0016  | 0.0000  | -0.0019 |
|               |    | Y    | 0.0096  | 0.0000  | 0.0000  | 0.0000  | -0.0004 | 0.0000  |
|               |    | Z    | 0.0000  | 0.0095  | -0.0110 | 0.0025  | 0.0000  | 0.0034  |
| AT.           | 8  | CA X | -0.0041 | -0.0024 | 0.0028  | 0.0129  | 0.0016  | 0.0077  |
|               |    | Y    | -0.0038 | 0.0172  | -0.0039 | -0.0030 | 0.0078  | -0.0036 |
|               |    | Z    | 0.0024  | -0.0020 | 0.0059  | -0.0031 | -0.0026 | -0.0104 |
| AT.           | 9  | CA X | 0.0041  | -0.0024 | 0.0028  | 0.0129  | -0.0016 | 0.0077  |
|               |    | Y    | -0.0038 | -0.0172 | 0.0039  | 0.0030  | 0.0078  | 0.0036  |
|               |    | Z    | -0.0024 | -0.0020 | 0.0059  | -0.0031 | 0.0026  | -0.0104 |
| AT.           | 10 | SI X | 0.0000  | -0.0019 | -0.0104 | -0.0075 | 0.0000  | -0.0014 |
|               |    | Y    | -0.0076 | 0.0000  | 0.0000  | 0.0000  | -0.0152 | 0.0000  |
|               |    | Z    | 0.0000  | 0.0040  | 0.0006  | 0.0032  | 0.0000  | 0.0119  |
| AT.           | 11 | SI X | 0.0000  | 0.0051  | -0.0094 | 0.0030  | 0.0000  | 0.0048  |
|               |    | Y    | 0.0008  | 0.0000  | 0.0000  | 0.0000  | 0.0085  | 0.0000  |
|               |    | Z    | 0.0000  | 0.0013  | -0.0036 | 0.0002  | 0.0000  | -0.0127 |
| AT.           | 12 | SI X | 0.0000  | -0.0050 | -0.0008 | -0.0095 | 0.0000  | 0.0036  |
|               |    | Y    | -0.0139 | 0.0000  | 0.0000  | 0.0000  | 0.0016  | 0.0000  |
|               |    | Z    | 0.0000  | -0.0042 | 0.0012  | -0.0029 | 0.0000  | -0.0022 |
| AT.           | 13 | O X  | 0.0000  | -0.0012 | 0.0203  | 0.0235  | 0.0000  | -0.0010 |
|               |    | Y    | -0.0221 | 0.0000  | 0.0000  | 0.0000  | 0.0403  | 0.0000  |
|               |    | Z    | 0.0000  | 0.0019  | 0.0058  | 0.0109  | 0.0000  | 0.0103  |
| AT.           | 14 | O X  | -0.0151 | 0.0189  | -0.0169 | 0.0211  | 0.0254  | 0.0144  |
|               |    | Y    | -0.0046 | 0.0051  | -0.0144 | 0.0105  | 0.0075  | 0.0019  |
|               |    | Z    | -0.0068 | 0.0014  | 0.0114  | -0.0105 | 0.0251  | -0.0084 |
| AT.           | 15 | O X  | 0.0151  | 0.0189  | -0.0169 | 0.0211  | -0.0254 | 0.0144  |
|               |    | Y    | -0.0046 | -0.0051 | 0.0144  | -0.0105 | 0.0075  | -0.0019 |
|               |    | Z    | 0.0068  | 0.0014  | 0.0114  | -0.0105 | -0.0251 | -0.0084 |
| AT.           | 16 | O X  | 0.0000  | 0.0113  | 0.0016  | -0.0005 | 0.0000  | -0.0047 |
|               |    | Y    | -0.0444 | 0.0000  | 0.0000  | 0.0000  | 0.0221  | 0.0000  |
|               |    | Z    | 0.0000  | 0.0042  | -0.0280 | 0.0187  | 0.0000  | 0.0233  |
| AT.           | 17 | O X  | 0.0000  | 0.0874  | 0.0661  | 0.0258  | 0.0000  | 0.0056  |
|               |    | Y    | -0.0070 | 0.0000  | 0.0000  | 0.0000  | -0.0091 | 0.0000  |
|               |    | Z    | 0.0000  | 0.0025  | 0.0032  | -0.0251 | 0.0000  | -0.0489 |
| AT.           | 18 | O X  | 0.0000  | -0.0175 | 0.0279  | -0.0294 | 0.0000  | -0.0228 |
|               |    | Y    | 0.0333  | 0.0000  | 0.0000  | 0.0000  | -0.0346 | 0.0000  |
|               |    | Z    | 0.0000  | 0.0072  | -0.0069 | 0.0022  | 0.0000  | -0.0106 |
| AT.           | 19 | O X  | 0.0000  | -0.0071 | -0.0036 | 0.0137  | 0.0000  | 0.0033  |
|               |    | Y    | 0.0286  | 0.0000  | 0.0000  | 0.0000  | -0.0501 | 0.0000  |
|               |    | Z    | 0.0000  | 0.0100  | -0.0112 | -0.0303 | 0.0000  | -0.0027 |
| AT.           | 20 | O X  | 0.0114  | -0.0054 | -0.0165 | -0.0379 | -0.0143 | -0.0007 |
|               |    | Y    | -0.0046 | -0.0031 | -0.0045 | -0.0198 | -0.0143 | 0.0066  |
|               |    | Z    | 0.0230  | 0.0062  | -0.0047 | 0.0061  | -0.0419 | 0.0023  |
| AT.           | 21 | O X  | -0.0114 | -0.0054 | -0.0165 | -0.0379 | 0.0143  | -0.0007 |
|               |    | Y    | -0.0046 | 0.0031  | 0.0045  | 0.0198  | -0.0143 | -0.0066 |
|               |    | Z    | -0.0230 | 0.0062  | -0.0047 | 0.0061  | 0.0419  | 0.0023  |
| AT.           | 22 | O X  | 0.0000  | -0.0236 | 0.0555  | -0.0135 | 0.0000  | -0.0087 |
|               |    | Y    | 0.0130  | 0.0000  | 0.0000  | 0.0000  | -0.0107 | 0.0000  |
|               |    | Z    | 0.0000  | -0.0489 | 0.0440  | 0.0143  | 0.0000  | 0.0139  |
| AT.           | 23 | O X  | 0.0000  | 0.0065  | 0.0009  | 0.0446  | 0.0000  | -0.0619 |
|               |    | Y    | 0.0001  | 0.0000  | 0.0000  | 0.0000  | -0.0085 | 0.0000  |
|               |    | Z    | 0.0000  | -0.0200 | 0.0240  | 0.0333  | 0.0000  | 0.0611  |
| AT.           | 24 | O X  | 0.0000  | -0.0183 | -0.0159 | 0.0214  | 0.0000  | -0.0118 |
|               |    | Y    | -0.0697 | 0.0000  | 0.0000  | 0.0000  | -0.0354 | 0.0000  |
|               |    | Z    | 0.0000  | -0.0117 | -0.0047 | 0.0116  | 0.0000  | -0.0043 |
| AT.           | 25 | O X  | 0.0000  | -0.0194 | -0.0103 | 0.0211  | 0.0000  | -0.0149 |
|               |    | Y    | 0.0444  | 0.0000  | 0.0000  | 0.0000  | 0.0318  | 0.0000  |
|               |    | Z    | 0.0000  | 0.0154  | 0.0116  | -0.0325 | 0.0000  | 0.0083  |
| AT.           | 26 | O X  | -0.0206 | 0.0104  | 0.0155  | -0.0358 | -0.0113 | 0.0318  |
|               |    | Y    | -0.0064 | -0.0119 | -0.0136 | 0.0202  | 0.0042  | -0.0234 |
|               |    | Z    | -0.0470 | -0.0103 | -0.0020 | 0.0040  | -0.0377 | -0.0031 |
| AT.           | 27 | O X  | 0.0206  | 0.0104  | 0.0155  | -0.0358 | 0.0113  | 0.0318  |
|               |    | Y    | -0.0064 | 0.0119  | 0.0136  | -0.0202 | 0.0042  | 0.0234  |
|               |    | Z    | 0.0470  | -0.0103 | -0.0020 | 0.0040  | 0.0377  | -0.0031 |
| FREQ (CM**-1) |    |      | 394.51  | 412.93  | 437.18  | 448.61  | 454.01  | 457.35  |
| AT.           | 1  | CA X | -0.0209 | 0.0000  | -0.0001 | 0.0033  | -0.0003 | 0.0000  |
|               |    | Y    | 0.0000  | 0.0134  | 0.0000  | 0.0000  | 0.0000  | -0.0008 |
|               |    | Z    | 0.0061  | 0.0000  | 0.0007  | -0.0045 | -0.0009 | 0.0000  |
| AT.           | 2  | CA X | -0.0010 | 0.0014  | -0.0058 | -0.0053 | -0.0010 | 0.0009  |
|               |    | Y    | -0.0127 | 0.0029  | -0.0036 | 0.0059  | 0.0002  | 0.0012  |
|               |    | Z    | -0.0004 | -0.0046 | 0.0002  | -0.0026 | -0.0021 | 0.0032  |
| AT.           | 3  | CA X | -0.0010 | -0.0014 | -0.0058 | -0.0053 | -0.0010 | -0.0009 |
|               |    | Y    | 0.0127  | 0.0029  | 0.0036  | -0.0059 | -0.0002 | 0.0012  |
|               |    | Z    | -0.0004 | 0.0046  | 0.0002  | -0.0026 | -0.0021 | -0.0032 |
| AT.           | 4  | CA X | 0.0001  | -0.0005 | -0.0031 | 0.0029  | -0.0051 | 0.0002  |
|               |    | Y    | 0.0030  | -0.0023 | 0.0034  | -0.0064 | -0.0001 | -0.0069 |

|               |    |      |         |         |         |         |         |         |
|---------------|----|------|---------|---------|---------|---------|---------|---------|
|               |    | Z    | -0.0059 | 0.0036  | -0.0026 | 0.0110  | -0.0004 | 0.0004  |
| AT.           | 5  | CA X | 0.0001  | 0.0005  | -0.0031 | 0.0029  | -0.0051 | -0.0002 |
|               |    | Y    | -0.0030 | -0.0023 | -0.0034 | 0.0064  | 0.0001  | -0.0069 |
|               |    | Z    | -0.0059 | -0.0036 | -0.0026 | 0.0110  | -0.0004 | -0.0004 |
| AT.           | 6  | CA X | 0.0036  | 0.0000  | -0.0079 | 0.0047  | -0.0073 | 0.0000  |
|               |    | Y    | 0.0000  | 0.0044  | 0.0000  | 0.0000  | 0.0000  | -0.0088 |
|               |    | Z    | 0.0156  | 0.0000  | 0.0093  | -0.0009 | -0.0088 | 0.0000  |
| AT.           | 7  | CA X | 0.0076  | 0.0000  | 0.0052  | -0.0059 | -0.0069 | 0.0000  |
|               |    | Y    | 0.0000  | -0.0018 | 0.0000  | 0.0000  | 0.0000  | -0.0073 |
|               |    | Z    | -0.0084 | 0.0000  | -0.0107 | 0.0096  | 0.0015  | 0.0000  |
| AT.           | 8  | CA X | -0.0012 | 0.0017  | -0.0006 | -0.0052 | -0.0063 | -0.0022 |
|               |    | Y    | -0.0018 | 0.0006  | -0.0033 | 0.0054  | -0.0035 | -0.0045 |
|               |    | Z    | 0.0056  | -0.0048 | -0.0021 | -0.0038 | -0.0023 | -0.0002 |
| AT.           | 9  | CA X | -0.0012 | -0.0017 | -0.0006 | -0.0052 | -0.0063 | 0.0022  |
|               |    | Y    | 0.0018  | 0.0006  | 0.0033  | -0.0054 | 0.0035  | -0.0045 |
|               |    | Z    | 0.0056  | 0.0048  | -0.0021 | -0.0038 | -0.0023 | 0.0002  |
| AT.           | 10 | SI X | 0.0017  | 0.0000  | 0.0052  | 0.0026  | -0.0020 | 0.0000  |
|               |    | Y    | 0.0000  | -0.0010 | 0.0000  | 0.0000  | 0.0000  | 0.0024  |
|               |    | Z    | -0.0071 | 0.0000  | 0.0013  | -0.0066 | 0.0120  | 0.0000  |
| AT.           | 11 | SI X | 0.0102  | 0.0000  | -0.0064 | -0.0025 | 0.0102  | 0.0000  |
|               |    | Y    | 0.0000  | -0.0030 | 0.0000  | 0.0000  | 0.0000  | 0.0031  |
|               |    | Z    | 0.0034  | 0.0000  | -0.0020 | -0.0037 | -0.0025 | 0.0000  |
| AT.           | 12 | SI X | 0.0042  | 0.0000  | -0.0109 | -0.0016 | -0.0011 | 0.0000  |
|               |    | Y    | 0.0000  | 0.0173  | 0.0000  | 0.0000  | 0.0000  | 0.0012  |
|               |    | Z    | -0.0066 | 0.0000  | 0.0067  | -0.0235 | 0.0133  | 0.0000  |
| AT.           | 13 | O X  | 0.0244  | 0.0000  | -0.0384 | -0.0097 | -0.0219 | 0.0000  |
|               |    | Y    | 0.0000  | 0.0232  | 0.0000  | 0.0000  | 0.0000  | -0.0172 |
|               |    | Z    | -0.0019 | 0.0000  | -0.0082 | -0.0162 | 0.0046  | 0.0000  |
| AT.           | 14 | O X  | 0.0260  | -0.0294 | 0.0147  | 0.0094  | 0.0040  | 0.0080  |
|               |    | Y    | 0.0219  | -0.0092 | 0.0086  | 0.0004  | 0.0018  | 0.0014  |
|               |    | Z    | -0.0284 | -0.0310 | -0.0067 | -0.0007 | -0.0120 | 0.0125  |
| AT.           | 15 | O X  | 0.0260  | 0.0294  | 0.0147  | 0.0094  | 0.0040  | -0.0080 |
|               |    | Y    | -0.0219 | -0.0092 | -0.0086 | -0.0004 | -0.0018 | 0.0014  |
|               |    | Z    | -0.0284 | 0.0310  | -0.0067 | -0.0007 | -0.0120 | -0.0125 |
| AT.           | 16 | O X  | 0.0067  | 0.0000  | -0.0005 | -0.0057 | 0.0044  | 0.0000  |
|               |    | Y    | 0.0000  | -0.0412 | 0.0000  | 0.0000  | 0.0000  | 0.0110  |
|               |    | Z    | 0.0369  | 0.0000  | 0.0117  | 0.0181  | 0.0195  | 0.0000  |
| AT.           | 17 | O X  | -0.0291 | 0.0000  | 0.0288  | 0.0099  | -0.0232 | 0.0000  |
|               |    | Y    | 0.0000  | -0.0187 | 0.0000  | 0.0000  | 0.0000  | -0.0088 |
|               |    | Z    | 0.0418  | 0.0000  | 0.0023  | -0.0339 | -0.0090 | 0.0000  |
| AT.           | 18 | O X  | -0.0407 | 0.0000  | -0.0186 | -0.0078 | -0.0189 | 0.0000  |
|               |    | Y    | 0.0000  | 0.0477  | 0.0000  | 0.0000  | 0.0000  | -0.0209 |
|               |    | Z    | 0.0137  | 0.0000  | 0.0032  | -0.0093 | 0.0026  | 0.0000  |
| AT.           | 19 | O X  | 0.0084  | 0.0000  | -0.0208 | -0.0121 | 0.0113  | 0.0000  |
|               |    | Y    | 0.0000  | -0.0288 | 0.0000  | 0.0000  | 0.0000  | -0.0019 |
|               |    | Z    | -0.0191 | 0.0000  | 0.0436  | 0.0168  | 0.0090  | 0.0000  |
| AT.           | 20 | O X  | -0.0086 | -0.0148 | 0.0323  | 0.0060  | 0.0034  | -0.0078 |
|               |    | Y    | -0.0123 | -0.0047 | 0.0239  | -0.0052 | 0.0041  | 0.0068  |
|               |    | Z    | 0.0042  | -0.0304 | -0.0159 | 0.0053  | -0.0093 | 0.0030  |
| AT.           | 21 | O X  | -0.0086 | 0.0148  | 0.0323  | 0.0060  | 0.0034  | 0.0078  |
|               |    | Y    | 0.0123  | -0.0047 | -0.0239 | 0.0052  | -0.0041 | 0.0068  |
|               |    | Z    | 0.0042  | 0.0304  | -0.0159 | 0.0053  | -0.0093 | -0.0030 |
| AT.           | 22 | O X  | 0.0394  | 0.0000  | 0.0471  | 0.0337  | 0.0234  | 0.0000  |
|               |    | Y    | 0.0000  | -0.0566 | 0.0000  | 0.0000  | 0.0000  | 0.0222  |
|               |    | Z    | -0.0031 | 0.0000  | -0.0205 | 0.0778  | 0.0055  | 0.0000  |
| AT.           | 23 | O X  | -0.0333 | 0.0000  | -0.0084 | 0.0032  | 0.0900  | 0.0000  |
|               |    | Y    | 0.0000  | 0.0321  | 0.0000  | 0.0000  | 0.0000  | 0.1103  |
|               |    | Z    | -0.0199 | 0.0000  | 0.0270  | -0.0501 | 0.0124  | 0.0000  |
| AT.           | 24 | O X  | -0.0181 | 0.0000  | 0.0136  | 0.0127  | -0.0295 | 0.0000  |
|               |    | Y    | 0.0000  | -0.0021 | 0.0000  | 0.0000  | 0.0000  | -0.0289 |
|               |    | Z    | -0.0195 | 0.0000  | 0.0123  | -0.0154 | 0.0026  | 0.0000  |
| AT.           | 25 | O X  | -0.0050 | 0.0000  | 0.0212  | -0.0160 | -0.0075 | 0.0000  |
|               |    | Y    | 0.0000  | -0.0106 | 0.0000  | 0.0000  | 0.0000  | -0.0104 |
|               |    | Z    | 0.0043  | 0.0000  | -0.0250 | 0.0006  | 0.0281  | 0.0000  |
| AT.           | 26 | O X  | 0.0095  | 0.0162  | -0.0219 | -0.0031 | 0.0207  | 0.0142  |
|               |    | Y    | -0.0036 | 0.0068  | 0.0086  | 0.0078  | -0.0139 | 0.0048  |
|               |    | Z    | 0.0016  | -0.0004 | 0.0057  | 0.0121  | -0.0153 | 0.0016  |
| AT.           | 27 | O X  | 0.0095  | -0.0162 | -0.0219 | -0.0031 | 0.0207  | -0.0142 |
|               |    | Y    | 0.0036  | 0.0068  | -0.0086 | -0.0078 | 0.0139  | 0.0048  |
|               |    | Z    | 0.0016  | 0.0004  | 0.0057  | 0.0121  | -0.0153 | -0.0016 |
| FREQ (CM**-1) |    |      | 494.36  | 497.22  | 504.32  | 508.48  | 527.63  | 529.81  |
| AT.           | 1  | CA X | 0.0019  | 0.0000  | 0.0027  | -0.0074 | 0.0000  | 0.0014  |
|               |    | Y    | 0.0000  | -0.0106 | 0.0000  | 0.0000  | -0.0045 | 0.0000  |
|               |    | Z    | -0.0040 | 0.0000  | 0.0023  | -0.0016 | 0.0000  | 0.0025  |
| AT.           | 2  | CA X | -0.0015 | -0.0051 | 0.0020  | 0.0044  | -0.0027 | -0.0043 |
|               |    | Y    | -0.0022 | 0.0012  | 0.0056  | -0.0016 | -0.0016 | -0.0047 |
|               |    | Z    | -0.0022 | 0.0001  | 0.0021  | -0.0031 | 0.0002  | 0.0042  |

|               |    |    |   |         |         |         |         |         |         |
|---------------|----|----|---|---------|---------|---------|---------|---------|---------|
| AT.           | 3  | CA | X | -0.0015 | 0.0051  | 0.0020  | 0.0044  | 0.0027  | -0.0043 |
|               |    |    | Y | 0.0022  | 0.0012  | -0.0056 | 0.0016  | -0.0016 | 0.0047  |
|               |    |    | Z | -0.0022 | -0.0001 | 0.0021  | -0.0031 | -0.0002 | 0.0042  |
| AT.           | 4  | CA | X | 0.0049  | -0.0025 | 0.0017  | -0.0008 | 0.0083  | -0.0029 |
|               |    |    | Y | -0.0064 | 0.0002  | -0.0007 | -0.0003 | -0.0004 | 0.0012  |
|               |    |    | Z | 0.0042  | -0.0046 | -0.0052 | 0.0028  | 0.0003  | -0.0012 |
| AT.           | 5  | CA | X | 0.0049  | 0.0025  | 0.0017  | -0.0008 | -0.0083 | -0.0029 |
|               |    |    | Y | 0.0064  | 0.0002  | 0.0007  | 0.0003  | -0.0004 | -0.0012 |
|               |    |    | Z | 0.0042  | 0.0046  | -0.0052 | 0.0028  | -0.0003 | -0.0012 |
| AT.           | 6  | CA | X | 0.0009  | 0.0000  | 0.0028  | -0.0031 | 0.0000  | -0.0044 |
|               |    |    | Y | 0.0000  | -0.0026 | 0.0000  | 0.0000  | -0.0010 | 0.0000  |
|               |    |    | Z | -0.0051 | 0.0000  | 0.0065  | -0.0036 | 0.0000  | 0.0006  |
| AT.           | 7  | CA | X | -0.0073 | 0.0000  | -0.0026 | 0.0014  | 0.0000  | 0.0030  |
|               |    |    | Y | 0.0000  | -0.0010 | 0.0000  | 0.0000  | 0.0102  | 0.0000  |
|               |    |    | Z | 0.0017  | 0.0000  | 0.0014  | 0.0101  | 0.0000  | -0.0001 |
| AT.           | 8  | CA | X | 0.0004  | -0.0031 | -0.0004 | 0.0053  | -0.0018 | 0.0045  |
|               |    |    | Y | 0.0036  | 0.0005  | 0.0048  | 0.0015  | 0.0009  | 0.0046  |
|               |    |    | Z | -0.0056 | -0.0002 | 0.0001  | 0.0004  | 0.0034  | -0.0020 |
| AT.           | 9  | CA | X | 0.0004  | 0.0031  | -0.0004 | 0.0053  | 0.0018  | 0.0045  |
|               |    |    | Y | -0.0036 | 0.0005  | -0.0048 | -0.0015 | 0.0009  | -0.0046 |
|               |    |    | Z | -0.0056 | 0.0002  | 0.0001  | 0.0004  | -0.0034 | -0.0020 |
| AT.           | 10 | SI | X | -0.0047 | 0.0000  | -0.0249 | -0.0259 | 0.0000  | -0.0240 |
|               |    |    | Y | 0.0000  | 0.0231  | 0.0000  | 0.0000  | 0.0019  | 0.0000  |
|               |    |    | Z | 0.0152  | 0.0000  | 0.0131  | -0.0159 | 0.0000  | -0.0169 |
| AT.           | 11 | SI | X | 0.0125  | 0.0000  | -0.0202 | -0.0183 | 0.0000  | 0.0289  |
|               |    |    | Y | 0.0000  | 0.0359  | 0.0000  | 0.0000  | 0.0184  | 0.0000  |
|               |    |    | Z | 0.0369  | 0.0000  | 0.0105  | -0.0036 | 0.0000  | -0.0045 |
| AT.           | 12 | SI | X | -0.0005 | 0.0000  | -0.0182 | -0.0080 | 0.0000  | 0.0065  |
|               |    |    | Y | 0.0000  | 0.0218  | 0.0000  | 0.0000  | -0.0388 | 0.0000  |
|               |    |    | Z | 0.0184  | 0.0000  | -0.0262 | 0.0253  | 0.0000  | -0.0118 |
| AT.           | 13 | O  | X | -0.0036 | 0.0000  | 0.0111  | 0.0300  | 0.0000  | 0.0326  |
|               |    |    | Y | 0.0000  | -0.0131 | 0.0000  | 0.0000  | 0.0051  | 0.0000  |
|               |    |    | Z | 0.0129  | 0.0000  | 0.0237  | -0.0064 | 0.0000  | -0.0023 |
| AT.           | 14 | O  | X | -0.0213 | -0.0318 | 0.0090  | 0.0229  | -0.0192 | -0.0249 |
|               |    |    | Y | 0.0125  | 0.0152  | 0.0259  | 0.0119  | 0.0040  | -0.0245 |
|               |    |    | Z | -0.0310 | 0.0194  | -0.0087 | 0.0121  | 0.0074  | -0.0076 |
| AT.           | 15 | O  | X | -0.0213 | 0.0318  | 0.0090  | 0.0229  | 0.0192  | -0.0249 |
|               |    |    | Y | -0.0125 | 0.0152  | -0.0259 | -0.0119 | 0.0040  | 0.0245  |
|               |    |    | Z | -0.0310 | -0.0194 | -0.0087 | 0.0121  | -0.0074 | -0.0076 |
| AT.           | 16 | O  | X | 0.0236  | 0.0000  | -0.0153 | -0.0236 | 0.0000  | 0.0285  |
|               |    |    | Y | 0.0000  | -0.0466 | 0.0000  | 0.0000  | -0.0278 | 0.0000  |
|               |    |    | Z | -0.0286 | 0.0000  | -0.0175 | 0.0088  | 0.0000  | 0.0065  |
| AT.           | 17 | O  | X | 0.0080  | 0.0000  | -0.0041 | -0.0028 | 0.0000  | -0.0023 |
|               |    |    | Y | 0.0000  | 0.0033  | 0.0000  | 0.0000  | -0.0189 | 0.0000  |
|               |    |    | Z | -0.0087 | 0.0000  | 0.0059  | -0.0044 | 0.0000  | -0.0061 |
| AT.           | 18 | O  | X | -0.0029 | 0.0000  | 0.0188  | 0.0075  | 0.0000  | -0.0310 |
|               |    |    | Y | 0.0000  | -0.0408 | 0.0000  | 0.0000  | -0.0155 | 0.0000  |
|               |    |    | Z | 0.0401  | 0.0000  | 0.0131  | -0.0161 | 0.0000  | 0.0090  |
| AT.           | 19 | O  | X | 0.0076  | 0.0000  | 0.0047  | -0.0280 | 0.0000  | -0.0314 |
|               |    |    | Y | 0.0000  | -0.0194 | 0.0000  | 0.0000  | -0.0128 | 0.0000  |
|               |    |    | Z | -0.0130 | 0.0000  | -0.0279 | -0.0164 | 0.0000  | -0.0092 |
| AT.           | 20 | O  | X | 0.0013  | -0.0176 | 0.0123  | 0.0164  | -0.0068 | 0.0223  |
|               |    |    | Y | 0.0088  | 0.0073  | 0.0293  | 0.0165  | 0.0016  | 0.0218  |
|               |    |    | Z | -0.0091 | 0.0088  | -0.0102 | 0.0202  | -0.0052 | 0.0198  |
| AT.           | 21 | O  | X | 0.0013  | 0.0176  | 0.0123  | 0.0164  | 0.0068  | 0.0223  |
|               |    |    | Y | -0.0088 | 0.0073  | -0.0293 | -0.0165 | 0.0016  | -0.0218 |
|               |    |    | Z | -0.0091 | -0.0088 | -0.0102 | 0.0202  | 0.0052  | 0.0198  |
| AT.           | 22 | O  | X | 0.0052  | 0.0000  | -0.0019 | -0.0023 | 0.0000  | -0.0046 |
|               |    |    | Y | 0.0000  | 0.0070  | 0.0000  | 0.0000  | -0.0038 | 0.0000  |
|               |    |    | Z | 0.0324  | 0.0000  | -0.0041 | 0.0117  | 0.0000  | -0.0044 |
| AT.           | 23 | O  | X | -0.0212 | 0.0000  | 0.0203  | 0.0023  | 0.0000  | 0.0127  |
|               |    |    | Y | 0.0000  | -0.0259 | 0.0000  | 0.0000  | 0.0272  | 0.0000  |
|               |    |    | Z | -0.0115 | 0.0000  | 0.0025  | -0.0157 | 0.0000  | 0.0083  |
| AT.           | 24 | O  | X | -0.0079 | 0.0000  | 0.0159  | -0.0150 | 0.0000  | 0.0043  |
|               |    |    | Y | 0.0000  | -0.0199 | 0.0000  | 0.0000  | 0.0501  | 0.0000  |
|               |    |    | Z | 0.0191  | 0.0000  | -0.0133 | 0.0239  | 0.0000  | -0.0076 |
| AT.           | 25 | O  | X | 0.0249  | 0.0000  | -0.0279 | 0.0270  | 0.0000  | -0.0059 |
|               |    |    | Y | 0.0000  | -0.0155 | 0.0000  | 0.0000  | 0.0354  | 0.0000  |
|               |    |    | Z | -0.0112 | 0.0000  | -0.0105 | -0.0090 | 0.0000  | 0.0063  |
| AT.           | 26 | O  | X | -0.0056 | 0.0168  | 0.0098  | 0.0003  | -0.0357 | -0.0020 |
|               |    |    | Y | -0.0045 | 0.0055  | -0.0100 | -0.0121 | -0.0118 | 0.0096  |
|               |    |    | Z | -0.0180 | -0.0027 | 0.0281  | -0.0295 | 0.0125  | 0.0108  |
| AT.           | 27 | O  | X | -0.0056 | -0.0168 | 0.0098  | 0.0003  | 0.0357  | -0.0020 |
|               |    |    | Y | 0.0045  | 0.0055  | 0.0100  | 0.0121  | -0.0118 | -0.0096 |
|               |    |    | Z | -0.0180 | 0.0027  | 0.0281  | -0.0295 | -0.0125 | 0.0108  |
| FREQ (CM**-1) |    |    |   | 531.69  | 534.06  | 545.60  | 821.03  | 855.84  | 864.72  |
| AT.           | 1  | CA | X | -0.0018 | 0.0000  | 0.0053  | 0.0004  | -0.0015 | -0.0003 |



|     |    |      |         |         |         |         |         |         |
|-----|----|------|---------|---------|---------|---------|---------|---------|
|     |    | Y    | 0.0000  | 0.0048  | 0.0000  | 0.0000  | 0.0000  | 0.0000  |
|     |    | Z    | 0.0097  | 0.0000  | -0.0038 | -0.0001 | 0.0012  | -0.0005 |
| AT. | 2  | CA X | 0.0016  | 0.0032  | -0.0032 | -0.0002 | 0.0003  | 0.0006  |
|     |    | Y    | -0.0015 | -0.0002 | -0.0044 | 0.0000  | -0.0005 | -0.0007 |
|     |    | Z    | 0.0027  | 0.0028  | -0.0067 | -0.0005 | 0.0006  | -0.0012 |
| AT. | 3  | CA X | 0.0016  | -0.0032 | -0.0032 | -0.0002 | 0.0003  | 0.0006  |
|     |    | Y    | 0.0015  | -0.0002 | 0.0044  | -0.0000 | 0.0005  | 0.0007  |
|     |    | Z    | 0.0027  | -0.0028 | -0.0067 | -0.0005 | 0.0006  | -0.0012 |
| AT. | 4  | CA X | 0.0032  | 0.0019  | 0.0052  | -0.0004 | 0.0003  | 0.0002  |
|     |    | Y    | 0.0061  | -0.0002 | 0.0021  | 0.0003  | -0.0008 | -0.0002 |
|     |    | Z    | -0.0002 | -0.0022 | 0.0026  | 0.0007  | -0.0005 | 0.0001  |
| AT. | 5  | CA X | 0.0032  | -0.0019 | 0.0052  | -0.0004 | 0.0003  | 0.0002  |
|     |    | Y    | -0.0061 | -0.0002 | -0.0021 | -0.0003 | 0.0008  | 0.0002  |
|     |    | Z    | -0.0002 | 0.0022  | 0.0026  | 0.0007  | -0.0005 | 0.0001  |
| AT. | 6  | CA X | 0.0051  | 0.0000  | 0.0028  | 0.0002  | -0.0005 | 0.0008  |
|     |    | Y    | 0.0000  | -0.0099 | 0.0000  | 0.0000  | 0.0000  | 0.0000  |
|     |    | Z    | 0.0020  | 0.0000  | 0.0130  | -0.0006 | -0.0003 | 0.0015  |
| AT. | 7  | CA X | -0.0024 | 0.0000  | -0.0018 | 0.0007  | -0.0009 | -0.0002 |
|     |    | Y    | 0.0000  | 0.0022  | 0.0000  | 0.0000  | 0.0000  | 0.0000  |
|     |    | Z    | -0.0010 | 0.0000  | 0.0012  | 0.0010  | -0.0007 | 0.0007  |
| AT. | 8  | CA X | -0.0028 | -0.0081 | 0.0005  | -0.0004 | 0.0007  | -0.0002 |
|     |    | Y    | -0.0016 | 0.0001  | -0.0022 | 0.0004  | 0.0001  | 0.0000  |
|     |    | Z    | -0.0056 | -0.0008 | 0.0041  | -0.0007 | -0.0003 | 0.0006  |
| AT. | 9  | CA X | -0.0028 | 0.0081  | 0.0005  | -0.0004 | 0.0007  | -0.0002 |
|     |    | Y    | 0.0016  | 0.0001  | 0.0022  | -0.0004 | -0.0001 | -0.0000 |
|     |    | Z    | -0.0056 | 0.0008  | 0.0041  | -0.0007 | -0.0003 | 0.0006  |
| AT. | 10 | SI X | 0.0128  | 0.0000  | -0.0034 | -0.0003 | -0.0060 | -0.0010 |
|     |    | Y    | 0.0000  | 0.0418  | 0.0000  | 0.0000  | 0.0000  | 0.0000  |
|     |    | Z    | -0.0259 | 0.0000  | 0.0138  | 0.0005  | -0.0059 | -0.0002 |
| AT. | 11 | SI X | 0.0018  | 0.0000  | 0.0151  | 0.0009  | -0.0025 | -0.0194 |
|     |    | Y    | 0.0000  | -0.0151 | 0.0000  | 0.0000  | 0.0000  | 0.0000  |
|     |    | Z    | 0.0108  | 0.0000  | -0.0136 | -0.0131 | -0.0041 | -0.0143 |
| AT. | 12 | SI X | -0.0303 | 0.0000  | -0.0307 | -0.0019 | 0.0013  | -0.0118 |
|     |    | Y    | 0.0000  | -0.0049 | 0.0000  | 0.0000  | 0.0000  | 0.0000  |
|     |    | Z    | -0.0036 | 0.0000  | 0.0005  | -0.0014 | -0.0004 | -0.0046 |
| AT. | 13 | O X  | 0.0014  | 0.0000  | -0.0042 | -0.0003 | 0.0098  | -0.0006 |
|     |    | Y    | 0.0000  | -0.0390 | 0.0000  | 0.0000  | 0.0000  | 0.0000  |
|     |    | Z    | -0.0283 | 0.0000  | 0.0178  | -0.0019 | -0.0386 | -0.0012 |
| AT. | 14 | O X  | -0.0082 | 0.0149  | -0.0071 | 0.0167  | -0.0010 | -0.0006 |
|     |    | Y    | 0.0089  | -0.0060 | -0.0279 | -0.0345 | 0.0010  | 0.0014  |
|     |    | Z    | -0.0118 | -0.0083 | 0.0152  | -0.0135 | 0.0002  | 0.0010  |
| AT. | 15 | O X  | -0.0082 | -0.0149 | -0.0071 | 0.0167  | -0.0010 | -0.0006 |
|     |    | Y    | -0.0089 | -0.0060 | 0.0279  | 0.0345  | -0.0010 | -0.0014 |
|     |    | Z    | -0.0118 | 0.0083  | 0.0152  | -0.0135 | 0.0002  | 0.0010  |
| AT. | 16 | O X  | 0.0054  | 0.0000  | 0.0093  | -0.0454 | 0.0048  | 0.0333  |
|     |    | Y    | 0.0000  | 0.0230  | 0.0000  | 0.0000  | 0.0000  | 0.0000  |
|     |    | Z    | -0.0142 | 0.0000  | 0.0247  | -0.0071 | 0.0001  | 0.0064  |
| AT. | 17 | O X  | -0.0080 | 0.0000  | -0.0073 | -0.0005 | -0.0001 | -0.0022 |
|     |    | Y    | 0.0000  | -0.0003 | 0.0000  | 0.0000  | 0.0000  | 0.0000  |
|     |    | Z    | -0.0092 | 0.0000  | 0.0114  | 0.0011  | -0.0002 | -0.0014 |
| AT. | 18 | O X  | 0.0058  | 0.0000  | -0.0179 | 0.0081  | 0.0004  | 0.0030  |
|     |    | Y    | 0.0000  | 0.0246  | 0.0000  | 0.0000  | 0.0000  | 0.0000  |
|     |    | Z    | 0.0144  | 0.0000  | -0.0174 | 0.0575  | 0.0052  | 0.0155  |
| AT. | 19 | O X  | -0.0187 | 0.0000  | 0.0196  | -0.0005 | 0.0472  | 0.0018  |
|     |    | Y    | 0.0000  | -0.0479 | 0.0000  | 0.0000  | 0.0000  | 0.0000  |
|     |    | Z    | 0.0250  | 0.0000  | -0.0159 | -0.0006 | 0.0286  | 0.0001  |
| AT. | 20 | O X  | -0.0031 | -0.0398 | -0.0024 | -0.0005 | -0.0237 | -0.0007 |
|     |    | Y    | -0.0241 | 0.0124  | 0.0080  | -0.0011 | 0.0357  | -0.0008 |
|     |    | Z    | 0.0243  | 0.0108  | -0.0184 | -0.0002 | 0.0094  | -0.0003 |
| AT. | 21 | O X  | -0.0031 | 0.0398  | -0.0024 | -0.0005 | -0.0237 | -0.0007 |
|     |    | Y    | 0.0241  | 0.0124  | -0.0080 | 0.0011  | -0.0357 | 0.0008  |
|     |    | Z    | 0.0243  | -0.0108 | -0.0184 | -0.0002 | 0.0094  | -0.0003 |
| AT. | 22 | O X  | -0.0003 | 0.0000  | -0.0004 | 0.0002  | -0.0002 | -0.0019 |
|     |    | Y    | 0.0000  | -0.0033 | 0.0000  | 0.0000  | 0.0000  | 0.0000  |
|     |    | Z    | -0.0070 | 0.0000  | 0.0053  | -0.0004 | 0.0014  | 0.0014  |
| AT. | 23 | O X  | 0.0127  | 0.0000  | -0.0060 | -0.0012 | -0.0017 | -0.0028 |
|     |    | Y    | 0.0000  | -0.0114 | 0.0000  | 0.0000  | 0.0000  | 0.0000  |
|     |    | Z    | 0.0122  | 0.0000  | -0.0246 | -0.0019 | -0.0028 | 0.0003  |
| AT. | 24 | O X  | 0.0199  | 0.0000  | 0.0207  | -0.0016 | 0.0012  | -0.0139 |
|     |    | Y    | 0.0000  | 0.0011  | 0.0000  | 0.0000  | 0.0000  | 0.0000  |
|     |    | Z    | 0.0200  | 0.0000  | 0.0222  | 0.0038  | -0.0010 | 0.0349  |
| AT. | 25 | O X  | -0.0072 | 0.0000  | 0.0076  | 0.0013  | 0.0019  | -0.0169 |
|     |    | Y    | 0.0000  | 0.0142  | 0.0000  | 0.0000  | 0.0000  | 0.0000  |
|     |    | Z    | -0.0270 | 0.0000  | -0.0335 | -0.0012 | 0.0013  | -0.0183 |
| AT. | 26 | O X  | 0.0150  | -0.0082 | 0.0060  | 0.0018  | -0.0032 | 0.0254  |
|     |    | Y    | -0.0330 | -0.0018 | -0.0280 | 0.0023  | -0.0036 | 0.0357  |
|     |    | Z    | 0.0077  | -0.0047 | -0.0008 | -0.0017 | -0.0002 | -0.0064 |
| AT. | 27 | O X  | 0.0150  | 0.0082  | 0.0060  | 0.0018  | -0.0032 | 0.0254  |
|     |    | Y    | 0.0330  | -0.0018 | 0.0280  | -0.0023 | 0.0036  | -0.0357 |

|               |    |      |         |         |         |         |         |         |
|---------------|----|------|---------|---------|---------|---------|---------|---------|
|               |    | Z    | 0.0077  | 0.0047  | -0.0008 | -0.0017 | -0.0002 | -0.0064 |
| FREQ (CM**-1) |    |      | 872.29  | 892.14  | 906.89  | 909.69  | 915.13  | 929.03  |
| AT.           | 1  | CA X | 0.0005  | 0.0000  | 0.0003  | 0.0002  | 0.0000  | 0.0003  |
|               |    | Y    | 0.0000  | -0.0008 | 0.0000  | 0.0000  | 0.0006  | 0.0000  |
|               |    | Z    | -0.0000 | 0.0000  | -0.0006 | -0.0003 | 0.0000  | -0.0002 |
| AT.           | 2  | CA X | 0.0005  | -0.0007 | -0.0007 | -0.0002 | 0.0003  | 0.0005  |
|               |    | Y    | 0.0015  | -0.0001 | 0.0001  | -0.0001 | 0.0000  | -0.0002 |
|               |    | Z    | 0.0004  | -0.0001 | -0.0006 | 0.0005  | -0.0006 | 0.0002  |
| AT.           | 3  | CA X | 0.0005  | 0.0007  | -0.0007 | -0.0002 | -0.0003 | 0.0005  |
|               |    | Y    | -0.0015 | -0.0001 | -0.0001 | 0.0001  | 0.0000  | 0.0002  |
|               |    | Z    | 0.0004  | 0.0001  | -0.0006 | 0.0005  | 0.0006  | 0.0002  |
| AT.           | 4  | CA X | -0.0000 | -0.0001 | 0.0001  | -0.0004 | -0.0005 | -0.0004 |
|               |    | Y    | -0.0001 | 0.0001  | -0.0001 | 0.0001  | -0.0001 | 0.0002  |
|               |    | Z    | 0.0002  | -0.0008 | 0.0009  | -0.0002 | 0.0008  | 0.0000  |
| AT.           | 5  | CA X | -0.0000 | 0.0001  | 0.0001  | -0.0004 | 0.0005  | -0.0004 |
|               |    | Y    | 0.0001  | 0.0001  | 0.0001  | -0.0001 | -0.0001 | -0.0002 |
|               |    | Z    | 0.0002  | 0.0008  | 0.0009  | -0.0002 | -0.0008 | 0.0000  |
| AT.           | 6  | CA X | -0.0015 | 0.0000  | -0.0014 | -0.0002 | 0.0000  | 0.0002  |
|               |    | Y    | 0.0000  | 0.0001  | 0.0000  | 0.0000  | 0.0006  | 0.0000  |
|               |    | Z    | -0.0025 | 0.0000  | 0.0004  | 0.0001  | 0.0000  | -0.0005 |
| AT.           | 7  | CA X | -0.0000 | 0.0000  | 0.0002  | 0.0004  | 0.0000  | 0.0003  |
|               |    | Y    | 0.0000  | -0.0000 | 0.0000  | 0.0000  | -0.0008 | 0.0000  |
|               |    | Z    | 0.0017  | 0.0000  | 0.0001  | 0.0004  | 0.0000  | 0.0001  |
| AT.           | 8  | CA X | 0.0005  | 0.0001  | 0.0004  | 0.0009  | 0.0002  | -0.0002 |
|               |    | Y    | -0.0010 | -0.0002 | -0.0009 | 0.0005  | -0.0001 | 0.0004  |
|               |    | Z    | 0.0001  | 0.0002  | 0.0005  | -0.0003 | -0.0007 | 0.0001  |
| AT.           | 9  | CA X | 0.0005  | -0.0001 | 0.0004  | 0.0009  | -0.0002 | -0.0002 |
|               |    | Y    | 0.0010  | -0.0002 | 0.0009  | -0.0005 | -0.0001 | -0.0004 |
|               |    | Z    | 0.0001  | -0.0002 | 0.0005  | -0.0003 | 0.0007  | 0.0001  |
| AT.           | 10 | SI X | -0.0011 | 0.0000  | 0.0030  | -0.0433 | 0.0000  | 0.0021  |
|               |    | Y    | 0.0000  | -0.0012 | 0.0000  | 0.0000  | -0.0300 | 0.0000  |
|               |    | Z    | 0.0024  | 0.0000  | 0.0038  | -0.0047 | 0.0000  | -0.0324 |
| AT.           | 11 | SI X | -0.0337 | 0.0000  | 0.0233  | 0.0035  | 0.0000  | -0.0012 |
|               |    | Y    | 0.0000  | 0.0439  | 0.0000  | 0.0000  | -0.0100 | 0.0000  |
|               |    | Z    | -0.0188 | 0.0000  | -0.0369 | -0.0025 | 0.0000  | 0.0033  |
| AT.           | 12 | SI X | 0.0073  | 0.0000  | -0.0015 | 0.0044  | 0.0000  | 0.0098  |
|               |    | Y    | 0.0000  | 0.0123  | 0.0000  | 0.0000  | 0.0312  | 0.0000  |
|               |    | Z    | -0.0005 | 0.0000  | -0.0074 | 0.0034  | 0.0000  | -0.0283 |
| AT.           | 13 | O X  | 0.0004  | 0.0000  | -0.0004 | 0.0020  | 0.0000  | -0.0121 |
|               |    | Y    | 0.0000  | 0.0001  | 0.0000  | 0.0000  | 0.0008  | 0.0000  |
|               |    | Z    | 0.0019  | 0.0000  | -0.0016 | -0.0019 | 0.0000  | 0.0448  |
| AT.           | 14 | O X  | 0.0039  | 0.0193  | -0.0159 | -0.0018 | -0.0035 | 0.0026  |
|               |    | Y    | -0.0057 | -0.0387 | 0.0334  | 0.0029  | 0.0086  | -0.0009 |
|               |    | Z    | -0.0012 | -0.0177 | 0.0171  | 0.0016  | 0.0043  | -0.0014 |
| AT.           | 15 | O X  | 0.0039  | -0.0193 | -0.0159 | -0.0018 | 0.0035  | 0.0026  |
|               |    | Y    | 0.0057  | -0.0387 | -0.0334 | -0.0029 | 0.0086  | 0.0009  |
|               |    | Z    | -0.0012 | 0.0177  | 0.0171  | 0.0016  | -0.0043 | -0.0014 |
| AT.           | 16 | O X  | 0.0497  | 0.0000  | -0.0120 | -0.0027 | 0.0000  | -0.0011 |
|               |    | Y    | 0.0000  | -0.0009 | 0.0000  | 0.0000  | 0.0006  | 0.0000  |
|               |    | Z    | 0.0099  | 0.0000  | -0.0000 | -0.0014 | 0.0000  | -0.0006 |
| AT.           | 17 | O X  | -0.0036 | 0.0000  | 0.0033  | 0.0016  | 0.0000  | 0.0009  |
|               |    | Y    | 0.0000  | 0.0047  | 0.0000  | 0.0000  | -0.0010 | 0.0000  |
|               |    | Z    | -0.0018 | 0.0000  | -0.0008 | -0.0010 | 0.0000  | -0.0006 |
| AT.           | 18 | O X  | 0.0053  | 0.0000  | 0.0032  | -0.0003 | 0.0000  | 0.0003  |
|               |    | Y    | 0.0000  | -0.0027 | 0.0000  | 0.0000  | 0.0007  | 0.0000  |
|               |    | Z    | 0.0276  | 0.0000  | 0.0312  | 0.0021  | 0.0000  | -0.0031 |
| AT.           | 19 | O X  | -0.0045 | 0.0000  | -0.0055 | 0.0388  | 0.0000  | 0.0130  |
|               |    | Y    | 0.0000  | 0.0006  | 0.0000  | 0.0000  | 0.0011  | 0.0000  |
|               |    | Z    | -0.0036 | 0.0000  | -0.0046 | 0.0247  | 0.0000  | 0.0096  |
| AT.           | 20 | O X  | 0.0033  | -0.0003 | -0.0003 | 0.0201  | -0.0174 | -0.0038 |
|               |    | Y    | -0.0059 | 0.0011  | -0.0005 | -0.0290 | 0.0275  | 0.0050  |
|               |    | Z    | -0.0012 | 0.0007  | -0.0012 | -0.0071 | 0.0065  | 0.0018  |
| AT.           | 21 | O X  | 0.0033  | 0.0003  | -0.0003 | 0.0201  | 0.0174  | -0.0038 |
|               |    | Y    | 0.0059  | 0.0011  | 0.0005  | 0.0290  | 0.0275  | -0.0050 |
|               |    | Z    | -0.0012 | -0.0007 | -0.0012 | -0.0071 | -0.0065 | 0.0018  |
| AT.           | 22 | O X  | -0.0035 | 0.0000  | 0.0019  | -0.0023 | 0.0000  | 0.0011  |
|               |    | Y    | 0.0000  | 0.0033  | 0.0000  | 0.0000  | -0.0025 | 0.0000  |
|               |    | Z    | 0.0017  | 0.0000  | 0.0025  | -0.0005 | 0.0000  | 0.0003  |
| AT.           | 23 | O X  | 0.0011  | 0.0000  | -0.0013 | -0.0049 | 0.0000  | -0.0011 |
|               |    | Y    | 0.0000  | 0.0012  | 0.0000  | 0.0000  | 0.0017  | 0.0000  |
|               |    | Z    | -0.0018 | 0.0000  | -0.0026 | 0.0014  | 0.0000  | -0.0013 |
| AT.           | 24 | O X  | 0.0057  | 0.0000  | -0.0018 | 0.0008  | 0.0000  | -0.0182 |
|               |    | Y    | 0.0000  | -0.0018 | 0.0000  | 0.0000  | -0.0008 | 0.0000  |
|               |    | Z    | -0.0163 | 0.0000  | 0.0062  | -0.0004 | 0.0000  | 0.0355  |
| AT.           | 25 | O X  | 0.0153  | 0.0000  | 0.0119  | -0.0056 | 0.0000  | 0.0128  |
|               |    | Y    | 0.0000  | -0.0006 | 0.0000  | 0.0000  | -0.0013 | 0.0000  |
|               |    | Z    | 0.0128  | 0.0000  | 0.0075  | -0.0057 | 0.0000  | 0.0122  |

|     |    |   |   |         |         |         |         |         |         |
|-----|----|---|---|---------|---------|---------|---------|---------|---------|
| AT. | 26 | O | X | -0.0154 | -0.0072 | -0.0028 | -0.0023 | -0.0192 | -0.0063 |
|     |    |   | Y | -0.0230 | -0.0112 | -0.0031 | -0.0002 | -0.0281 | -0.0081 |
|     |    |   | Z | 0.0025  | 0.0027  | -0.0009 | -0.0001 | 0.0036  | 0.0017  |
| AT. | 27 | O | X | -0.0154 | 0.0072  | -0.0028 | -0.0023 | 0.0192  | -0.0063 |
|     |    |   | Y | 0.0230  | -0.0112 | 0.0031  | 0.0002  | -0.0281 | 0.0081  |
|     |    |   | Z | 0.0025  | -0.0027 | -0.0009 | -0.0001 | -0.0036 | 0.0017  |

FREQ(CM\*\*-1)      930.28      976.68      987.06

|     |   |    |   |         |         |         |
|-----|---|----|---|---------|---------|---------|
| AT. | 1 | CA | X | 0.0000  | 0.0005  | -0.0005 |
|     |   |    | Y | 0.0006  | 0.0000  | 0.0000  |
|     |   |    | Z | 0.0000  | 0.0009  | -0.0001 |
| AT. | 2 | CA | X | 0.0004  | -0.0001 | 0.0005  |
|     |   |    | Y | -0.0000 | 0.0003  | -0.0007 |
|     |   |    | Z | 0.0004  | 0.0007  | -0.0001 |
| AT. | 3 | CA | X | -0.0004 | -0.0001 | 0.0005  |
|     |   |    | Y | -0.0000 | -0.0003 | 0.0007  |
|     |   |    | Z | -0.0004 | 0.0007  | -0.0001 |
| AT. | 4 | CA | X | -0.0004 | 0.0009  | 0.0004  |
|     |   |    | Y | -0.0003 | 0.0008  | 0.0001  |
|     |   |    | Z | -0.0003 | -0.0007 | 0.0015  |
| AT. | 5 | CA | X | 0.0004  | 0.0009  | 0.0004  |
|     |   |    | Y | -0.0003 | -0.0008 | -0.0001 |
|     |   |    | Z | 0.0003  | -0.0007 | 0.0015  |
| AT. | 6 | CA | X | 0.0000  | -0.0004 | -0.0000 |
|     |   |    | Y | -0.0009 | 0.0000  | 0.0000  |
|     |   |    | Z | 0.0000  | -0.0018 | -0.0005 |
| AT. | 7 | CA | X | 0.0000  | -0.0002 | -0.0003 |
|     |   |    | Y | -0.0009 | 0.0000  | 0.0000  |

[proxy:0:0@lmfz640] got pmi command (from 13): finalize

|     |   |    |   |         |         |         |
|-----|---|----|---|---------|---------|---------|
|     |   |    | Z | 0.0000  | -0.0002 | 0.0011  |
| AT. | 8 | CA | X | -0.0002 | 0.0000  | 0.0001  |
|     |   |    | Y | -0.0003 | 0.0001  | -0.0002 |
|     |   |    | Z | -0.0005 | -0.0006 | -0.0009 |

[proxy:0:0@lmfz640] PMI response: cmd=finalize\_ack

|     |    |    |   |         |         |         |
|-----|----|----|---|---------|---------|---------|
| AT. | 9  | CA | X | 0.0002  | 0.0000  | 0.0001  |
|     |    |    | Y | -0.0003 | -0.0001 | 0.0002  |
|     |    |    | Z | 0.0005  | -0.0006 | -0.0009 |
| AT. | 10 | SI | X | 0.0000  | -0.0050 | 0.0043  |
|     |    |    | Y | 0.0319  | 0.0000  | 0.0000  |
|     |    |    | Z | 0.0000  | 0.0013  | -0.0277 |
| AT. | 11 | SI | X | 0.0000  | -0.0011 | 0.0010  |
|     |    |    | Y | -0.0077 | 0.0000  | 0.0000  |
|     |    |    | Z | 0.0000  | 0.0052  | -0.0073 |
| AT. | 12 | SI | X | 0.0000  | -0.0375 | -0.0118 |
|     |    |    | Y | 0.0287  | 0.0000  | 0.0000  |
|     |    |    | Z | 0.0000  | -0.0120 | 0.0278  |
| AT. | 13 | O  | X | 0.0000  | 0.0016  | -0.0073 |
|     |    |    | Y | -0.0013 | 0.0000  | 0.0000  |
|     |    |    | Z | 0.0000  | -0.0031 | 0.0415  |
| AT. | 14 | O  | X | -0.0024 | 0.0005  | -0.0025 |
|     |    |    | Y | 0.0066  | -0.0027 | 0.0036  |
|     |    |    | Z | 0.0040  | -0.0020 | 0.0016  |
| AT. | 15 | O  | X | 0.0024  | 0.0005  | -0.0025 |
|     |    |    | Y | 0.0066  | 0.0027  | -0.0036 |
|     |    |    | Z | -0.0040 | -0.0020 | 0.0016  |
| AT. | 16 | O  | X | 0.0000  | 0.0007  | 0.0018  |
|     |    |    | Y | 0.0011  | 0.0000  | 0.0000  |
|     |    |    | Z | 0.0000  | -0.0016 | 0.0006  |
| AT. | 17 | O  | X | 0.0000  | 0.0000  | 0.0005  |
|     |    |    | Y | -0.0016 | 0.0000  | 0.0000  |

[proxy:0:0@lmfz640] got pmi command (from 21): finalize

[proxy:0:0@lmfz640] PMI response: cmd=finalize\_ack

|     |    |   |   |         |         |         |
|-----|----|---|---|---------|---------|---------|
|     |    |   | Z | 0.0000  | 0.0000  | -0.0031 |
| AT. | 18 | O | X | 0.0000  | 0.0004  | 0.0010  |
|     |    |   | Y | -0.0002 | 0.0000  | 0.0000  |
|     |    |   | Z | 0.0000  | -0.0057 | 0.0094  |
| AT. | 19 | O | X | 0.0000  | 0.0047  | 0.0093  |
|     |    |   | Y | 0.0004  | 0.0000  | 0.0000  |
|     |    |   | Z | 0.0000  | 0.0032  | 0.0078  |
| AT. | 20 | O | X | 0.0191  | 0.0011  | -0.0045 |
|     |    |   | Y | -0.0289 | -0.0042 | 0.0066  |
|     |    |   | Z | -0.0080 | -0.0006 | 0.0038  |
| AT. | 21 | O | X | -0.0191 | 0.0011  | -0.0045 |
|     |    |   | Y | -0.0289 | 0.0042  | -0.0066 |
|     |    |   | Z | 0.0080  | -0.0006 | 0.0038  |
| AT. | 22 | O | X | 0.0000  | -0.0020 | 0.0007  |

|          |   |         |         |         |
|----------|---|---------|---------|---------|
|          | Y | 0.0024  | 0.0000  | 0.0000  |
|          | Z | 0.0000  | -0.0011 | 0.0042  |
| AT. 23 O | X | 0.0000  | -0.0057 | -0.0003 |
|          | Y | 0.0096  | 0.0000  | 0.0000  |
|          | Z | 0.0000  | 0.0024  | -0.0007 |
| AT. 24 O | X | 0.0000  | 0.0060  | 0.0155  |
|          | Y | -0.0012 | 0.0000  | 0.0000  |
|          | Z | 0.0000  | -0.0135 | -0.0408 |
| AT. 25 O | X | 0.0000  | 0.0459  | -0.0080 |
|          | Y | 0.0004  | 0.0000  | 0.0000  |
|          | Z | 0.0000  | 0.0431  | -0.0093 |
| AT. 26 O | X | -0.0181 | 0.0095  | 0.0062  |
|          | Y | -0.0255 | 0.0127  | 0.0083  |
|          | Z | 0.0042  | -0.0007 | -0.0038 |
| AT. 27 O | X | 0.0181  | 0.0095  | 0.0062  |
|          | Y | -0.0255 | -0.0127 | -0.0083 |
|          | Z | -0.0042 | -0.0007 | -0.0038 |

[proxy:0:0@lmfz640] got pmi command (from 0): finalize

[proxy:0:0@lmfz640] PMI response: cmd=finalize\_ack  
ESTIMATED NUMBER OF IMAGINARY FREQS 1

\*\*\*\*\*

VIBRATIONAL TEMPERATURES (K) [MODE NUMBER;IRREP]

TO MODES

|                 |                 |                 |                 |
|-----------------|-----------------|-----------------|-----------------|
| 20.8 [ 4;A' ]   | 73.2 [ 5;A' ]   | 73.3 [ 6;B" ]   | 117.2 [ 7;B" ]  |
| 141.8 [ 8;A' ]  | 168.4 [ 9;A' ]  | 178.2 [ 10;B" ] | 184.9 [ 11;B" ] |
| 198.1 [ 12;A' ] | 205.2 [ 13;B" ] | 222.5 [ 14;A' ] | 225.9 [ 15;A' ] |
| 229.7 [ 16;B" ] | 242.5 [ 17;B" ] | 249.7 [ 18;A' ] | 254.9 [ 19;B" ] |
| 259.1 [ 20;A' ] | 266.1 [ 21;B" ] | 284.6 [ 22;A' ] | 284.7 [ 23;B" ] |
| 287.0 [ 24;B" ] | 303.3 [ 25;A' ] | 307.9 [ 26;A' ] | 312.7 [ 27;B" ] |
| 317.7 [ 28;A' ] | 325.9 [ 29;A' ] | 352.9 [ 30;B" ] | 353.9 [ 31;A' ] |
| 367.1 [ 32;B" ] | 371.3 [ 33;A' ] | 374.6 [ 34;A' ] | 387.2 [ 35;A' ] |
| 388.2 [ 36;A' ] | 410.8 [ 37;B" ] | 419.3 [ 38;A' ] | 423.9 [ 39;B" ] |
| 424.8 [ 40;B" ] | 434.1 [ 41;A' ] | 450.1 [ 42;B" ] | 454.1 [ 43;B" ] |
| 456.9 [ 44;B" ] | 457.8 [ 45;A' ] | 469.9 [ 46;A' ] | 477.7 [ 47;A' ] |
| 489.7 [ 48;B" ] | 498.2 [ 49;B" ] | 501.2 [ 50;A' ] | 512.1 [ 51;A' ] |
| 531.9 [ 52;A' ] | 548.2 [ 53;B" ] | 559.6 [ 54;A' ] | 567.6 [ 55;A' ] |
| 594.1 [ 56;B" ] | 629.0 [ 57;A' ] | 645.4 [ 58;A' ] | 653.2 [ 59;A' ] |
| 658.0 [ 60;B" ] | 711.3 [ 61;A' ] | 715.4 [ 62;B" ] | 725.6 [ 63;A' ] |

[proxy:0:0@lmfz640] got pmi command (from 6): finalize

[proxy:0:0@lmfz640] PMI response: cmd=finalize\_ack

|                  |                  |                  |                  |
|------------------|------------------|------------------|------------------|
| 731.6 [ 64;A' ]  | 759.1 [ 65;B" ]  | 762.3 [ 66;A' ]  | 765.0 [ 67;A' ]  |
| 768.4 [ 68;B" ]  | 785.0 [ 69;A' ]  | 1181.3 [ 70;A' ] | 1231.4 [ 71;A' ] |
| 1244.1 [ 72;A' ] | 1255.0 [ 73;A' ] | 1283.6 [ 74;B" ] | 1304.8 [ 75;A' ] |
| 1308.8 [ 76;A' ] | 1316.7 [ 77;B" ] | 1336.7 [ 78;A' ] | 1338.5 [ 79;B" ] |
| 1405.2 [ 80;A' ] | 1420.2 [ 81;A' ] |                  |                  |

\*\*\*\*\*

HARMONIC VIBRATIONAL CONTRIBUTIONS TO THERMODYNAMIC FUNCTIONS AT GIVEN TEMPERATURE AND PRESSURE:

(EL = ELECTRONIC ENERGY  
E0 = ZERO-POINT ENERGY  
ET = THERMAL CONTRIBUTION TO THE VIBRATIONAL ENERGY  
PV = PRESSURE \* VOLUME  
TS = TEMPERATURE \* ENTROPY)

|    | AU/CELL              | EV/CELL              | KJ/MOL             |
|----|----------------------|----------------------|--------------------|
| EL | : -8070.316905547273 | -219604.487476348411 | -21188614.04949711 |
| E0 | : 0.068004327334     | 1.850491823936       | 178.54533625       |

\*\*\*\*\*

THERMODYNAMIC FUNCTIONS WITH VIBRATIONAL CONTRIBUTIONS

AT (T = 298.15 K, P = 0.10132500E+00 MPA):

|                                                         | AU/CELL | EV/CELL | KJ/MOL |
|---------------------------------------------------------|---------|---------|--------|
| [proxy:0:0@lmfz640] got pmi command (from 17): finalize |         |         |        |

[proxy:0:0@lmfz640] PMI response: cmd=finalize\_ack

OTHER THERMODYNAMIC FUNCTIONS:

\*\*\*\*\*

total 462532

```

-rw-rw-r-- 1 vlasta vlasta 0 lis 11 14:14 dffit3.dat
-rw-rw-r-- 1 vlasta vlasta 5978 lis 11 21:19 ERROR
-rw-rw-r-- 1 vlasta vlasta 5978 lis 11 21:19 ERROR.pe1
-rw-rw-r-- 1 vlasta vlasta 5978 lis 11 21:19 ERROR.pe2
-rw-rw-r-- 1 vlasta vlasta 5978 lis 11 21:19 ERROR.pe3
-rw-rw-r-- 1 vlasta vlasta 5978 lis 11 21:19 ERROR.pe4
-rw-rw-r-- 1 vlasta vlasta 5978 lis 11 21:19 ERROR.pe5
-rw-rw-r-- 1 vlasta vlasta 5978 lis 11 21:19 ERROR.pe6
-rw-rw-r-- 1 vlasta vlasta 5978 lis 11 21:19 ERROR.pe7
-rw-rw-r-- 1 vlasta vlasta 27160 lis 11 21:20 fort.10.pe0
-rw-rw-r-- 1 vlasta vlasta 27373856 lis 11 21:16 fort.10.pe1
-rw-rw-r-- 1 vlasta vlasta 27373856 lis 11 21:16 fort.10.pe2
-rw-rw-r-- 1 vlasta vlasta 23952128 lis 11 21:16 fort.10.pe3
-rw-rw-r-- 1 vlasta vlasta 30795592 lis 11 21:16 fort.10.pe4
-rw-rw-r-- 1 vlasta vlasta 27373864 lis 11 21:16 fort.10.pe5
-rw-rw-r-- 1 vlasta vlasta 27373864 lis 11 21:16 fort.10.pe6
-rw-rw-r-- 1 vlasta vlasta 30795592 lis 11 21:16 fort.10.pe7
-rw-rw-r-- 1 vlasta vlasta 1394664 lis 11 21:17 fort.11.pe0
-rw-rw-r-- 1 vlasta vlasta 1394664 lis 11 21:17 fort.11.pe1
-rw-rw-r-- 1 vlasta vlasta 1394664 lis 11 21:17 fort.11.pe2
-rw-rw-r-- 1 vlasta vlasta 1394664 lis 11 21:17 fort.11.pe3
-rw-rw-r-- 1 vlasta vlasta 1394664 lis 11 21:17 fort.11.pe4
-rw-rw-r-- 1 vlasta vlasta 1394664 lis 11 21:17 fort.11.pe5
-rw-rw-r-- 1 vlasta vlasta 1394664 lis 11 21:17 fort.11.pe6
-rw-rw-r-- 1 vlasta vlasta 1394664 lis 11 21:17 fort.11.pe7
-rw-rw-r-- 1 vlasta vlasta 50480 lis 11 21:11 fort.12
-rw-rw-r-- 1 vlasta vlasta 2764696 lis 11 14:21 fort.13
-rw-rw-r-- 1 vlasta vlasta 0 lis 11 14:14 fort.17.pe1
-rw-rw-r-- 1 vlasta vlasta 0 lis 11 14:14 fort.17.pe2
-rw-rw-r-- 1 vlasta vlasta 0 lis 11 14:14 fort.17.pe3
-rw-rw-r-- 1 vlasta vlasta 0 lis 11 14:14 fort.17.pe4
-rw-rw-r-- 1 vlasta vlasta 0 lis 11 14:14 fort.17.pe5
-rw-rw-r-- 1 vlasta vlasta 0 lis 11 14:14 fort.17.pe6
-rw-rw-r-- 1 vlasta vlasta 0 lis 11 14:14 fort.17.pe7
-rw-rw-r-- 1 vlasta vlasta 0 lis 11 14:14 fort.18.pe0
-rw-rw-r-- 1 vlasta vlasta 0 lis 11 14:14 fort.18.pe1
-rw-rw-r-- 1 vlasta vlasta 0 lis 11 14:14 fort.18.pe2
-rw-rw-r-- 1 vlasta vlasta 0 lis 11 14:14 fort.18.pe3
-rw-rw-r-- 1 vlasta vlasta 0 lis 11 14:14 fort.18.pe4
-rw-rw-r-- 1 vlasta vlasta 0 lis 11 14:14 fort.18.pe5
-rw-rw-r-- 1 vlasta vlasta 0 lis 11 14:14 fort.18.pe6
-rw-rw-r-- 1 vlasta vlasta 0 lis 11 14:14 fort.18.pe7
-rw-rw-r-- 1 vlasta vlasta 1776 lis 11 21:20 fort.19.pe0
-rw-rw-r-- 1 vlasta vlasta 157248 lis 11 21:20 fort.19.pe1

```

```

-rw-rw-r-- 1 vlasta vlasta 157248 lis 11 21:20 fort.19.pe2
-rw-rw-r-- 1 vlasta vlasta 157248 lis 11 21:20 fort.19.pe3
-rw-rw-r-- 1 vlasta vlasta 157248 lis 11 21:20 fort.19.pe4
-rw-rw-r-- 1 vlasta vlasta 157248 lis 11 21:20 fort.19.pe5
-rw-rw-r-- 1 vlasta vlasta 157248 lis 11 21:20 fort.19.pe6
-rw-rw-r-- 1 vlasta vlasta 157248 lis 11 21:20 fort.19.pe7
-rw-rw-r-- 1 vlasta vlasta 0 lis 11 14:14 fort.1.pe0
-rw-rw-r-- 1 vlasta vlasta 0 lis 11 14:14 fort.1.pe1
-rw-rw-r-- 1 vlasta vlasta 0 lis 11 14:14 fort.1.pe2
-rw-rw-r-- 1 vlasta vlasta 0 lis 11 14:14 fort.1.pe3
-rw-rw-r-- 1 vlasta vlasta 0 lis 11 14:14 fort.1.pe4
-rw-rw-r-- 1 vlasta vlasta 0 lis 11 14:14 fort.1.pe5
-rw-rw-r-- 1 vlasta vlasta 0 lis 11 14:14 fort.1.pe6
-rw-rw-r-- 1 vlasta vlasta 0 lis 11 14:14 fort.1.pe7
-rw-rw-r-- 1 vlasta vlasta 2174324 lis 11 14:21 fort.20
-rw-rw-r-- 1 vlasta vlasta 0 lis 11 14:14 fort.28
-rw-rw-r-- 1 vlasta vlasta 0 lis 11 14:14 fort.29
-rw-rw-r-- 1 vlasta vlasta 0 lis 11 14:14 fort.38.pe0
-rw-rw-r-- 1 vlasta vlasta 0 lis 11 14:14 fort.38.pe1
-rw-rw-r-- 1 vlasta vlasta 0 lis 11 14:14 fort.38.pe2
-rw-rw-r-- 1 vlasta vlasta 0 lis 11 14:14 fort.38.pe3
-rw-rw-r-- 1 vlasta vlasta 0 lis 11 14:14 fort.38.pe4
-rw-rw-r-- 1 vlasta vlasta 0 lis 11 14:14 fort.38.pe5
-rw-rw-r-- 1 vlasta vlasta 0 lis 11 14:14 fort.38.pe6
-rw-rw-r-- 1 vlasta vlasta 0 lis 11 14:14 fort.38.pe7
-rw-rw-r-- 1 vlasta vlasta 0 lis 11 14:14 fort.3.pe0
-rw-rw-r-- 1 vlasta vlasta 0 lis 11 14:14 fort.3.pe1
-rw-rw-r-- 1 vlasta vlasta 0 lis 11 14:14 fort.3.pe2
-rw-rw-r-- 1 vlasta vlasta 0 lis 11 14:14 fort.3.pe3
-rw-rw-r-- 1 vlasta vlasta 0 lis 11 14:14 fort.3.pe4
-rw-rw-r-- 1 vlasta vlasta 0 lis 11 14:14 fort.3.pe5
-rw-rw-r-- 1 vlasta vlasta 0 lis 11 14:14 fort.3.pe6
-rw-rw-r-- 1 vlasta vlasta 0 lis 11 14:14 fort.3.pe7
-rw-rw-r-- 1 vlasta vlasta 534896 lis 11 21:19 fort.40.pe0
-rw-rw-r-- 1 vlasta vlasta 534896 lis 11 21:19 fort.40.pe1
-rw-rw-r-- 1 vlasta vlasta 534896 lis 11 21:19 fort.40.pe2
-rw-rw-r-- 1 vlasta vlasta 534896 lis 11 21:19 fort.40.pe3
-rw-rw-r-- 1 vlasta vlasta 534896 lis 11 21:19 fort.40.pe4
-rw-rw-r-- 1 vlasta vlasta 534896 lis 11 21:19 fort.40.pe5
-rw-rw-r-- 1 vlasta vlasta 534896 lis 11 21:19 fort.40.pe6
-rw-rw-r-- 1 vlasta vlasta 534896 lis 11 21:19 fort.40.pe7
-rw-rw-r-- 1 vlasta vlasta 23952128 lis 11 21:17 fort.8.pe0
-rw-rw-r-- 1 vlasta vlasta 27373856 lis 11 21:17 fort.8.pe1
-rw-rw-r-- 1 vlasta vlasta 27373856 lis 11 21:17 fort.8.pe2
-rw-rw-r-- 1 vlasta vlasta 23952128 lis 11 21:17 fort.8.pe3
-rw-rw-r-- 1 vlasta vlasta 30795592 lis 11 21:17 fort.8.pe4
-rw-rw-r-- 1 vlasta vlasta 27373864 lis 11 21:17 fort.8.pe5
-rw-rw-r-- 1 vlasta vlasta 27373864 lis 11 21:17 fort.8.pe6
-rw-rw-r-- 1 vlasta vlasta 30795592 lis 11 21:17 fort.8.pe7
-rw-rw-r-- 1 vlasta vlasta 2174324 lis 11 14:21 fort.9
-rw-rw-r-- 1 vlasta vlasta 1434280 lis 11 21:16 fort.95.pe0
-rw-rw-r-- 1 vlasta vlasta 1434280 lis 11 21:16 fort.95.pe1
-rw-rw-r-- 1 vlasta vlasta 1434280 lis 11 21:16 fort.95.pe2
-rw-rw-r-- 1 vlasta vlasta 1434280 lis 11 21:16 fort.95.pe3
-rw-rw-r-- 1 vlasta vlasta 1434280 lis 11 21:16 fort.95.pe4
-rw-rw-r-- 1 vlasta vlasta 1434280 lis 11 21:16 fort.95.pe5
-rw-rw-r-- 1 vlasta vlasta 1434280 lis 11 21:16 fort.95.pe6
-rw-rw-r-- 1 vlasta vlasta 1434280 lis 11 21:16 fort.95.pe7
-rw-rw-r-- 1 vlasta vlasta 11512815 lis 11 21:20 FREQINFO.DAT
-rw-rw-r-- 1 vlasta vlasta 139422 lis 11 21:20 HESSFREQ.DAT
-rw-rw-r-- 1 vlasta vlasta 3564 lis 11 14:14 INPUT
-rw-rw-r-- 1 vlasta vlasta 64 lis 11 14:14 machines
-rwxr-xr-x 1 vlasta vlasta 11332453 lis 11 14:14 Pcrystal
-rw-rw-r-- 1 vlasta vlasta 1198932 lis 11 21:20 SCFOUT.LOG
-----

```

```

== Removing scratch directories on: ...
== finished pet, 11.10.2019. 21:20:34 CEST
== Elapsed time: 7h:06m:09s

```

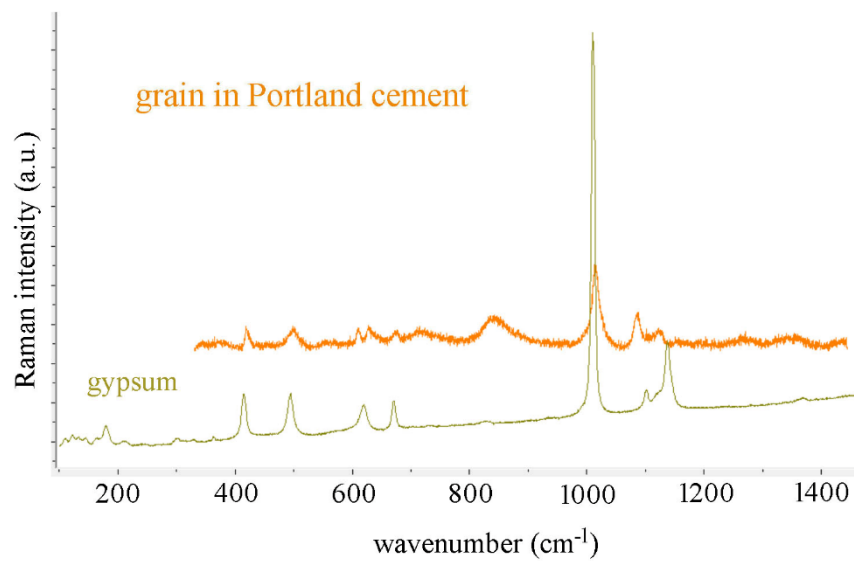

**Figure S1.** Comparison of Raman spectra of gypsum and Portland cement.

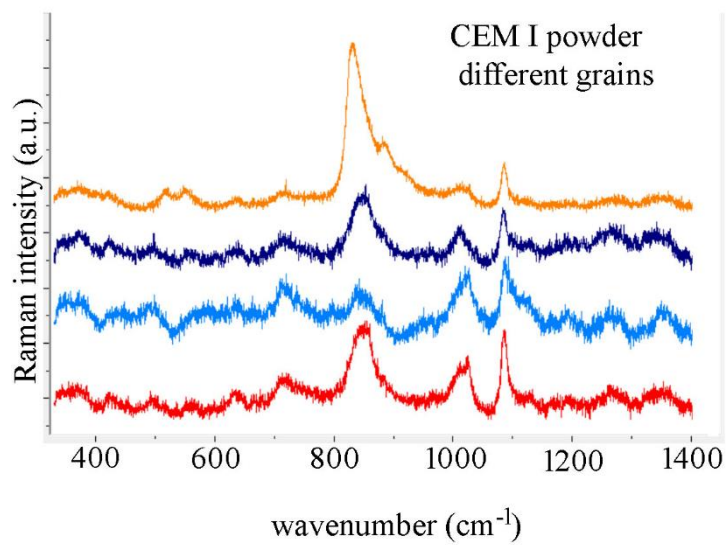

**Figure S2.** Raman spectra of CEM I powder, collected at four different sites.

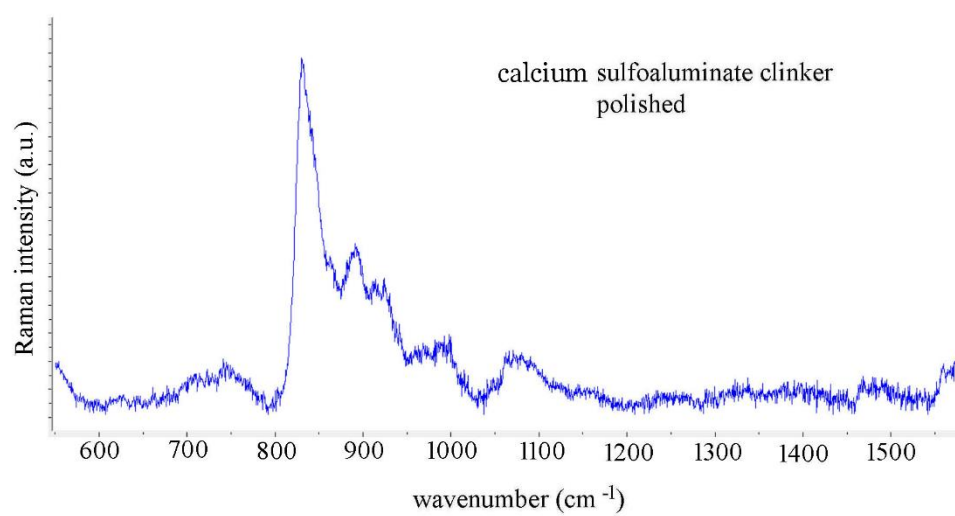

**Figure S3.** Raman spectrum of polished sample of calcium sulfoaluminate clinker.
